# Supplementary material
Source: publisher figshare collection journal article supplement (https://acs.figshare.com/ndownloader/files/3895315)
Supplement: Supplementary file 1 [file 3895315]

 
data_Ce
 
_audit_creation_method            SHELXL-2013
_chemical_name_systematic
;
 ?
;
_chemical_name_common             'cerium tellurium vanadate' 
_chemical_melting_point           'N/A'
_chemical_formula_moiety          CeTe3V3O15(OH)3(H2O)2
_chemical_formula_sum
 'Ce O20 Te3 V3' 
_chemical_formula_weight          995.74

loop_
 _atom_type_symbol
 _atom_type_description
 _atom_type_scat_dispersion_real
 _atom_type_scat_dispersion_imag
 _atom_type_scat_source
 'O'  'O'   0.0106   0.0060
 'International Tables Vol C Tables 4.2.6.8 and 6.1.1.4'
 'V'  'V'   0.3005   0.5294
 'International Tables Vol C Tables 4.2.6.8 and 6.1.1.4'
 'Te'  'Te'  -0.5308   1.6751
 'International Tables Vol C Tables 4.2.6.8 and 6.1.1.4'
 'Ce'  'Ce'  -0.2486   2.6331
 'International Tables Vol C Tables 4.2.6.8 and 6.1.1.4'
 
_space_group_crystal_system       hexagonal
_space_group_IT_number            194
_space_group_name_H-M_alt         'P 63/m m c'
_space_group_name_Hall            '-P 6c 2c'
 
_shelx_space_group_comment
;
The symmetry employed for this shelxl refinement is uniquely defined
by the following loop, which should always be used as a source of
symmetry information in preference to the above space-group names.
They are only intended as comments.
;
 
loop_
 _space_group_symop_operation_xyz
 'x, y, z'
 '-y, x-y, z'
 '-x+y, -x, z'
 '-x, -y, z+1/2'
 'y, -x+y, z+1/2'
 'x-y, x, z+1/2'
 'y, x, -z'
 'x-y, -y, -z'
 '-x, -x+y, -z'
 '-y, -x, -z+1/2'
 '-x+y, y, -z+1/2'
 'x, x-y, -z+1/2'
 '-x, -y, -z'
 'y, -x+y, -z'
 'x-y, x, -z'
 'x, y, -z-1/2'
 '-y, x-y, -z-1/2'
 '-x+y, -x, -z-1/2'
 '-y, -x, z'
 '-x+y, y, z'
 'x, x-y, z'
 'y, x, z-1/2'
 'x-y, -y, z-1/2'
 '-x, -x+y, z-1/2'
 
_cell_length_a                    12.166(5)
_cell_length_b                    12.166(5)
_cell_length_c                    12.537(5)
_cell_angle_alpha                 90
_cell_angle_beta                  90
_cell_angle_gamma                 120
_cell_volume                      1606.9(15)
_cell_formula_units_Z             4
_cell_measurement_temperature     100(2)
_cell_measurement_reflns_used     1412 
_cell_measurement_theta_min       2.525
_cell_measurement_theta_max       26.371 
 
_exptl_crystal_description        'hexagonal' 
_exptl_crystal_colour             'dark red' 
_exptl_crystal_density_meas       'N/A' 
_exptl_crystal_density_method     'not measured'             
_exptl_crystal_density_diffrn     4.116          
_exptl_crystal_F_000              1772
_exptl_transmission_factor_min    0.888                                            
_exptl_transmission_factor_max    0.906                                             
_exptl_crystal_size_max           0.020 
_exptl_crystal_size_mid           0.010  
_exptl_crystal_size_min           0.010 
_exptl_absorpt_coefficient_mu     9.915
_shelx_estimated_absorpt_T_min    'N/A' 
_shelx_estimated_absorpt_T_max    'N/A' 
_exptl_absorpt_correction_type    'numerical' 
_exptl_absorpt_correction_T_min   ?
_exptl_absorpt_correction_T_max   ? 
_exptl_absorpt_process_details    'SHELTXPREP'  
 
_exptl_special_details
;
 ?
;
 
_diffrn_ambient_temperature       100(2)
_diffrn_radiation_wavelength      0.71073
_diffrn_radiation_type            MoK\a
_diffrn_source                    'Imus microfocused'                       
_diffrn_measurement_device_type   'BRUKER apex II' 
_diffrn_measurement_method        '0.5 wide w/ exposures'
_diffrn_detector_area_resol_mean  0
_diffrn_reflns_number             19490
_diffrn_reflns_av_unetI/netI      0.0149
_diffrn_reflns_av_R_equivalents   0.0626
_diffrn_reflns_limit_h_min        -15
_diffrn_reflns_limit_h_max        15
_diffrn_reflns_limit_k_min        -15
_diffrn_reflns_limit_k_max        15
_diffrn_reflns_limit_l_min        -15
_diffrn_reflns_limit_l_max        15
_diffrn_reflns_theta_min          2.525
_diffrn_reflns_theta_max          26.371
_diffrn_reflns_theta_full         25.242
_diffrn_measured_fraction_theta_max   0.998
_diffrn_measured_fraction_theta_full  0.998
_diffrn_reflns_Laue_measured_fraction_max    0.998
_diffrn_reflns_Laue_measured_fraction_full   0.998
_diffrn_reflns_point_group_measured_fraction_max   0.998
_diffrn_reflns_point_group_measured_fraction_full  0.998
_reflns_number_total              658
_reflns_number_gt                 605
_reflns_threshold_expression      'I > 2\s(I)'
_reflns_Friedel_coverage          0.000
_reflns_Friedel_fraction_max      .
_reflns_Friedel_fraction_full     .
 
_reflns_special_details
;
 Reflections were merged by SHELXL according to the crystal
 class for the calculation of statistics and refinement.
 
 _reflns_Friedel_fraction is defined as the number of unique
 Friedel pairs measured divided by the number that would be
 possible theoretically, ignoring centric projections and
 systematic absences.
;
 
_computing_data_collection        'smart' 
_computing_cell_refinement        'smart saint'
_computing_data_reduction         'SAINT'
_computing_structure_solution     'SHELXT-2013 (Sheldrick, 2013)'
_computing_structure_refinement   'SHELXL-2013 (Sheldrick, 2013)'
_computing_molecular_graphics     'SHELXP-2013 (Sheldrick, 2013)'
_computing_publication_material   'SHELXCIF-2013 (Sheldrick, 2013)'
 
_refine_special_details
;
 ?
;
_refine_ls_structure_factor_coef  Fsqd
_refine_ls_matrix_type            full
_refine_ls_weighting_scheme       calc
_refine_ls_weighting_details
'w=1/[\s^2^(Fo^2^)+(0.0459P)^2^+38.8826P] where P=(Fo^2^+2Fc^2^)/3'
_atom_sites_solution_primary      ?
_atom_sites_solution_secondary    ?
_atom_sites_solution_hydrogens    .
_refine_ls_hydrogen_treatment     undef
_refine_ls_extinction_method      none
_refine_ls_extinction_coef        .
_refine_ls_number_reflns          658
_refine_ls_number_parameters      74
_refine_ls_number_restraints      39
_refine_ls_R_factor_all           0.0427
_refine_ls_R_factor_gt            0.0389
_refine_ls_wR_factor_ref          0.1017
_refine_ls_wR_factor_gt           0.0992
_refine_ls_goodness_of_fit_ref    1.149
_refine_ls_restrained_S_all       1.130
_refine_ls_shift/su_max           0.019
_refine_ls_shift/su_mean          0.001
 
loop_
 _atom_site_label
 _atom_site_type_symbol
 _atom_site_fract_x
 _atom_site_fract_y
 _atom_site_fract_z
 _atom_site_U_iso_or_equiv
 _atom_site_adp_type
 _atom_site_occupancy
 _atom_site_site_symmetry_order  
 _atom_site_calc_flag
 _atom_site_refinement_flags_posn
 _atom_site_refinement_flags_adp
 _atom_site_refinement_flags_occupancy
 _atom_site_disorder_assembly
 _atom_site_disorder_group
Ce1 Ce -0.3333 0.3333 0.09258(8) 0.0094(3) Uani 1 6 d S TU P . .
Te1 Te -0.39630(13) 0.03132(13) 0.2500 0.0128(3) Uani 0.5 2 d S TU P . .
Te2 Te -0.5000 0.0000 0.5000 0.0098(3) Uani 1 4 d S TU P . .
V1 V -0.16177(10) 0.16177(10) 0.5030(2) 0.0245(6) Uani 1 2 d S TU P . .
O1 O -0.5295(3) -0.0589(7) 0.3529(6) 0.0131(15) Uani 1 2 d S TU P . .
O2 O -0.3322(5) 0.1270(5) 0.4606(4) 0.0157(11) Uani 1 1 d . U . . .
O3 O -0.4088(6) 0.1823(11) 0.2500 0.025(3) Uani 1 4 d S TU P . .
O4 O -0.3333 0.3333 -0.1103(11) 0.017(3) Uani 1 6 d S TU P . .
O5 O -0.2162(11) 0.0010(12) 0.4599(10) 0.028(3) Uani 0.5 1 d . U P . .
O6A O -0.1618(10) 0.1618(10) 0.6250(19) 0.040(5) Uani 0.5 2 d S TU P . .
O6B O -0.1936(12) 0.1936(12) 0.6471(18) 0.042(5) Uani 0.5 2 d S TU P . .
O7 O -0.1339(10) 0.1339(10) 0.3555(19) 0.045(4) Uani 0.5 2 d S TU P . .
OW1A O 0.0000 0.0000 0.404(2) 0.056(5) Uani 0.96 6 d S TU P . .
OW1B O 0.0000 0.0000 0.0000 0.258(7) Uani 0.08 12 d S TU P . .
 
loop_
 _atom_site_aniso_label
 _atom_site_aniso_U_11
 _atom_site_aniso_U_22
 _atom_site_aniso_U_33
 _atom_site_aniso_U_23
 _atom_site_aniso_U_13
 _atom_site_aniso_U_12
Ce1 0.0093(4) 0.0093(4) 0.0098(5) 0.000 0.000 0.00464(18)
Te1 0.0127(7) 0.0103(7) 0.0145(7) 0.000 0.000 0.0050(6)
Te2 0.0096(4) 0.0087(5) 0.0109(5) 0.0005(4) 0.00025(18) 0.0043(2)
V1 0.0094(7) 0.0094(7) 0.0530(15) 0.0064(5) -0.0064(5) 0.0035(8)
O1 0.018(3) 0.011(4) 0.009(3) 0.000(3) 0.0002(14) 0.0054(18)
O2 0.007(2) 0.012(2) 0.025(3) 0.006(2) 0.002(2) 0.002(2)
O3 0.038(6) 0.012(5) 0.015(5) 0.000 0.000 0.006(3)
O4 0.021(4) 0.021(4) 0.011(5) 0.000 0.000 0.010(2)
O5 0.014(6) 0.018(5) 0.055(7) 0.002(5) 0.007(5) 0.011(5)
O6A 0.048(10) 0.048(10) 0.045(7) 0.008(3) -0.008(3) 0.040(12)
O6B 0.050(10) 0.050(10) 0.037(7) 0.008(3) -0.008(3) 0.034(11)
O7 0.031(7) 0.031(7) 0.066(8) -0.012(5) 0.012(5) 0.012(9)
OW1A 0.053(4) 0.053(4) 0.063(7) 0.000 0.000 0.027(2)
OW1B 0.258(6) 0.258(6) 0.258(9) 0.000 0.000 0.129(3)
 
_geom_special_details
;
 All esds (except the esd in the dihedral angle between two l.s. planes)
 are estimated using the full covariance matrix.  The cell esds are taken
 into account individually in the estimation of esds in distances, angles
 and torsion angles; correlations between esds in cell parameters are only
 used when they are defined by crystal symmetry.  An approximate (isotropic)
 treatment of cell esds is used for estimating esds involving l.s. planes.
;
 
loop_
 _geom_bond_atom_site_label_1
 _geom_bond_atom_site_label_2
 _geom_bond_distance
 _geom_bond_site_symmetry_2
 _geom_bond_publ_flag
Ce1 O3 2.535(8) 2_565 ?
Ce1 O3 2.535(8) . ?
Ce1 O3 2.535(8) 3_455 ?
Ce1 O4 2.544(14) . ?
Ce1 O2 2.604(6) 16_556 ?
Ce1 O2 2.604(6) 10 ?
Ce1 O2 2.604(6) 11_455 ?
Ce1 O2 2.604(6) 17_566 ?
Ce1 O2 2.604(6) 18_456 ?
Ce1 O2 2.604(6) 12_565 ?
Ce1 Te2 3.6988(14) 4_454 ?
Ce1 Te2 3.6988(14) 5_554 ?
Te1 O3 1.918(10) . ?
Te1 O1 1.927(6) 16_556 ?
Te1 O1 1.927(6) . ?
Te1 Te1 2.142(3) 20_455 ?
Te2 O2 1.909(5) . ?
Te2 O2 1.909(5) 13_456 ?
Te2 O2 1.909(5) 20_455 ?
Te2 O2 1.909(5) 8_556 ?
Te2 O1 1.946(7) . ?
Te2 O1 1.946(7) 13_456 ?
Te2 Ce1 3.6988(14) 4_455 ?
Te2 Ce1 3.6988(14) 16_556 ?
V1 O6A 1.53(2) . ?
V1 O5 1.805(13) 14_556 ?
V1 O5 1.805(13) 8_556 ?
V1 O5 1.806(13) 19 ?
V1 O5 1.806(13) . ?
V1 O6B 1.93(2) . ?
V1 O7 1.94(2) . ?
V1 O2 1.970(5) 19 ?
V1 O2 1.970(5) . ?
O1 Te1 1.927(6) 20_455 ?
O2 Ce1 2.604(6) 16_556 ?
O3 Te1 1.918(10) 20_455 ?
O3 Ce1 2.535(8) 16_556 ?
O5 O5 1.01(3) 8_556 ?
O5 V1 1.805(13) 15_556 ?
O6A O6B 0.72(3) . ?
OW1A OW1B 1.20(3) 4 ?
OW1B OW1A 1.20(3) 16_556 ?
OW1B OW1A 1.20(3) 4_554 ?
 
loop_
 _geom_angle_atom_site_label_1
 _geom_angle_atom_site_label_2
 _geom_angle_atom_site_label_3
 _geom_angle
 _geom_angle_site_symmetry_1
 _geom_angle_site_symmetry_3
 _geom_angle_publ_flag
O3 Ce1 O3 65.8(3) 2_565 . ?
O3 Ce1 O3 65.8(3) 2_565 3_455 ?
O3 Ce1 O3 65.8(3) . 3_455 ?
O3 Ce1 O4 141.1(2) 2_565 . ?
O3 Ce1 O4 141.1(2) . . ?
O3 Ce1 O4 141.1(2) 3_455 . ?
O3 Ce1 O2 101.33(12) 2_565 16_556 ?
O3 Ce1 O2 71.1(2) . 16_556 ?
O3 Ce1 O2 136.57(19) 3_455 16_556 ?
O4 Ce1 O2 75.16(12) . 16_556 ?
O3 Ce1 O2 71.1(2) 2_565 10 ?
O3 Ce1 O2 101.33(12) . 10 ?
O3 Ce1 O2 136.57(19) 3_455 10 ?
O4 Ce1 O2 75.16(12) . 10 ?
O2 Ce1 O2 57.3(2) 16_556 10 ?
O3 Ce1 O2 136.57(19) 2_565 11_455 ?
O3 Ce1 O2 71.1(2) . 11_455 ?
O3 Ce1 O2 101.33(12) 3_455 11_455 ?
O4 Ce1 O2 75.16(12) . 11_455 ?
O2 Ce1 O2 58.3(2) 16_556 11_455 ?
O2 Ce1 O2 113.68(10) 10 11_455 ?
O3 Ce1 O2 71.1(2) 2_565 17_566 ?
O3 Ce1 O2 136.57(19) . 17_566 ?
O3 Ce1 O2 101.33(12) 3_455 17_566 ?
O4 Ce1 O2 75.16(12) . 17_566 ?
O2 Ce1 O2 113.68(10) 16_556 17_566 ?
O2 Ce1 O2 58.3(2) 10 17_566 ?
O2 Ce1 O2 150.3(2) 11_455 17_566 ?
O3 Ce1 O2 136.57(19) 2_565 18_456 ?
O3 Ce1 O2 101.33(12) . 18_456 ?
O3 Ce1 O2 71.1(2) 3_455 18_456 ?
O4 Ce1 O2 75.16(12) . 18_456 ?
O2 Ce1 O2 113.68(10) 16_556 18_456 ?
O2 Ce1 O2 150.3(2) 10 18_456 ?
O2 Ce1 O2 57.3(2) 11_455 18_456 ?
O2 Ce1 O2 113.68(10) 17_566 18_456 ?
O3 Ce1 O2 101.33(12) 2_565 12_565 ?
O3 Ce1 O2 136.57(19) . 12_565 ?
O3 Ce1 O2 71.1(2) 3_455 12_565 ?
O4 Ce1 O2 75.16(12) . 12_565 ?
O2 Ce1 O2 150.3(2) 16_556 12_565 ?
O2 Ce1 O2 113.68(10) 10 12_565 ?
O2 Ce1 O2 113.68(10) 11_455 12_565 ?
O2 Ce1 O2 57.3(2) 17_566 12_565 ?
O2 Ce1 O2 58.3(2) 18_456 12_565 ?
O3 Ce1 Te2 122.84(5) 2_565 4_454 ?
O3 Ce1 Te2 69.4(2) . 4_454 ?
O3 Ce1 Te2 122.84(5) 3_455 4_454 ?
O4 Ce1 Te2 71.712(18) . 4_454 ?
O2 Ce1 Te2 29.19(11) 16_556 4_454 ?
O2 Ce1 Te2 85.14(11) 10 4_454 ?
O2 Ce1 Te2 29.19(11) 11_455 4_454 ?
O2 Ce1 Te2 135.78(12) 17_566 4_454 ?
O2 Ce1 Te2 85.14(11) 18_456 4_454 ?
O2 Ce1 Te2 135.78(12) 12_565 4_454 ?
O3 Ce1 Te2 69.4(2) 2_565 5_554 ?
O3 Ce1 Te2 122.84(5) . 5_554 ?
O3 Ce1 Te2 122.84(5) 3_455 5_554 ?
O4 Ce1 Te2 71.712(18) . 5_554 ?
O2 Ce1 Te2 85.14(11) 16_556 5_554 ?
O2 Ce1 Te2 29.19(11) 10 5_554 ?
O2 Ce1 Te2 135.78(12) 11_455 5_554 ?
O2 Ce1 Te2 29.19(11) 17_566 5_554 ?
O2 Ce1 Te2 135.78(12) 18_456 5_554 ?
O2 Ce1 Te2 85.14(11) 12_565 5_554 ?
Te2 Ce1 Te2 110.628(17) 4_454 5_554 ?
O3 Te1 O1 95.7(2) . 16_556 ?
O3 Te1 O1 95.7(2) . . ?
O1 Te1 O1 84.0(4) 16_556 . ?
O3 Te1 Te1 56.1(2) . 20_455 ?
O1 Te1 Te1 56.24(13) 16_556 20_455 ?
O1 Te1 Te1 56.24(13) . 20_455 ?
O2 Te2 O2 180.0 . 13_456 ?
O2 Te2 O2 83.3(3) . 20_455 ?
O2 Te2 O2 96.7(3) 13_456 20_455 ?
O2 Te2 O2 96.7(3) . 8_556 ?
O2 Te2 O2 83.3(3) 13_456 8_556 ?
O2 Te2 O2 180.0 20_455 8_556 ?
O2 Te2 O1 88.8(2) . . ?
O2 Te2 O1 91.2(2) 13_456 . ?
O2 Te2 O1 88.8(2) 20_455 . ?
O2 Te2 O1 91.2(2) 8_556 . ?
O2 Te2 O1 91.2(2) . 13_456 ?
O2 Te2 O1 88.8(2) 13_456 13_456 ?
O2 Te2 O1 91.2(2) 20_455 13_456 ?
O2 Te2 O1 88.8(2) 8_556 13_456 ?
O1 Te2 O1 180.0 . 13_456 ?
O2 Te2 Ce1 138.30(17) . 4_455 ?
O2 Te2 Ce1 41.70(17) 13_456 4_455 ?
O2 Te2 Ce1 138.30(17) 20_455 4_455 ?
O2 Te2 Ce1 41.70(17) 8_556 4_455 ?
O1 Te2 Ce1 89.7(2) . 4_455 ?
O1 Te2 Ce1 90.3(2) 13_456 4_455 ?
O2 Te2 Ce1 41.70(17) . 16_556 ?
O2 Te2 Ce1 138.30(17) 13_456 16_556 ?
O2 Te2 Ce1 41.70(17) 20_455 16_556 ?
O2 Te2 Ce1 138.30(17) 8_556 16_556 ?
O1 Te2 Ce1 90.3(2) . 16_556 ?
O1 Te2 Ce1 89.7(2) 13_456 16_556 ?
Ce1 Te2 Ce1 180.0 4_455 16_556 ?
O6A V1 O5 75.1(6) . 14_556 ?
O6A V1 O5 75.1(6) . 8_556 ?
O5 V1 O5 94.7(7) 14_556 8_556 ?
O6A V1 O5 107.4(7) . 19 ?
O5 V1 O5 32.3(8) 14_556 19 ?
O5 V1 O5 102.8(7) 8_556 19 ?
O6A V1 O5 107.4(7) . . ?
O5 V1 O5 102.8(7) 14_556 . ?
O5 V1 O5 32.3(8) 8_556 . ?
O5 V1 O5 92.9(7) 19 . ?
O6A V1 O6B 20.3(8) . . ?
O5 V1 O6B 88.6(6) 14_556 . ?
O5 V1 O6B 88.6(6) 8_556 . ?
O5 V1 O6B 119.7(6) 19 . ?
O5 V1 O6B 119.7(6) . . ?
O6A V1 O7 162.4(11) . . ?
O5 V1 O7 93.2(7) 14_556 . ?
O5 V1 O7 93.2(7) 8_556 . ?
O5 V1 O7 61.8(5) 19 . ?
O5 V1 O7 61.8(5) . . ?
O6B V1 O7 177.3(10) . . ?
O6A V1 O2 105.6(6) . 19 ?
O5 V1 O2 93.3(4) 14_556 19 ?
O5 V1 O2 171.8(4) 8_556 19 ?
O5 V1 O2 84.9(4) 19 19 ?
O5 V1 O2 146.0(4) . 19 ?
O6B V1 O2 90.0(6) . 19 ?
O7 V1 O2 87.9(6) . 19 ?
O6A V1 O2 105.6(6) . . ?
O5 V1 O2 171.8(4) 14_556 . ?
O5 V1 O2 93.3(4) 8_556 . ?
O5 V1 O2 146.0(4) 19 . ?
O5 V1 O2 84.9(4) . . ?
O6B V1 O2 90.0(6) . . ?
O7 V1 O2 87.9(6) . . ?
O2 V1 O2 78.6(3) 19 . ?
Te1 O1 Te1 67.5(3) 20_455 . ?
Te1 O1 Te2 118.5(3) 20_455 . ?
Te1 O1 Te2 118.5(3) . . ?
Te2 O2 V1 133.5(3) . . ?
Te2 O2 Ce1 109.1(2) . 16_556 ?
V1 O2 Ce1 112.0(2) . 16_556 ?
Te1 O3 Te1 67.9(4) . 20_455 ?
Te1 O3 Ce1 121.37(8) . . ?
Te1 O3 Ce1 121.37(8) 20_455 . ?
Te1 O3 Ce1 121.37(8) . 16_556 ?
Te1 O3 Ce1 121.37(8) 20_455 16_556 ?
Ce1 O3 Ce1 102.3(4) . 16_556 ?
O5 O5 V1 73.9(14) 8_556 15_556 ?
O5 O5 V1 73.8(14) 8_556 . ?
V1 O5 V1 141.6(7) 15_556 . ?
O6B O6A V1 112(3) . . ?
O6A O6B V1 47(3) . . ?
OW1A OW1B OW1A 180.0 16_556 4_554 ?
 
_refine_diff_density_max    2.987
_refine_diff_density_min   -1.432
_refine_diff_density_rms    0.303

_shelxl_version_number 2013-4

_shelx_res_file
;
REM Solution 1  R1  0.179  Rweak  0.003,  Alpha = 0.0381  in P6(3)/mmc
REM Formula:  O25 V12 Te3 Ce2
TITL save in P6(3)/mmc
CELL  0.71073  12.1658  12.1658  12.5367   90.000   90.000  120.000
ZERR    4.00   0.00510   0.00510   0.00530   0.0000   0.0000   0.0000
LATT  1
SYMM -Y, X-Y, Z
SYMM -X+Y, -X, Z
SYMM -X, -Y, 1/2+Z
SYMM Y, -X+Y, 1/2+Z
SYMM X-Y, X, 1/2+Z
SYMM Y, X, -Z
SYMM X-Y, -Y, -Z
SYMM -X, -X+Y, -Z
SYMM -Y, -X, 1/2-Z
SYMM -X+Y, Y, 1/2-Z
SYMM X, X-Y, 1/2-Z
SFAC O V TE CE
UNIT 80 12 12 4
TEMP -125.210
SHEL 999 0.800
L.S. 20
BOND
ACTA
ISOR 0.005 0.005 OW1A OW1B
LIST 6
FMAP 2
PLAN 20
DELU
WGHT    0.045900   38.882599
FVAR       0.12095
CE1   4   -0.333333    0.333333    0.092581    10.16667    0.00928    0.00928 =
         0.00977    0.00000    0.00000    0.00464
TE1   3   -0.396298    0.031323    0.250000    10.25000    0.01268    0.01033 =
         0.01449    0.00000    0.00000    0.00500
TE2   3   -0.500000    0.000000    0.500000    10.25000    0.00956    0.00869 =
         0.01093    0.00049    0.00025    0.00435
V1    2   -0.161768    0.161768    0.502971    10.50000    0.00943    0.00943 =
         0.05301    0.00637   -0.00637    0.00350
O1    1   -0.529468   -0.058936    0.352870    10.50000    0.01774    0.01079 =
         0.00854    0.00033    0.00016    0.00540
O2    1   -0.332183    0.126994    0.460612    11.00000    0.00655    0.01206 =
         0.02507    0.00614    0.00166    0.00201
O3    1   -0.408832    0.182336    0.250000    10.25000    0.03841    0.01190 =
         0.01506    0.00000    0.00000    0.00595
O4    1   -0.333333    0.333333   -0.110346    10.16667    0.02070    0.02070 =
         0.01095    0.00000    0.00000    0.01035
O5    1   -0.216154    0.001007    0.459906    10.50000    0.01440    0.01766 =
         0.05507    0.00227    0.00685    0.01085
O6A   1   -0.161794    0.161794    0.625046    10.25000    0.04818    0.04818 =
         0.04480    0.00760   -0.00760    0.04026
O6B   1   -0.193569    0.193569    0.647078    10.25000    0.04974    0.04974 =
         0.03707    0.00846   -0.00846    0.03370
O7    1   -0.133875    0.133875    0.355530    10.25000    0.03115    0.03115 =
         0.06592   -0.01188    0.01188    0.01153
OW1A  1    0.000000    0.000000    0.404114    10.16000    0.05302    0.05302 =
         0.06256    0.00000    0.00000    0.02651
OW1B  1    0.000000    0.000000    0.000000    10.00667    0.25783    0.25783 =
         0.25769    0.00000    0.00000    0.12891

HKLF 4

REM  save in P6(3)/mmc
REM R1 =  0.0389 for     605 Fo > 4sig(Fo)  and  0.0427 for all     658 data
REM     74 parameters refined using     39 restraints

END

WGHT      0.0459     38.8786

REM Highest difference peak  2.987,  deepest hole -1.432,  1-sigma level  0.303
Q1    1   0.0000  0.0000  0.3311  10.16667  0.05    2.99
Q2    1  -0.0679  0.2426  0.7500  10.50000  0.05    2.62
Q3    1   0.0685 -0.0685  0.2500  10.25000  0.05    1.91
Q4    1  -0.1697  0.1697  0.2500  10.25000  0.05    1.66
Q5    1  -0.3333  0.3333  0.0256  10.16667  0.05    1.49
Q6    1  -0.1674  0.1674  0.5468  10.50000  0.05    1.29
Q7    1  -0.3333  0.3333  0.1507  10.16667  0.05    1.13
Q8    1   0.0000  0.0000  0.2500  10.08333  0.05    1.06
Q9    1  -0.3864  0.2273 -0.2500  10.25000  0.05    1.06
Q10   1  -0.2393  0.2393  0.7500  10.25000  0.05    0.85
Q11   1  -0.5117 -0.0233  0.4232  10.50000  0.05    0.85
Q12   1  -0.2972  0.0896  0.2500  10.50000  0.05    0.83
Q13   1  -0.3860 -0.0454  0.2500  10.50000  0.05    0.76
Q14   1  -0.4451  0.2774  0.2500  10.25000  0.05    0.72
Q15   1  -0.4632 -0.0584  0.2500  10.50000  0.05    0.70
Q16   1  -0.4076  0.0276  0.1867  11.00000  0.05    0.69
Q17   1  -0.3333  0.3333 -0.0621  10.16667  0.05    0.67
Q18   1  -0.3333  0.3333 -0.2500  10.08333  0.05    0.66
Q19   1  -0.3333  0.3333  0.2500  10.08333  0.05    0.52
Q20   1  -0.5075 -0.0149  0.2500  10.25000  0.05    0.52
;
_shelx_res_checksum   82877

_shelx_hkl_file
;
   1   1   0  116.89    5.50
   1   1   0  105.39    5.70
   1   1   0  108.39    5.00
  -2   1   0  102.39    5.20
  -2   1   0  101.99    5.90
  -2   1   0  110.29    4.70
   1  -2   0   99.79    4.80
   1  -2   0   99.09    6.10
   1  -2   0  111.69    5.10
  -1   2   0   86.19    6.20
  -1  -1   0  104.29    5.00
  -1  -1   0  104.69    5.70
  -1  -1   0  108.29    5.50
   2  -1   0  104.29    5.10
   2  -1   0   98.49    5.90
   2  -1   0  112.59    4.70
   2  -1   0  100.59    5.20
  -2   2   0  945.21   37.20
  -2   2   0  980.90   35.20
   2   0   0  966.10   37.60
   0  -2   0  989.70   37.40
   2   0   0  911.61   37.90
  -2   2   0  969.60   34.90
   0  -2   0  917.61   34.20
   0  -2   0  858.51   35.10
   2   0   0  950.60   33.70
   0   2   0 1019.90   37.50
   0   2   0  924.31   35.20
   0   2   0  908.71   34.20
  -2   0   0  966.10   33.70
  -2   0   0  942.81   37.50
  -2   0   0  845.52   35.10
  -2   0   0  981.10   35.10
   2  -2   0  931.01   35.10
   2  -2   0  910.81   34.80
   2  -2   0  968.90   37.20
   0   2   0  968.80   37.40
  -2   0   0  940.11   38.00
   1   2   0  616.84   23.90
  -3   1   0  601.44   22.00
   2  -3   0  613.84   23.40
   1   2   0  579.74   22.30
   1   2   0  554.64   24.00
  -3   1   0  596.24   24.60
  -3   1   0  525.45   23.60
   2  -3   0  546.75   23.20
  -3   1   0  553.94   21.60
  -1  -2   0  605.24   22.40
  -2   3   0  638.24   24.10
  -2   3   0  624.84   22.10
  -1  -2   0  595.74   24.20
   3  -1   0  581.14   23.70
  -2   3   0  585.14   23.40
   3  -1   0  567.34   24.60
  -1  -2   0  548.15   23.80
   3  -1   0  596.64   22.10
   3  -1   0  593.44   21.60
   1  -3   0  529.75   23.50
   1  -3   0  565.44   22.60
   2   1   0  585.04   23.70
  -3   2   0  619.84   24.30
   2   1   0  607.04   22.10
  -3   2   0  540.25   23.30
   1  -3   0  547.95   21.90
   2   1   0  535.75   24.00
  -1   3   0  594.04   22.80
   3  -2   0  597.84   21.70
  -1   3   0  632.14   23.70
  -1   3   0  605.24   22.00
   3  -2   0  565.04   23.10
  -2  -1   0  582.04   22.10
  -2  -1   0  562.24   24.10
  -1   3   0  615.04   23.30
   3  -2   0  584.94   23.40
  -3   3   0   60.09    4.60
  -3   3   0   52.89    3.40
   0  -3   0   43.50    5.20
   3   0   0   72.49    5.50
   3   0   0   59.59    4.00
   3   0   0   57.59    3.50
   0  -3   0   61.39    4.20
   0  -3   0   52.69    4.30
   0   3   0   58.09    3.80
  -3   0   0   55.29    5.00
  -3   0   0   53.49    3.40
  -3   0   0   52.29    3.40
  -3   0   0   57.69    3.50
   0   3   0   61.19    3.50
   3  -3   0   57.59    3.30
   0   3   0   50.19    5.40
   1   3   0  480.35   19.90
  -4   1   0  515.75   19.60
  -4   1   0  513.65   22.30
   1   3   0  558.44   21.30
   4  -1   0  494.35   19.20
  -3   4   0  510.55   19.40
  -1  -3   0  503.95   21.70
   4  -1   0  504.55   21.20
  -3   4   0  529.95   21.60
   4  -1   0  501.55   19.70
  -3   4   0  504.75   21.80
   2   2   0 9910.71  370.86
   2  -4   0 9108.99  347.77
  -4   2   0 9583.44  347.67
   2   2   0 9357.56  348.17
  -4   2   0 9668.53  369.86
   2  -4   0 8699.43  370.16
  -2   4   0 9520.95  369.06
   4  -2   0 9175.18  370.46
  -2   4   0 9999.00  370.26
  -2  -2   0 9250.97  369.56
  -2   4   0 9797.52  348.47
  -2   4   0 9530.95  335.27
   4  -2   0 9657.43  333.57
   4  -2   0 9048.39  347.67
  -4   3   0  442.16   20.80
   3   1   0  502.85   21.30
  -4   3   0  517.05   22.00
   1  -4   0  553.64   21.40
  -3  -1   0  490.25   22.10
  -3  -1   0  525.35   20.10
   4  -3   0  511.85   20.90
  -1   4   0  507.15   21.10
  -1   4   0  537.55   21.50
  -1   4   0  517.25   19.80
   4  -3   0  518.35   19.80
  -1   4   0  524.85   20.90
  -4   4   0    5.50    1.10
  -4   4   0    7.60    2.40
   0  -4   0   10.30    3.70
   4   0   0    6.10    1.80
   4   0   0    6.90    2.00
   0  -4   0    4.40    2.40
  -4   4   0    4.50    1.50
   0   4   0    9.50    3.80
  -4   0   0    0.60    2.60
   4  -4   0    6.30    2.20
   0   4   0    4.50    1.70
  -4   0   0    6.00    2.00
  -4   0   0    6.40    1.70
   0   4   0    4.60    1.50
   4  -4   0    6.00    1.40
   4  -4   0    4.80    1.10
   1   4   0  266.47   12.30
  -5   1   0  271.97   13.90
  -5   1   0  273.47   11.00
   1   4   0  259.27   11.40
  -4   5   0  271.57   10.70
  -4   5   0  262.47   12.60
  -1  -4   0  251.47   12.90
   5  -1   0  260.67   12.20
   5  -1   0  259.77   11.10
  -5   2   0   -2.50    2.80
   2   3   0   -1.60    2.00
   2   3   0    0.90    1.50
  -5   2   0    0.80    1.20
  -3   5   0    0.10    1.40
   5  -2   0   -0.30    1.90
  -3   5   0    2.90    2.30
   5  -2   0    0.50    1.70
   5  -2   0   -2.00    1.60
  -3   5   0   -1.30    3.90
  -2  -3   0    2.10    2.50
  -5   3   0    1.10    2.60
   3   2   0    0.90    1.40
   3   2   0    2.90    2.30
  -2   5   0   -0.70    1.70
  -2   5   0    1.90    4.10
  -2   5   0    2.50    2.00
  -3  -2   0    1.90    2.80
   5  -3   0   -1.00    2.00
  -2   5   0    0.20    1.40
   5  -3   0   -1.90    1.40
   4   1   0  253.27   12.30
  -5   4   0  276.47   13.20
  -4  -1   0  268.17   11.50
  -1   5   0  267.47   11.30
   5  -4   0  254.57   11.70
  -4  -1   0  237.68   13.40
   5  -4   0  273.37   12.00
  -1   5   0  271.47   12.50
  -1   5   0  261.57   14.20
  -1   5   0  269.07   11.80
  -5   5   0    0.20    2.50
  -5   5   0    1.50    1.20
   5   0   0   -0.70    2.10
   5   0   0    1.30    2.00
  -5   0   0    0.60    1.60
   0   5   0    3.20    4.70
  -5   0   0    0.30    3.60
   0   5   0    0.70    1.70
   0   5   0    0.70    2.10
   5  -5   0    0.50    2.30
  -6   1   0  502.45   19.40
   1   5   0  488.35   21.20
   1   5   0  465.95   19.80
   5  -6   0  474.65   20.20
  -6   1   0  494.25   23.00
   6  -1   0  501.25   19.30
  -5   6   0  492.75   21.80
  -5   6   0  505.55   19.10
  -1  -5   0  467.15   22.00
   6  -1   0  510.35   21.40
  -6   2   0    9.80    1.80
   2   4   0   19.50    3.10
  -6   2   0    7.80    3.60
   2   4   0   11.90    2.80
   6  -2   0    9.20    2.80
  -4   6   0   11.80    2.10
   6  -2   0   11.80    2.50
  -2  -4   0   11.70    3.50
  -4   6   0   11.50    2.90
  -6   3   0   33.60    5.70
   3   3   0   37.00    3.50
   3   3   0   32.50    4.70
  -3   6   0   48.70    4.20
  -3  -3   0   37.40    6.30
   6  -3   0   40.60    4.20
  -3   6   0   37.20    4.60
   6  -3   0   34.40    4.60
  -3   6   0   46.50    7.50
  -3   6   0   35.60    3.60
  -6   4   0   10.60    3.40
   4   2   0   11.60    2.90
   6  -4   0    7.30    2.90
  -2   6   0   14.80    3.00
  -2   6   0    8.80    2.10
  -2   6   0   12.10    2.50
   6  -4   0    9.60    2.30
  -2   6   0   12.00    5.20
  -4  -2   0   12.80    2.60
  -4  -2   0    8.90    3.60
  -6   5   0  494.55   22.30
   5   1   0  488.75   21.30
   6  -5   0  493.95   20.60
   6  -5   0  496.65   20.30
  -1   6   0  481.85   20.70
  -1   6   0  491.05   21.60
  -1   6   0  501.85   22.70
  -5  -1   0  487.45   19.80
  -1   6   0  479.05   19.70
  -5  -1   0  483.95   22.90
   6   0   0 4336.37  173.58
   0  -6   0 4317.27  173.68
   6   0   0 4359.06  155.78
  -6   6   0 4641.84  173.78
   0   6   0 4418.26  157.78
   6  -6   0 4213.68  172.78
   6  -6   0 4406.76  157.38
   0   6   0 4196.18  173.08
  -6   0   0 4384.26  174.68
   0   6   0 4395.06  162.98
  -6   0   0 4614.24  162.88
   1   6   0  160.98    8.60
  -7   1   0  171.28    8.30
   1   6   0  161.88    9.50
   6  -7   0  160.88   10.10
  -7   1   0  178.68   12.00
  -1  -6   0  158.98   11.10
  -6   7   0  166.98   10.20
   7  -1   0  163.48    9.70
   7  -1   0  167.08    8.90
  -6   7   0  175.08    7.70
   2   5   0   92.39    7.40
  -7   2   0   87.49    9.20
   2   5   0   89.39    5.90
   5  -7   0   95.09    7.50
  -7   2   0   92.99    5.30
  -2  -5   0   87.49    8.70
  -5   7   0   96.79    7.30
   7  -2   0   93.19    6.80
   7  -2   0   90.49    6.90
  -5   7   0   93.89    5.50
   3   4   0  203.98    9.70
  -7   3   0  204.88    8.90
  -7   3   0  208.98   12.20
   3   4   0  212.38   11.20
   7  -3   0  202.48   10.40
  -3  -4   0  202.68   12.50
  -4   7   0  217.08    9.40
   7  -3   0  218.78   10.70
   4   3   0  202.08    9.40
   4   3   0  207.18   10.90
  -7   4   0  204.48   12.10
  -3   7   0  200.08   14.50
  -3   7   0  202.58   10.80
   7  -4   0  206.68   10.20
  -3   7   0  199.28    9.30
  -3   7   0  214.68   10.00
   7  -4   0  193.18   10.40
  -4  -3   0  184.48   12.20
  -7   5   0   83.69    8.20
   5   2   0   93.89    7.50
  -2   7   0   87.59    7.20
  -2   7   0   91.39    5.90
  -5  -2   0   89.79    6.30
   7  -5   0   77.19    6.90
  -5  -2   0   74.79    9.00
   7  -5   0   90.79    6.30
  -2   7   0   94.29    6.40
   6   1   0  159.78    9.50
   1  -7   0  154.68   10.40
  -7   6   0  172.28   10.60
  -6  -1   0  161.28    8.60
  -1   7   0  170.68    9.10
  -1   7   0  156.38   14.00
  -6  -1   0  157.48   11.70
   7  -6   0  164.98    9.80
   7  -6   0  165.88    8.80
  -1   7   0  154.08    8.40
  -7   7   0    4.30    3.80
   0  -7   0    1.80    4.70
   7   0   0   -1.10    3.10
   7   0   0   -1.20    3.10
  -7   0   0    1.10    2.60
   0   7   0    0.70    2.40
   0   7   0    6.90    7.00
   0   7   0    0.00    3.20
  -7   0   0   -1.50    4.90
   7  -7   0    4.00    3.80
  -8   1   0   42.90    5.10
  -8   1   0   40.90    7.50
   7  -8   0   29.80    6.10
   1   7   0   29.90    4.50
   1   7   0   33.00    4.80
  -7   8   0   39.50    4.30
  -1  -7   0   34.60    5.90
   8  -1   0   27.60    4.70
   8  -1   0   41.70    6.90
  -7   8   0   29.70    5.80
  -8   2   0   -2.00    2.30
   2   6   0    4.70    3.80
   6  -8   0   -0.20    4.20
   2   6   0   -0.10    2.50
  -8   2   0    1.30    4.50
  -6   8   0    1.60    2.40
   8  -2   0   -0.10    3.40
  -6   8   0    8.10    3.70
  -2  -6   0   -2.70    4.80
   8  -2   0    0.50    3.60
   5  -8   0   65.19    7.50
  -8   3   0   61.49    4.60
  -8   3   0   66.39    9.00
   3   5   0   57.69    7.10
   3   5   0   56.79    5.30
  -5   8   0   54.19    6.70
  -5   8   0   69.59    5.10
   8  -3   0   61.29    6.80
  -3  -5   0   55.99    8.80
   8  -3   0   69.99    7.30
   4   4   0 4083.69  152.98
  -8   4   0 3927.21  163.88
   4   4   0 4130.49  163.18
   8  -4   0 4137.89  147.39
  -4  -4   0 3964.40  163.88
  -4   8   0 4279.17  152.48
  -4   8   0 4235.38  162.98
   8  -4   0 4119.99  162.68
  -8   5   0   64.59    8.30
   5   3   0   70.39    7.10
   8  -5   0   53.19    7.10
  -5  -3   0   61.59    6.50
  -3   8   0   61.49    5.60
  -3   8   0   62.39    6.20
  -5  -3   0   53.09    7.70
  -3   8   0   58.09    7.00
   8  -5   0   67.79    6.20
   6   2   0    8.10    4.20
  -8   6   0    4.00    4.30
  -2   8   0    3.50    3.10
  -2   8   0   -0.60    3.60
  -6  -2   0   -0.60    5.30
  -6  -2   0    3.60    3.10
  -2   8   0    2.00    2.80
   8  -6   0   -5.30    3.60
   8  -6   0   -0.90    2.80
   7   1   0   30.80    4.90
   1  -8   0   37.90    6.20
  -8   7   0   32.90    6.00
   8  -7   0   29.60    4.20
  -7  -1   0   29.10    3.90
   8  -7   0   32.80    5.80
  -1   8   0   40.40    6.60
  -1   8   0   33.30    5.40
  -7  -1   0   36.80    7.00
  -8   8   0    3.80    4.80
   8   0   0    2.90    3.80
   0  -8   0   12.70    5.40
   8   0   0    5.00    4.00
  -8   0   0   -1.20    6.10
  -8   0   0    0.30    3.20
   0   8   0   -2.00    3.80
   8  -8   0    2.90    4.40
   0   8   0    8.30    3.60
  -9   1   0  170.88   15.60
  -9   1   0  171.68    9.60
   1   8   0  167.28   10.80
   1   8   0  146.19   10.10
   8  -9   0  177.98   12.50
  -8   9   0  160.18   12.40
   9  -1   0  156.58   10.40
   9  -1   0  166.98   11.20
  -1  -8   0  178.28   14.40
  -9   2   0  248.68   11.70
   7  -9   0  242.58   14.80
   2   7   0  232.58   12.40
  -9   2   0  254.97   17.60
   2   7   0  277.07   13.80
  -7   9   0  242.88   14.90
   9  -2   0  248.18   13.00
  -2  -7   0  269.67   16.30
  -7   9   0  249.28   11.40
   9  -2   0  242.88   14.00
   3   6   0    0.40    4.00
  -9   3   0    3.80    2.60
   6  -9   0   -1.10    4.90
   3   6   0    4.10    3.00
  -9   3   0    4.40    6.30
  -3  -6   0    6.70    5.70
  -6   9   0   13.00    4.60
   9  -3   0    5.40    3.90
   9  -3   0    1.60    4.30
   4   5   0   87.29    8.90
  -9   4   0   89.59   11.40
   5  -9   0   83.69    9.10
   4   5   0   87.49    7.00
   5  -9   0  103.59    6.90
  -9   4   0   88.19    5.80
   9  -4   0  101.09    8.40
  -4  -5   0   81.99   11.20
  -5   9   0   91.09    9.40
   9  -4   0  104.89    9.30
  -5   9   0   83.99    6.50
   5   4   0   93.29    8.70
  -9   5   0   79.49   11.20
   4  -9   0  102.49    9.30
  -4   9   0   80.29    8.50
  -4   9   0   83.59    6.80
   9  -5   0   97.19    8.10
   9  -5   0   75.89    8.70
  -5  -4   0   95.09   11.30
  -5  -4   0   95.99    8.00
   6   3   0    2.70    4.00
  -9   6   0    0.50    5.70
  -3   9   0    2.70    3.60
  -3   9   0    4.00    3.20
   9  -6   0    2.60    3.40
  -3   9   0    4.10    4.10
  -6  -3   0    3.40    3.60
   9  -6   0    1.30    4.50
  -6  -3   0   -0.50    5.70
   7   2   0  221.98   14.20
  -9   7   0  230.28   15.50
   9  -7   0  254.77   14.20
  -7  -2   0  256.67   12.70
   9  -7   0  239.68   12.90
  -2   9   0  270.77   13.40
  -7  -2   0  286.17   17.70
  -2   9   0  249.08   12.70
   1  -9   0  151.68   13.10
  -9   8   0  162.78   12.60
   8   1   0  157.98   11.50
  -8  -1   0  138.99   15.70
   9  -8   0  174.28   12.30
   9  -8   0  172.78   10.50
  -8  -1   0  145.59    9.60
  -1   9   0  165.28   10.10
  -1   9   0  160.98   10.60
   9   0   0   76.19    9.10
   0  -9   0   70.89   11.20
  -9   9   0   68.69   10.00
   9  -9   0   64.79    9.50
   0   9   0   52.29    8.40
  -9   0   0   58.59   10.40
   0   9   0   55.39    6.70
  -9   0   0   59.09    7.40
   9 -10   0   13.20    6.60
 -10   1   0   21.00    4.60
 -10   1   0   18.00    9.30
   1   9   0   18.20    4.80
   1   9   0   28.30    5.90
  -9  10   0   18.60    6.50
  10  -1   0   17.10    5.70
  -1  -9   0    9.00    8.40
  10  -1   0   19.90    5.70
   2   8   0 2210.68   89.99
 -10   2   0 2336.37   83.79
   8 -10   0 2294.17   83.49
 -10   2   0 2164.88   92.89
   2   8   0 2153.88   84.79
  10  -2   0 2258.27   81.59
  -2  -8   0 2146.39   91.99
  -8  10   0 2254.17   83.29
  10  -2   0 2198.08   90.29
  -8  10   0 2228.88   91.29
 -10   3   0   34.10    5.50
   3   7   0   33.70    6.10
 -10   3   0   33.30    8.80
   7 -10   0   23.60    6.50
   3   7   0   30.80    4.70
  -7  10   0   31.60    4.00
  -7  10   0   55.19    8.80
  -3  -7   0   25.40    7.70
  10  -3   0   32.90    5.90
  10  -3   0   37.20    6.00
   6 -10   0   39.60    6.90
   4   6   0   40.20    6.30
   4   6   0   34.80    5.60
 -10   4   0   45.20    8.50
 -10   4   0   35.10    5.20
  -4  -6   0   42.30    8.30
  10  -4   0   30.90    6.00
  -6  10   0   41.20    7.20
  10  -4   0   38.50    5.70
   5   5   0  771.52   34.40
   5 -10   0  791.92   32.50
 -10   5   0  748.63   36.70
  -5  -5   0  753.02   36.70
  10  -5   0  802.62   34.10
  10  -5   0  807.12   32.50
  -5  10   0  850.21   31.50
  -5  10   0  801.62   35.10
  -5  -5   0  747.13   32.60
   4 -10   0   37.10    6.50
   6   4   0   38.60    6.00
 -10   6   0   43.40    8.40
  -6  -4   0   43.80    8.70
  -4  10   0   37.80    7.30
  10  -6   0   37.40    5.60
  -4  10   0   40.80    6.50
  -4  10   0   41.40    5.20
  -6  -4   0   34.40    5.60
 -10   7   0   38.60    7.80
   7   3   0   25.70    5.40
   3 -10   0   23.90    6.30
  -3  10   0   47.90    7.80
  -3  10   0   32.50    5.10
  10  -7   0   30.30    6.40
  -7  -3   0   29.20    5.20
  -3  10   0   31.00    6.90
  10  -7   0   33.20    5.10
  -7  -3   0   31.20    8.80
   8   2   0 2243.88   90.99
   2 -10   0 2188.88   82.09
 -10   8   0 2100.89   91.79
   2 -10   0 2155.08   91.69
  -2  10   0 2412.36   85.19
  -2  10   0 2294.47   89.79
  -8  -2   0 2283.17   93.39
  10  -8   0 2223.98   83.39
  -8  -2   0 2234.58   84.89
  10  -8   0 2179.58   89.59
   1 -10   0   16.00    5.80
 -10   9   0   22.60    7.00
   1 -10   0   13.90    7.80
  -1  10   0    8.60    5.30
  10  -9   0   11.90    6.40
  -1  10   0   19.00    5.20
  -9  -1   0   22.80    4.80
  -9  -1   0   27.70    9.70
  10   0   0   34.10    6.50
 -10  10   0   34.00    8.10
  10   0   0   41.10    7.00
   0 -10   0   33.40    9.40
 -10   0   0   33.80   10.70
   0  10   0   28.40    5.90
   0  10   0   29.60    6.60
  10 -10   0   36.30    7.70
 -10   0   0   37.10    5.30
 -11   1   0   53.29    6.60
 -11   1   0   53.29   12.00
   1  10   0   61.89    9.10
   1  10   0   51.79    7.50
  10 -11   0   54.49    8.70
 -10  11   0   49.30    9.40
  11  -1   0   50.39    8.00
  11  -1   0   65.29   11.00
  -1 -10   0   47.90   11.10
 -11   2   0  115.89    8.70
   9 -11   0  127.79   12.90
   2   9   0  109.69   11.00
   2   9   0  101.59    9.90
 -11   2   0  142.89   17.00
  11  -2   0  100.39   11.70
  -9  11   0  100.09   12.80
  -2  -9   0  100.79   16.00
  -9  11   0  103.89    8.00
  11  -2   0  111.79   11.40
   3   8   0  124.59   10.00
   8 -11   0  152.98   13.30
 -11   3   0  148.49    9.10
   3   8   0  150.58   11.70
 -11   3   0  136.89   16.10
  11  -3   0  144.19   12.20
  -3  -8   0  144.69   16.10
  11  -3   0  144.89   11.90
  -8  11   0  113.69    8.70
  -8  11   0  153.38   13.00
   4   7   0    2.30    5.80
 -11   4   0    9.20    3.70
 -11   4   0   18.20    8.30
   7 -11   0    4.30    6.60
  -7  11   0   10.00    6.40
  11  -4   0    7.20    6.20
  11  -4   0    8.90    5.90
  -4  -7   0    9.90    8.60
  -7  11   0    7.40    4.10
 -11   5   0  377.86   24.00
   6 -11   0  411.66   21.40
   5   6   0  418.26   21.20
  -6  11   0  418.86   21.90
  11  -5   0  417.66   20.60
  11  -5   0  419.26   20.80
  -5  -6   0  392.46   20.10
  -6  11   0  430.26   18.30
  -5  -6   0  409.76   24.50
   6   5   0  403.86   20.90
   5 -11   0  415.76   21.00
 -11   6   0  414.86   23.60
  -6  -5   0  396.26   19.80
  11  -6   0  437.56   20.40
  -6  -5   0  355.96   24.20
  -5  11   0  380.56   21.60
  11  -6   0  391.36   20.70
  -5  11   0  432.56   18.50
 -11   7   0   10.30    7.20
   7   4   0    5.50    5.40
   4 -11   0    8.90    6.10
  -4  11   0    2.00    5.00
  -7  -4   0    9.10    8.80
  -7  -4   0    8.50    5.10
  11  -7   0    6.50    5.10
  11  -7   0   13.30    6.60
  -4  11   0   13.50    4.90
  -4  11   0    7.10    6.80
 -11   8   0  124.29   14.70
   3 -11   0  151.88   14.40
   3 -11   0  130.79   12.80
   8   3   0  146.79   11.90
  -8  -3   0  151.88   10.70
  11  -8   0  146.19   11.20
  -3  11   0  144.69   10.70
  11  -8   0  163.68   13.20
  -8  -3   0  119.39   17.30
  -3  11   0  116.79   10.60
   9   2   0  114.19   11.90
   2 -11   0   97.49   15.10
   2 -11   0  109.89   12.60
 -11   9   0  116.29   12.90
  11  -9   0  114.19   10.90
  -9  -2   0  114.99   10.20
  -2  11   0  102.79   10.50
  -9  -2   0  103.59   13.80
  11  -9   0  116.09   12.80
  -2  11   0  112.49   10.30
   1 -11   0   58.19    8.00
 -11  10   0   60.79    8.80
   1 -11   0   42.10    9.30
  10   1   0   34.90    7.60
  11 -10   0   54.49    8.50
 -10  -1   0   58.99   11.40
  -1  11   0   50.09    7.30
  -1  11   0   59.09    7.10
 -10  -1   0   61.49    9.40
 -11  11   0  456.55   25.50
  11   0   0  419.86   24.40
   0 -11   0  449.66   27.40
   0  11   0  460.75   23.10
  11 -11   0  479.35   24.50
 -11   0   0  485.15   29.70
 -11   0   0  487.45   21.40
   0  11   0  467.75   22.10
   1  11   0   44.20    7.30
 -12   1   0   52.09    7.20
   1  11   0   51.09    8.70
  11 -12   0   50.89    9.70
 -12   1   0   57.49   13.00
  12  -1   0   34.60    8.00
  12  -1   0   40.10    9.30
  -1 -11   0   53.09   13.00
 -11  12   0   22.10    9.60
   2  10   0   51.99    7.30
 -12   2   0   44.20    6.50
 -12   2   0   66.79   11.80
   2  10   0   58.09    7.60
  10 -12   0   50.79    9.40
  12  -2   0   56.89    8.10
 -10  12   0   52.09    9.80
  12  -2   0   50.49    8.60
  -2 -10   0   41.50   12.10
   3   9   0   88.49   11.60
   3   9   0   79.29    9.40
   9 -12   0   88.49   13.40
 -12   3   0   86.19    8.80
 -12   3   0   83.39   12.60
  12  -3   0   74.99   12.00
  -3  -9   0   83.09   12.60
  -9  12   0   63.39    8.40
  12  -3   0   69.99    9.30
  -9  12   0   91.89   12.80
   8 -12   0   89.89   10.60
 -12   4   0   99.79    8.40
   4   8   0  106.59   11.70
 -12   4   0  101.39   16.80
  -4  -8   0   86.99   12.50
  12  -4   0   96.99   12.10
  12  -4   0   95.89   12.50
  -4  -8   0   93.39   13.60
  -8  12   0   98.79    9.00
  -8  12   0   90.39   13.20
   7 -12   0   30.40    7.70
   5   7   0   17.60    6.90
 -12   5   0   17.60   10.00
  -5  -7   0   25.90    7.10
  -5  -7   0   27.20   10.70
  12  -5   0   28.00    7.50
  -7  12   0   17.40    7.40
  12  -5   0   12.20    6.30
  -7  12   0   30.50    5.40
 -12   6   0 1995.20   89.49
   6 -12   0 2164.18   80.69
   6   6   0 2090.69   87.39
  -6  -6   0 2092.59   90.39
  -6  12   0 2191.58   81.09
  12  -6   0 2218.18   80.69
  -6  -6   0 2120.19   82.79
  -6  12   0 2131.89   88.29
  12  -6   0 2187.48   87.19
   7   5   0   19.30    6.50
   5 -12   0   27.90    8.10
 -12   7   0   14.60    8.80
  -5  12   0   10.00    7.90
  -7  -5   0   16.80    6.30
  -5  12   0   21.30    5.60
  12  -7   0   16.00    6.60
  12  -7   0   18.90    7.70
  -7  -5   0   28.40   11.10
 -12   8   0  110.39   14.70
   8   4   0   78.49   12.10
   4 -12   0   80.59   10.10
  12  -8   0   92.79   11.50
  -8  -4   0   88.69   13.60
  -4  12   0  107.39   10.30
  12  -8   0   89.99   14.10
  -8  -4   0  103.99   10.90
  -4  12   0   94.39   13.70
  -4  12   0   89.59   10.70
 -12   9   0   88.99   14.10
   3 -12   0   71.29    9.50
   9   3   0  107.99   12.00
   3 -12   0   73.29   12.00
  12  -9   0   72.29   11.30
  -3  12   0   67.79   10.10
  -3  12   0   77.99   10.50
  -9  -3   0   76.89   13.10
  -9  -3   0   64.19   10.40
  12  -9   0  104.79   13.90
  10   2   0   54.59    8.20
   2 -12   0   56.69   11.00
 -12  10   0   54.49   10.10
   2 -12   0   49.50    8.30
 -10  -2   0   52.79    7.30
 -10  -2   0   60.09   13.10
  -2  12   0   32.60    7.30
  12 -10   0   64.09   10.30
  -2  12   0   64.09   10.60
  12 -10   0   48.60    7.10
 -12  11   0   37.40    9.90
  11   1   0   37.60    8.90
   1 -12   0   59.59   11.60
  -1  12   0   32.80    7.60
 -11  -1   0   51.69    7.50
 -11  -1   0   23.90   12.30
  12 -11   0   51.69   10.30
 -12  12   0 1082.09   49.70
   0 -12   0 1088.29   52.29
  12   0   0 1056.69   48.40
  12 -12   0 1169.08   46.90
   0  12   0 1021.80   46.80
 -12   0   0  992.60   52.49
 -12   0   0 1134.79   43.90
   0  12   0 1106.19   44.90
 -13   1   0   34.20   13.70
  12 -13   0   19.40   10.50
   1  12   0    1.70    6.50
 -13   1   0   17.40    6.80
   1  12   0   21.20    8.50
 -12  13   0  -14.90    9.50
  -1 -12   0   -5.50   12.90
  13  -1   0   -5.00    9.00
  11 -13   0    7.90    9.00
   2  11   0    3.40    6.40
   2  11   0   -3.20    7.80
 -13   2   0   19.00   12.10
 -13   2   0   -4.90    6.10
  13  -2   0    7.30    9.60
  13  -2   0    3.90    7.80
 -11  13   0   16.60    9.80
  -2 -11   0   23.10   13.50
 -13   3   0  190.48   22.00
   3  10   0  162.08   15.20
  10 -13   0  217.48   18.10
 -13   3   0  181.88   12.80
  -3 -10   0  164.58   22.60
  13  -3   0  207.68   16.80
 -10  13   0  194.58   17.40
  13  -3   0  215.08   16.30
  -3 -10   0  192.98   17.20
 -13   4   0  120.49   19.80
   4   9   0  110.19   13.90
 -13   4   0  126.69    9.80
   9 -13   0  140.39   15.90
  13  -4   0  127.39   15.30
  -9  13   0  128.69   10.70
  13  -4   0  131.19   14.10
  -4  -9   0  137.19   20.80
  -4  -9   0  109.59   14.70
  -9  13   0  101.29   14.90
   5   8   0   -1.70    6.90
 -13   5   0   -5.10   10.20
   8 -13   0    9.20    8.60
  -5  -8   0    0.20   11.20
  13  -5   0    6.30    7.40
  -8  13   0   -2.40    7.70
  -5  -8   0    3.50    7.00
  -8  13   0    5.50    5.40
  13  -5   0   -3.10    8.30
 -13   6   0   33.80   11.10
   7 -13   0   54.69   10.10
   6   7   0   56.79    8.30
  -7  13   0   43.30    8.90
  13  -6   0   36.70    8.00
  -6  -7   0   32.20    7.80
  13  -6   0   48.40    9.90
  -6  -7   0   45.50   13.30
   7   6   0   37.50    8.10
 -13   7   0   40.20   10.20
   6 -13   0   56.19    9.50
  -7  -6   0   71.29   13.60
  -7  -6   0   43.20    8.40
  -6  13   0   42.80    7.10
  13  -7   0   55.79    8.10
  13  -7   0   35.00    9.70
  -6  13   0   38.40   10.60
 -13   8   0   23.40   10.00
   8   5   0    2.00    6.70
   5 -13   0   -0.30    8.00
  -8  -5   0    5.90   11.80
  -5  13   0  -13.40    8.10
  13  -8   0   -5.20    8.30
  -8  -5   0    1.60    6.90
  13  -8   0   -3.10    7.00
  -5  13   0    5.00    6.10
 -13   9   0   96.19   16.50
   4 -13   0  119.99   14.90
   9   4   0   89.19   14.20
  -9  -4   0  137.29   21.30
  13  -9   0  115.09   13.50
  -4  13   0  131.69   12.10
  13  -9   0  102.49   13.40
  -9  -4   0   97.79   12.00
  -4  13   0  106.69   11.90
   3 -13   0  169.98   16.50
  10   3   0  211.98   16.00
 -13  10   0  164.98   17.80
   3 -13   0  161.08   20.30
  -3  13   0  182.78   13.80
 -10  -3   0  192.78   13.90
 -10  -3   0  150.68   24.10
  13 -10   0  159.38   18.50
  -3  13   0  162.58   13.70
  11   2   0   -0.50    7.70
   2 -13   0   -8.70   10.70
 -13  11   0    0.00    8.90
  -2  13   0    4.80    6.80
  13 -11   0    6.20    9.00
 -11  -2   0   -8.20    7.00
  -2  13   0    8.50    6.90
 -11  -2   0   26.10   13.70
   1 -13   0    8.20   13.80
 -13  12   0    6.80   10.10
  12   1   0   17.10    8.60
  13 -12   0   13.60   10.20
  -1  13   0   11.30    7.40
 -12  -1   0   12.80    7.50
  -1  13   0    5.20    7.20
 -12  -1   0   17.40   14.40
 -13  13   0   22.50   11.60
  13   0   0   41.90   10.40
   0 -13   0   26.70   15.30
   0  13   0   28.40    9.20
  13 -13   0   66.89   12.70
 -13   0   0   43.00   15.20
   0  13   0   31.20    8.50
 -14   1   0   83.59   10.60
  13 -14   0  133.99   20.40
 -14   1   0  114.99   19.20
   1  13   0   80.29   11.60
  14  -1   0   82.39   13.10
  -1 -13   0   96.39   18.90
  -1 -13   0   96.09   14.80
 -13  14   0  113.99   18.80
   2  12   0   -3.70   10.20
  12 -14   0   21.10   11.70
 -14   2   0    7.60   14.00
 -12  14   0   18.50   11.30
  -2 -12   0   -2.20   14.70
  -2 -12   0    0.60   10.80
 -14   3   0    1.50   12.90
  11 -14   0   43.80   11.10
   3  11   0   36.50    9.20
 -11  14   0   35.10   10.90
  14  -3   0   39.00    9.90
  -3 -11   0   40.70   15.90
  -3 -11   0   32.90   10.60
  14  -3   0   38.70   12.30
   4  10   0 1421.96   65.49
  10 -14   0 1628.64   63.19
 -14   4   0 1502.65   70.29
  14  -4   0 1547.75   66.09
 -10  14   0 1591.04   68.29
  14  -4   0 1607.04   61.09
  -4 -10   0 1639.34   64.09
  -4 -10   0 1464.15   70.49
   9 -14   0  103.89   13.30
 -14   5   0   85.39   15.60
   5   9   0   91.79   14.30
  -5  -9   0  117.09   15.40
  -5  -9   0  101.89   16.20
  14  -5   0  111.99   16.70
  -9  14   0  128.79   12.20
  -9  14   0  114.69   16.20
  14  -5   0  121.09   15.40
 -14   6   0   63.09   13.60
   6   8   0   65.79    9.20
   8 -14   0   65.69   11.50
  -8  14   0   65.29   11.70
  -6  -8   0   88.29   13.70
  -8  14   0   72.69   11.60
  14  -6   0   62.09    9.90
  -6  -8   0   61.29   15.30
  14  -6   0   60.79   11.30
   7 -14   0    6.10    9.70
 -14   7   0    4.90   11.50
   7   7   0    8.70    7.90
  -7  -7   0   39.80   14.00
  -7  14   0    1.60    6.80
  -7  14   0  -16.10    9.70
  14  -7   0    9.20    9.70
  -7  -7   0    5.30    8.30
  14  -7   0   -5.60    8.10
 -14   8   0   80.49   13.20
   6 -14   0   80.69   12.10
   8   6   0   78.89   13.50
  -8  -6   0   97.49   16.50
  -6  14   0   71.09   12.50
  -6  14   0   83.49   12.50
  -8  -6   0   71.19   10.10
  14  -8   0   66.39   11.90
  14  -8   0   55.29    9.60
   5 -14   0   96.89   13.60
   9   5   0  106.69   14.00
 -14   9   0   89.09   13.90
   5 -14   0  101.49   12.80
  -9  -5   0   95.29   16.30
  14  -9   0  104.39   13.10
  -5  14   0   91.69   10.10
  -9  -5   0   83.19   10.30
  14  -9   0   87.99   15.10
   4 -14   0 1474.45   68.49
 -14  10   0 1403.56   67.29
   4 -14   0 1549.05   60.89
  10   4   0 1422.46   65.39
 -10  -4   0 1598.04   61.29
  14 -10   0 1564.54   64.79
 -10  -4   0 1460.35   70.89
  -4  14   0 1493.45   63.59
  14 -10   0 1657.53   62.89
  -4  14   0 1638.54   61.09
 -14  11   0   40.70   11.10
  11   3   0    9.90    9.10
   3 -14   0   22.90   12.90
  -3  14   0   40.50    8.80
  14 -11   0   38.50   11.90
 -11  -3   0   22.80    8.80
 -11  -3   0   66.39   16.30
  -3  14   0   29.30    8.10
   2 -14   0   20.20   13.70
 -14  12   0    3.20   10.70
  12   2   0   20.80    9.50
 -12  -2   0   -4.00   15.50
  14 -12   0  -16.10   11.10
  -2  14   0   -8.70    7.80
 -12  -2   0    7.50    8.20
  -2  14   0   -4.00    7.50
 -14  13   0   90.19   14.50
  13   1   0  101.29   17.00
   1 -14   0   83.09   18.50
 -13  -1   0   90.19   18.70
  14 -13   0   75.09   14.60
  -1  14   0   75.99   10.80
 -13  -1   0   96.69   14.50
  -1  14   0   90.39   11.10
   4  11   0   16.00    9.20
  11 -15   0   10.00   11.30
 -15   4   0  -12.40   14.30
  -4 -11   0    7.30   16.80
 -11  15   0  -11.60   10.90
  15  -4   0   15.00   10.40
  -4 -11   0   -6.40   10.40
   5  10   0   60.69   10.40
 -15   5   0   65.89   15.60
  10 -15   0   72.89   13.20
 -10  15   0  111.69   17.70
  -5 -10   0   71.49   12.20
  -5 -10   0   89.69   17.60
  15  -5   0   55.19   10.80
  15  -5   0   75.59   13.80
 -15   6   0  106.89   17.10
   6   9   0   80.79   11.50
   9 -15   0  109.19   14.60
  15  -6   0  128.19   19.50
  -9  15   0  105.99   14.20
  15  -6   0   79.79   11.30
  -6  -9   0  110.49   13.70
  -6  -9   0  100.39   18.10
   8 -15   0  112.69   14.80
 -15   7   0   86.89   15.30
   7   8   0   85.59   15.00
  15  -7   0  132.99   18.80
  -8  15   0   92.59   14.80
  15  -7   0  118.99   17.10
  -7  -8   0  112.59   15.60
  -8  15   0  119.89   13.80
   7 -15   0  105.39   14.40
 -15   8   0  155.98   21.60
   8   7   0   96.19   15.30
  -8  -7   0  121.29   16.10
  15  -8   0  106.89   14.90
  -8  -7   0  135.49   19.70
  15  -8   0   90.99   12.00
  -7  15   0  116.89   15.50
  -7  15   0   94.59   14.30
   9   6   0  101.49   15.20
 -15   9   0   81.99   16.10
   6 -15   0  120.99   14.80
  15  -9   0   71.49   11.50
  -9  -6   0   73.29   10.90
  15  -9   0  143.89   19.60
  -6  15   0   85.49   10.70
  -6  15   0  109.69   14.90
  -9  -6   0   83.49   18.40
  10   5   0   64.29   10.90
 -15  10   0   77.29   14.40
   5 -15   0   69.19   15.50
   5 -15   0   71.29   13.20
 -10  -5   0   54.59   17.40
  15 -10   0   73.79   14.80
  15 -10   0   52.99   10.80
 -10  -5   0   59.09   10.50
  -5  15   0   70.29    9.50
  11   4   0  -18.40    9.00
   4 -15   0    1.80   14.00
 -15  11   0    9.70   11.90
 -11  -4   0    6.10    9.40
 -11  -4   0    5.60   17.10
  -4  15   0    8.50    8.20
  15 -11   0   -5.20   12.10
  -1   0  -1  301.87   11.00
  -1   0  -1  290.97   12.30
   1  -1  -1  283.57   11.10
  -1   0  -1  301.67   11.00
  -1   0  -1  281.47   11.90
   1  -1  -1  298.07   12.00
   0   1  -1  277.97   11.20
   0   1  -1  282.57   11.20
  -1   1   1  306.97   11.00
   0  -1   1  296.47   11.90
   1   0   1  305.17   12.40
   1   0   1  297.17   11.00
   0  -1  -1  295.27   10.60
   0  -1  -1  275.87   12.00
   0  -1  -1  265.87   11.60
   1   0  -1  309.67   10.80
  -1   1  -1  304.67   11.70
   1   0  -1  270.57   11.00
  -1   1  -1  294.97   12.00
   1   0  -1  273.67   11.70
   1  -1   1  300.77   11.40
  -1   0   1  311.67   10.80
   0   1   1  278.47   11.60
  -1   0   1  303.57   11.70
   1  -1   1  297.97   12.00
  -1   0   1  265.77   11.00
   0   1   1  293.87   12.00
   0   1   1  288.47   10.60
  -1   0   1  296.47   11.70
  -1  -1  -1   -3.60    0.90
  -1   2  -1   -3.50    0.90
   2  -1  -1   -3.60    1.00
  -1  -1  -1   -4.00    0.80
   2  -1  -1   -5.10    0.60
  -1   2  -1   -4.00    2.00
  -1   2  -1   -4.00    0.60
   2  -1  -1   -4.10    1.20
  -1   2  -1   -3.40    0.90
  -1  -1  -1   -4.20    1.20
  -2   1   1   -3.50    1.20
   1  -2   1   -5.40    1.00
  -2   1   1   -5.10    0.50
   1   1   1   -5.00    0.70
  -2   1   1   -3.10    0.70
   1   1   1   -3.80    0.80
  -2   1   1   -2.70    1.10
   1  -2   1   -3.60    2.00
   1  -2   1   -5.00    0.60
   1   1   1   -3.70    1.30
   1  -2   1   -3.30    1.00
   3  -2  -1   17.90    1.80
   3  -2  -1   22.90    2.90
  -2  -1  -1   14.20    2.20
  -1   3  -1   20.30    2.40
  -1   3  -1   23.70    3.80
  -2  -1  -1   21.60    3.10
  -1   3  -1   23.20    2.60
   3  -2  -1   13.90    2.60
  -1   3  -1   19.80    2.00
  -3   2   1   17.20    1.70
   1  -3   1   19.00    3.50
   1  -3   1   18.90    2.60
   2   1   1   20.70    2.00
   1  -3   1   14.60    2.00
   1  -3   1   23.00    2.60
   2   1   1   24.40    2.60
   2   1   1   16.70    3.00
  -2   0  -1  134.09    5.30
  -2   0  -1  118.59    5.90
   2  -2  -1  127.99    5.70
  -2   0  -1  132.89    6.80
   0   2  -1  144.69    5.80
   0   2  -1  123.89    6.40
   0   2  -1  134.69    5.50
   0   2  -1  127.89    5.80
  -2   2   1  122.09    5.70
  -2   2   1  138.19    6.20
   2   0   1  124.99    5.90
   2   0   1  110.59    6.60
   2   0   1  131.79    5.20
   0  -2   1  129.79    5.70
   0  -2   1  123.39    5.40
   1   1  -1   -4.50    1.10
  -2   1  -1   -4.00    0.70
   1  -2  -1   -3.90    0.50
  -2   1  -1   -5.20    1.20
   1   1  -1   -2.80    0.90
   1   1  -1   -4.10    1.00
   1  -2  -1   -4.40    1.00
  -2   1  -1   -5.40    1.90
   1   1  -1   -3.80    0.90
   1  -2  -1   -5.10    0.80
  -1  -1   1   -4.70    0.80
   2  -1   1   -3.40    0.70
  -1   2   1   -5.00    0.90
   2  -1   1   -4.00    1.50
   2  -1   1   -5.10    2.00
  -1  -1   1   -4.20    1.10
  -1  -1   1   -4.20    0.90
  -1   2   1   -4.00    0.60
  -1  -1   1   -3.30    1.00
  -1   2   1   -3.40    1.00
   2   0  -1  143.09    5.70
   2   0  -1  147.39    6.20
   0  -2  -1  125.79    5.80
   0  -2  -1  145.59    6.60
   2   0  -1  128.59    6.40
   0  -2  -1  138.59    6.30
  -2   2  -1  133.69    5.90
  -2   2  -1  135.69    6.50
  -2   2  -1  138.89    7.30
   0  -2  -1  120.29    5.20
   2   0  -1  124.09    5.60
   0  -2  -1  118.49    5.50
   2  -2   1  131.19    6.60
  -2   0   1  133.79    5.70
   0   2   1  132.09    5.60
   2  -2   1  138.59    5.90
   0   2   1  141.09    6.00
   0   2   1  112.79    5.20
   2  -2   1  136.49    7.50
  -2   0   1  133.59    5.60
  -2   0   1  126.59    6.30
  -2   0   1  125.89    6.10
  -2   3  -1   17.20    3.00
  -2   3  -1   22.50    1.80
   3  -1  -1   20.10    2.50
   3  -1  -1   22.70    2.40
  -1  -2  -1   20.80    2.80
   3  -1  -1   15.60    2.70
  -2   3  -1   24.60    4.30
  -1  -2  -1   21.30    2.90
   1   2   1   19.60    2.10
  -3   1   1   23.40    2.50
   1   2   1   27.50    2.60
  -3   1   1   19.50    2.60
   2  -3   1   22.10    2.50
   2  -3   1   21.50    1.70
   2  -3   1   21.00    3.10
  -3   1   1   19.70    1.90
  -3   1   1   21.00    2.80
   1   2   1   20.30    3.30
  -2   4  -1   -3.90    1.70
   4  -2  -1   -6.10    1.10
   4  -2  -1   -5.00    1.40
  -2   4  -1   -4.50    1.10
  -2   4  -1   -4.90    3.40
  -2  -2  -1   -3.50    2.10
  -2   4  -1   -5.90    1.60
   4  -2  -1   -4.80    1.40
  -4   2   1   -4.70    0.90
   2   2   1   -5.00    1.20
  -4   2   1   -4.90    2.10
   2  -4   1   -6.40    1.20
  -4   2   1   -5.50    1.40
   2   2   1   -3.70    1.50
  -2   5  -1    1.90    1.50
  -2   5  -1    1.00    1.90
   5  -3  -1    3.20    1.70
   5  -3  -1    4.50    2.20
  -3  -2  -1    1.90    2.80
  -2   5  -1    7.60    2.10
  -2   5  -1    3.00    4.70
  -5   3   1    7.70    2.90
   3   2   1    8.40    2.20
   3   2   1    5.70    1.60
  -5   3   1    3.00    1.20
  -3  -1  -1  122.19    7.70
  -1   4  -1  139.09    6.40
  -1   4  -1  130.39    6.50
   4  -3  -1  123.39    6.50
  -1   4  -1  132.19    8.60
  -1   4  -1  123.99    5.90
   4  -3  -1  111.59    5.50
  -4   3   1  121.89    7.30
   3   1   1  130.29    5.80
   3   1   1  131.19    6.70
  -4   3   1  134.59    5.50
   0   3  -1   37.40    5.20
   0   3  -1   35.90    2.90
   3  -3  -1   37.80    2.60
   3  -3  -1   37.20    3.50
   0   3  -1   39.10    3.30
  -3   0  -1   40.60    4.70
  -3   0  -1   38.30    2.90
   0   3  -1   44.10    3.50
   3   0   1   40.50    2.60
  -3   3   1   39.20    2.50
   3   0   1   37.80    3.40
   0  -3   1   35.70    3.30
  -3   3   1   35.40    3.80
   1   2  -1   18.00    2.90
  -3   1  -1   19.40    3.10
  -3   1  -1   25.80    3.80
   1   2  -1   21.50    2.70
  -3   1  -1   24.10    3.00
   1   2  -1   24.50    3.80
   2  -3  -1   19.10    2.50
  -2   3   1   16.30    2.40
  -1  -2   1   24.30    2.80
  -2   3   1   18.80    3.00
   3  -1   1   13.00    3.50
  -1  -2   1   17.40    2.60
   3  -1   1   19.90    2.30
   2   1  -1   20.90    2.80
   2   1  -1   20.30    2.70
  -3   2  -1   16.00    2.20
   2   1  -1   17.20    2.20
   1  -3  -1   16.00    2.20
  -3   2  -1   21.70    4.00
   1  -3  -1   23.30    3.70
   1  -3  -1   14.20    1.90
  -3   2  -1   20.90    2.80
  -1   3   1   20.30    2.90
   3  -2   1   21.80    2.20
  -2  -1   1   15.30    2.30
  -1   3   1   18.20    2.30
   3  -2   1   14.60    3.80
  -2  -1   1   24.20    2.30
  -2  -1   1   23.80    3.20
  -3   3  -1   34.60    3.10
   3   0  -1   39.90    3.60
   3   0  -1   42.10    4.60
   0  -3  -1   37.20    3.40
  -3   3  -1   50.09    6.70
   3   0  -1   38.60    3.40
   0  -3  -1   36.90    2.80
  -3   3  -1   47.80    4.20
   0  -3  -1   42.60    5.10
  -3   0   1   37.00    3.40
  -3   0   1   40.40    3.00
  -3   0   1   47.80    4.40
   3  -3   1   46.60    3.10
   0   3   1   29.80    3.10
   0   3   1   50.09    3.50
   4  -1  -1  120.69    6.40
  -3   4  -1  126.59    6.90
  -1  -3  -1  132.39    7.50
   4  -1  -1  129.49    6.30
  -3   4  -1  121.59    9.40
   1   3   1  129.89    6.60
  -4   1   1  128.69    7.50
   1   3   1  113.99    5.90
  -4   1   1  125.39    5.60
   3  -4   1  136.19    6.20
  -3   5  -1    4.50    1.50
  -3   5  -1    7.00    5.20
  -2  -3  -1    0.80    2.80
   5  -2  -1    4.00    2.20
  -3   5  -1    1.90    2.20
   5  -2  -1    5.80    1.80
  -5   2   1    2.30    1.30
   2   3   1    7.00    2.30
  -5   2   1    5.80    2.70
   2   3   1    1.40    1.50
  -3  -3  -1   -0.10    3.60
   6  -3  -1   -3.50    2.30
  -3   6  -1    0.30    2.40
   6  -3  -1   -1.60    2.10
  -3   6  -1   -4.50    5.40
  -3   6  -1   -1.30    1.60
  -3   6  -1   -2.90    2.30
  -6   3   1   -1.40    1.40
   3   3   1   -0.90    1.70
  -6   3   1    0.40    3.10
   3   3   1    4.60    2.50
  -3   7  -1  239.38   12.00
  -3   7  -1  222.58   10.40
  -3   7  -1  232.28   16.50
   7  -4  -1  235.38   11.40
  -3   7  -1  238.28   11.40
  -4  -3  -1  224.48   13.80
   7  -4  -1  241.18   11.90
  -7   4   1  234.78    9.90
   4   3   1  250.87   12.40
  -7   4   1  239.58   13.20
   4   3   1  225.88   10.50
   6  -4  -1    1.10    1.90
  -2   6  -1    4.00    2.50
  -4  -2  -1   -1.20    3.40
  -2   6  -1    0.30    2.40
  -2   6  -1   -2.80    5.70
   6  -4  -1   -3.50    2.40
  -2   6  -1    1.30    2.00
  -6   4   1    1.80    3.10
  -6   4   1    2.50    1.40
   4   2   1    1.10    1.70
   4   2   1    3.60    2.50
  -1   5  -1    5.90    2.10
  -1   5  -1    8.40    2.80
  -1   5  -1    4.50    4.70
   5  -4  -1    5.00    2.30
  -4  -1  -1    5.60    3.30
  -5   4   1   14.70    3.30
   4   1   1    7.80    2.40
   4   1   1    5.50    1.70
   0   4  -1  536.15   20.60
   4  -4  -1  512.45   20.50
   0   4  -1  518.25   21.50
  -4   0  -1  531.95   23.50
   0   4  -1  511.55   21.70
  -4   4   1  533.05   20.00
  -4   4   1  559.84   22.60
   4   0   1  506.75   22.00
   0  -4   1  519.35   22.10
   1   3  -1  114.59    5.80
   3  -4  -1  116.69    6.40
  -4   1  -1  137.99    8.30
  -4   1  -1  127.19    5.50
   1   3  -1  132.39    6.50
   1   3  -1  115.79    7.20
  -3   4   1  126.19    5.40
   4  -1   1  118.29    6.30
   4  -1   1  117.89    6.00
  -1  -3   1  126.29    6.70
  -1  -3   1  115.89    6.50
  -3   4   1  137.89    7.00
  -4   2  -1   -5.10    2.30
   2   2  -1   -0.90    2.20
  -4   2  -1   -1.90    3.60
   2  -4  -1   -6.10    1.50
   2   2  -1   -3.70    1.70
   2   2  -1   -3.20    2.20
  -2  -2   1   -5.40    1.90
  -2  -2   1   -2.80    1.50
  -2  -2   1   -4.40    1.50
  -2   4   1   -2.90    1.70
  -2   4   1   -3.50    1.20
   4  -2   1   -3.60    1.30
  -4   3  -1  120.59    9.40
   1  -4  -1  112.59    5.90
   3   1  -1  135.09    6.80
   3   1  -1  123.29    7.60
   3   1  -1  122.09    5.80
  -4   3  -1  129.79    7.40
   1  -4  -1  101.29    8.40
  -1   4   1  137.39    6.80
  -3  -1   1  108.49    7.00
   4  -3   1  129.19    6.10
  -3  -1   1  117.29    5.80
  -1   4   1  123.59    5.80
  -3  -1   1  120.79    5.90
   4   0  -1  501.25   21.80
  -4   4  -1  569.04   22.70
   0  -4  -1  479.15   19.40
   0  -4  -1  467.65   20.70
   4   0  -1  540.25   19.90
  -4   4  -1  551.94   23.30
   0  -4  -1  555.34   22.70
   0   4   1  540.65   21.60
   4  -4   1  523.75   21.50
  -4   0   1  515.15   22.70
  -4   0   1  529.05   20.40
   0   4   1  500.25   20.40
   5  -1  -1    6.20    2.20
  -1  -4  -1   11.30    3.60
  -4   5  -1   23.60    6.10
   5  -1  -1    3.50    2.10
  -5   1   1    7.40    1.90
   1   4   1    7.20    2.40
  -5   1   1    8.30    3.40
   4  -5   1    7.40    1.90
   1   4   1    3.70    1.90
   6  -2  -1    0.20    2.50
   6  -2  -1    1.50    2.30
  -2  -4  -1    0.70    3.60
  -4   6  -1   -1.10    1.60
  -4   6  -1    9.50    6.60
  -4   6  -1    5.30    2.60
  -6   2   1    1.90    1.60
   4  -6   1    2.40    2.00
   2   4   1   -0.50    1.80
  -6   2   1   -0.60    3.10
   2   4   1   -0.30    2.20
  -4   7  -1  242.38   12.10
   7  -3  -1  232.48   11.50
   7  -3  -1  227.98   11.40
  -3  -4  -1  222.18   13.30
  -4   7  -1  228.48   17.00
  -4   7  -1  240.38   10.20
  -7   3   1  223.28   13.20
  -7   3   1  228.88   10.00
   3   4   1  228.68   10.70
   3   4   1  234.58   11.90
  -4   8  -1    1.50    7.10
  -4   8  -1    5.30    3.50
   8  -4  -1    4.10    3.30
  -4  -4  -1   -2.70    5.10
  -4   8  -1   -2.30    2.40
  -8   4   1    0.90    2.00
   4   4   1   -1.40    2.90
  -8   4   1    1.00    4.30
   4   4   1   -0.50    2.50
  -4   9  -1   14.20    3.30
  -4   9  -1   13.10    4.10
   9  -5  -1   12.60    4.00
  -5  -4  -1    1.00    5.80
   9  -5  -1    8.30    4.50
  -4   9  -1   11.70    9.40
   5   4   1    9.80    4.00
   5   4   1   11.10    3.50
  -9   5   1    8.20    6.10
  -5  -3  -1  172.28   12.80
  -3   8  -1  169.18    8.80
  -3   8  -1  149.59   10.20
   8  -5  -1  173.48   10.80
   8  -5  -1  171.28    9.60
  -3   8  -1  165.08    9.50
  -3   8  -1  169.88   16.70
  -8   5   1  144.49   11.10
  -8   5   1  168.78    7.80
   5   3   1  172.98   10.50
   5   3   1  171.98    8.50
   7  -5  -1   27.20    4.40
  -5  -2  -1   23.70    5.20
  -2   7  -1   25.70    8.00
  -2   7  -1   29.20    5.10
   7  -5  -1   12.10    3.70
  -2   7  -1   33.30    5.60
  -2   7  -1   21.40    3.30
   5   2   1   19.70    3.30
  -7   5   1   17.20    3.00
   5   2   1   23.50    3.70
  -7   5   1   17.80    4.40
  -1   6  -1    0.20    2.20
  -1   6  -1   -1.10    2.80
  -1   6  -1   -0.80    1.90
  -5  -1  -1    4.30    3.70
   6  -5  -1    2.20    2.60
  -5  -1  -1   -1.70    2.30
  -1   6  -1   -5.00    5.80
  -6   5   1   -0.50    1.50
  -6   5   1   -2.80    2.70
   5   1   1   -0.10    2.40
   0   5  -1  350.76   16.80
  -5   0  -1  358.66   17.80
   0   5  -1  351.26   14.70
   5  -5  -1  347.57   15.20
  -5   0  -1  364.66   14.60
   0   5  -1  344.87   15.50
  -5   5   1  347.87   16.40
   5   0   1  340.07   13.80
   0  -5   1  385.36   16.40
   5   0   1  365.26   15.90
  -5   5   1  344.37   13.90
   1   4  -1    9.00    2.00
   1   4  -1    4.90    2.20
   1   4  -1    6.20    4.00
  -5   1  -1    7.50    3.80
  -5   1  -1    6.40    1.70
   4  -5  -1    1.40    2.70
  -1  -4   1    0.10    3.40
  -4   5   1    9.70    1.70
  -1  -4   1    5.60    2.80
   5  -1   1    9.60    2.20
  -4   5   1   12.00    2.70
   5  -1   1    5.00    2.10
   2   3  -1    7.50    2.40
   3  -5  -1    3.80    2.30
  -5   2  -1    2.00    2.90
   5  -2   1    2.40    2.10
  -3   5   1    3.30    1.60
  -2  -3   1    2.60    2.50
  -3   5   1    2.80    2.20
   5  -2   1    4.10    1.80
  -2  -3   1    5.50    2.20
   3   2  -1    5.90    2.20
   2  -5  -1    2.40    2.10
  -5   3  -1    4.10    2.50
  -2   5   1    3.90    1.60
  -2   5   1    3.50    1.90
   5  -3   1    2.80    1.70
  -3  -2   1    4.00    1.80
  -3  -2   1    3.40    2.60
   4   1  -1    4.60    2.10
   4   1  -1    9.30    2.80
  -5   4  -1    7.40    5.10
  -5   4  -1    1.10    3.10
   1  -5  -1    3.20    2.20
  -1   5   1   11.10    3.00
  -4  -1   1    5.20    2.40
  -1   5   1    6.70    1.90
  -4  -1   1    0.80    2.00
   5  -4   1    5.50    2.00
  -1   5   1    3.30    1.90
   0  -5  -1  387.86   17.40
  -5   5  -1  367.56   18.80
   5   0  -1  352.96   14.70
   5   0  -1  338.87   16.10
  -5   5  -1  375.46   17.10
  -5   0   1  387.46   15.10
   0   5   1  340.17   15.00
  -5   0   1  398.96   17.80
   0   5   1  368.46   16.00
   5  -5   1  350.26   15.70
   6  -1  -1    0.40    2.50
  -5   6  -1    4.10    2.90
  -1  -5  -1    0.10    3.30
   6  -1  -1    0.30    2.40
   1   5   1   -1.10    1.70
  -6   1   1   -2.20    1.80
  -6   1   1    0.50    3.90
   5  -6   1    0.30    2.10
   1   5   1   -0.70    2.60
  -5   7  -1   20.70    3.30
   7  -2  -1   30.10    5.30
  -2  -5  -1   23.00    4.90
   7  -2  -1   19.80    3.90
  -5   7  -1   22.80    4.20
  -5   7  -1   21.90    6.80
   5  -7   1   24.00    3.30
   2   5   1   35.60    5.70
   2   5   1   24.30    4.10
  -7   2   1   23.70    3.60
  -7   2   1   21.90    4.90
  -5   8  -1  174.88   10.40
  -3  -5  -1  147.09   12.10
   8  -3  -1  158.28    9.80
  -5   8  -1  161.98    8.10
  -5   8  -1  171.28   15.40
   8  -3  -1  159.98   10.10
  -8   3   1  170.88   11.70
  -8   3   1  165.28    8.00
   3   5   1  165.08    8.80
   5  -8   1  156.28    9.20
   3   5   1  168.98   10.50
  -5   9  -1    7.30    3.00
   9  -4  -1    4.40    4.60
  -5   9  -1   11.00    4.00
  -5   9  -1   16.20    9.20
  -4  -5  -1    8.20    5.70
   9  -4  -1   11.00    4.20
   4   5   1    9.90    3.20
   5  -9   1   10.90    3.30
  -9   4   1    8.20    6.20
   4   5   1   13.10    4.20
  -9   4   1   11.20    2.90
  10  -5  -1  -10.40    5.00
  10  -5  -1    3.30    4.60
  -5  -5  -1   -2.80    6.60
  -5  10  -1   -2.60    5.00
  -5  10  -1    1.20    3.40
 -10   5   1    2.90    2.70
 -10   5   1   -6.70    6.20
   5 -10   1   -5.90    3.50
   5   5   1   -2.30    3.30
   5   5   1   -4.20    4.60
  11  -6  -1  312.67   17.40
  -6  -5  -1  322.87   17.20
  -6  -5  -1  332.77   22.70
  11  -6  -1  334.47   18.20
  -5  11  -1  327.57   15.80
  -5  11  -1  307.97   18.50
 -11   6   1  312.27   20.10
   6   5   1  327.87   18.00
  -4  10  -1   35.10    6.80
  -4  10  -1   54.99   12.60
  -6  -4  -1   37.50    5.80
  10  -6  -1   33.60    6.50
  -4  10  -1   40.00    5.70
  10  -6  -1   40.60    5.60
  -4  10  -1   44.90    5.20
  -6  -4  -1   31.80    8.70
   6   4   1   34.10    5.60
 -10   6   1   47.80    7.90
   9  -6  -1   49.10    7.20
  -6  -3  -1   42.30    7.90
  -6  -3  -1   50.29    7.10
   9  -6  -1   63.69    7.10
  -3   9  -1   51.99    6.10
  -3   9  -1   67.79    8.30
  -3   9  -1   42.40    6.90
  -3   9  -1   67.79   11.50
   6   3   1   34.90    5.70
  -9   6   1   50.19    4.30
  -9   6   1   74.69   10.10
  -6  -2  -1  400.06   17.70
  -2   8  -1  387.46   19.00
   8  -6  -1  408.76   18.00
  -6  -2  -1  385.66   21.40
  -2   8  -1  425.96   17.30
   8  -6  -1  401.96   18.30
  -2   8  -1  431.56   18.40
  -2   8  -1  428.36   23.40
   6   2   1  394.16   18.90
  -8   6   1  381.46   16.10
  -8   6   1  398.36   20.10
   7  -6  -1   71.69    7.00
  -6  -1  -1   71.39    9.10
  -6  -1  -1   71.99    5.90
  -1   7  -1   70.49    5.60
  -1   7  -1   93.19   10.60
  -1   7  -1   75.89    6.30
   6   1   1   72.29    6.70
  -7   6   1   70.29    4.30
  -7   6   1   67.29    7.20
  -6   0  -1  278.57   12.20
   0   6  -1  276.27   13.10
   0   6  -1  281.27   12.30
  -6   0  -1  285.87   15.60
   6  -6  -1  254.27   13.10
   0   6  -1  263.07   15.40
  -6   6   1  251.57   13.60
   6   0   1  290.07   13.60
   0  -6   1  284.57   14.20
  -6   6   1  285.17   11.40
   1   5  -1    4.30    1.80
   5  -6  -1   -2.00    2.80
   1   5  -1   -6.20    4.60
  -6   1  -1    1.10    1.90
   1   5  -1   -1.00    2.50
  -6   1  -1    0.10    3.90
  -5   6   1   -0.10    2.90
   6  -1   1    0.20    2.20
   6  -1   1    0.40    2.30
  -1  -5   1   -1.00    3.20
  -5   6   1   -0.10    1.60
   2   4  -1    2.20    1.70
  -6   2  -1   -4.40    3.10
   2   4  -1   -0.40    2.60
   4  -6  -1   -2.40    2.50
  -4   6   1    1.60    1.80
  -2  -4   1    2.50    3.00
  -4   6   1    0.50    2.70
   6  -2   1   -1.10    2.30
   6  -2   1    4.80    2.00
   3   3  -1    0.00    2.60
   3  -6  -1    0.50    2.70
  -6   3  -1   -1.40    3.20
  -3   6   1   -0.30    2.50
  -3  -3   1    2.40    3.10
   6  -3   1   -1.70    1.90
  -3   6   1   -0.30    1.70
  -3  -3   1   -1.60    2.10
   6  -3   1   -1.20    2.70
  -6   4  -1   -0.90    2.90
   2  -6  -1    0.80    2.50
   4   2  -1    1.90    2.40
  -2   6   1   -0.10    1.90
  -2   6   1    4.30    1.90
  -4  -2   1    0.50    3.20
  -4  -2   1    1.90    2.10
  -2   6   1    1.30    2.80
   6  -4   1    0.80    2.00
   6  -4   1    3.60    2.80
   5   1  -1   -3.80    2.50
   1  -6  -1    0.00    2.70
  -6   5  -1    4.00    3.40
   5   1  -1    1.80    2.70
   1  -6  -1   -1.50    2.30
  -5  -1   1   -0.50    3.50
  -5  -1   1    2.90    2.20
  -1   6   1    2.20    2.20
  -1   6   1   -2.20    1.80
   6  -5   1    0.10    2.00
  -6   6  -1  267.07   17.00
   0  -6  -1  251.07   11.80
   0  -6  -1  290.27   14.70
   6   0  -1  275.27   13.40
   6   0  -1  280.07   12.20
  -6   6  -1  306.17   14.60
  -6   0   1  290.17   12.20
   0   6   1  262.27   12.80
   0   6   1  262.87   12.30
  -6   0   1  267.07   15.10
   6  -6   1  291.97   12.80
  -1  -6  -1   73.39    8.40
   7  -1  -1   69.89    6.50
  -6   7  -1   55.69    8.70
  -6   7  -1   74.49    7.10
   7  -1  -1   67.39    6.60
  -7   1   1   76.29    5.20
   1   6   1   66.29    6.80
  -7   1   1   74.89    9.00
   6  -7   1   70.39    5.70
   1   6   1   61.59    5.30
   8  -2  -1  399.86   18.90
   8  -2  -1  418.56   17.80
  -6   8  -1  410.46   22.90
  -2  -6  -1  424.66   21.30
  -6   8  -1  429.86   19.80
   2   6   1  414.96   19.20
   6  -8   1  418.46   18.20
  -8   2   1  416.16   17.00
  -8   2   1  405.66   21.00
   2   6   1  371.06   17.60
  -6   9  -1   50.69    6.90
   9  -3  -1   51.09    7.80
  -3  -6  -1   47.80    8.00
  -6   9  -1   43.00    5.20
   9  -3  -1   54.99    7.70
  -9   3   1   53.39    5.30
   3   6   1   42.10    6.00
   6  -9   1   42.50    6.70
   3   6   1   65.09    8.10
  -9   3   1   51.19    8.00
  -6  10  -1   45.90    6.40
  10  -4  -1   31.00    6.30
  -4  -6  -1   43.70    8.70
  10  -4  -1   38.70    5.80
  -6  10  -1   37.30    4.40
   4   6   1   42.90    6.30
   4   6   1   40.50    5.90
   6 -10   1   45.60    5.50
 -10   4   1   36.70    8.30
 -10   4   1   37.30    4.20
  -6  11  -1  347.17   15.30
  11  -5  -1  327.37   17.70
  11  -5  -1  322.17   17.30
  -5  -6  -1  312.37   22.00
  -6  11  -1  307.17   18.50
   6 -11   1  309.57   16.50
   6 -11   1  313.27   18.30
   5   6   1  297.67   17.70
   5   6   1  315.47   15.60
 -11   5   1  322.27   14.30
 -11   5   1  311.87   20.80
  -6  -6  -1   22.80   10.50
  -6  -6  -1   -2.30    6.50
  12  -6  -1   -5.40    6.20
  -6  12  -1    2.70    4.90
  -6  12  -1    7.50    7.00
   6   6   1    1.70    6.00
 -12   6   1    8.60    8.60
   6 -12   1    4.60    6.90
 -12   6   1    1.70    4.20
   6 -12   1   -7.80    5.90
  13  -7  -1    7.80    7.10
  -7  -6  -1    5.90    7.60
  13  -7  -1   17.90    8.50
  -6  13  -1    5.60    8.90
  -6  13  -1   -6.60    5.70
  -7  -6  -1   24.60   12.30
 -13   7   1    8.60    9.30
   6 -13   1    3.10    8.90
   6 -13   1   19.50    7.00
   7   6   1    7.90    6.90
  12  -7  -1   32.20    8.30
  -7  -5  -1   30.50    7.30
  -5  12  -1   19.50    6.00
  12  -7  -1   19.30    6.40
  -5  12  -1   14.50    8.30
  -7  -5  -1   43.50   11.10
 -12   7   1   29.90    9.30
   7   5   1   28.40    7.00
   5 -12   1   30.60    8.60
  -7  -4  -1   24.70    6.10
  -4  11  -1   53.49    8.50
  11  -7  -1   26.30    7.00
  11  -7  -1   40.00    6.30
  -7  -4  -1   41.60   10.10
  -4  11  -1   33.30    5.80
  -4  11  -1   33.70    7.70
   7   4   1   24.70    6.20
 -11   7   1   27.00    7.90
  10  -7  -1    3.20    4.20
  -7  -3  -1    5.50    4.30
  10  -7  -1   -5.00    5.30
  -3  10  -1    2.50    4.00
  -3  10  -1   14.20   12.00
  -3  10  -1    2.60    4.40
  -3  10  -1    8.90    5.70
  -7  -3  -1    5.60    8.30
   7   3   1   -3.40    5.10
 -10   7   1   -1.60    6.40
  -2   9  -1   84.39    8.70
  -7  -2  -1   66.49    9.70
   9  -7  -1   85.59    9.20
  -7  -2  -1   76.69    7.40
  -2   9  -1   89.09   13.20
  -2   9  -1   72.39    8.20
  -2   9  -1   46.90    6.90
  -9   7   1   69.19    9.70
   7   2   1   66.49    8.40
  -9   7   1   62.49    5.10
   8  -7  -1  104.69    8.90
  -7  -1  -1   98.59    7.30
  -1   8  -1  100.59    8.00
  -7  -1  -1   89.19   11.60
  -1   8  -1  106.69    7.10
  -1   8  -1  113.79   12.40
  -8   7   1   85.29    9.80
  -8   7   1   82.09    5.50
   1  -8   1   86.39    9.40
   7   1   1   91.29    8.40
  -7   0  -1    5.00    5.50
   0   7  -1   -0.10    7.30
   0   7  -1   13.50    3.70
  -7   0  -1    3.70    2.80
   7  -7  -1    6.10    3.80
   0   7  -1    9.10    3.00
   0  -7   1    6.40    4.30
  -7   7   1   12.90    4.00
   7   0   1    8.40    3.20
  -7   7   1   10.20    2.20
   1   6  -1   63.49    5.10
  -7   1  -1   66.09    9.10
   6  -7  -1   59.99    7.00
  -7   1  -1   62.19    5.10
   1   6  -1   66.19    6.60
   1   6  -1   70.19   10.20
   7  -1   1   76.59    5.90
  -6   7   1   69.19    6.70
  -6   7   1   78.49    4.80
  -1  -6   1   72.69    7.80
   7  -1   1   69.09    6.50
  -7   2  -1   28.70    3.40
   2   5  -1   23.50    3.70
   2   5  -1   21.70    3.70
  -7   2  -1   17.10    5.30
   5  -7  -1   20.60    4.30
   7  -2   1   19.40    3.40
  -2  -5   1   12.70    4.40
  -5   7   1   26.10    4.20
  -5   7   1   22.10    3.70
   7  -2   1   18.90    3.40
   4  -7  -1  223.78   11.40
   3   4  -1  242.18   11.90
  -7   3  -1  220.48   13.20
   7  -3   1  217.88   11.10
   7  -3   1  223.18   11.10
  -4   7   1  229.88   10.00
  -3  -4   1  213.88   12.80
  -4   7   1  233.28   11.90
  -3  -4   1  213.58   11.10
   3  -7  -1  209.78   11.30
   4   3  -1  254.07   12.30
  -7   4  -1  239.48   13.10
  -4  -3   1  230.88   11.00
   7  -4   1  211.78   11.10
  -3   7   1  231.58   10.30
   7  -4   1  251.87   11.80
  -3   7   1  231.38   12.10
  -4  -3   1  206.78   13.00
   5   2  -1   22.00    3.70
  -7   5  -1   21.20    4.30
   2  -7  -1   22.20    4.00
  -5  -2   1   26.40    4.90
  -5  -2   1   20.40    3.40
   7  -5   1   17.50    4.00
  -2   7   1   21.10    4.20
  -2   7   1   25.40    3.30
  -2   7   1   23.50    3.20
   7  -5   1   31.50    4.90
   1  -7  -1   67.39    7.70
   6   1  -1   60.69    6.10
   1  -7  -1   63.49    6.20
  -7   6  -1   65.59    7.50
   6   1  -1   87.29    7.30
   7  -6   1   76.79    6.00
   7  -6   1   73.09    7.30
  -1   7   1   71.79    5.50
  -6  -1   1   82.29    5.70
  -6  -1   1   72.89    9.00
  -1   7   1   66.19    6.10
  -7   7  -1    6.80    3.90
   0  -7  -1   12.90    4.60
   7   0  -1   11.70    3.60
   7   0  -1   12.00    3.70
   7  -7   1    8.20    2.90
   7  -7   1    8.40    4.20
   0   7   1    9.40    2.90
  -7   0   1    8.00    3.00
   0   7   1    3.80    3.40
  -7   0   1    3.30    5.30
   8  -1  -1   89.19    7.90
  -1  -7  -1   92.39   10.80
  -7   8  -1  105.49    9.20
   8  -1  -1   86.09    8.30
  -8   1   1   83.39   11.00
  -8   1   1  109.89    6.70
   7  -8   1   86.09    9.30
   7  -8   1  102.39    7.40
   1   7   1   88.89    7.50
   1   7   1  102.19    8.20
   9  -2  -1   70.39    8.60
   9  -2  -1   67.79    8.50
  -2  -7  -1   58.59    8.50
  -7   9  -1   90.99    9.40
   7  -9   1   60.69    7.50
  -9   2   1  100.59   12.40
  -9   2   1   74.59    6.30
   7  -9   1   74.49    7.30
   2   7   1   60.79    7.30
   2   7   1   69.49    8.50
  10  -3  -1    5.30    4.40
  -7  10  -1    1.90    5.90
  -3  -7  -1   -0.30    6.80
  -7  10  -1   -1.70    3.30
  10  -3  -1    0.50    5.10
   7 -10   1    1.80    5.80
   7 -10   1    8.40    4.20
 -10   3   1    1.00    6.50
 -10   3   1    5.80    3.30
   3   7   1    8.60    5.10
   3   7   1    0.80    3.50
  11  -4  -1   40.10    7.20
  11  -4  -1   36.30    6.10
  -4  -7  -1   40.50   10.20
  -7  11  -1   31.00    6.90
  -7  11  -1   34.70    4.80
   7 -11   1   40.10    7.50
 -11   4   1   35.60    4.60
 -11   4   1   29.90    9.30
   4   7   1   33.70    5.20
   4   7   1   42.60    6.70
   7 -11   1   27.60    6.20
  12  -5  -1   32.40    8.20
  12  -5  -1   26.10    6.80
  -5  -7  -1   27.20   10.20
  -7  12  -1   16.90    8.30
 -12   5   1   26.50    9.40
   7 -12   1   17.50    6.50
 -12   5   1   26.10    4.70
   5   7   1   24.80    5.60
   7 -12   1   30.20    8.40
   5   7   1   27.20    6.70
  -7  13  -1   18.50    8.10
  -7  13  -1   10.10    6.30
  13  -6  -1   11.00    8.40
  -6  -7  -1   21.30   11.60
  13  -6  -1   18.70    7.00
  -6  -7  -1   16.90    7.50
   6   7   1   15.30    6.90
   7 -13   1   -2.20    9.10
 -13   6   1   17.30    9.90
  -7  -7  -1   -1.70   13.20
  -7  14  -1  -14.30    6.60
  14  -7  -1    2.30    7.60
  14  -7  -1   -0.60    9.60
  -7  -7  -1   -3.90    7.90
  -7  14  -1  -12.50    9.50
 -14   7   1   -5.30   10.00
   7 -14   1    3.10    8.00
   7 -14   1  -11.40    9.80
   7   7   1    2.00    7.80
  15  -8  -1   39.70   12.30
  -8  -7  -1   40.10   10.50
  -8  -7  -1   45.70   17.70
  15  -8  -1   39.50   10.10
  -7  15  -1   39.70    8.40
  -7  15  -1   37.00   12.10
 -15   8   1   22.30   13.50
   8   7   1   39.90   10.00
   7 -15   1   26.50   12.00
  -8  -6  -1   63.09   15.70
  -8  -6  -1   55.09    9.50
  -6  14  -1   66.99   12.00
  14  -8  -1   70.19   12.10
  14  -8  -1   40.80    8.90
  -6  14  -1   74.69   11.40
   8   6   1   54.19    9.50
 -14   8   1   45.70   13.20
   6 -14   1   50.69   11.80
   6 -14   1   53.39    8.90
  -8  -5  -1   49.80   14.40
  -5  13  -1   32.70    6.90
  -5  13  -1   34.80    9.60
  13  -8  -1   28.30    7.90
  13  -8  -1   45.60   10.10
  -8  -5  -1   32.30    8.40
   5 -13   1   33.40    9.40
   8   5   1   20.10    7.90
 -13   8   1   30.90   10.60
  -4  12  -1   18.90    5.80
  12  -8  -1   10.50    7.50
  -4  12  -1    7.40    7.90
  -8  -4  -1   23.00    6.80
  -4  12  -1    2.00    5.40
  12  -8  -1    9.00    6.70
  -8  -4  -1   16.50   11.00
   8   4   1   12.50    5.90
 -12   8   1    8.30    8.30
   4 -12   1   14.00    7.90
  -8  -3  -1    8.50    5.10
  -3  11  -1    0.70    4.70
  -3  11  -1    4.00    6.00
  -8  -3  -1   -3.30    9.30
  -3  11  -1   -8.30    4.60
  11  -8  -1   -8.00    6.60
   8   3   1   -3.60    5.60
 -11   8   1   10.80    7.30
  10  -8  -1   -1.20    6.70
  -8  -2  -1    8.40    4.90
  -2  10  -1   -4.30    4.30
  -2  10  -1    2.80    4.60
  -8  -2  -1    9.80    8.70
   2 -10   1   14.00    6.70
   8   2   1    2.30    5.20
 -10   8   1   -2.40    5.80
  -1   9  -1   15.60    4.20
   9  -8  -1   15.10    5.60
  -8  -1  -1    8.70    4.10
  -1   9  -1   11.10    4.30
  -1   9  -1   22.70   11.00
  -8  -1  -1   13.40    7.80
   8   1   1   17.00    5.10
  -9   8   1   21.90    6.10
   1  -9   1   17.90    6.20
   0   8  -1   31.80    5.00
  -8   0  -1   27.50    8.50
  -8   0  -1   31.30    4.30
   8  -8  -1   27.90    5.50
   0   8  -1   29.00   10.00
   0   8  -1   43.10    6.00
   0  -8   1   36.90    6.10
   8   0   1   31.80    5.10
  -8   8   1   28.00    4.50
  -8   8   1   28.60    6.50
   1   7  -1  110.29   13.30
   1   7  -1   99.19    7.20
   1   7  -1   89.49    8.20
  -8   1  -1   87.49   11.50
   7  -8  -1   99.59    9.00
  -8   1  -1   95.19    6.70
  -7   8   1   94.79    5.90
  -7   8   1   92.59    9.30
  -1  -7   1  112.89   10.50
   8  -1   1   83.49    8.40
   8  -1   1   93.69    7.50
   2   6  -1  400.76   17.70
  -8   2  -1  409.16   16.90
  -8   2  -1  412.16   21.90
   6  -8  -1  422.36   18.90
   2   6  -1  397.76   19.10
  -6   8   1  441.56   17.10
  -6   8   1  430.56   20.00
   8  -2   1  428.76   17.90
  -2  -6   1  386.56   20.60
   8  -2   1  423.86   19.30
  -8   3  -1  157.98   12.20
   5  -8  -1  156.68   10.30
   3   5  -1  171.78   10.40
   8  -3   1  160.98    9.50
  -5   8   1  179.08    8.30
  -3  -5   1  159.18    9.70
  -3  -5   1  167.98   12.00
  -5   8   1  152.28   10.00
   8  -3   1  155.78    9.90
   4  -8  -1   -4.90    4.20
   4   4  -1   -1.90    3.70
  -8   4  -1    2.30    3.80
  -4  -4   1   -0.30    3.00
  -4  -4   1   -0.70    4.60
   8  -4   1    1.80    2.70
  -4   8   1   -4.40    3.00
  -4   8   1    2.60    2.50
  -8   5  -1  186.58   12.10
   3  -8  -1  164.38   10.10
   5   3  -1  163.78   10.50
  -5  -3   1  162.18    9.10
   8  -5   1  176.88   10.60
  -5  -3   1  147.59   11.90
  -3   8   1  166.58   10.80
   8  -5   1  165.08    9.40
  -3   8   1  147.79    8.50
   2  -8  -1  380.76   17.60
   6   2  -1  418.26   19.10
  -8   6  -1  355.76   20.30
   8  -6   1  443.06   18.90
  -2   8   1  393.96   17.90
  -6  -2   1  422.86   21.00
   8  -6   1  413.56   18.40
  -2   8   1  397.76   19.60
  -6  -2   1  412.06   17.40
  -2   8   1  396.66   17.20
  -8   7  -1   99.69   10.40
   7   1  -1   86.99    8.90
   1  -8  -1   82.79    9.60
   7   1  -1   73.19    7.40
   1  -8  -1   77.99    7.50
  -1   8   1   98.59    7.70
   8  -7   1   92.49    9.40
   8  -7   1  107.19    7.40
  -7  -1   1  101.39   11.40
  -7  -1   1   99.49    7.00
  -1   8   1   80.99    6.90
   0  -8  -1   30.00    6.50
   8   0  -1   29.40    5.20
   8   0  -1   19.50    5.00
  -8   8  -1   28.30    6.10
   8  -8   1   30.10    6.10
   0   8   1   31.60    4.60
   8  -8   1   28.70    4.20
   0   8   1   29.70    4.70
  -8   0   1   33.50    7.10
  -8   0   1   39.80    5.70
   9  -1  -1   12.40    4.80
  -1  -8  -1   10.20    6.80
   9  -1  -1   19.20    4.50
  -8   9  -1    9.50    5.70
   8  -9   1   20.50    3.90
   1   8   1   17.00    4.70
   8  -9   1   13.50    5.50
   1   8   1   14.10    4.40
  -9   1   1   11.40    3.90
  -9   1   1   16.80    7.60
  -8  10  -1    1.50    6.20
  -2  -8  -1   11.60    7.90
  10  -2  -1    7.60    4.90
  10  -2  -1   -3.20    5.10
   2   8   1    5.50    4.60
   8 -10   1    0.80    5.90
   8 -10   1    6.10    4.30
   2   8   1   -4.70    3.80
 -10   2   1    0.50    3.70
 -10   2   1   14.30    7.80
  11  -3  -1   -7.00    5.30
  -3  -8  -1    2.80    8.40
  -8  11  -1    7.10    6.60
  11  -3  -1   -6.20    5.70
   8 -11   1    5.30    4.80
   8 -11   1    2.50    6.90
 -11   3   1   -9.30    7.60
   3   8   1    4.00    4.50
   3   8   1   -0.80    5.50
 -11   3   1    2.10    4.30
  12  -4  -1    4.40    7.50
  -8  12  -1    9.20    7.10
  12  -4  -1   11.10    6.00
  -8  12  -1   15.60    4.80
  -4  -8  -1   18.40    9.90
 -12   4   1    8.10    4.60
 -12   4   1    8.40    9.30
   4   8   1    7.00    5.00
   8 -12   1    5.40    8.00
   4   8   1    5.50    6.80
  13  -5  -1   35.70    7.70
  -5  -8  -1   25.00   12.20
  -8  13  -1   43.90    6.70
  -8  13  -1   34.60   10.40
  13  -5  -1   40.10    9.30
  -5  -8  -1   43.70    9.50
 -13   5   1   38.30   10.70
   8 -13   1   38.00    9.90
   5   8   1   26.00    7.80
 -13   5   1   39.20    5.70
  -6  -8  -1   60.59   10.10
  14  -6  -1   46.70    9.40
  -8  14  -1   70.49   11.70
  -6  -8  -1   72.69   15.20
  -8  14  -1   38.70    7.70
  14  -6  -1   54.99   10.90
   6   8   1   52.99    9.50
 -14   6   1   51.59   12.80
   8 -14   1   43.10   11.00
  -8  15  -1   13.50   11.20
  15  -7  -1   25.40   11.60
  -7  -8  -1   41.40   16.30
  -7  -8  -1   29.10   10.30
  15  -7  -1   27.90    9.50
   8 -15   1   32.60   12.30
 -15   7   1   17.70   12.80
   7   8   1   12.60    9.50
  -9  -6  -1   -7.10   16.70
  -6  15  -1   -0.30    7.40
  -6  15  -1   -4.50   11.40
  -9  -6  -1    7.80    9.40
  15  -9  -1    4.70   11.70
  15  -9  -1    9.90    9.60
   9   6   1   10.80    9.10
   6 -15   1   -2.50    9.80
 -15   9   1    6.30   11.50
   6 -15   1    7.10   11.40
  -9  -5  -1   99.79   13.50
  14  -9  -1   52.79    9.60
  -5  14  -1   75.59   12.30
  -9  -5  -1   74.99   16.80
 -14   9   1   73.19   12.40
   5 -14   1   67.49   12.40
   9   5   1   46.60   10.10
  -9  -4  -1   15.10   13.10
  -9  -4  -1   30.90    7.90
  -4  13  -1   24.60    7.00
  -4  13  -1   26.50    7.00
  13  -9  -1   10.20    9.70
 -13   9   1   19.10    9.00
   4 -13   1   43.20   10.70
   9   4   1   27.00    7.60
   4 -13   1   20.20    9.60
  12  -9  -1   -1.50    7.40
  -3  12  -1    6.80    5.70
  -9  -3  -1    1.10    6.20
  -3  12  -1   11.10    5.80
  -9  -3  -1    3.90   10.30
 -12   9   1   -6.50    7.70
   3 -12   1    6.80    8.50
   3 -12   1   -0.20    8.00
   9   3   1    4.70    6.20
  -2  11  -1  112.39   10.50
  11  -9  -1   83.29   11.00
  -9  -2  -1  122.29   10.20
  -2  11  -1  126.59   10.20
  -9  -2  -1   87.19   13.80
   2 -11   1   90.49   14.50
   9   2   1   77.89   12.00
 -11   9   1  121.09   13.10
  -9  -1  -1  130.69   18.40
  -1  10  -1  146.99   11.50
  -1  10  -1  173.08   22.10
  -9  -1  -1  148.19   10.70
  10  -9  -1  187.08   13.60
  -1  10  -1  166.28   11.00
 -10   9   1  161.38   13.20
   1 -10   1  173.38   14.50
   9   1   1  164.28   12.40
   0   9  -1   61.99   11.40
   9  -9  -1   47.70    7.70
  -9   0  -1   43.10    5.30
   0   9  -1   35.80    5.90
  -9   0  -1   38.80    9.90
   0   9  -1   53.79    7.30
   0  -9   1   35.20    7.20
  -9   9   1   31.00    7.10
  -9   9   1   43.40    5.40
   9   0   1   39.30    6.00
   1   8  -1   10.80    9.40
   8  -9  -1   11.00    5.30
  -9   1  -1   20.00    4.00
   1   8  -1   18.10    4.90
   1   8  -1   13.20    3.90
  -9   1  -1    6.70    6.80
  -8   9   1    6.10    5.30
   9  -1   1   10.50    4.70
  -1  -8   1   17.20    6.90
  -8   9   1   11.00    3.10
   9  -1   1   13.50    4.70
   7  -9  -1   69.59    9.20
  -9   2  -1   67.09    6.00
   2   7  -1   61.79    6.60
  -9   2  -1   64.79   10.10
   2   7  -1   81.09    8.40
  -2  -7   1   75.79   10.70
   9  -2   1   71.19    8.10
  -7   9   1   77.59    9.10
   9  -2   1   62.79    8.50
  -7   9   1   74.89    5.90
   6  -9  -1   45.20    6.70
   3   6  -1   48.30    6.90
  -9   3  -1   56.79    4.80
  -9   3  -1   54.59    8.80
  -6   9   1   59.19    5.70
   9  -3   1   47.10    6.10
   9  -3   1   50.79    7.90
  -3  -6   1   46.80    6.30
  -6   9   1   50.09    7.90
  -3  -6   1   53.69    7.80
   4   5  -1    9.70    4.50
  -9   4  -1    3.00    6.10
   5  -9  -1    7.80    4.80
  -4  -5   1   10.20    4.40
  -5   9   1    9.50    3.00
   9  -4   1    7.20    4.40
  -4  -5   1   14.50    6.10
  -5   9   1    7.20    4.70
   9  -4   1   12.30    4.10
  -9   5  -1    7.30    6.10
   5   4  -1   10.20    4.20
   4  -9  -1    6.70    4.60
   9  -5   1    6.80    4.30
   9  -5   1    7.90    3.50
  -4   9   1   12.80    3.20
  -4   9   1   13.00    4.90
  -5  -4   1   11.00    6.00
  -5  -4   1    9.20    3.90
  -9   6  -1   39.20    7.70
   3  -9  -1   51.99    6.30
   6   3  -1   55.89    7.80
   9  -6   1   44.80    6.60
  -3   9   1   58.49    8.70
   9  -6   1   53.99    6.80
  -3   9   1   57.59    6.70
  -6  -3   1   50.79    7.90
  -6  -3   1   63.19    6.80
  -3   9   1   43.20    6.00
   2  -9  -1   93.69   10.70
   7   2  -1   66.39    8.10
  -9   7  -1   66.49   10.40
   2  -9  -1   59.29    8.20
   9  -7   1   59.29    9.20
  -2   9   1   64.19    7.20
  -2   9   1   69.89    7.30
  -7  -2   1   63.99    7.40
  -7  -2   1   55.59    7.90
   9  -7   1   79.59    7.60
   8   1  -1    6.70    5.30
   1  -9  -1    8.90    4.80
   1  -9  -1   14.80    6.60
  -8  -1   1   18.90    4.30
  -1   9   1   14.00    4.10
   9  -8   1    9.50    5.60
  -1   9   1   20.90    4.70
   9  -8   1   14.90    4.20
  -8  -1   1   13.30    7.80
   9   0  -1   42.80    6.40
  -9   9  -1   39.20    7.20
   0  -9  -1   35.10    7.50
  -9   0   1   47.10    6.80
  -9   0   1   45.00    9.50
   0   9   1   40.00    5.80
   0   9   1   39.80    5.60
   9  -9   1   39.60    7.50
   9  -9   1   51.69    7.40
  -9  10  -1  161.88   13.80
  10  -1  -1  161.58   12.70
  -1  -9  -1  154.68   16.70
  10  -1  -1  173.18   12.50
 -10   1   1  180.78   17.30
   1   9   1  145.39   11.10
   9 -10   1  148.29   10.90
 -10   1   1  168.88   10.20
   1   9   1  171.88   11.70
   9 -10   1  148.69   13.90
  11  -2  -1  115.59   11.80
  -9  11  -1  104.09   12.90
  -2  -9  -1   94.79   12.90
  11  -2  -1  119.89   11.80
   2   9   1  108.19   11.40
   9 -11   1  101.59   10.30
 -11   2   1  106.49    8.90
 -11   2   1  122.59   16.60
   9 -11   1  111.19   13.20
   2   9   1  103.79    9.90
  -9  12  -1   14.90    7.80
  -3  -9  -1    7.50    9.60
  12  -3  -1    7.40    7.20
  12  -3  -1    1.00    6.30
   3   9   1   20.60    6.70
   9 -12   1    3.20    5.50
 -12   3   1    3.10    9.10
   3   9   1    4.30    5.20
 -12   3   1    5.10    5.00
   9 -12   1   -2.40    8.00
  -4  -9  -1    5.50   12.00
  13  -4  -1   21.10    7.30
  13  -4  -1   17.20    8.70
  -9  13  -1   22.00    9.30
   9 -13   1   10.60    8.80
 -13   4   1    9.10   10.90
 -13   4   1   22.40    5.80
   4   9   1   11.80    5.80
   4   9   1   40.60    7.70
  -9  14  -1   76.89   12.60
  14  -5  -1   69.09   11.90
  -5  -9  -1  100.69   15.30
  -5  -9  -1   62.39   15.90
  14  -5  -1   77.69   10.10
   9 -14   1   75.89   12.20
 -14   5   1   63.69   14.10
   5   9   1  102.09   13.60
  15  -6  -1    8.60    8.90
  -6  -9  -1   17.40   15.90
  15  -6  -1   11.40   11.50
  -6  -9  -1   -5.80   10.30
  -9  15  -1   11.60   10.80
   6   9   1   11.90    8.50
 -15   6   1   -3.20   12.40
   9 -15   1    3.80   11.60
  -5  15  -1   48.30    9.30
 -10  -5  -1   75.59   18.80
 -10  -5  -1   39.10   10.00
  15 -10  -1   28.30   13.30
   5 -15   1   62.89   15.50
  10   5   1   47.30   10.20
 -15  10   1   28.10   12.40
   5 -15   1   47.60   12.50
  14 -10  -1  -11.40   11.20
   4 -14   1   10.50   12.60
   4 -14   1   -0.70   10.90
 -14  10   1   24.10   10.80
  -3  13  -1    5.60    6.30
  13 -10  -1   -3.50    9.00
 -10  -3  -1   -2.00    6.80
 -10  -3  -1   -7.00   13.20
  -3  13  -1   12.40    6.60
   3 -13   1   -7.00    8.80
   3 -13   1   -1.90   11.00
  10   3   1    1.60    7.30
 -13  10   1    5.00    9.00
  12 -10  -1   66.89   10.70
 -10  -2  -1   73.39   15.10
 -10  -2  -1   74.69   10.60
  -2  12  -1   81.79   11.20
  -2  12  -1   91.99   10.50
   2 -12   1   85.09   11.70
   2 -12   1   70.19    9.90
 -12  10   1  101.09   14.10
 -10  -1  -1   22.70    5.70
  -1  11  -1    1.40    6.00
  -1  11  -1   11.70    5.70
 -10  -1  -1   21.80   11.40
  11 -10  -1   18.50    7.70
  10   1   1    4.50    6.00
 -11  10   1   11.80    7.90
   1 -11   1   14.30    8.40
   0  10  -1   85.09   14.40
   0  10  -1   78.89    9.20
 -10   0  -1  114.39   17.30
   0  10  -1  101.79   10.30
  10 -10  -1   92.29   12.30
 -10   0  -1   69.99    9.00
 -10  10   1   66.89   11.20
  10   0   1   74.39   10.60
   0 -10   1   72.29   10.10
   9 -10  -1  153.98   13.00
 -10   1  -1  150.88   17.50
 -10   1  -1  157.48   10.00
   1   9  -1  140.29   10.60
   1   9  -1  162.68   11.90
  -1  -9   1  153.88   15.80
  10  -1   1  172.38   12.30
  10  -1   1  153.48   11.50
  -9  10   1  162.88    9.20
  -9  10   1  147.69   13.30
 -10   2  -1    2.30    7.80
   2   8  -1    7.60    4.90
   8 -10  -1   -3.80    6.10
   2   8  -1   -1.10    4.00
 -10   2  -1    7.30    3.80
  -2  -8   1   10.30    8.10
  10  -2   1    0.20    5.00
  -8  10   1    1.60    6.00
  10  -2   1   -7.10    5.10
  -8  10   1    7.80    3.40
 -10   3  -1    9.60    3.30
   3   7  -1   17.10    4.90
 -10   3  -1   21.40    7.80
   7 -10  -1   -1.50    5.10
  -3  -7   1    7.10    7.30
  10  -3   1    4.80    4.30
  10  -3   1    3.40    4.70
  -7  10   1    2.90    3.20
  -3  -7   1    2.30    5.10
  -7  10   1    7.90    5.40
   6 -10  -1   42.20    6.80
   4   6  -1   35.20    5.90
 -10   4  -1   36.20    8.30
  -4  -6   1   39.30    8.40
  -6  10   1   43.80    7.60
  -6  10   1   38.70    6.00
  10  -4   1   32.90    5.80
  10  -4   1   39.00    6.50
  -4  -6   1   42.90    6.20
   5   5  -1   -3.90    4.70
 -10   5  -1   -5.20    6.50
   5 -10  -1   -4.00    5.50
  -5  -5   1    0.20    4.40
  -5  -5   1    7.20    6.70
  10  -5   1   -2.00    4.20
  -5  10   1    5.50    5.00
  -5  10   1   -0.30    3.10
  10  -5   1    1.00    4.80
 -10   6  -1   45.50    8.40
   4 -10  -1   44.50    6.90
   6   4  -1   28.80    5.70
  -6  -4   1   27.80    7.90
  -4  10   1   37.20    7.10
  -6  -4   1   45.70    7.40
  10  -6   1   46.40    6.80
  -4  10   1   54.49    6.80
  10  -6   1   35.00    5.30
 -10   7  -1    3.60    6.50
   7   3  -1   -0.50    4.80
   3 -10  -1    0.90    5.30
  -3  10   1   -1.40    5.50
  -7  -3   1   14.50    7.00
  -7  -3   1    4.50    4.10
  10  -7   1    8.90    4.00
  -3  10   1    8.50    4.00
  10  -7   1    7.20    5.50
  -3  10   1    4.50    4.00
   2 -10  -1   -2.00    6.50
 -10   8  -1    1.00    6.50
   8   2  -1    2.50    4.70
  -8  -2   1    5.70    4.30
  10  -8   1   -1.40    6.00
  -2  10   1   13.00    4.50
  10  -8   1    3.20    4.80
  -8  -2   1   -7.40    7.80
  -2  10   1    2.00    4.20
   1 -10  -1  152.18   15.30
   9   1  -1  168.28   12.60
 -10   9  -1  167.38   14.10
   1 -10  -1  152.78   12.20
  10  -9   1  172.08   11.90
  -9  -1   1  181.08   17.30
  -1  10   1  151.08   11.10
  -1  10   1  154.38   11.20
  10  -9   1  171.18   13.40
  -9  -1   1  154.28   10.70
  10   0  -1   67.59    8.20
  10   0  -1   54.89    8.20
 -10  10  -1   80.59   11.50
   0 -10  -1   88.29   14.70
  10 -10   1   61.49    9.50
 -10   0   1   76.29    8.50
   0  10   1   70.79    9.60
  10 -10   1   65.69    8.90
 -10   0   1   66.69   11.30
   0  10   1   73.49    9.00
  -1 -10  -1   12.90    9.70
 -10  11  -1   19.00    7.20
  11  -1  -1    7.80    7.20
  11  -1  -1   -3.60    6.40
  10 -11   1    4.80    7.10
  10 -11   1    8.70    5.40
 -11   1   1   26.30   10.10
 -11   1   1   10.80    5.30
   1  10   1    1.30    5.40
   1  10   1   22.90    6.60
  12  -2  -1   64.69    9.50
  -2 -10  -1   76.09   13.10
 -10  12  -1   74.99   11.00
  12  -2  -1   47.80    8.90
   2  10   1   81.09   10.30
  10 -12   1   65.59   10.10
 -12   2   1   73.39    9.30
   2  10   1   90.99   11.70
 -12   2   1   84.29   13.30
  13  -3  -1   -2.60    7.20
 -10  13  -1   18.00    8.50
  -3 -10  -1   -4.60   12.00
  13  -3  -1   10.70    9.30
  10 -13   1    1.10    9.10
 -13   3   1    0.90   11.40
   3  10   1    4.50    7.00
   3  10   1    4.60    6.50
 -13   3   1    0.10    6.20
  -4 -10  -1   22.80   14.90
  14  -4  -1   20.40   10.30
 -10  14  -1   12.30   10.70
  14  -4  -1   23.00    8.90
  10 -14   1    1.70   11.40
 -14   4   1   11.50   12.20
 -10  15  -1   38.20   12.00
  15  -5  -1   70.19   12.60
  -5 -10  -1   72.09   11.90
  -5 -10  -1   34.70   17.40
  15  -5  -1   37.20   11.10
   5  10   1   51.19   10.60
 -15   5   1   32.70   15.30
  10 -15   1   55.09   12.50
 -11  -4  -1   -8.80   18.30
 -11  -4  -1   26.90    9.70
  15 -11  -1   56.39   13.30
  -4  15  -1   30.10    8.90
  11   4   1    2.00   10.10
   4 -15   1   40.20   13.90
   4 -15   1   35.30   15.30
 -15  11   1   32.90   12.70
 -11  -3  -1   -7.70   14.70
  -3  14  -1   -8.30    7.20
  14 -11  -1   11.50   11.80
  -3  14  -1    1.00    7.70
 -11  -3  -1    8.40    8.50
  11   3   1   13.70    8.50
   3 -14   1    2.20   13.30
   3 -14   1   -8.90   10.10
 -14  11   1  -10.70   10.40
 -11  -2  -1   79.69   12.20
  13 -11  -1   54.69   12.00
  -2  13  -1   30.70    7.70
 -11  -2  -1   76.59   15.60
  -2  13  -1   59.09    8.70
  11   2   1   45.80    9.30
   2 -13   1   44.10   12.30
 -13  11   1   42.50   10.70
   2 -13   1   40.20   10.10
 -11  -1  -1   31.30   12.90
 -11  -1  -1   -0.70    6.30
  -1  12  -1   -0.70    6.50
  12 -11  -1  -15.60    8.60
  -1  12  -1   -5.00    6.20
 -12  11   1    2.70    8.30
   1 -12   1   16.90   10.20
   1 -12   1   -2.50    7.60
   0  11  -1   52.49    7.30
 -11   0  -1   47.00   13.10
  11 -11  -1   49.90   10.40
   0  11  -1   51.69    7.60
   0 -11   1   38.80   11.40
  11   0   1   80.09   12.20
 -11  11   1   50.29    9.60
   1  10  -1   11.50    5.50
  10 -11  -1   20.80    7.60
   1  10  -1   14.90    6.70
 -11   1  -1    4.00    9.70
 -11   1  -1    6.90    5.30
  11  -1   1   11.90    6.20
 -10  11   1   13.60    4.30
  -1 -10   1    8.60    9.30
 -10  11   1    6.20    7.10
  11  -1   1    7.30    6.50
 -11   2  -1  120.89   17.90
   9 -11  -1  129.79   12.70
   2   9  -1  123.89   11.60
 -11   2  -1  120.59    9.30
  11  -2   1  104.99   11.80
  -2  -9   1   97.39   15.70
  11  -2   1  106.19   11.70
  -9  11   1  102.79    8.40
  -9  11   1  142.29   13.40
  -2  -9   1  114.49   12.30
 -11   3  -1    4.90    3.80
   8 -11  -1   -1.10    6.30
 -11   3  -1   14.70    8.70
   3   8  -1    4.50    5.50
  11  -3   1    0.90    5.80
  -3  -8   1    4.50    5.90
  -3  -8   1    1.10    7.90
  11  -3   1   -4.20    5.30
  -8  11   1    2.10    6.00
   7 -11  -1   35.50    7.20
   4   7  -1   28.70    6.00
 -11   4  -1   29.10    8.50
  11  -4   1   35.30    6.90
  -4  -7   1   42.70    9.70
  -7  11   1   22.60    7.80
  -4  -7   1   39.40    7.00
  11  -4   1   38.50    6.40
  -7  11   1   44.60    6.70
   5   6  -1  311.57   17.70
   6 -11  -1  316.27   18.30
 -11   5  -1  320.27   21.50
  -6  11   1  309.77   18.50
  -5  -6   1  303.67   16.80
  -6  11   1  315.27   15.00
  11  -5   1  332.07   17.70
  -5  -6   1  345.07   21.10
  11  -5   1  311.27   17.60
   6   5  -1  316.07   17.50
 -11   6  -1  292.17   20.60
   5 -11  -1  321.97   17.90
  11  -6   1  337.37   17.70
  -6  -5   1  342.17   21.10
  -5  11   1  305.27   19.10
  11  -6   1  315.07   17.30
  -6  -5   1  295.97   16.40
  -5  11   1  337.17   15.50
   7   4  -1   16.90    5.90
   4 -11  -1   35.50    6.90
 -11   7  -1   32.90    8.90
  -4  11   1   35.00    5.70
  -4  11   1   24.40    5.40
  -7  -4   1   26.50    9.00
  -4  11   1   32.20    7.60
  11  -7   1   45.30    7.60
  -7  -4   1   33.40    6.10
  11  -7   1   36.10    6.10
   8   3  -1   -3.80    5.80
   3 -11  -1    7.90    7.40
 -11   8  -1   14.20    7.90
   3 -11  -1   -2.50    6.10
  -3  11   1    2.60    5.00
  11  -8   1    4.20    6.30
  -8  -3   1    2.00    4.80
  -8  -3   1   -0.90    8.60
  11  -8   1    7.80    5.10
  -3  11   1    4.30    4.60
   2 -11  -1  101.29   12.20
   2 -11  -1  100.09   14.90
 -11   9  -1  112.29   13.90
   9   2  -1  127.49   11.50
  11  -9   1  121.49   10.50
  -9  -2   1  113.09   17.30
  -2  11   1   86.79   10.60
  -9  -2   1  130.79   10.20
  -2  11   1   85.29   10.00
  11  -9   1  132.39   13.10
 -11  10  -1   17.30    7.50
   1 -11  -1   12.70    6.50
  10   1  -1   17.50    6.50
   1 -11  -1   14.60    8.50
  11 -10   1    9.30    5.70
 -10  -1   1   14.90    5.40
  -1  11   1   18.00    5.80
 -10  -1   1    2.30   10.20
  11 -10   1   12.00    7.80
  -1  11   1    3.90    5.70
 -11  11  -1   43.20    9.50
   0 -11  -1   64.69   12.60
  11   0  -1   42.90    8.30
  11 -11   1   54.29    7.20
 -11   0   1   44.70   11.80
   0  11   1   44.00    7.60
  11 -11   1   47.50    9.20
 -11   0   1   47.00    6.80
   0  11   1   33.20    7.10
 -11  12  -1    8.50    8.50
  12  -1  -1  -10.50    7.80
  -1 -11  -1  -11.90   10.80
  12  -1  -1   13.90    9.00
   1  11   1    6.00    5.90
   1  11   1    1.70    7.00
 -12   1   1   25.00   11.10
 -12   1   1   11.70    5.90
  11 -12   1    0.40    8.10
  13  -2  -1   52.69   10.60
 -11  13  -1   40.90   10.80
  -2 -11  -1   52.39   14.80
  13  -2  -1   29.70    9.40
 -13   2   1   55.79   13.40
   2  11   1   59.79    8.50
  11 -13   1   54.79   11.20
   2  11   1   54.49    8.30
 -13   2   1   73.19   10.30
  -3 -11  -1    1.00   15.20
  14  -3  -1    1.90   11.00
 -14   3   1   -6.20    6.90
   3  11   1   -6.10    6.90
  11 -14   1    5.20   10.50
   3  11   1    1.70    8.30
 -14   3   1    2.50   12.80
  15  -4  -1   32.30   13.00
  -4 -11  -1   39.40   12.30
 -11  15  -1   26.20   12.00
  -4 -11  -1  -13.20   17.10
   4  11   1   18.00    9.70
  11 -15   1   26.00   13.20
 -15   4   1    1.50   15.10
 -12  -2  -1   35.50   16.90
 -12  -2  -1   -1.30    8.80
  -2  14  -1    0.30    8.60
  14 -12  -1   16.10   11.30
   2 -14   1   13.20   13.50
 -14  12   1   12.20   10.80
  12   2   1   12.10    9.30
 -12  -1  -1   94.89   12.80
  13 -12  -1  106.39   14.50
 -12  -1  -1   93.89   17.20
  -1  13  -1   91.49   12.40
  -1  13  -1   81.19   14.00
   1 -13   1   89.29   15.20
 -13  12   1  103.19   16.10
  12   1   1   78.49   11.50
 -12   0  -1   21.80   13.70
   0  12  -1   -2.50    7.30
 -12  12   1   -6.00    9.70
   0 -12   1   13.40   12.40
  12   0   1   14.50    8.20
  11 -12  -1   20.80    9.80
 -12   1  -1    6.00   11.80
 -12   1  -1   11.40    6.40
   1  11  -1    9.50    7.40
 -11  12   1   -7.80    8.30
  12  -1   1    7.20    6.70
  -1 -11   1    0.30   11.00
  -1 -11   1   -3.10    8.80
 -12   2  -1   87.79    9.40
  10 -12  -1  120.69   14.60
 -12   2  -1   70.59   13.20
   2  10  -1   85.19   12.20
  -2 -10   1   85.89   13.40
 -10  12   1   65.89    8.70
  12  -2   1   81.49   12.10
  -2 -10   1   79.89   10.50
  12  -2   1   76.69    9.00
 -10  12   1  115.79   13.90
   3   9  -1    8.90    6.50
 -12   3  -1   24.50   10.20
 -12   3  -1    1.50    4.60
   9 -12  -1    7.70    7.50
  -9  12   1    1.60    4.70
  12  -3   1    8.90    6.50
  -9  12   1   14.30    7.40
  12  -3   1    1.70    7.20
  -3  -9   1   11.70    6.70
  -3  -9   1    3.30   10.40
   4   8  -1   11.40    6.80
 -12   4  -1   16.00    9.50
   8 -12  -1   14.90    7.90
  12  -4   1    0.60    6.30
  12  -4   1   22.20    7.70
  -4  -8   1    6.80    9.70
  -8  12   1    2.20    7.60
  -8  12   1   16.70    4.50
  -4  -8   1    9.40    6.40
 -12   5  -1   40.00    9.70
   7 -12  -1   23.60    7.80
   5   7  -1   22.70    7.10
  -7  12   1   26.90    7.80
  -5  -7   1   46.40   10.40
  -5  -7   1   34.60    7.40
  12  -5   1   18.00    5.90
  12  -5   1   20.80    7.60
   6   6  -1    0.20    6.10
 -12   6  -1  -15.30    8.20
  12  -6   1    1.80    5.90
  -6  -6   1    3.80    8.90
  -6  12   1   -8.60    6.90
  -6  12   1    7.00    4.90
  -6  -6   1   -3.80    5.50
   5 -12  -1   21.50    8.40
 -12   7  -1   24.10    9.70
   7   5  -1   27.70    6.90
  -5  12   1   23.80    8.40
  12  -7   1   34.70    8.20
  12  -7   1   29.00    6.90
  -7  -5   1   22.30    6.50
  -5  12   1   33.00    5.90
  -7  -5   1   29.00   10.90
   4 -12  -1   10.70    7.40
 -12   8  -1    5.20    7.90
   8   4  -1    2.50    6.10
  12  -8   1   13.50    7.30
  -8  -4   1    7.00    5.70
  -8  -4   1   17.60   10.20
  -4  12   1   16.60    5.70
  12  -8   1   15.80    6.20
  -4  12   1   12.90    7.70
 -12   9  -1    3.10    8.50
   9   3  -1   -6.80    6.60
   3 -12  -1   -8.00    8.50
   3 -12  -1    3.20    6.80
  -3  12   1   -6.60    5.20
  -3  12   1   -5.80    5.60
  12  -9   1    2.80    7.30
  -9  -3   1   13.20    5.90
  -9  -3   1  -13.30   11.00
  12  -9   1    2.90    5.90
  10   2  -1  102.79   12.40
 -12  10  -1   57.59   10.50
   2 -12  -1   76.09   12.60
   2 -12  -1   78.09    9.40
  -2  12   1   71.99   10.60
  -2  12   1   64.09   10.60
  12 -10   1   94.89   14.10
 -10  -2   1   79.89   10.60
  12 -10   1  102.59   11.20
 -10  -2   1  114.79   19.00
  11   1  -1    9.90    7.00
 -12  11  -1   17.40    8.60
   1 -12  -1   15.80   11.00
  12 -11   1    1.70    6.40
  12 -11   1   10.10    8.30
  -1  12   1   -3.90    6.50
  -1  12   1   -3.50    6.20
 -11  -1   1    0.00    6.00
 -11  -1   1    4.30   12.10
  12   0  -1   29.80    7.90
   0 -12  -1   -0.60   12.50
 -12  12  -1    1.80    9.00
 -12   0   1   16.90   12.00
 -12   0   1   18.70    6.90
  12 -12   1    0.50    9.90
   0  12   1   17.20    7.20
   0  12   1    6.50    6.30
  13  -1  -1   94.79   15.40
  -1 -12  -1   89.69   15.80
 -12  13  -1   76.29   12.90
 -13   1   1   80.09   12.40
 -13   1   1   82.19   16.00
   1  12   1   80.89   10.40
   1  12   1   89.09   12.40
  12 -13   1  114.49   17.40
  14  -2  -1   10.50   10.00
  -2 -12  -1   -3.50   15.10
 -12  14  -1   22.80   10.60
 -14   2   1   15.70    7.70
   2  12   1   -4.20   10.20
 -14   2   1   11.90   13.40
  12 -14   1   14.20   10.90
   2  12   1    0.10    7.40
  -1  14  -1    0.10    9.20
 -13  -1  -1    2.80   16.80
  14 -13  -1    3.30   11.80
 -13  -1  -1    0.20    9.00
 -14  13   1  -16.90   12.00
   1 -14   1  -26.20   16.00
   1 -14   1   11.10   11.50
  13   1   1   11.40    9.90
 -13   0  -1  145.09   14.10
  13 -13  -1  149.29   19.90
   0  13  -1  102.99   11.70
 -13   0  -1  112.39   19.30
  13   0   1   79.19   12.30
 -13  13   1  108.39   14.80
   0 -13   1  127.49   18.20
   0 -13   1  133.79   18.80
   1  12  -1   78.49   10.30
 -13   1  -1   78.19   16.80
  12 -13  -1   75.59   13.80
 -13   1  -1  100.09   12.60
  13  -1   1   92.49   15.60
  -1 -12   1   92.39   12.50
 -12  13   1  105.39   16.50
  -1 -12   1   93.69   16.00
 -13   2  -1   52.79    7.50
 -13   2  -1   73.59   14.30
   2  11  -1   55.39    9.80
  11 -13  -1   53.79   11.20
 -11  13   1   57.19   11.60
  13  -2   1   48.30    9.00
  -2 -11   1   60.39   10.40
  -2 -11   1   47.60   13.30
  10 -13  -1   -0.90    8.90
 -13   3  -1    1.60    5.80
   3  10  -1    6.70    7.40
 -13   3  -1   -0.20   11.30
  -3 -10   1   -2.70   12.30
 -10  13   1    3.00    8.20
  -3 -10   1    2.10    7.90
  13  -3   1    7.50    7.00
  13  -3   1    0.30    8.70
 -10  13   1   -0.90    5.30
   9 -13  -1   30.50    9.60
   4   9  -1   32.80    7.80
 -13   4  -1   10.00   11.60
  13  -4   1   21.10    8.40
  -9  13   1   34.30    6.20
  -4  -9   1   25.30    8.40
  13  -4   1   10.90    7.40
  -9  13   1   15.10    9.90
  -4  -9   1    1.70   11.80
   5   8  -1   47.80    8.30
   8 -13  -1   46.20    9.30
 -13   5  -1   42.80   11.90
  -8  13   1   37.00    9.40
  13  -5   1   53.79    9.60
  -5  -8   1   38.40    8.70
  -8  13   1   59.19    9.40
  -5  -8   1   58.59   12.20
  13  -5   1   33.40    8.10
   6   7  -1   15.00    7.10
 -13   6  -1   10.30   10.30
   7 -13  -1   14.00    8.70
  -7  13   1   22.00    9.20
  -6  -7   1   10.30    6.90
  -7  13   1   15.50    5.70
  -6  -7   1    9.40   11.20
  13  -6   1    2.60    7.00
  13  -6   1    3.70    8.20
   6 -13  -1   14.80    8.60
 -13   7  -1   10.10    9.30
   7   6  -1   13.40    7.40
  13  -7   1    5.10    8.50
  -6  13   1   10.90    5.90
  -6  13   1   11.30    8.50
  -7  -6   1   14.50    6.50
  -7  -6   1   14.90   11.30
  13  -7   1    8.80    7.00
   5 -13  -1   33.80    9.20
 -13   8  -1   27.50   10.70
   8   5  -1   36.00    7.70
  -8  -5   1   29.60   13.10
  -5  13   1   33.70   10.40
  -8  -5   1   30.50    7.00
  -5  13   1   52.39    7.30
  13  -8   1   35.20    9.70
  13  -8   1   31.80    7.60
 -13   9  -1    1.50    9.70
   4 -13  -1   33.00   10.60
   4 -13  -1   25.30    8.30
   9   4  -1   24.40    7.90
  -9  -4   1    9.80   12.20
  -9  -4   1   27.10    6.80
  13  -9   1   19.70    7.40
  -4  13   1   16.40    7.00
  13  -9   1   27.80    9.50
 -13  10  -1   14.10    9.00
   3 -13  -1   17.20    8.80
   3 -13  -1   -2.90   10.30
  13 -10   1    3.00    6.80
  -3  13   1    7.40    7.00
  13 -10   1    6.40    8.60
 -10  -3   1    0.80    7.00
 -10  -3   1   15.60   12.40
  -3  13   1    0.40    6.20
   2 -13  -1   47.50   12.50
 -13  11  -1   58.89   11.60
  11   2  -1   36.90    9.30
 -11  -2   1   59.39    8.00
 -11  -2   1   46.80   14.20
  13 -11   1   79.69   12.30
  -2  13   1   41.60    8.50
  13 -11   1   51.39    8.60
  -2  13   1   42.30    7.60
 -13  12  -1   87.39   13.30
   1 -13  -1   80.49   16.10
  12   1  -1  127.89   15.00
  13 -12   1   88.89   12.20
 -12  -1   1   87.99   16.70
  -1  13   1   77.19    9.90
  -1  13   1  106.49   12.70
 -12  -1   1   99.89   12.80
   0 -13  -1  135.89   19.20
  13   0  -1  132.29   16.90
 -13  13  -1  136.89   17.90
   0  13   1  125.59   14.70
  13 -13   1  155.48   19.10
   0  13   1   91.19   15.80
 -13   0   1  179.98   24.90
 -13   0   1  136.39   13.80
 -13  14  -1   -1.20   11.30
  14  -1  -1   10.30    9.80
  -1 -13  -1    2.60   17.20
  13 -14   1    4.40   11.40
   1  13   1   -8.50    7.70
 -14   1   1   -4.90   15.40
   1  13   1   11.40    9.40
 -14   1   1   -3.40    8.20
 -14   1  -1   37.80   16.00
  13 -14  -1   -0.60   11.60
   1  13  -1  -11.70    9.30
  -1 -13   1    5.10   16.10
  -1 -13   1    9.10   11.30
 -13  14   1   25.80   11.50
  14  -1   1  -14.50   10.40
   2  12  -1   21.60    9.40
 -14   2  -1   19.80   14.90
  12 -14  -1   -2.00   12.00
  -2 -12   1    1.10   14.70
  14  -2   1   13.80   10.00
 -12  14   1   25.20   10.90
  -2 -12   1    5.80   10.50
   3  11  -1    2.00    8.80
  11 -14  -1   -5.90   10.30
 -14   3  -1  -11.60   13.10
 -11  14   1   -1.60   10.10
  14  -3   1   -3.40    8.30
  -3 -11   1   -6.50   14.60
  -3 -11   1    4.20    9.80
  10 -14  -1    4.80   11.70
 -14   4  -1   41.10   13.30
  -4 -10   1   11.90   13.80
  14  -4   1    3.50   10.50
 -10  14   1   14.80   10.30
  -4 -10   1   19.80    9.20
 -14   5  -1   86.29   15.20
   9 -14  -1   93.29   13.20
   5   9  -1  111.79   14.00
  -5  -9   1   84.39   11.00
  -9  14   1   80.89   12.10
  -5  -9   1   95.09   15.40
  14  -5   1   86.59   11.90
  -9  14   1   86.39   11.70
  14  -5   1   74.19   10.70
   8 -14  -1   77.79   12.10
   6   8  -1   79.79   13.40
 -14   6  -1   60.29   14.50
  -6  -8   1   73.09   10.50
  -8  14   1   69.49   11.10
  -8  14   1   75.49   12.10
  -6  -8   1   31.50   14.40
  14  -6   1   61.09   11.60
 -14   7  -1   -0.10   10.90
   7 -14  -1    7.40    9.60
   7   7  -1   14.50    7.50
  -7  14   1  -14.00    9.10
  -7  14   1    1.50    6.10
  -7  -7   1    6.70    7.60
  14  -7   1   -2.90    7.70
  -7  -7   1   16.50   14.20
  14  -7   1  -11.40    9.50
   6 -14  -1   66.69   11.40
 -14   8  -1   58.39   13.40
   8   6  -1   47.90    9.00
  -6  14   1   62.69    8.60
  -8  -6   1   58.79    9.00
  -6  14   1   46.10   11.70
  14  -8   1   57.19   11.80
  14  -8   1   55.09    9.80
  -8  -6   1   45.30   15.00
   5 -14  -1   94.39   12.50
   9   5  -1   64.79    9.90
 -14   9  -1   78.29   13.60
  14  -9   1   70.99   12.90
  -9  -5   1   76.09   15.60
  -5  14   1   72.29    9.40
  14  -9   1   70.69    9.60
  -9  -5   1   81.79   12.40
   4 -14  -1   19.60   13.10
 -14  10  -1   16.10   11.60
   4 -14  -1    3.70   10.40
 -10  -4   1   16.90   14.00
  -4  14   1   21.70    7.70
  14 -10   1   19.40    8.50
  11   3  -1   -5.70    8.80
   3 -14  -1  -11.80   12.50
 -14  11  -1   -6.10   10.90
  14 -11   1   -1.50    8.60
  -3  14   1   13.40    7.80
  14 -11   1   18.80   11.30
 -11  -3   1  -14.90    7.50
 -11  -3   1    4.60   15.20
 -14  12  -1    4.80   10.80
   2 -14  -1   22.60   14.20
  -2  14   1   -1.20    7.60
  -2  14   1   -4.70    8.40
  14 -12   1   34.70   11.70
 -12  -2   1   -7.60    7.90
 -12  -2   1   -1.80   14.70
 -14  13  -1  -12.90   11.20
  13   1  -1  -19.40   10.00
   1 -14  -1   -6.90   16.00
  14 -13   1   22.00   12.80
 -13  -1   1   12.10   15.60
  -1  14   1    3.80    8.30
  -1  14   1   -6.30    8.80
 -13  -1   1    6.40    8.60
   4  11  -1   25.90    9.60
 -15   4  -1   20.60   14.90
  11 -15  -1   20.80   13.60
 -11  15   1   34.30   12.60
  -4 -11   1   24.10   17.80
  15  -4   1   11.20    9.80
  -4 -11   1   38.90   11.40
  10 -15  -1   60.59   14.10
   5  10  -1   36.90   10.20
 -15   5  -1   31.10   15.50
  15  -5   1   49.70   12.50
  15  -5   1   45.90   10.60
  -5 -10   1   50.19   11.10
 -10  15   1   53.09   11.80
  -5 -10   1   89.29   17.80
   6   9  -1   19.00    9.20
   9 -15  -1    9.50   11.70
 -15   6  -1   -1.20   12.60
  15  -6   1    4.30    9.60
  -9  15   1   -6.90   11.30
  -9  15   1   17.70    7.90
  -6  -9   1    6.10    9.50
  -6  -9   1   -9.10   15.70
  15  -6   1    3.90   11.50
 -15   7  -1   19.00   14.30
   7   8  -1   49.80    9.50
   8 -15  -1   47.90   12.70
  -8  15   1   36.30    8.20
  15  -7   1   30.70   12.00
  -7  -8   1   58.99   17.00
  15  -7   1   26.00   10.10
  -7  -8   1   44.80   10.00
  -8  15   1   39.30   12.90
   8   7  -1   31.40    9.80
 -15   8  -1   26.50   13.10
   7 -15  -1   57.59   12.60
  15  -8   1   23.90    9.90
  -7  15   1   31.90    9.10
  -8  -7   1   40.80   16.70
  -8  -7   1   27.70    9.60
  -7  15   1   26.20   12.00
  15  -8   1   44.90   12.50
   9   6  -1    6.30    8.70
   6 -15  -1   20.40   11.40
   6 -15  -1   11.70   12.40
 -15   9  -1    9.10   12.30
  -6  15   1    1.50    8.20
  15  -9   1   -2.90    9.00
  15  -9   1    6.50   11.70
  -9  -6   1   -6.60    8.70
  -9  -6   1   41.50   15.50
   5 -15  -1   46.90   12.60
  10   5  -1   45.20   10.30
 -15  10  -1   43.60   12.50
   5 -15  -1   25.80   14.70
 -10  -5   1   54.79   10.00
 -10  -5   1   27.80   18.10
  15 -10   1   49.10   13.50
  15 -10   1   33.60   10.60
  -5  15   1   57.39    9.70
 -15  11  -1   23.10   12.60
  11   4  -1   30.30    9.90
   4 -15  -1   56.59   15.30
  15 -11   1   12.10   12.50
  15 -11   1   22.30   10.30
  -4  15   1    4.80    8.50
 -11  -4   1   44.60   17.10
 -11  -4   1   14.10    9.70
   0   0  -2 2883.51  108.19
   0   0  -2 3108.49  119.69
   0   0  -2 2871.91  112.49
   0   0  -2 3132.09  119.39
   0   0   2 3255.37  119.29
   0   0   2 2797.92  108.09
   0   0   2 3221.78  119.79
   0   0   2 3094.59  112.49
   1  -1  -2    5.00    1.00
   1  -1  -2    5.00    1.20
   0   1  -2    7.70    1.90
  -1   0  -2    5.20    1.80
  -1   0  -2    4.50    1.60
  -1   0  -2    4.10    0.90
   0   1  -2    5.10    1.20
  -1   0  -2    3.40    1.00
   1  -1  -2    4.70    1.40
   0   1  -2    4.80    1.00
  -1   1   2    4.00    0.90
   1   0   2    3.40    1.50
   1   0   2    3.40    0.80
   1   0   2    5.60    1.40
   0  -1   2    4.90    0.90
   0  -1   2    4.00    1.20
  -1   1   2    4.50    1.40
  -1   1   2    4.70    1.20
   1   0   2    3.90    1.60
   0  -1   2    3.70    1.60
   0  -1  -2    5.20    1.30
   0  -1  -2    4.00    0.80
   1   0  -2    4.50    1.50
   0  -1  -2    4.20    1.40
   1   0  -2    7.20    1.50
   1   0  -2    5.50    1.30
  -1   1  -2    5.30    1.50
  -1   1  -2    3.50    1.00
  -1   1  -2    7.20    2.30
   0   1   2    6.40    1.20
   1  -1   2    7.40    2.10
   0   1   2    4.90    1.10
  -1   0   2    2.90    1.30
  -1   0   2    5.40    1.10
   0   1   2    5.00    1.30
  -1   0   2    4.40    1.00
   1  -1   2    6.20    0.90
   0   1   2    5.40    1.60
   1  -1   2    3.50    1.50
   1  -1   2    4.00    1.00
  -1  -1  -2    8.60    1.40
  -1   2  -2    3.90    1.00
  -1  -1  -2    5.20    1.90
  -1   2  -2    3.70    1.20
  -1  -1  -2    5.80    1.20
  -1   2  -2    6.80    1.40
   2  -1  -2    5.20    1.10
  -1   2  -2    5.60    2.50
   2  -1  -2    3.70    1.40
   2  -1  -2    2.80    1.40
   1  -2   2    7.30    1.50
   1  -2   2    3.00    0.90
  -2   1   2    4.60    1.30
   1   1   2    4.70    1.00
   1  -2   2    1.30    1.40
   1   1   2    4.70    1.10
   1  -2   2    4.70    2.50
   1   1   2    7.00    1.90
  -2   1   2    5.30    1.60
  -2   1   2    5.10    1.00
  -2  -1  -2   98.89    6.50
  -1   3  -2   89.69    6.90
   3  -2  -2   97.39    5.30
  -2  -1  -2   96.79    4.60
  -1   3  -2   93.19    4.80
   3  -2  -2   96.99    5.70
  -1   3  -2  108.89    5.30
  -3   2   2   94.59    4.50
   1  -3   2   95.49    4.50
   2   1   2  101.99    4.50
   2   1   2   90.79    5.00
   1  -3   2   77.29    5.00
   1  -3   2   91.49    4.60
  -3   2   2   98.29    5.40
   0   2  -2   53.49    3.20
  -2   0  -2   58.49    2.80
   2  -2  -2   52.29    3.00
  -2   0  -2   55.19    4.60
   2  -2  -2   53.69    3.80
   2  -2  -2   61.49    3.70
   0   2  -2   51.99    5.00
  -2   0  -2   51.89    3.40
  -2   0  -2   61.09    4.40
  -2   2   2   57.49    3.70
  -2   2   2   56.89    2.90
   2   0   2   52.09    4.70
   0  -2   2   60.39    4.70
   2   0   2   58.89    4.50
   2   0   2   57.59    3.40
   0  -2   2   56.39    3.60
   0  -2   2   60.29    3.20
  -2   2   2   56.19    3.80
   1   1  -2    4.60    1.20
   1  -2  -2    5.40    1.50
  -2   1  -2    3.40    2.40
   1   1  -2    4.50    1.70
   1  -2  -2    5.60    1.50
  -2   1  -2    5.30    1.80
   1  -2  -2    3.60    0.90
   1   1  -2    5.00    1.30
  -2   1  -2    4.90    1.20
  -1  -1   2    3.90    1.30
   2  -1   2    5.20    1.20
  -1   2   2    5.40    1.60
   2  -1   2    7.00    2.70
  -1  -1   2    4.80    1.90
   2  -1   2    2.10    1.90
  -1  -1   2    4.80    1.10
  -1   2   2    3.80    1.50
   2   0  -2   57.79    3.70
  -2   2  -2   65.09    5.70
   2   0  -2   57.49    3.60
   0  -2  -2   59.79    4.00
   0  -2  -2   61.29    4.20
   2   0  -2   58.19    3.40
  -2   2  -2   56.09    3.30
  -2   2  -2   59.99    4.10
   0  -2  -2   54.99    3.10
   2   0  -2   49.90    3.10
  -2   0   2   56.39    3.10
  -2   0   2   59.99    3.50
   2  -2   2   44.60    4.40
   0   2   2   58.29    3.10
   2  -2   2   62.89    3.40
  -2   0   2   52.59    3.50
   0   2   2   55.59    3.20
  -2   0   2   54.49    3.70
   2  -2   2   55.19    5.50
  -2   3  -2  101.49    7.50
  -1  -2  -2   98.09    6.20
   3  -1  -2   91.59    5.10
  -2   3  -2   97.09    5.30
   3  -1  -2   93.19    4.80
  -1  -2  -2   76.19    4.90
   3  -1  -2   82.99    5.60
  -3   1   2   91.39    4.90
   1   2   2   94.59    4.50
   2  -3   2   86.89    5.50
  -3   1   2  108.99    5.50
   1   2   2   90.19    4.90
  -3   1   2   94.29    4.40
  -2   4  -2 2802.72  100.09
   4  -2  -2 2655.23   98.49
  -2   4  -2 2979.00  108.79
  -2   4  -2 2843.32  108.39
  -2  -2  -2 2772.42  109.59
  -4   2   2 2659.43  101.99
   2  -4   2 2517.65  101.69
   2   2   2 2792.32  102.09
   2   2   2 2675.73  108.89
  -4   2   2 2842.32  108.89
  -3  -2  -2  328.97   15.70
  -2   5  -2  303.07   12.30
  -2   5  -2  295.77   13.50
   5  -3  -2  291.77   13.00
  -2   5  -2  316.67   13.50
  -2   5  -2  288.17   15.50
  -5   3   2  293.07   12.20
   3   2   2  298.97   13.70
   3   2   2  307.67   12.50
  -5   3   2  295.57   14.30
   4  -3  -2    6.80    2.00
  -1   4  -2    7.60    1.90
  -1   4  -2    8.40    1.90
  -1   4  -2    5.60    3.70
  -3  -1  -2    3.80    2.70
  -4   3   2    6.80    2.40
   3   1   2   13.40    2.20
   1  -4   2    2.10    2.00
  -4   3   2    4.80    1.40
   3   1   2    6.40    1.80
  -3   0  -2  402.46   15.90
  -3   0  -2  434.36   16.50
   0   3  -2  426.56   16.90
   3  -3  -2  424.16   16.30
  -3   0  -2  394.26   18.50
   0   3  -2  401.16   17.20
   0   3  -2  420.96   17.20
  -3   3   2  435.36   17.70
   3   0   2  413.26   16.50
   3   0   2  408.66   15.80
  -3   3   2  405.26   15.90
   0  -3   2  407.46   16.40
   3   0   2  386.46   17.30
  -3   1  -2   96.69    6.30
   1   2  -2   99.49    5.20
   2  -3  -2   91.09    5.10
   1   2  -2   91.89    6.00
  -3   1  -2  100.79    6.60
  -2   3   2  101.79    5.50
  -2   3   2   87.79    4.30
  -1  -2   2   88.59    4.70
   3  -1   2   92.09    6.90
   3  -1   2   90.39    5.00
   2   1  -2   92.29    5.40
   2   1  -2   99.59    5.10
  -3   2  -2  102.59    7.20
   1  -3  -2   91.59    4.70
  -3   2  -2   97.39    6.00
  -1   3   2   85.99    4.30
   3  -2   2   96.29    4.90
  -1   3   2   77.39    4.60
  -2  -1   2   75.89    4.80
  -2  -1   2   84.89    4.60
  -1   3   2   98.49    5.50
  -3   3  -2  414.66   17.80
   3   0  -2  365.26   17.40
   0  -3  -2  436.16   18.00
   0  -3  -2  388.96   15.20
   0  -3  -2  368.46   16.80
   3   0  -2  426.66   16.00
  -3   3  -2  434.86   17.80
   3   0  -2  440.76   17.20
   0   3   2  404.06   16.00
   0   3   2  363.76   15.10
   0   3   2  416.36   16.90
  -3   0   2  418.46   17.40
   3  -3   2  425.66   17.00
  -3   0   2  402.26   16.00
  -1  -3  -2    6.50    2.60
  -3   4  -2    4.30    2.20
  -3   4  -2   10.20    4.20
   4  -1  -2    8.30    2.00
   4  -1  -2    4.70    2.00
  -4   1   2    6.40    2.30
   1   3   2    7.10    1.90
   1   3   2    4.40    1.60
   5  -2  -2  285.97   12.60
  -3   5  -2  299.57   13.40
  -3   5  -2  281.37   15.60
  -2  -3  -2  304.17   15.00
   5  -2  -2  282.37   12.90
  -5   2   2  312.37   14.20
   2   3   2  295.17   13.30
  -5   2   2  293.67   12.00
   2   3   2  285.87   12.30
   6  -3  -2   67.89    5.40
  -3   6  -2   78.59    4.60
  -3  -3  -2   54.39    7.70
  -3   6  -2   84.29    6.00
  -3   6  -2   82.29    9.30
   6  -3  -2   72.39    6.00
   3   3   2   63.59    4.70
  -6   3   2   72.79    7.20
  -6   3   2   70.49    4.50
   3   3   2   75.59    6.00
   7  -4  -2  204.68   10.30
  -4  -3  -2  212.28   13.30
  -3   7  -2  202.48   15.50
  -3   7  -2  205.88   10.60
   7  -4  -2  196.38   10.80
  -3   7  -2  207.08    9.40
  -3   7  -2  205.28   10.80
   4   3   2  199.38   10.90
  -7   4   2  210.18    9.10
  -7   4   2  193.98   11.70
   4   3   2  192.28    9.50
  -2   6  -2  404.76   16.60
   6  -4  -2  393.96   17.30
  -2   6  -2  422.96   20.30
  -2   6  -2  426.16   17.90
  -2   6  -2  428.36   18.10
  -4  -2  -2  388.66   19.90
  -6   4   2  408.26   19.00
   4   2   2  413.16   18.30
   4   2   2  418.46   16.70
  -6   4   2  388.56   16.30
   5  -4  -2   55.39    5.20
  -1   5  -2   60.69    7.30
  -4  -1  -2   58.59    6.90
  -1   5  -2   60.39    4.70
  -1   5  -2   50.69    3.90
  -1   5  -2   55.09    4.50
   4   1   2   52.29    4.90
   4   1   2   53.49    3.70
  -5   4   2   56.09    5.30
  -5   4   2   46.00    3.40
  -4   0  -2  342.97   16.30
   0   4  -2  334.37   14.40
   4  -4  -2  318.77   13.80
   0   4  -2  328.37   15.30
  -4   4   2  325.37   13.00
   0  -4   2  319.27   13.80
   4   0   2  324.87   14.50
   4   0   2  333.77   13.10
  -4   4   2  332.37   14.90
   3  -4  -2    7.80    2.20
   1   3  -2    7.70    1.90
   1   3  -2    0.80    4.00
  -4   1  -2    7.70    3.70
  -4   1  -2    3.00    2.70
   4  -1   2    4.60    1.60
  -3   4   2   11.20    1.80
   4  -1   2    4.40    4.40
  -1  -3   2    5.80    1.80
  -1  -3   2    5.70    1.90
  -3   4   2    3.10    2.10
   2   2  -2 2838.62  106.09
   2  -4  -2 2663.63   95.79
  -4   2  -2 2924.11   97.49
  -4   2  -2 2767.72  106.89
   2   2  -2 2487.95  105.29
  -2  -2   2 2560.84  105.49
  -2   4   2 2743.43   99.39
  -2   4   2 2753.22  105.99
   4  -2   2 2713.43  106.09
  -2  -2   2 2318.97   95.39
  -2  -2   2 2724.93   99.79
   3   1  -2    3.80    2.40
  -4   3  -2    8.00    4.10
  -4   3  -2    6.00    2.40
   1  -4  -2    5.40    1.90
   3   1  -2    2.80    2.40
   3   1  -2    8.30    2.20
  -3  -1   2    5.40    1.70
  -1   4   2    4.60    2.10
  -3  -1   2    4.60    2.30
  -1   4   2    9.10    2.20
  -4   4  -2  350.96   15.40
   4   0  -2  331.27   14.50
   0  -4  -2  310.87   12.80
   0  -4  -2  329.37   15.50
   4   0  -2  339.47   13.60
  -4   4  -2  340.37   16.60
  -4   0   2  322.17   13.50
   4  -4   2  340.37   14.30
   0   4   2  320.27   13.50
   0   4   2  319.97   14.20
  -4   0   2  338.27   15.30
  -1  -4  -2   48.30    6.00
   5  -1  -2   58.09    4.90
  -4   5  -2   57.09    5.50
   5  -1  -2   45.20    4.90
  -4   5  -2   66.69    8.10
  -5   1   2   53.89    5.70
   1   4   2   54.49    5.10
   1   4   2   48.10    4.10
   4  -5   2   56.09    4.30
  -5   1   2   56.79    3.80
  -4   6  -2  391.66   20.40
   6  -2  -2  397.36   17.60
  -4   6  -2  392.36   18.10
  -2  -4  -2  418.26   19.60
   6  -2  -2  402.06   16.80
   2   4   2  393.86   16.60
  -6   2   2  414.26   19.00
   2   4   2  418.36   18.10
   4  -6   2  403.76   17.40
  -6   2   2  400.06   16.20
   7  -3  -2  191.48   10.30
  -4   7  -2  207.38   15.90
   7  -3  -2  208.78   10.60
  -4   7  -2  207.58   11.00
  -3  -4  -2  198.88   12.70
   3   4   2  210.98   11.20
   3   4   2  186.48    9.50
  -7   3   2  216.38   12.00
  -7   3   2  187.48    8.90
  -4   8  -2 2863.71  116.59
  -4   8  -2 3216.98  109.29
  -4   8  -2 2931.41  109.99
  -4  -4  -2 2695.13  118.49
   8  -4  -2 2898.61  116.39
   8  -4  -2 2857.81  106.19
   4   4   2 2957.60  109.79
   4   4   2 3019.70  117.19
  -8   4   2 2933.21  108.99
  -8   4   2 2922.71  117.79
  -5  -4  -2    4.20    6.30
   9  -5  -2   -1.50    4.40
   9  -5  -2   -1.50    3.80
  -4   9  -2   -3.70    9.70
  -4   9  -2    2.20    3.10
  -4   9  -2    5.90    4.30
  -9   5   2    8.50    2.80
   5   4   2    3.10    2.80
  -9   5   2    2.40    5.50
   8  -5  -2   74.99    7.70
  -3   8  -2   71.99    7.10
  -3   8  -2   76.89    7.10
  -3   8  -2   76.19    6.00
  -5  -3  -2   75.99    9.80
  -3   8  -2  102.29   15.30
  -8   5   2   64.89    5.20
  -8   5   2   71.09    8.10
   5   3   2   72.79    7.10
   5   3   2   81.09    5.80
  -2   7  -2  522.85   25.40
  -2   7  -2  530.85   23.20
  -2   7  -2  574.44   23.10
  -5  -2  -2  562.34   25.90
  -2   7  -2  514.95   21.40
   7  -5  -2  516.85   22.10
  -7   5   2  511.55   20.80
   5   2   2  536.05   21.40
  -7   5   2  515.25   24.00
   5   2   2  535.55   23.40
  -1   6  -2   40.90    5.00
   6  -5  -2   35.80    5.70
  -1   6  -2   46.40    4.90
  -1   6  -2   32.40    3.90
  -5  -1  -2   37.20    5.70
  -1   6  -2   41.10    7.30
   5   1   2   37.50    5.10
   5   1   2   37.50    3.40
  -6   5   2   31.40    5.40
  -6   5   2   31.70    3.20
  -5   0  -2 1218.68   52.39
   0   5  -2 1304.27   47.90
   5  -5  -2 1311.47   46.80
   0   5  -2 1211.48   50.39
   5   0   2 1234.68   47.00
  -5   5   2 1277.67   47.00
   5   0   2 1219.08   50.69
   0  -5   2 1229.58   50.49
  -5   5   2 1249.47   51.09
   1   4  -2   58.39    4.70
  -5   1  -2   51.09    7.00
  -5   1  -2   59.49    8.10
   4  -5  -2   54.59    5.20
   1   4  -2   56.29    6.10
  -5   1  -2   51.49    3.70
  -4   5   2   50.89    3.50
  -1  -4   2   53.49    5.10
  -1  -4   2   49.70    4.50
  -4   5   2   55.09    5.20
   5  -1   2   46.40    4.30
   3  -5  -2  286.77   12.60
   2   3  -2  308.27   13.60
   2   3  -2  311.87   13.40
   2   3  -2  256.97   13.20
  -5   2  -2  311.17   15.20
  -5   2  -2  314.57   15.60
  -2  -3   2  278.67   12.70
   5  -2   2  296.97   13.30
  -3   5   2  303.87   13.80
  -3   5   2  292.57   12.00
  -2  -3   2  278.77   13.60
   3   2  -2  307.67   13.70
  -5   3  -2  339.37   16.20
  -5   3  -2  301.97   15.10
   3   2  -2  290.27   14.00
   2  -5  -2  294.97   12.70
  -3  -2   2  290.17   13.90
  -2   5   2  306.27   14.10
  -2   5   2  293.57   12.40
   5  -3   2  299.57   13.40
  -3  -2   2  288.67   12.70
  -5   4  -2   63.89    8.50
  -5   4  -2   47.20    5.90
   4   1  -2   55.99    5.10
   4   1  -2   46.90    4.70
   1  -5  -2   45.90    4.20
  -1   5   2   56.49    5.10
  -1   5   2   49.60    3.90
  -4  -1   2   56.69    6.10
   5  -4   2   54.99    4.30
  -4  -1   2   47.70    4.20
   5   0  -2 1281.07   45.80
   0  -5  -2 1224.18   51.39
   5   0  -2 1268.07   50.49
   0  -5  -2 1166.08   46.80
  -5   5  -2 1315.67   49.60
  -5   5  -2 1294.17   51.29
   0   5   2 1276.57   50.09
   0   5   2 1194.38   47.20
  -5   0   2 1201.88   47.20
   5  -5   2 1227.48   50.09
  -5   0   2 1247.18   51.19
  -5   6  -2   38.80    5.50
  -5   6  -2   45.30    8.20
   6  -1  -2   41.30    5.40
   6  -1  -2   34.60    4.30
  -1  -5  -2   36.50    6.30
  -6   1   2   36.70    5.00
   5  -6   2   45.70    4.60
   1   5   2   42.20    5.50
   1   5   2   29.60    4.00
  -6   1   2   41.40    3.80
  -2  -5  -2  543.55   25.20
   7  -2  -2  529.05   23.00
   7  -2  -2  545.65   21.80
  -5   7  -2  527.95   23.60
  -5   7  -2  545.75   26.30
  -7   2   2  522.35   21.10
   5  -7   2  531.65   22.70
  -7   2   2  550.44   24.60
   2   5   2  511.35   23.10
   2   5   2  509.85   21.60
  -5   8  -2   90.39   11.70
   8  -3  -2   78.79    7.30
   8  -3  -2   81.99    7.80
  -3  -5  -2   77.39   10.00
  -5   8  -2   94.19    8.00
  -5   8  -2   84.29    5.60
   5  -8   2   68.99    6.90
   3   5   2   85.49    6.20
   3   5   2   81.49    7.60
  -8   3   2   92.29    9.40
  -8   3   2   79.59    5.60
  -5   9  -2    2.40    2.90
   9  -4  -2   -0.10    3.80
  -5   9  -2    5.40   10.70
  -4  -5  -2    7.10    6.30
  -5   9  -2   -7.30    3.90
   9  -4  -2    5.40    4.20
   4   5   2    0.90    3.40
   5  -9   2    2.30    3.40
  -9   4   2   -1.50    5.50
  -9   4   2    1.40    3.00
   4   5   2    6.80    4.00
  -5  10  -2    9.00    5.70
  10  -5  -2    9.10    4.50
  -5  10  -2   14.20    3.70
  10  -5  -2   17.40    5.60
  -5  -5  -2   16.10    7.90
  -5  10  -2   38.90   13.10
   5 -10   2   22.60    4.30
 -10   5   2   17.50    7.20
   5   5   2   15.50    3.80
   5   5   2   18.50    5.10
 -10   5   2   18.00    3.40
  11  -6  -2   21.50    7.00
  -5  11  -2   24.30    6.60
  -5  11  -2    3.80   15.20
  -6  -5  -2   29.10    9.70
  11  -6  -2   22.40    5.90
  -5  11  -2   22.30    5.00
 -11   6   2   30.20    8.80
   6   5   2   17.30    5.00
 -11   6   2   20.00    4.10
   6   5   2   23.00    5.70
  -4  10  -2   56.39    8.90
  -4  10  -2   59.39   14.70
  -6  -4  -2   35.40    9.00
  10  -6  -2   41.80    7.20
  -4  10  -2   47.40    5.20
  10  -6  -2   43.90    5.70
 -10   6   2   44.20    5.30
 -10   6   2   51.79    8.50
   6   4   2   40.30    6.20
   6   4   2   35.70    6.30
  -3   9  -2    5.10    3.20
   9  -6  -2    6.00    4.70
  -6  -3  -2   11.40    7.60
  -3   9  -2    6.30    4.40
  -3   9  -2    3.90    9.80
  -3   9  -2   -3.00    4.00
  -9   6   2    4.50    2.60
   6   3   2    5.90    4.00
   6   3   2    4.00    3.00
  -9   6   2    1.50    6.00
  -6  -2  -2  212.78   15.00
  -2   8  -2  202.98   18.10
  -2   8  -2  242.38   12.10
  -2   8  -2  224.28   12.20
  -2   8  -2  215.78   10.80
   6   2   2  238.48   12.50
  -8   6   2  210.98    9.80
  -8   6   2  224.48   13.20
  -1   7  -2   36.70    5.40
  -1   7  -2   28.40    4.20
  -6  -1  -2   26.10    5.90
  -1   7  -2   26.10    3.60
   7  -6  -2   28.90    4.90
  -1   7  -2   35.80    8.00
  -7   6   2   26.90    3.60
   6   1   2   24.40    3.70
   6   1   2   25.00    4.20
  -7   6   2   24.60    4.50
   0   6  -2 4682.83  172.58
   0   6  -2 4602.24  167.38
  -6   0  -2 4749.82  185.48
   0   6  -2 4527.35  183.48
   6  -6  -2 4831.42  166.78
  -6   0  -2 4791.72  172.38
  -6   6   2 4619.54  183.78
  -6   6   2 4573.84  171.88
   6   0   2 4540.75  183.98
   0  -6   2 4588.24  183.28
   1   5  -2   34.40    6.20
  -6   1  -2   36.80    6.00
   5  -6  -2   32.10    4.30
   1   5  -2   34.40    5.00
  -6   1  -2   45.10    3.80
  -5   6   2   42.80    3.50
   6  -1   2   36.60    4.80
   6  -1   2   34.20    4.80
  -1  -5   2   32.60    4.70
  -1  -5   2   45.00    5.90
  -5   6   2   44.50    5.50
  -6   2  -2  390.66   19.80
   4  -6  -2  382.96   16.70
   2   4  -2  399.56   17.60
   2   4  -2  409.46   18.20
  -2  -4   2  395.66   18.20
   6  -2   2  385.66   17.60
  -2  -4   2  395.56   16.90
  -4   6   2  412.86   18.10
  -4   6   2  404.86   16.00
  -6   3  -2   65.09    7.60
  -6   3  -2   84.49   10.00
   3  -6  -2   66.29    5.70
   3   3  -2   69.69    7.50
   3   3  -2   74.29    6.20
  -3  -3   2   57.09    6.70
  -3   6   2   66.29    4.60
  -3  -3   2   61.39    5.10
   6  -3   2   73.99    5.40
   4   2  -2  421.96   18.10
   2  -6  -2  378.86   16.40
  -6   4  -2  399.56   19.20
  -6   4  -2  443.46   21.00
  -4  -2   2  405.86   16.80
   6  -4   2  395.06   17.60
  -2   6   2  391.56   16.40
  -4  -2   2  392.16   18.70
  -2   6   2  400.96   18.50
   5   1  -2   31.80    5.00
  -6   5  -2   35.60    7.60
   1  -6  -2   33.30    3.80
   5   1  -2   39.00    5.30
  -6   5  -2   39.80    6.30
   1  -6  -2   33.90    5.80
  -5  -1   2   34.90    5.30
  -5  -1   2   32.70    4.10
   6  -5   2   32.70    4.40
  -1   6   2   31.30    3.90
  -6   6  -2 4767.02  170.18
   6   0  -2 4678.63  165.88
   0  -6  -2 4466.05  184.78
  -6   6  -2 4799.52  184.58
   6   0  -2 4847.92  184.38
   0   6   2 4341.37  172.88
  -6   0   2 4733.53  184.68
   6  -6   2 4570.14  183.78
   0   6   2 4823.82  183.78
  -6   0   2 4594.44  172.88
   7  -1  -2   22.70    4.20
  -6   7  -2   24.60    8.70
   7  -1  -2   36.50    6.10
  -1  -6  -2   22.40    5.30
  -6   7  -2   29.50    4.80
   1   6   2   26.80    4.10
   1   6   2   23.40    3.70
   6  -7   2   31.90    5.10
  -2  -6  -2  242.38   15.10
  -6   8  -2  219.38   12.90
   8  -2  -2  237.48   12.10
   8  -2  -2  222.08   12.30
  -6   8  -2  226.58   19.40
   2   6   2  249.88   12.70
  -8   2   2  212.98   14.10
  -8   2   2  222.48   10.60
   6  -8   2  220.98   11.70
   2   6   2  213.08   11.30
   9  -3  -2    4.70    3.80
  -6   9  -2    7.90    2.90
  -6   9  -2   -2.90    8.50
  -6   9  -2   -2.80    5.20
   9  -3  -2    8.50    4.90
  -3  -6  -2    2.10    6.50
   3   6   2    2.70    3.60
  -9   3   2    6.70    2.90
  -9   3   2    9.60    5.80
   6  -9   2    6.00    3.70
   3   6   2   -5.40    4.30
  10  -4  -2   49.50    7.10
  10  -4  -2   55.19    8.60
  -6  10  -2   47.50   13.00
  -4  -6  -2   32.80    8.30
  -6  10  -2   51.69    6.20
  -6  10  -2   64.29    9.40
 -10   4   2   50.49    8.30
   6 -10   2   44.40    5.90
   4   6   2   36.10    5.60
 -10   4   2   48.20    6.10
  -6  11  -2   20.50   13.10
  -5  -6  -2   15.90    9.60
  11  -5  -2   20.00    6.90
  -6  11  -2   10.20    6.70
  -6  11  -2   24.30    4.70
  11  -5  -2   19.80    5.50
   5   6   2    9.80    6.20
 -11   5   2   22.70    4.30
 -11   5   2   19.20    7.70
   5   6   2   25.30    4.60
   6 -11   2   27.70    5.80
  12  -6  -2  562.84   26.50
  12  -6  -2  560.64   26.20
  -6  -6  -2  583.14   32.20
  -6  12  -2  577.84   27.90
  -6  12  -2  603.94   23.90
   6   6   2  551.94   24.50
   6 -12   2  529.75   25.80
   6   6   2  525.95   27.20
 -12   6   2  511.05   29.10
 -12   6   2  535.95   22.90
  -6  13  -2  -14.80    8.00
  -6  13  -2    1.70    5.70
  -7  -6  -2   -1.30    7.60
  13  -7  -2   -1.60    8.40
  -7  -6  -2    3.80   12.10
  13  -7  -2   -1.90    6.50
 -13   7   2  -10.60    9.40
 -13   7   2   -4.40    4.50
   6 -13   2    8.90    7.20
   6 -13   2    3.70    9.00
  -5  12  -2  103.89   11.60
  12  -7  -2  111.99   12.10
  12  -7  -2   97.59   13.60
  -5  12  -2  113.29   10.10
  -5  12  -2  135.79   19.50
  -7  -5  -2  108.89   12.50
  -7  -5  -2  104.69   15.00
 -12   7   2   87.69   14.90
   7   5   2  126.59   12.20
  -4  11  -2   -2.40    6.40
  11  -7  -2    5.30    6.50
  -4  11  -2    2.80   14.10
  -7  -4  -2   31.10    9.60
  -4  11  -2    9.40    4.60
  -7  -4  -2    5.80    6.00
  -4  11  -2   15.20    5.20
   7   4   2   -1.50    5.80
 -11   7   2    9.70    7.50
 -11   7   2    3.60    3.40
  -3  10  -2  213.88   23.70
  -3  10  -2  187.98   12.10
  -7  -3  -2  231.68   18.60
  10  -7  -2  194.28   13.90
  -7  -3  -2  190.98   12.20
  -3  10  -2  185.48   13.60
  -3  10  -2  218.08   11.50
 -10   7   2  196.28   14.80
 -10   7   2  190.08    9.80
   7   3   2  200.38   13.40
  -7  -2  -2   97.49    8.50
   9  -7  -2   98.89    9.90
  -7  -2  -2  117.49   14.10
  -2   9  -2  108.19    7.80
  -2   9  -2  105.99    9.40
  -2   9  -2  107.39   14.00
  -2   9  -2   97.79    8.90
   7   2   2  106.49    9.70
  -9   7   2   98.09   10.50
  -9   7   2  109.79    6.60
   8  -7  -2  111.19   10.20
  -1   8  -2  109.59    7.60
  -1   8  -2  110.89   15.50
  -1   8  -2  128.99    8.80
  -7  -1  -2  118.69    8.00
  -7  -1  -2  113.59   13.10
   1  -8   2   98.39    9.80
  -8   7   2  126.59   10.30
  -8   7   2  109.59    6.40
   7   1   2  111.49    9.20
   0   7  -2  161.08   14.70
   0   7  -2  147.49    8.40
  -7   0  -2  140.89   12.50
  -7   0  -2  158.58    8.50
   7  -7  -2  160.48   10.70
   0   7  -2  158.68    9.60
   7   0   2  168.68   10.00
   0  -7   2  143.69   10.50
  -7   7   2  130.89   10.10
  -7   7   2  153.48    7.50
   1   6  -2   26.50    4.00
  -7   1  -2   30.30    4.20
  -7   1  -2   32.20    6.60
   1   6  -2   33.00    7.60
   6  -7  -2   24.60    4.80
  -1  -6   2   24.70    4.20
   7  -1   2   32.70    5.60
  -1  -6   2   31.70    4.90
  -6   7   2   37.20    6.00
   7  -1   2   19.60    3.40
  -6   7   2   29.70    3.70
   2   5  -2  524.95   22.70
  -7   2  -2  523.25   25.10
   2   5  -2  509.65   22.60
   5  -7  -2  510.95   21.60
  -2  -5   2  515.25   21.80
  -5   7   2  540.75   20.70
  -5   7   2  529.25   23.30
  -2  -5   2  484.75   23.40
   7  -2   2  537.15   21.00
   7  -2   2  511.35   22.70
  -7   3  -2  184.68   12.90
   4  -7  -2  192.08   10.40
   3   4  -2  201.78   10.80
   3   4  -2  182.68   12.20
   7  -3   2  197.98   10.30
   7  -3   2  203.98   10.50
  -3  -4   2  200.18   11.70
  -4   7   2  199.58   10.90
  -3  -4   2  195.08   10.10
  -4   7   2  204.78    9.30
   3  -7  -2  182.48   10.10
  -7   4  -2  183.38   14.60
   4   3  -2  206.28   11.00
   4   3  -2  204.38   11.20
  -7   4  -2  197.48   12.10
  -3   7   2  204.58    9.30
  -4  -3   2  185.98    9.70
  -4  -3   2  177.28   11.50
   7  -4   2  201.98   10.30
  -3   7   2  218.38   11.20
   5   2  -2  583.14   23.40
  -7   5  -2  525.15   25.60
   5   2  -2  530.75   21.20
  -7   5  -2  543.65   24.60
   2  -7  -2  494.45   21.00
  -2   7   2  502.95   21.20
  -5  -2   2  526.85   21.60
  -5  -2   2  506.15   24.20
   7  -5   2  512.95   22.70
  -2   7   2  533.35   23.80
  -7   6  -2   26.20    4.80
   6   1  -2   22.10    3.90
  -7   6  -2   31.20    8.50
   1  -7  -2   21.10    3.80
   6   1  -2   22.50    4.30
   1  -7  -2   30.30    5.30
  -6  -1   2   19.40    5.50
  -6  -1   2   24.60    3.60
  -1   7   2   26.10    3.40
   7  -6   2   23.70    3.30
  -1   7   2   25.50    3.40
  -7   7  -2  157.78   10.70
   7   0  -2  156.98   10.10
   7   0  -2  157.98    9.50
   0  -7  -2  154.78   11.00
  -7   7  -2  159.98   15.70
  -7   0   2  161.48   12.10
   7  -7   2  156.78    9.10
  -7   0   2  149.19    8.50
   0   7   2  146.89    8.40
   0   7   2  160.78    9.30
   8  -1  -2  124.09    9.20
   8  -1  -2  141.69    9.70
  -1  -7  -2  105.49   11.60
  -7   8  -2  132.29   10.40
  -7   8  -2   83.79   13.10
   7  -8   2  108.79    8.00
   1   7   2  108.29    7.90
  -8   1   2  103.29   11.20
  -8   1   2  120.79    7.50
   1   7   2  119.39    9.30
  -7   9  -2   89.99   13.40
  -7   9  -2  109.39   10.90
   9  -2  -2  108.69    9.30
  -2  -7  -2  101.09   13.00
   9  -2  -2  103.39    9.60
   7  -9   2  126.19    8.60
   2   7   2   96.39    9.50
  -9   2   2  116.09    7.20
  -9   2   2  108.79   12.00
   2   7   2   93.79    8.30
  10  -3  -2  200.08   13.00
  -3  -7  -2  185.58   16.60
  -7  10  -2  187.28   14.20
  10  -3  -2  201.68   12.70
  -7  10  -2  214.78   21.50
   7 -10   2  204.98   12.10
 -10   3   2  216.18   10.60
   3   7   2  200.88   11.50
 -10   3   2  194.88   16.30
   3   7   2  180.78   12.70
  -7  11  -2    8.20    6.60
  11  -4  -2    5.30    5.90
  -7  11  -2   12.80    4.10
  -7  11  -2   12.30   13.20
  11  -4  -2    6.40    5.20
  -4  -7  -2    4.20    9.20
 -11   4   2   16.10    7.90
 -11   4   2   -1.90    4.00
   4   7   2   12.40    5.90
   4   7   2    0.10    4.00
   7 -11   2    2.60    5.10
  -5  -7  -2   89.09   13.70
  -7  12  -2   95.19    8.60
  12  -5  -2   90.19   13.30
  12  -5  -2  108.19   11.90
  -7  12  -2   80.59   13.00
 -12   5   2   96.99   16.00
   5   7   2  107.69    9.60
   7 -12   2   81.59    9.20
 -12   5   2  109.89    8.20
   5   7   2  101.69   11.90
  13  -6  -2   -3.10    8.30
  13  -6  -2    2.30    6.90
  -6  -7  -2   21.80   12.80
  -7  13  -2   -0.30    7.60
  -7  13  -2    1.50    5.70
   7 -13   2   -5.20    8.20
   6   7   2   11.30    7.30
 -13   6   2   -5.10    9.00
   7 -13   2   13.00    7.20
 -13   6   2   -2.40    4.80
   6   7   2    0.20    5.60
  -7  -7  -2   16.20    9.20
  -7  14  -2    4.20    9.50
  14  -7  -2    2.50    7.90
  14  -7  -2    8.30    9.90
  -7  14  -2   -4.50    6.60
  -7  -7  -2   -9.00   13.90
   7 -14   2    6.80    9.40
   7   7   2   11.40    8.10
 -14   7   2    8.00   11.10
   7 -14   2    2.40    8.20
  15  -8  -2   61.79   10.20
  -8  -7  -2   60.29   11.10
  15  -8  -2   74.09   13.90
  -7  15  -2   55.59   12.90
  -8  -7  -2   99.89   19.10
   7 -15   2   60.79   11.00
   8   7   2   49.20   10.40
   7 -15   2   54.19   13.30
 -15   8   2   43.40   13.80
  -6  14  -2   10.20    6.70
  14  -8  -2   21.60   11.40
  14  -8  -2   11.70    7.90
  -8  -6  -2   48.60   14.70
  -6  14  -2   24.30   10.30
  -8  -6  -2    2.60    8.90
   6 -14   2   25.10    8.90
   6 -14   2   23.80   10.60
 -14   8   2   19.30   10.40
  -5  13  -2    6.10    5.90
  13  -8  -2    6.20    8.90
  -8  -5  -2   15.40   13.40
  -5  13  -2   11.30    9.20
  -8  -5  -2    5.40    7.60
   8   5   2   22.90    7.20
 -13   8   2    9.90    9.20
   5 -13   2   -4.20    5.50
  -8  -4  -2   10.10    7.10
  -4  12  -2   15.80    7.90
  -4  12  -2   28.20    6.30
  -4  12  -2   24.30   17.40
  12  -8  -2   19.90    8.50
  -4  12  -2   24.30    5.90
  -8  -4  -2   29.70   12.40
 -12   8   2   20.30    4.80
   8   4   2   13.00    6.70
 -12   8   2   22.10    8.70
  -3  11  -2    2.70    5.00
  -3  11  -2    1.60   14.60
  -8  -3  -2    6.40    9.90
  -8  -3  -2   -0.90    5.40
  -3  11  -2    3.50    4.90
  11  -8  -2    5.40    7.00
  -3  11  -2   -3.00    6.40
 -11   8   2   -4.40    6.30
 -11   8   2    4.00    3.60
   8   3   2   -6.90    5.90
  -2  10  -2 1185.38   44.70
  -2  10  -2 1045.00   49.40
  -2  10  -2 1141.29   47.20
  -8  -2  -2 1108.89   51.89
  10  -8  -2 1121.89   45.40
  -8  -2  -2 1180.98   44.90
 -10   8   2 1152.98   43.20
 -10   8   2 1073.99   49.00
   2 -10   2 1137.19   48.70
   8   2   2 1116.19   47.90
  -1   9  -2   89.49   13.10
  -1   9  -2   59.19    8.30
  -8  -1  -2   84.19   13.70
   9  -8  -2   67.89   10.10
  -1   9  -2   66.79    7.70
  -8  -1  -2   94.89    8.00
  -9   8   2   67.29    5.80
  -9   8   2   64.09   10.10
   1  -9   2   85.79   10.80
   8   1   2   83.19    8.90
  -8   0  -2  226.58   11.40
   0   8  -2  215.68   12.50
   0   8  -2  231.88   11.80
  -8   0  -2  207.88   17.40
   0   8  -2  228.98   17.90
   8  -8  -2  222.38   13.70
   8   0   2  217.68   13.10
   0  -8   2  237.38   14.00
  -8   8   2  226.58   10.40
  -8   8   2  221.58   13.90
   7  -8  -2  125.69   10.00
  -8   1  -2  126.69   14.00
  -8   1  -2  116.99    7.10
   1   7  -2  101.19    8.70
   1   7  -2   96.69   13.70
  -7   8   2  104.79    9.90
   8  -1   2  116.99    9.10
   8  -1   2  115.59    8.10
  -1  -7   2  124.89   10.90
  -7   8   2  117.09    6.80
  -1  -7   2   99.89    9.30
   2   6  -2  221.28   12.10
  -8   2  -2  194.18   15.00
   6  -8  -2  223.68   12.50
  -6   8   2  233.28   10.30
   8  -2   2  206.28   11.20
  -2  -6   2  216.48   11.90
  -6   8   2  228.18   12.90
  -2  -6   2  214.58   13.40
   8  -2   2  234.48   12.20
  -8   3  -2   84.39   10.50
   3   5  -2   66.19    7.10
   5  -8  -2   60.99    7.60
   8  -3   2   76.69    7.60
   8  -3   2   66.39    6.60
  -5   8   2   76.79    5.70
  -3  -5   2   79.79    7.10
  -5   8   2   84.89    7.90
  -3  -5   2   74.09    9.10
   4   4  -2 3005.20  114.59
  -8   4  -2 2841.12  115.99
   4  -8  -2 2789.22  103.69
  -4   8   2 2917.61  114.79
   8  -4   2 2776.22  114.09
  -4  -4   2 2624.64  114.49
   8  -4   2 3029.20  103.89
  -4  -4   2 2849.42  107.79
  -4   8   2 2950.90  106.99
   3  -8  -2   66.59    7.00
   5   3  -2   75.39    8.00
  -8   5  -2   72.19    9.00
  -5  -3   2   71.59    6.00
   8  -5   2   71.39    7.80
   8  -5   2   79.39    6.90
  -3   8   2   75.89    7.60
  -3   8   2   75.29    5.80
  -5  -3   2   58.09    7.40
   6   2  -2  223.88   11.90
  -8   6  -2  225.68   14.30
   2  -8  -2  204.68   13.00
   6   2  -2  185.58   12.20
   2  -8  -2  196.98   11.30
  -2   8   2  219.98   10.70
  -6  -2   2  229.28   11.00
   8  -6   2  235.18   11.70
  -6  -2   2  215.48   14.40
   1  -8  -2  104.59    8.20
   7   1  -2  119.49    9.10
   7   1  -2  127.89    9.10
  -8   7  -2  126.89   11.20
   1  -8  -2  104.89   11.00
   8  -7   2  111.39    8.00
  -7  -1   2  108.59    7.50
  -1   8   2  112.89    8.00
  -7  -1   2  107.89   11.70
  -8   8  -2  216.48   14.50
   8   0  -2  229.38   12.60
   0  -8  -2  214.28   15.00
   8   0  -2  219.98   13.20
  -8   8  -2  240.38   19.80
   0   8   2  208.98   11.80
  -8   0   2  255.17   11.60
   0   8   2  217.48   12.60
   8  -8   2  232.78   12.10
  -8   0   2  225.28   15.50
  -1  -8  -2   69.89   12.10
  -8   9  -2   87.79   10.20
   9  -1  -2   89.89    9.40
   9  -1  -2   53.29    9.40
   1   8   2   72.49    8.60
   8  -9   2   74.49    8.00
  -9   1   2   61.69    6.80
  -9   1   2   96.69   12.70
   1   8   2   71.59    7.90
  -8  10  -2 1190.68   50.09
  -2  -8  -2 1137.09   51.79
  10  -2  -2 1131.39   48.80
  10  -2  -2 1216.98   44.80
   2   8   2 1150.28   45.90
   8 -10   2 1115.99   47.80
 -10   2   2 1145.89   51.09
 -10   2   2 1189.98   45.00
   2   8   2 1127.39   48.50
  -8  11  -2    3.90    7.00
  11  -3  -2   12.30    6.30
  11  -3  -2   -5.00    5.20
  -3  -8  -2    5.40    8.30
   3   8   2   -7.40    4.70
   8 -11   2   -3.80    4.90
 -11   3   2    5.80    8.50
   3   8   2    6.30    5.70
 -11   3   2   -2.00    4.30
   8 -11   2    5.90    6.10
  12  -4  -2   24.60    6.60
  -4  -8  -2   11.60   10.90
  -8  12  -2   19.50    8.30
  12  -4  -2   23.00    7.30
 -12   4   2   12.10    5.00
   4   8   2   17.40    6.80
   8 -12   2   15.50    6.00
   8 -12   2   18.80    8.10
 -12   4   2   17.80    9.20
   4   8   2   22.80    5.80
  13  -5  -2   11.30    7.30
  13  -5  -2   13.90    9.00
  -8  13  -2   -2.90    8.00
  -8  13  -2    5.40    5.50
  -5  -8  -2   18.10   12.80
   5   8   2    6.60    5.60
   8 -13   2   18.30    8.80
   8 -13   2    3.30    6.50
 -13   5   2    1.10    9.80
 -13   5   2    4.80    5.20
   5   8   2    3.30    7.10
  -8  14  -2   23.80    9.50
  -6  -8  -2   39.20   15.20
  -6  -8  -2   20.40   10.10
  14  -6  -2   25.10   10.50
  14  -6  -2   27.30    8.80
   8 -14   2   13.80   11.30
   6   8   2   19.90    8.40
 -14   6   2   14.50   11.00
   8 -14   2   12.60    8.50
  15  -7  -2   83.19   13.90
  -7  -8  -2   42.40   17.50
  -7  -8  -2   76.79   12.40
  -8  15  -2   55.39   13.10
  15  -7  -2   51.79   10.90
   7   8   2   45.30   10.20
 -15   7   2   51.39   14.10
   8 -15   2   64.09   13.90
   8 -15   2   53.79   10.70
  -9  -6  -2   42.20   10.60
  -9  -6  -2   39.30   18.10
  15  -9  -2   58.09   12.70
  -6  15  -2   36.40   13.10
 -15   9   2   24.70   12.60
   6 -15   2   38.60   11.20
   6 -15   2   31.40   12.90
   9   6   2   19.60   10.00
  -5  14  -2   10.20   10.10
  14  -9  -2   11.60   10.70
  -9  -5  -2    2.30   15.00
  -9  -5  -2   18.10    8.70
   5 -14   2   42.30   10.70
   5 -14   2    3.80    6.90
 -14   9   2   13.60   11.30
   9   5   2   25.50    9.00
  13  -9  -2   48.50   10.70
  -4  13  -2   62.19    7.90
  -9  -4  -2   65.19    8.80
  -9  -4  -2   43.50   14.40
 -13   9   2   61.19   10.90
   9   4   2   53.79    8.60
   4 -13   2   62.49   11.70
  12  -9  -2   57.19    9.70
  -9  -3  -2   55.79   13.50
  -3  12  -2   84.09   19.30
  -9  -3  -2   69.49   10.60
  -3  12  -2   67.19    9.90
  -3  12  -2   72.89   10.90
 -12   9   2   57.39    9.90
   9   3   2   44.90    8.50
   3 -12   2   66.09   11.00
  -9  -2  -2   20.20   11.00
  -2  11  -2    3.10    5.60
  -2  11  -2    8.40    5.40
  -9  -2  -2   11.10    5.80
  -2  11  -2   28.30   15.90
  11  -9  -2    1.10    7.00
   9   2   2   10.70    6.10
 -11   9   2    7.70    6.80
   2 -11   2    1.20    8.00
 -11   9   2    4.80    3.70
  -9  -1  -2   90.79    9.10
  -1  10  -2   60.89    9.60
  -9  -1  -2   88.29   12.50
  -1  10  -2   86.89    9.10
  10  -9  -2   73.59    9.60
  -1  10  -2   93.79   15.80
   1 -10   2   97.69   12.70
 -10   9   2   75.19    6.70
   9   1   2   78.59   10.40
 -10   9   2   75.79   11.70
   0   9  -2   29.00    5.50
   0   9  -2   35.00   11.50
   9  -9  -2   22.20    7.00
  -9   0  -2   23.00    9.60
  -9   0  -2   43.10    6.70
  -9   9   2   35.40    5.30
   9   0   2   26.10    5.60
  -9   9   2   32.00    7.50
   0  -9   2   29.10    6.90
   1   8  -2   81.29   10.80
  -9   1  -2   80.69    6.80
   1   8  -2   52.59    8.60
  -9   1  -2   96.39   14.10
   8  -9  -2   81.39   10.40
   9  -1   2   60.59    9.00
  -8   9   2   62.09    8.40
  -8   9   2   76.29    6.30
  -1  -8   2   95.29   11.50
   9  -1   2   59.29    8.00
  -1  -8   2   67.59    9.20
  -9   2  -2  106.89    7.10
   7  -9  -2  126.49   10.30
  -9   2  -2  112.69   13.70
   2   7  -2  110.19    9.40
   9  -2   2   95.19    8.80
  -2  -7   2  106.99    9.50
  -7   9   2  106.19    7.30
   9  -2   2  109.49    9.60
  -7   9   2  113.19   10.40
  -2  -7   2  112.59   11.80
  -9   3  -2    6.40    6.50
   6  -9  -2    4.70    5.10
   3   6  -2    6.40    4.40
  -3  -6   2    3.30    4.00
  -6   9   2    7.80    3.10
  -6   9   2   -0.20    4.80
   9  -3   2    3.00    4.20
  -3  -6   2    4.20    5.90
   9  -3   2   -2.40    3.60
   4   5  -2   -1.30    3.90
  -9   4  -2    9.50    6.10
   5  -9  -2   -4.00    4.40
   9  -4   2    0.30    3.40
  -4  -5   2    3.30    3.90
   9  -4   2    0.30    4.20
  -5   9   2    2.10    4.20
  -5   9   2    5.50    3.00
  -4  -5   2   -1.90    5.40
   4  -9  -2   -4.70    4.00
   5   4  -2    2.90    4.20
  -9   5  -2   -1.90    5.50
   9  -5   2    0.00    3.50
   9  -5   2    2.50    4.70
  -4   9   2    1.00    2.90
  -4   9   2   -2.90    4.50
  -5  -4   2    2.10    3.50
  -5  -4   2   -0.80    5.50
   6   3  -2    7.20    4.20
  -9   6  -2   -3.40    6.10
   3  -9  -2   -2.20    4.60
   9  -6   2    8.20    3.80
  -3   9   2    4.00    4.70
   9  -6   2    9.20    4.90
  -3   9   2    3.60    3.50
  -6  -3   2    5.30    3.60
  -6  -3   2    7.70    5.80
   2  -9  -2   87.49    9.20
   7   2  -2  110.09   10.40
  -9   7  -2  120.99   11.70
   2  -9  -2  109.99   11.50
   7   2  -2   89.19    9.50
   9  -7   2  111.39    8.90
  -7  -2   2  117.29    8.60
  -7  -2   2  112.69   12.90
   9  -7   2  107.29    9.90
  -2   9   2  115.99    8.10
   8   1  -2   87.09    9.00
  -9   8  -2   62.79   10.60
   1  -9  -2   80.69   11.20
   1  -9  -2   56.19    8.40
   8   1  -2   66.69    9.60
  -8  -1   2   84.29    7.40
   9  -8   2   86.69    8.40
  -8  -1   2   91.69   13.00
  -1   9   2   66.69    7.60
   9  -8   2   84.79    9.90
  -1   9   2   80.19    8.00
   0  -9  -2   33.00    7.60
  -9   9  -2   35.50    7.40
   9   0  -2   22.90    6.10
   9   0  -2   27.60    5.90
  -9   0   2   27.20    5.00
   0   9   2   35.90    5.40
   9  -9   2   22.10    4.80
   9  -9   2   30.50    6.70
   0   9   2   32.40    5.40
  -9   0   2   29.60    8.30
  -9  10  -2   91.79   11.80
  10  -1  -2   64.49   11.00
  -1  -9  -2   70.19   11.20
  10  -1  -2   85.49   11.30
 -10   1   2  112.79   14.70
   9 -10   2   95.09   11.60
 -10   1   2   84.79    8.10
   1   9   2   82.99    9.80
   1   9   2   73.19    9.20
   9 -10   2   71.69    8.90
  -9  11  -2   12.00    7.30
  -2  -9  -2    1.00    8.80
  11  -2  -2   -5.30    6.10
  11  -2  -2    6.60    6.90
   2   9   2   10.00    5.10
 -11   2   2   12.10    4.60
   9 -11   2   14.00    7.50
   9 -11   2   14.10    5.10
   2   9   2   23.30    6.20
 -11   2   2   -3.80    8.90
  -3  -9  -2   65.29   12.30
  12  -3  -2   68.59    9.50
  -9  12  -2   64.99   10.40
  12  -3  -2   41.50    8.70
   9 -12   2   72.39    9.90
   9 -12   2   75.89   10.30
   3   9   2   58.59    7.50
   3   9   2   64.69    8.20
 -12   3   2   56.39   11.80
 -12   3   2   68.49    8.90
  13  -4  -2   43.60    9.30
  13  -4  -2   71.39   10.40
  -9  13  -2   72.49   10.80
  -4  -9  -2   62.59   14.60
   9 -13   2   64.89   11.20
   4   9   2   61.59    9.40
 -13   4   2   67.69   10.00
   9 -13   2   93.29   11.40
   4   9   2   62.49   10.00
 -13   4   2   68.79   13.00
  -5  -9  -2   16.30   15.10
  14  -5  -2   31.10   10.40
  -9  14  -2   -4.80   10.00
  14  -5  -2    7.50    9.10
   5   9   2   12.30    6.50
   5   9   2   -1.10    8.10
   9 -14   2   15.00    7.80
   9 -14   2    6.70   10.70
 -14   5   2   21.30    6.20
 -14   5   2   18.20   12.00
  -9  15  -2   41.80   12.00
  15  -6  -2   39.50   12.30
  -6  -9  -2   47.70   12.00
  -6  -9  -2   86.49   18.00
   9 -15   2   12.10   10.40
 -15   6   2   36.10   14.20
   9 -15   2   21.50   12.80
 -10  -5  -2   -1.40    9.70
 -10  -5  -2   -7.00   18.20
  15 -10  -2   -2.50   11.90
   5 -15   2   -7.30   12.40
 -15  10   2   10.10   11.40
   5 -15   2   -0.20    7.90
   5 -15   2   24.60   13.70
   5 -15   2    5.40   11.10
 -10  -4  -2  815.72   35.50
 -10  -4  -2  861.41   45.70
  14 -10  -2  853.61   38.70
   4 -14   2  801.32   41.10
  10   4   2  779.12   37.90
 -14  10   2  728.73   39.60
   4 -14   2  775.72   36.80
  -3  13  -2   24.20    7.20
 -10  -3  -2   23.90    7.60
  13 -10  -2   35.20   10.30
 -10  -3  -2   47.40   14.10
 -13  10   2   35.40   10.00
  10   3   2   16.80    8.90
   3 -13   2   25.70   11.40
  12 -10  -2   37.30   10.00
  -2  12  -2   27.10    7.00
 -10  -2  -2   30.80   12.60
 -10  -2  -2   37.60    7.30
  -2  12  -2   43.10   18.20
 -12  10   2   39.50    9.20
  10   2   2   31.50    8.20
   2 -12   2   33.30   10.10
  -1  11  -2    0.40   14.70
 -10  -1  -2   -2.30    5.40
  -1  11  -2    5.00    5.70
  11 -10  -2   -3.10    7.10
 -10  -1  -2   -8.70   11.50
 -11  10   2   -6.00    3.90
   1 -11   2    2.10    8.00
  10   1   2   10.00    5.90
 -11  10   2    8.40    7.10
   0  10  -2   26.10    6.10
  10 -10  -2   29.00    7.60
   0  10  -2   36.10   14.30
 -10   0  -2   28.20   11.00
 -10   0  -2   28.80    5.20
 -10  10   2   29.50    4.60
   0 -10   2   31.80    7.90
   0 -10   2   32.40    9.00
  10   0   2   27.80    6.10
 -10  10   2   18.30    7.50
 -10   1  -2   94.69    8.50
 -10   1  -2  102.49   16.60
   1   9  -2   72.69   13.50
   1   9  -2   82.89   10.40
   9 -10  -2   67.09    9.80
  -9  10   2   65.19   11.10
  10  -1   2   81.09   10.60
  10  -1   2   79.49    9.30
  -1  -9   2   91.49   13.80
  -1  -9   2   74.99   10.50
   8 -10  -2 1192.18   46.60
 -10   2  -2 1135.89   52.89
 -10   2  -2 1188.08   44.50
   2   8  -2 1179.68   48.70
  -8  10   2 1224.18   44.70
  10  -2   2 1136.49   44.20
  -8  10   2 1107.89   49.70
  10  -2   2 1156.88   49.30
  -2  -8   2 1136.69   46.80
  -2  -8   2 1110.19   50.39
 -10   3  -2  211.48   17.90
   7 -10  -2  211.18   13.90
   3   7  -2  219.78   13.00
  -3  -7   2  193.98   15.90
  10  -3   2  196.18   13.30
  -3  -7   2  188.38   12.60
  10  -3   2  185.08   12.50
  -7  10   2  186.78   14.10
  -7  10   2  209.48   10.60
   4   6  -2   69.89    8.50
 -10   4  -2   56.39   10.00
   6 -10  -2   65.99    9.60
  -4  -6   2   45.40    8.30
  -6  10   2   52.59    7.30
  10  -4   2   40.90    5.80
  -4  -6   2   46.30    6.30
  10  -4   2   37.80    6.50
  -6  10   2   48.80    6.30
 -10   5  -2   12.10    7.00
   5 -10  -2   18.30    5.90
   5   5  -2   10.80    5.10
  10  -5   2   17.80    4.80
  10  -5   2   15.00    5.30
  -5  10   2   23.90    4.20
  -5  10   2   17.80    6.10
  -5  -5   2   16.10    4.90
  -5  -5   2   17.10    6.70
   6   4  -2   51.19    8.70
   4 -10  -2   39.00    6.80
 -10   6  -2   31.60    8.20
  -6  -4   2   45.30    6.90
  -6  -4   2   44.00    8.30
  10  -6   2   40.40    6.80
  10  -6   2   56.79    8.00
  -4  10   2   57.79    9.60
  -4  10   2   41.60    6.80
   3 -10  -2  157.18   12.40
 -10   7  -2  181.48   15.30
   7   3  -2  195.48   12.70
  -3  10   2  204.38   11.00
  10  -7   2  186.18   11.80
  -7  -3   2  161.38   15.50
  -7  -3   2  190.88   11.30
  10  -7   2  188.98   13.70
  -3  10   2  181.98   13.70
   2 -10  -2 1181.28   43.90
   8   2  -2 1138.69   48.10
   2 -10  -2 1067.09   49.99
 -10   8  -2 1105.79   49.90
  -2  10   2 1132.19   44.80
  10  -8   2 1182.48   45.50
  -8  -2   2 1033.50   49.90
  10  -8   2 1150.08   47.40
  -8  -2   2 1168.28   44.80
   1 -10  -2   70.59   10.10
   9   1  -2  106.79   10.60
   9   1  -2   88.69   12.00
 -10   9  -2   87.79   12.20
   1 -10  -2   87.59   10.40
  10  -9   2   77.79   12.00
  -1  10   2   95.79    9.50
  10  -9   2   78.19    9.30
  -9  -1   2   89.39   15.20
  -1  10   2   85.59    9.30
  -9  -1   2   94.79    8.50
  10   0  -2   17.00    7.20
  10   0  -2   30.00    6.80
   0 -10  -2   22.20    9.30
 -10  10  -2   22.70    7.50
  10 -10   2   30.60    8.10
  10 -10   2   21.10    5.60
   0  10   2   35.40    5.80
 -10   0   2   25.50    9.20
   0  10   2   23.90    5.70
 -10   0   2   31.40    5.30
  11  -1  -2    4.70    6.20
  -1 -10  -2   -1.10    9.20
  11  -1  -2   -1.70    7.50
 -10  11  -2    1.70    7.40
 -11   1   2   10.80    9.80
 -11   1   2    5.10    5.30
   1  10   2    6.20    5.70
  10 -11   2    9.10    7.80
  10 -11   2    8.50    5.40
   1  10   2    6.40    5.50
  -2 -10  -2   32.50   12.30
 -10  12  -2   25.00    9.90
  12  -2  -2   24.90    8.50
  12  -2  -2   44.80    9.20
  10 -12   2   35.80    6.50
  10 -12   2   36.40    9.20
   2  10   2   23.20    6.60
   2  10   2   39.30    7.20
 -12   2   2   32.60    6.10
 -12   2   2   42.60   11.50
  13  -3  -2   25.10    9.80
  -3 -10  -2   23.20   13.00
  13  -3  -2    4.10    8.70
 -10  13  -2   33.60   10.30
  10 -13   2   25.60    7.20
 -13   3   2   15.30   12.40
   3  10   2   22.30    7.90
   3  10   2   29.70    6.90
  10 -13   2   15.50   10.20
 -13   3   2   28.30    6.50
 -10  14  -2  838.42   39.40
  14  -4  -2  828.12   36.80
  14  -4  -2  774.12   38.20
  -4 -10  -2  788.82   44.80
 -14   4   2  789.42   33.50
   4  10   2  823.22   35.20
   4  10   2  726.63   36.90
 -14   4   2  751.42   41.40
  10 -14   2  800.02   36.20
  10 -14   2  847.02   38.50
  -5 -10  -2   13.10   11.90
  15  -5  -2   -1.60   11.80
  -5 -10  -2   -9.90   16.20
 -10  15  -2  -10.90   11.70
  10 -15   2    3.00   11.30
   5  10   2   16.90    9.00
 -15   5   2   -1.80   13.10
  15 -11  -2   35.90   12.80
 -11  -4  -2    6.40   18.80
 -11  -4  -2   15.70   10.20
   4 -15   2   11.60   13.20
  11   4   2   20.20   10.00
   4 -15   2   37.20   15.30
   4 -15   2   30.80   12.10
 -15  11   2   18.70   12.90
  -3  14  -2   31.90    8.90
 -11  -3  -2    8.80    9.20
 -11  -3  -2    3.80   16.90
  14 -11  -2   21.00   11.80
   3 -14   2   24.40   13.80
   3 -14   2   42.10   11.50
   3 -14   2   20.00   10.80
 -14  11   2   35.50   11.80
  11   3   2   31.40    9.40
  -2  13  -2   -1.30    7.10
 -11  -2  -2   10.20    7.80
  13 -11  -2   17.90   10.30
 -11  -2  -2    8.10   14.30
   2 -13   2   10.00    9.10
   2 -13   2    1.80   11.60
 -13  11   2    8.30    9.30
  12 -11  -2  131.89   16.30
 -11  -1  -2  137.89   12.40
  -1  12  -2  118.19   12.90
 -11  -1  -2  144.79   23.40
   1 -12   2  126.99   18.10
  11   1   2  116.59   14.50
   1 -12   2  110.69   15.40
 -12  11   2   96.89   14.90
  11 -11  -2   -3.70    8.10
 -11   0  -2   21.40   11.70
   0  11  -2   -6.30    6.10
 -11   0  -2    7.60    6.00
 -11  11   2    7.80    4.90
  11   0   2    6.10    6.60
   0 -11   2    4.20    7.50
 -11  11   2   -1.90    7.80
   0 -11   2   -2.80   10.10
 -11   1  -2    5.90   10.50
   1  10  -2   13.10    6.60
 -11   1  -2    0.50    5.10
  10 -11  -2   -5.50    7.00
  -1 -10   2    8.80    6.90
  11  -1   2   15.50    6.30
  -1 -10   2    7.80    9.40
 -10  11   2   17.40    4.80
 -10  11   2    4.30    7.20
 -11   2  -2   17.70    4.40
   9 -11  -2   -3.00    7.30
   2   9  -2    7.00    6.50
 -11   2  -2    8.50    9.80
  11  -2   2    6.90    6.10
  -9  11   2    8.00    4.20
  11  -2   2   17.10    6.30
  -2  -9   2    9.40    6.50
  -2  -9   2    5.50    8.60
  -9  11   2   16.30    7.00
   8 -11  -2   13.90    7.00
   3   8  -2    1.90    5.70
 -11   3  -2   11.90    8.20
  -3  -8   2   -0.80    9.00
  -8  11   2   -0.50    6.70
  -8  11   2    2.50    3.90
  11  -3   2   -5.50    5.80
  11  -3   2    0.40    5.30
  -3  -8   2   -1.80    5.50
   4   7  -2    7.40    5.80
   7 -11  -2   15.50    6.50
 -11   4  -2    5.50    8.50
  11  -4   2   14.80    6.10
  -7  11   2   10.20    3.80
  -4  -7   2   10.40    5.60
  -7  11   2    3.90    6.00
  11  -4   2    2.50    5.20
  -4  -7   2   11.70    8.30
 -11   5  -2   26.00    8.90
   6 -11  -2   19.70    6.90
   5   6  -2   23.10    5.80
  11  -5   2   19.00    5.60
  -5  -6   2   20.00    5.60
  -6  11   2   30.00    6.90
  11  -5   2   22.70    6.50
  -6  11   2   21.70    4.70
  -5  -6   2   34.90    9.00
   5 -11  -2   22.90    6.50
   6   5  -2   23.10    6.20
 -11   6  -2   11.10    7.80
  -5  11   2   28.00    4.80
  -5  11   2   13.50    6.80
  11  -6   2   19.70    6.70
  -6  -5   2   23.90    5.30
  11  -6   2   19.20    5.50
  -6  -5   2   22.10    8.30
   4 -11  -2    7.10    5.90
 -11   7  -2    7.80    8.30
   7   4  -2    8.00    5.80
  -4  11   2   10.00    4.50
  -7  -4   2    2.40    8.20
  11  -7   2   16.00    6.50
  11  -7   2    6.60    5.10
  -4  11   2   14.30    7.40
  -7  -4   2    1.70    4.90
   3 -11  -2   14.80    7.90
   8   3  -2    3.70    5.70
   3 -11  -2   -7.80    6.30
 -11   8  -2    1.50    7.20
  -8  -3   2   -8.30    9.20
  -3  11   2    5.90    5.00
  11  -8   2    8.90    5.10
  -8  -3   2    6.50    4.90
  11  -8   2    3.80    6.30
   9   2  -2  -10.20    6.30
   2 -11  -2   13.50    6.70
 -11   9  -2    0.70    7.70
   2 -11  -2   11.90    8.50
  -9  -2   2   13.50    9.40
  -2  11   2    5.60    4.90
  11  -9   2    4.80    5.60
  11  -9   2    4.70    7.10
  -9  -2   2    2.90    4.80
  -2  11   2    4.30    5.20
 -11  10  -2    8.30    7.80
   1 -11  -2   17.00    9.10
  10   1  -2    7.40    6.30
  11 -10   2    6.60    5.50
  11 -10   2   -2.00    7.50
  -1  11   2    3.90    5.60
  -1  11   2   10.30    5.80
 -10  -1   2    6.20   10.40
 -10  -1   2    0.10    5.20
  11   0  -2   20.10    6.70
  11   0  -2    6.60    9.00
 -11  11  -2   10.80    8.00
   0 -11  -2   -2.40    9.80
   0  11   2    2.40    6.30
  11 -11   2    9.60    8.00
  11 -11   2    7.00    6.40
 -11   0   2   21.40   10.50
   0  11   2   12.80    6.10
 -11   0   2    6.00    5.60
  -1 -11  -2  108.59   15.50
  12  -1  -2  168.78   16.30
 -11  12  -2  111.89   14.90
  12  -1  -2  131.19   14.20
  11 -12   2  136.69   16.50
  11 -12   2  103.89   12.80
   1  11   2  120.69   12.90
   1  11   2   90.89   12.00
 -12   1   2  113.99   15.20
 -12   1   2  120.49   11.50
 -11  13  -2  -10.30    9.00
  13  -2  -2    4.30    8.20
  -2 -11  -2   19.30   13.20
  13  -2  -2    8.90   10.70
  11 -13   2    0.40    7.20
 -13   2   2    4.90   12.30
 -13   2   2   20.60    7.20
   2  11   2   13.20    8.00
  11 -13   2   20.90   10.20
   2  11   2   10.10    6.30
  14  -3  -2   26.90    9.70
  -3 -11  -2   32.80   16.10
 -11  14  -2   50.49   11.20
  14  -3  -2   19.20   11.20
   3  11   2   22.80    8.90
  11 -14   2   36.30   11.90
 -14   3   2   12.90   13.70
 -14   3   2   27.20    7.50
   3  11   2   26.50    7.20
  15  -4  -2   50.19   13.40
 -11  15  -2   45.70   12.60
  -4 -11  -2   12.90   17.70
  15  -4  -2   28.40   10.50
  11 -15   2   33.70   12.60
   4  11   2   23.50    8.30
   4  11   2   24.10    9.60
 -15   4   2   15.70   14.90
  14 -12  -2   93.59   14.20
 -12  -2  -2   99.99   18.50
 -12  -2  -2  114.09   15.10
  -2  14  -2   67.59   10.20
   2 -14   2   90.19   12.90
   2 -14   2   89.69   15.70
 -14  12   2   78.99   14.10
 -12  -1  -2   31.60   15.80
 -12  -1  -2   28.80    8.40
  13 -12  -2   50.39   12.20
  -1  13  -2   20.00    8.20
  12   1   2   19.50    9.90
   1 -13   2   22.70   13.50
 -13  12   2   12.00   10.60
   1 -13   2   42.00   11.00
   0  12  -2  583.84   31.80
  12 -12  -2  726.63   33.70
 -12   0  -2  678.23   29.10
 -12   0  -2  661.03   39.20
   0 -12   2  652.73   36.50
   0 -12   2  708.23   32.30
 -12  12   2  637.34   34.40
  12   0   2  692.73   32.90
  11 -12  -2  106.59   13.00
 -12   1  -2  123.49   11.50
 -12   1  -2  114.19   16.20
   1  11  -2  118.49   13.40
  -1 -11   2  113.89   14.80
  -1 -11   2  111.99   14.70
 -11  12   2  146.89   15.50
 -11  12   2  110.39    9.80
  12  -1   2  114.49   14.00
  10 -12  -2   17.90    9.30
 -12   2  -2   40.90    5.60
   2  10  -2   37.10    7.90
 -12   2  -2   23.80   12.30
 -10  12   2   29.80    8.50
  12  -2   2   30.60    8.00
  -2 -10   2   34.60   10.80
  -2 -10   2   32.70    7.80
 -10  12   2   23.30    5.30
  12  -2   2   25.50    7.30
   9 -12  -2   58.09   11.30
 -12   3  -2   73.89   13.20
   3   9  -2   68.19   11.50
  -9  12   2   77.99    8.50
  -9  12   2   51.59    9.70
  -3  -9   2   72.59   12.00
  12  -3   2   84.09   12.30
  -3  -9   2   59.29    8.70
  12  -3   2   56.29    8.50
   4   8  -2   22.50    6.80
   8 -12  -2   17.60    8.40
 -12   4  -2   18.90   10.40
  -4  -8   2   12.70    6.40
  -4  -8   2   22.40   10.20
  12  -4   2   18.20    7.40
  -8  12   2    8.30    8.00
  12  -4   2   19.60    6.60
  -8  12   2   26.10    5.50
 -12   5  -2   84.29   12.40
   7 -12  -2  128.19   14.10
   5   7  -2  123.49   12.50
  -5  -7   2  105.49   16.80
  12  -5   2  107.29   13.10
  12  -5   2  101.19   12.60
  -5  -7   2  113.09   11.40
  -7  12   2  105.19    9.50
  -7  12   2  105.29   13.00
   6   6  -2  540.05   26.60
   6 -12  -2  586.34   26.70
 -12   6  -2  541.25   31.00
  -6  -6   2  553.64   30.20
  -6  12   2  560.74   24.20
  -6  12   2  550.84   28.80
  12  -6   2  576.54   26.20
  12  -6   2  561.84   26.90
  -6  -6   2  555.64   25.50
 -12   7  -2  105.69   15.60
   5 -12  -2  131.29   14.00
   7   5  -2  116.99   11.90
  -7  -5   2   71.69   12.20
  -5  12   2  112.79   10.10
  12  -7   2   97.19   11.60
  -5  12   2   95.29   14.30
  12  -7   2  125.39   13.50
  -7  -5   2   87.89   10.30
   4 -12  -2   15.20    7.90
   8   4  -2   21.20    6.60
 -12   8  -2   14.10    8.70
   4 -12  -2   24.60    9.20
  12  -8   2    6.10    6.10
  -8  -4   2   20.10    6.30
  -4  12   2   21.70    5.70
  12  -8   2   30.20    7.90
  -8  -4   2   20.40   10.90
 -12   9  -2   52.69   10.10
   9   3  -2   71.99   11.90
   3 -12  -2   56.79    9.20
   3 -12  -2   70.79   11.70
  -9  -3   2   73.09   12.60
  -9  -3   2   61.99   10.00
  -3  12   2   65.39   10.10
  12  -9   2   70.59   10.10
  12  -9   2   91.59   11.00
  10   2  -2    7.90    7.60
   2 -12  -2   23.20   10.20
   2 -12  -2   34.90    8.50
 -12  10  -2   53.29   10.50
  12 -10   2   31.50    6.90
 -10  -2   2   30.30   11.80
 -10  -2   2   58.69    9.30
  -2  12   2   34.10    7.10
  -2  12   2   24.60    6.70
  12 -10   2   54.59    9.90
  11   1  -2   95.89   14.40
   1 -12  -2  143.79   19.40
 -12  11  -2  135.49   15.60
  12 -11   2  112.59   13.50
  -1  12   2  112.79   12.60
  12 -11   2  142.79   15.80
  -1  12   2  104.39   12.00
 -11  -1   2  138.29   20.20
 -11  -1   2  127.59   11.80
  12   0  -2  656.73   32.30
 -12  12  -2  682.83   34.70
   0 -12  -2  628.94   37.60
 -12   0   2  665.73   36.80
 -12   0   2  690.73   29.00
   0  12   2  657.43   30.20
   0  12   2  608.04   30.80
  12 -12   2  639.84   31.20
  12 -12   2  717.03   32.60
  13  -1  -2   49.30    9.50
  -1 -12  -2   13.40   13.30
 -12  13  -2   17.60   11.00
  12 -13   2   37.50   11.00
 -13   1   2   30.40    7.60
  12 -13   2   30.50    8.20
   1  12   2   27.00    7.70
 -13   1   2   27.80   13.80
   1  12   2    7.80    9.40
  14  -2  -2   95.09   15.70
  -2 -12  -2   96.59   18.10
 -12  14  -2   78.79   13.60
  12 -14   2   97.89   14.70
 -14   2   2   84.99   17.10
 -14   2   2   74.09    9.90
   2  12   2   80.99   10.50
 -13  -1  -2    7.20    9.20
  14 -13  -2   18.50   13.30
 -13  -1  -2   29.00   17.60
  -1  14  -2   -1.10    9.00
   1 -14   2   18.30   11.70
   1 -14   2   11.10   16.10
 -14  13   2   -5.40   11.70
  13   1   2   -5.60   11.00
 -13   0  -2   22.70    8.40
 -13   0  -2   30.50   16.10
   0  13  -2   17.90    8.70
  13 -13  -2   25.80   12.70
  13   0   2   20.20   10.20
   0 -13   2   14.10   15.00
 -13  13   2   34.30   10.80
   0 -13   2   23.70   10.90
 -13   1  -2   29.60   15.00
  12 -13  -2   16.60   10.90
 -13   1  -2   35.90    8.10
   1  12  -2   26.90    9.20
  -1 -12   2   20.50    9.80
 -12  13   2   24.40   11.10
  -1 -12   2    9.70   13.70
  13  -1   2   39.10    9.30
 -13   2  -2   -0.30   12.40
   2  11  -2   20.90    8.90
  11 -13  -2    4.20    9.60
 -11  13   2   10.50    8.80
  -2 -11   2    0.20   11.60
  -2 -11   2   13.70    8.90
  13  -2   2    8.70    7.50
   3  10  -2   22.40    8.30
  10 -13  -2   25.00   10.10
 -13   3  -2   57.49   13.60
 -10  13   2   12.00    9.70
 -10  13   2   28.20    5.90
  13  -3   2   26.80    8.80
  13  -3   2   20.30    8.40
  -3 -10   2   19.20   12.50
  -3 -10   2   30.00    8.70
   9 -13  -2   52.59   11.80
   4   9  -2   70.69    9.60
 -13   4  -2   63.99   13.00
  -4  -9   2   56.99   12.70
  -9  13   2   70.79    9.70
  13  -4   2   69.29    9.80
  -9  13   2   62.19   10.70
  -4  -9   2   55.09    9.10
  13  -4   2   57.79    9.50
   8 -13  -2  -13.10    8.90
   5   8  -2   13.90    7.30
 -13   5  -2    6.70   10.80
  -8  13   2   15.10    5.80
  -8  13   2   11.90    8.30
  -5  -8   2   11.10    7.30
  13  -5   2    7.30    6.60
  -5  -8   2   15.40   11.30
  13  -5   2    7.20    8.60
   7 -13  -2   -6.00    8.60
 -13   6  -2  -10.80   10.10
   6   7  -2   16.60    7.10
  -6  -7   2   39.80   11.60
  13  -6   2    7.90    7.20
  -7  13   2    4.90    5.40
  -7  13   2    2.60    8.30
  -6  -7   2    9.10    6.30
 -13   7  -2   -3.50    9.60
   6 -13  -2  -17.40    8.30
   7   6  -2    1.40    6.90
  13  -7   2   -0.90    7.20
  -7  -6   2   -2.50   11.20
  -6  13   2    7.50    8.60
  13  -7   2    9.40    8.40
  -6  13   2    1.70    5.90
  -7  -6   2   -3.40    6.20
 -13   8  -2    0.10    9.40
   5 -13  -2   -1.70    8.90
   8   5  -2   13.60    7.20
  -5  13   2   11.60    8.50
  13  -8   2   13.40    8.70
  -5  13   2    8.20    6.20
  13  -8   2    1.60    7.00
  -8  -5   2   20.70   11.30
  -8  -5   2   12.90    6.30
 -13   9  -2   75.79   12.10
   4 -13  -2   58.09   10.40
   4 -13  -2   65.29   12.90
   9   4  -2   75.89   12.90
  -9  -4   2   37.50   13.00
  13  -9   2   74.09   12.60
  -4  13   2   72.99   11.00
  -9  -4   2   60.69    8.60
  13  -9   2   63.69   10.60
   3 -13  -2    7.30    9.10
  10   3  -2   30.10    8.30
 -13  10  -2   18.70   10.50
   3 -13  -2   37.00   11.30
  13 -10   2   33.20    9.80
  -3  13   2   22.80    6.90
 -10  -3   2   27.00   12.30
 -10  -3   2   18.60    6.80
  13 -10   2   29.40    7.70
  11   2  -2   -4.00    8.10
   2 -13  -2   41.20   11.80
 -13  11  -2   -9.00    9.90
  -2  13   2   -8.10    7.10
  13 -11   2   13.60   10.00
  -2  13   2    7.60    6.90
 -11  -2   2   11.70    7.40
 -11  -2   2    7.80   13.00
  13 -11   2   22.90    7.40
 -13  12  -2   32.30   10.70
   1 -13  -2   39.70   14.30
  12   1  -2    0.60    9.20
  -1  13   2   26.60    8.30
  13 -12   2   27.80   10.40
  13 -12   2   21.10    8.30
 -12  -1   2   45.10   13.90
  -1  13   2   18.70    8.10
 -12  -1   2   38.10    8.00
 -13  13  -2   19.40   10.90
   0 -13  -2   -2.40   14.60
  13   0  -2   -8.60    9.40
 -13   0   2   27.10   14.80
 -13   0   2   25.30    8.60
  13 -13   2   27.90   11.00
   0  13   2   17.00    8.70
  13 -13   2   10.90    8.80
   0  13   2    9.20    7.80
  -1 -13  -2   -1.80   17.00
 -13  14  -2    1.70   11.80
  14  -1  -2    5.80   10.30
   1  13   2    4.90   11.20
  13 -14   2   16.00   11.90
 -14   1   2   11.20    8.80
 -14   1   2   18.20   15.20
   1  13   2   26.60    8.40
   1  13  -2    7.40    9.70
  13 -14  -2   16.60   14.10
 -14   1  -2   31.80   17.00
  -1 -13   2   18.00   11.10
  -1 -13   2   18.30   17.80
  14  -1   2   11.10   10.50
 -13  14   2   13.10   11.90
  12 -14  -2   92.59   15.30
   2  12  -2   67.49   11.20
 -12  14   2   83.79   13.60
  -2 -12   2  106.09   17.10
  -2 -12   2   64.29   16.70
  14  -2   2  101.39   16.30
 -14   3  -2   32.70   15.60
   3  11  -2   13.90    9.30
  11 -14  -2    1.30   11.40
  -3 -11   2   44.10   15.10
  -3 -11   2   27.70   10.00
 -11  14   2   17.00   11.40
  14  -3   2   23.80    8.80
 -14   4  -2  765.72   43.80
   4  10  -2  764.22   37.70
  10 -14  -2  821.12   39.00
 -10  14   2  862.41   40.10
  -4 -10   2  802.52   43.30
 -10  14   2  806.52   33.70
  14  -4   2  824.12   38.80
  14  -4   2  836.42   36.00
  -4 -10   2  795.12   36.80
   9 -14  -2    9.30   10.80
 -14   5  -2    3.40   12.30
   5   9  -2   15.40    8.20
  14  -5   2   15.80    9.80
  -5  -9   2   20.60    8.90
  -9  14   2   21.80    9.90
  14  -5   2   11.70    8.40
  -5  -9   2    9.40   13.40
  -9  14   2   28.50    7.00
 -14   6  -2    7.50   12.70
   6   8  -2   18.80    8.50
   8 -14  -2   -8.40    9.70
  -6  -8   2   22.80    8.20
  -8  14   2    0.80    9.80
  -8  14   2   26.10    7.00
  14  -6   2   15.00   10.10
  14  -6   2   14.00    8.00
   7 -14  -2  -11.40   10.10
   7   7  -2   16.60    7.90
 -14   7  -2    6.40   11.80
  -7  -7   2    4.50    7.80
  14  -7   2    8.90    8.40
  -7  14   2   10.40    6.80
  -7  -7   2    7.60   13.60
  14  -7   2    3.00    9.90
  -7  14   2    2.10    9.60
   6 -14  -2   12.70   10.30
   8   6  -2   12.50    8.10
 -14   8  -2   16.90   11.20
  -8  -6   2   19.10    7.70
  14  -8   2   24.20   10.40
  -6  14   2   17.90    7.00
  -8  -6   2   11.90   13.40
  14  -8   2   15.60    7.80
  -6  14   2   18.70   11.20
   5 -14  -2   41.20   11.80
   9   5  -2    9.60    8.50
   5 -14  -2    0.10   10.00
 -14   9  -2   23.40   11.90
  -5  14   2   29.20    7.50
  14  -9   2   38.80   11.00
  -9  -5   2   -0.20   14.20
  14  -9   2   17.70    8.80
  -9  -5   2   29.20    8.50
   4 -14  -2  771.72   36.10
   4 -14  -2  760.62   41.60
 -14  10  -2  692.63   40.10
  10   4  -2  757.02   37.10
  -4  14   2  802.72   34.60
  14 -10   2  871.11   37.40
 -10  -4   2  754.62   42.10
  14 -10   2  833.62   37.20
 -10  -4   2  801.22   34.70
  11   3  -2   32.20    9.40
 -14  11  -2   13.20   10.80
   3 -14  -2    9.70   13.00
 -11  -3   2   34.50    8.30
  14 -11   2   25.60   11.30
  -3  14   2   24.00    8.30
 -11  -3   2   33.20   15.30
  14 -11   2   20.40    8.80
   2 -14  -2   83.19   16.50
  12   2  -2   74.39   11.30
 -14  12  -2   78.29   13.70
  -2  14   2   67.99   10.50
  14 -12   2   70.59   13.80
  14 -12   2  108.09   16.10
 -12  -2   2   72.79   16.70
 -12  -2   2   93.69   13.20
  13   1  -2   18.20    9.90
   1 -14  -2   12.60   17.00
 -14  13  -2    9.10   11.80
  14 -13   2    9.70   11.50
 -13  -1   2   48.20   16.70
  -1  14   2   -4.80    8.20
  -1  14   2    4.40    9.10
 -13  -1   2   14.40    8.90
   4  11  -2   26.60   10.40
  11 -15  -2   10.30   13.50
 -15   4  -2   25.00   17.00
  -4 -11   2   33.50   10.50
 -11  15   2   36.10   11.70
  15  -4   2   24.40    9.90
 -15   5  -2   -1.90   14.10
   5  10  -2   15.40    9.40
  10 -15  -2  -15.80   12.40
  15  -5   2  -14.20   10.90
  15  -5   2   14.30    9.60
  -5 -10   2    7.90    9.90
 -10  15   2    0.20   10.80
   9 -15  -2   33.00   13.10
 -15   6  -2   23.20   15.30
   6   9  -2   35.40    9.50
  -6  -9   2   69.79   17.20
  15  -6   2   37.80   11.80
  -9  15   2   42.20    8.60
  -9  15   2   25.30   11.80
  15  -6   2   32.90   10.20
  -6  -9   2   44.90    9.50
   7   8  -2   52.49   10.30
   8 -15  -2   63.99   13.50
 -15   7  -2   41.50   14.90
  -8  15   2   58.39    8.80
  15  -7   2   46.60   10.60
  -8  15   2   70.19   13.90
  -7  -8   2   89.79   17.00
  -7  -8   2   52.09   10.40
  15  -7   2   56.59   13.30
 -15   8  -2   67.29   14.60
   8   7  -2   89.39   14.60
   7 -15  -2   62.29   13.40
  15  -8   2   49.20   10.60
  -7  15   2   54.39   13.70
  15  -8   2   58.19   13.40
  -8  -7   2   48.50   16.20
  -8  -7   2   53.19   10.20
   6 -15  -2   70.69   14.70
   6 -15  -2   32.80   12.70
 -15   9  -2   41.10   13.60
   9   6  -2   34.10    9.30
  15  -9   2   39.30   10.10
  -9  -6   2   49.50    9.80
  -9  -6   2   16.50   16.30
  15  -9   2   11.80   12.60
  -6  15   2   47.60    9.40
  10   5  -2   -5.40    8.80
   5 -15  -2   -9.50   13.80
 -15  10  -2   -6.60   12.70
   5 -15  -2   -9.70   11.60
  -5  15   2    1.60    8.40
  15 -10   2    4.70   12.40
 -10  -5   2  -13.10    8.60
  15 -10   2   -0.70    9.50
 -10  -5   2   27.50   16.10
   4 -15  -2   21.50   15.20
 -15  11  -2   42.30   12.70
  11   4  -2   17.20    9.90
 -11  -4   2   19.20   16.60
 -11  -4   2   42.70    9.10
  15 -11   2   23.70   10.50
  -4  15   2   22.70    9.10
  15 -11   2   51.49   13.10
   0   0  -3    0.40    0.90
   0   0  -3    2.40    1.30
   0   0  -3    0.60    1.70
   0   0   3   -0.30    0.80
   0   0   3    0.10    2.00
   0   0   3   -0.30    1.20
   0   0   3    0.40    0.80
   0   1  -3  205.78    8.20
  -1   0  -3  206.98    8.70
  -1   0  -3  179.08    8.00
   0   1  -3  183.78    8.80
   0   1  -3  160.38    7.40
   1  -1  -3  178.48    8.00
  -1   0  -3  177.58    7.30
   1  -1  -3  180.28    8.10
   1   0   3  185.18    7.30
   1   0   3  190.58    8.10
   1   0   3  165.68    8.10
  -1   1   3  161.18    7.90
   1   0   3  181.28    8.80
   0  -1   3  186.18    7.50
  -1   1   3  189.98    7.60
  -1   1   3  198.38    8.30
   1   0  -3  189.58    8.50
  -1   1  -3  170.78    7.90
   0  -1  -3  162.38    7.40
   0  -1  -3  196.08    8.70
  -1   1  -3  180.78    8.60
   1   0  -3  195.88    7.70
   1   0  -3  198.28    8.00
   0  -1  -3  181.68    7.80
  -1   1  -3  176.98    7.40
  -1   1  -3  207.68    9.30
   0  -1  -3  186.28    8.10
  -1   0   3  183.98    7.60
   0   1   3  185.58    7.50
   1  -1   3  194.48    8.10
   1  -1   3  176.68    8.80
   0   1   3  187.98    8.60
   1  -1   3  175.48    8.60
   0   1   3  193.38    7.90
   1  -1   3  195.68    7.40
   0   1   3  154.58    7.70
   2  -1  -3   -0.10    1.70
  -1   2  -3   -3.00    1.00
  -1   2  -3   -0.50    3.10
  -1   2  -3   -2.20    1.50
  -1  -1  -3   -1.00    0.90
  -1  -1  -3    0.90    1.90
   2  -1  -3   -0.30    1.50
  -1  -1  -3   -1.90    1.70
  -1  -1  -3    0.70    1.20
  -2   1   3   -1.50    1.30
   1   1   3    0.50    0.90
   1  -2   3   -3.10    1.70
   1   1   3    2.50    1.90
   1   1   3    1.20    1.10
   1  -2   3   -0.90    0.90
   1  -2   3   -1.10    0.90
  -2   1   3   -0.50    0.90
  -2  -1  -3  425.96   15.90
   3  -2  -3  407.56   16.20
  -2  -1  -3  409.26   18.40
  -1   3  -3  360.36   15.80
  -1   3  -3  392.26   17.50
  -1   3  -3  423.76   17.00
  -3   2   3  419.16   15.80
   1  -3   3  349.87   16.70
   2   1   3  414.36   15.70
   2   1   3  369.06   16.80
   1  -3   3  397.96   15.70
  -3   2   3  439.26   17.10
  -2   0  -3  408.36   18.00
  -2   0  -3  434.76   16.40
   0   2  -3  412.96   16.90
  -2   0  -3  369.76   15.40
   2  -2  -3  415.06   16.00
   2  -2  -3  417.36   17.00
   0   2  -3  419.16   17.00
  -2   2   3  420.26   17.00
   0  -2   3  383.76   15.70
   2   0   3  373.86   15.90
   2   0   3  404.86   16.90
  -2   2   3  389.36   15.70
   2   0   3  398.16   15.40
   1  -2  -3   -2.80    1.50
   1   1  -3    2.40    2.40
  -2   1  -3    0.30    2.20
  -2   1  -3   -3.60    2.80
   1   1  -3   -1.30    1.40
  -1   2   3    1.40    1.50
  -1   2   3   -2.50    1.90
   2  -1   3    0.20    1.10
  -1  -1   3   -2.80    1.00
  -1   2   3    0.90    1.00
   2  -1   3    6.00    3.00
   2  -1   3   -2.50    2.10
   2  -1   3   -0.70    0.70
  -2   2  -3  418.86   17.00
   0  -2  -3  420.46   17.30
   0  -2  -3  365.36   15.00
   2   0  -3  409.96   15.70
   2   0  -3  394.56   16.20
  -2   2  -3  412.06   17.10
   2  -2   3  387.66   17.20
  -2   0   3  356.36   16.30
   0   2   3  399.56   15.30
   2  -2   3  422.96   16.50
  -2   0   3  386.36   15.40
   0   2   3  348.87   15.00
   3  -1  -3  399.96   15.60
  -2   3  -3  399.36   16.70
   3  -1  -3  387.96   16.00
  -1  -2  -3  364.36   14.80
   3  -1  -3  362.06   16.50
  -2   3  -3  394.06   17.30
  -2   3  -3  368.56   15.00
  -1  -2  -3  415.26   17.70
   2  -3   3  339.87   16.90
   2  -3   3  398.76   16.30
  -3   1   3  397.76   15.30
   1   2   3  384.76   15.20
  -3   1   3  384.96   16.20
   1   2   3  371.96   16.20
   2  -3   3  402.36   14.90
  -3   1   3  428.16   16.40
  -2   4  -3   -3.60    1.90
  -2  -2  -3   -0.50    2.70
  -2   4  -3   -2.30    3.90
   4  -2  -3    0.70    2.00
   2  -4   3    3.60    1.50
   2   2   3   -2.70    1.50
   2  -4   3    0.30    1.40
   2   2   3   -1.10    1.30
  -4   2   3   -2.40    2.00
  -4   2   3   -1.00    1.20
  -2   5  -3  112.19    6.60
  -2   5  -3  111.19    6.40
   5  -3  -3  114.59    7.10
  -2   5  -3  114.79   10.20
  -3  -2  -3  116.69    8.70
   3   2   3  102.19    5.60
  -5   3   3  101.69    7.00
   2  -5   3  107.29    5.90
   3   2   3  103.99    6.60
  -5   3   3  106.39    5.60
  -1   4  -3   85.39    8.60
  -1   4  -3   97.99    5.70
  -3  -1  -3   96.49    7.50
   4  -3  -3   90.99    6.10
  -4   3   3   97.49    5.90
  -4   3   3   85.99    4.70
   3   1   3   90.09    4.70
   3   1   3   89.89    5.40
   1  -4   3   84.39    4.90
  -3   0  -3   49.10    5.50
  -3   0  -3   54.19    5.90
   3  -3  -3   50.99    4.40
   0   3  -3   54.39    4.20
   0   3  -3   51.79    5.70
  -3   0  -3   50.09    3.20
   3   0   3   48.50    3.80
  -3   3   3   42.70    3.00
   3   0   3   49.80    5.90
  -3   3   3   49.90    4.10
   3   0   3   46.60    3.00
   0  -3   3   45.20    3.40
  -3   1  -3  436.26   18.60
  -3   1  -3  400.66   17.10
   2  -3  -3  388.76   16.00
   1   2  -3  399.96   16.90
   1   2  -3  415.16   17.10
  -2   3   3  396.76   15.90
  -2   3   3  417.16   17.40
  -1  -2   3  396.76   16.10
   3  -1   3  393.96   17.10
  -3   2  -3  422.16   17.50
   2   1  -3  402.76   16.10
  -3   2  -3  396.16   17.80
   1  -3  -3  380.96   15.50
   2   1  -3  395.66   16.60
  -1   3   3  380.46   15.50
  -1   3   3  409.56   17.20
  -2  -1   3  378.36   15.70
   3  -2   3  395.96   16.70
   3   0  -3   46.60    4.30
   3   0  -3   49.40    3.90
   0  -3  -3   42.70    3.60
  -3   3  -3   49.40    4.80
  -3   3  -3   58.79    7.30
   0  -3  -3   47.30    4.80
   3   0  -3   38.20    4.50
   0   3   3   37.20    3.80
  -3   0   3   49.30    3.40
   0   3   3   46.20    3.20
   3  -3   3   55.09    3.80
  -3   0   3   50.59    4.00
  -1  -3  -3   90.69    7.10
  -3   4  -3  100.49    9.30
   4  -1  -3   93.89    6.00
   4  -1  -3   97.19    5.60
  -3   4  -3   97.49    6.30
  -4   1   3   86.79    6.00
   3  -4   3  102.49    5.50
   1   3   3   88.89    5.50
  -4   1   3   85.69    4.80
   1   3   3   89.79    5.00
   5  -2  -3  102.19    6.70
  -2  -3  -3  110.49    8.50
  -3   5  -3  102.39    9.80
  -3   5  -3   95.39    6.70
   5  -2  -3  102.29    6.00
   3  -5   3   89.19    5.00
   3  -5   3  119.09    5.80
   3  -5   3  100.39    5.40
   2   3   3   98.29    5.60
   2   3   3  108.29    6.50
  -3   6  -3    1.00    2.60
   6  -3  -3    2.10    2.80
  -3  -3  -3   -1.40    3.50
  -3   6  -3   -6.60    5.50
  -6   3   3    0.30    1.70
  -6   3   3    1.10    3.20
   3  -6   3   -3.00    2.40
   3   3   3   -1.20    2.30
   3   3   3    0.50    1.80
  -4  -3  -3   58.79    8.90
   7  -4  -3   60.99    6.90
  -3   7  -3   53.69    6.10
  -3   7  -3   72.29   10.10
  -7   4   3   63.49    7.00
  -7   4   3   71.29    4.90
   4   3   3   62.49    4.90
   4   3   3   66.39    6.40
   3  -7   3   60.39    5.90
  -4  -2  -3  615.14   28.70
  -2   6  -3  637.94   26.50
  -2   6  -3  640.34   27.90
   6  -4  -3  627.74   25.10
  -2   6  -3  610.74   26.20
   2  -6   3  651.13   25.10
  -6   4   3  651.93   27.30
  -6   4   3  592.44   24.40
   4   2   3  623.44   24.60
   4   2   3  620.94   26.70
  -4  -1  -3   11.30    3.90
   5  -4  -3   11.90    3.10
  -1   5  -3    9.60    2.50
  -1   5  -3    0.50    5.20
  -1   5  -3    8.40    2.50
   4   1   3   11.30    2.50
   4   1   3   12.10    2.10
   1  -5   3   13.40    2.60
  -5   4   3   12.70    3.20
  -5   4   3   10.50    1.80
   0   4  -3  383.76   17.50
   0   4  -3  385.66   16.40
   4  -4  -3  364.56   15.70
  -4   0  -3  379.16   16.30
  -4   0  -3  373.76   18.30
   4   0   3  365.56   16.40
   4   0   3  366.86   14.80
  -4   4   3  390.16   16.90
  -4   4   3  384.16   15.00
   0  -4   3  357.06   15.40
  -4   1  -3   85.89    7.90
   1   3  -3  111.69    8.30
  -4   1  -3  101.19    7.60
   3  -4  -3   88.69    6.00
   1   3  -3   93.09    5.80
  -1  -3   3   88.49    5.30
  -3   4   3   89.49    4.70
   4  -1   3   92.89    5.70
  -3   4   3  102.29    6.10
  -4   2  -3   -0.40    2.80
   2  -4  -3    0.00    2.10
   2   2  -3   -0.40    2.90
   2   2  -3   -2.90    1.80
  -4   2  -3   -0.50    3.90
  -2   4   3   -1.30    1.30
  -2   4   3    0.60    2.20
   4  -2   3    0.30    1.60
  -2  -2   3   -1.80    1.60
   3   1  -3   93.89    5.70
   3   1  -3   94.39    6.40
   1  -4  -3   88.29    6.50
  -4   3  -3   97.89    6.90
  -4   3  -3   94.59    9.10
   1  -4  -3   84.49    5.40
  -3  -1   3   84.29    5.00
   4  -3   3   89.29    5.30
  -1   4   3   87.09    4.90
  -4   4  -3  376.86   18.30
   4   0  -3  378.86   16.10
   4   0  -3  370.86   15.40
  -4   4  -3  377.66   17.20
   0  -4  -3  343.47   14.40
   0  -4  -3  375.46   17.50
   0   4   3  357.66   15.10
   4  -4   3  383.26   16.10
  -4   0   3  380.76   16.40
  -4   0   3  361.06   15.10
  -4   5  -3   13.30    3.20
   5  -1  -3   16.20    2.90
   5  -1  -3    9.40    3.30
  -1  -4  -3   16.10    4.00
  -4   5  -3   19.30    5.60
   1   4   3   10.60    2.30
  -5   1   3   10.50    2.00
  -5   1   3   14.40    3.30
   1   4   3   12.00    2.40
   4  -5   3   10.30    2.40
   6  -2  -3  639.04   26.50
  -4   6  -3  653.03   27.20
  -2  -4  -3  613.34   28.60
   6  -2  -3  634.94   25.10
  -4   6  -3  624.94   28.40
  -6   2   3  674.63   27.70
   2   4   3  614.14   26.70
   4  -6   3  623.54   26.50
   2   4   3  620.94   25.00
  -6   2   3  633.74   24.80
  -4   7  -3   67.19    6.30
   7  -3  -3   59.49    6.90
   7  -3  -3   71.69    6.40
  -3  -4  -3   65.89    8.30
  -4   7  -3   51.19    9.30
   4  -7   3   63.59    5.50
  -7   3   3   59.79    4.80
   3   4   3   59.49    6.40
   3   4   3   60.09    5.10
  -7   3   3   60.79    7.30
  -4  -4  -3    0.70    5.50
   8  -4  -3    1.60    3.80
  -4   8  -3   -0.70    3.70
  -4   8  -3    2.40    8.50
   8  -4  -3    2.30    3.20
   4   4   3   -1.70    2.50
  -8   4   3    1.10    2.30
   4   4   3   -1.60    3.20
   4  -8   3    2.20    2.80
  -8   4   3   -0.80    4.30
  -4   9  -3  503.45   23.10
   9  -5  -3  499.85   22.30
  -5  -4  -3  470.65   26.60
  -4   9  -3  492.05   29.60
  -9   5   3  522.15   20.60
   5   4   3  508.15   21.30
  -9   5   3  492.65   24.90
   5   4   3  505.35   23.30
  -3   8  -3   20.50    8.60
  -5  -3  -3   26.10    6.50
   8  -5  -3   25.20    4.80
  -3   8  -3   24.40    4.50
  -3   8  -3   32.10    4.60
   5   3   3   23.70    3.50
   5   3   3   27.70    4.50
   3  -8   3   28.30    4.70
  -8   5   3   31.30    4.30
  -8   5   3   23.70    5.10
   7  -5  -3   12.70    3.50
  -2   7  -3    5.30    3.20
  -2   7  -3    8.40    7.20
  -5  -2  -3   12.70    5.10
  -2   7  -3   10.90    3.30
   5   2   3    7.20    2.90
  -7   5   3    9.20    2.20
   5   2   3   13.90    2.60
   2  -7   3    9.90    3.30
  -7   5   3    8.70    3.80
  -5  -1  -3  704.13   31.20
  -1   6  -3  676.13   28.60
  -1   6  -3  666.43   29.50
  -1   6  -3  659.73   28.30
   6  -5  -3  708.63   27.30
   1  -6   3  683.03   27.20
  -6   5   3  685.53   29.30
  -6   5   3  651.53   26.20
   5   1   3  664.23   28.90
   5   1   3  682.93   26.40
   0   5  -3  546.35   23.70
  -5   0  -3  519.25   25.00
   0   5  -3  533.45   22.60
   5  -5  -3  540.25   21.70
  -5   5   3  539.95   23.40
   5   0   3  517.15   22.90
   0  -5   3  507.05   22.50
  -5   5   3  548.55   20.90
   0  -5   3  524.65   21.60
   5   0   3  540.65   20.80
   1   4  -3    9.00    5.00
   4  -5  -3   14.80    3.10
  -5   1  -3   17.30    4.40
  -5   1  -3   16.10    5.00
   1   4  -3   13.80    3.00
  -4   5   3   10.10    1.90
  -1  -4   3   13.20    2.60
  -4   5   3   14.90    2.80
   5  -1   3   12.40    2.50
   5  -1   3   15.00    2.40
   2   3  -3   98.79    8.90
   3  -5  -3   99.59    6.60
   2   3  -3  103.29    6.50
  -5   2  -3  112.59   10.00
  -5   2  -3  122.39    8.90
  -2  -3   3  111.69    6.20
   5  -2   3  106.79    6.50
  -3   5   3  109.29    6.90
  -3   5   3  101.49    5.40
  -5   3  -3  114.09   10.30
  -5   3  -3  107.29    8.30
   2  -5  -3   97.29    6.40
   3   2  -3  105.29    7.90
   3   2  -3  106.89    6.50
  -3  -2   3  102.49    5.90
  -2   5   3   98.79    5.50
  -2   5   3  108.19    7.10
   5  -3   3  103.79    6.30
   1  -5  -3   13.50    2.70
   4   1  -3   11.50    3.30
   1  -5  -3   10.10    3.30
  -5   4  -3   14.60    5.40
   4   1  -3   13.60    2.90
  -5   4  -3   10.80    3.40
  -1   5   3   14.50    2.40
   5  -4   3   11.50    2.30
  -4  -1   3   13.70    2.30
  -4  -1   3   13.10    3.30
   5   0  -3  537.75   21.70
  -5   5  -3  543.95   24.30
   5   0  -3  580.64   23.40
   0  -5  -3  568.14   24.70
  -5   5  -3  558.84   24.90
  -5   0   3  533.75   21.60
   0   5   3  520.55   21.70
   5  -5   3  548.15   23.00
   0   5   3  510.95   22.70
  -5   0   3  535.85   23.70
  -1  -5  -3  705.13   31.10
   6  -1  -3  697.73   27.30
   6  -1  -3  689.03   29.00
  -5   6  -3  735.33   30.10
  -5   6  -3  684.13   30.90
   1   5   3  645.54   27.20
   1   5   3  701.33   29.10
  -6   1   3  679.43   27.10
  -6   1   3  707.83   30.00
   5  -6   3  678.13   28.90
  -5   7  -3   10.80    3.70
   7  -2  -3   11.20    3.50
   7  -2  -3    9.40    3.60
  -5   7  -3   14.40    7.20
  -2  -5  -3   14.20    5.00
   5  -7   3   10.80    3.10
   2   5   3   17.00    3.90
   2   5   3    9.80    2.60
  -7   2   3   13.10    4.50
  -7   2   3   11.40    2.60
   8  -3  -3   29.80    4.70
  -3  -5  -3   24.80    6.20
   8  -3  -3   25.60    4.90
  -5   8  -3   42.00    6.60
  -5   8  -3   18.30    9.30
   3   5   3   25.30    3.80
  -8   3   3   24.10    3.40
   3   5   3   30.60    5.00
   5  -8   3   35.80    6.10
  -8   3   3   28.30    6.40
   9  -4  -3  508.35   22.30
  -5   9  -3  496.55   29.30
  -4  -5  -3  478.45   26.40
   9  -4  -3  530.25   22.40
  -5   9  -3  503.05   23.00
  -9   4   3  512.35   20.40
  -9   4   3  417.96   24.00
   4   5   3  494.85   21.20
   5  -9   3  498.75   22.20
   4   5   3  488.35   23.30
  -5  -5  -3    5.60    7.80
  10  -5  -3    4.50    5.30
  -5  10  -3   -3.50    5.40
  -5  10  -3    0.70   11.50
  10  -5  -3    1.10    4.50
   5 -10   3   -5.50    3.90
 -10   5   3    3.60    6.30
   5   5   3   -5.10    3.60
 -10   5   3    0.40    3.20
  -6  -5  -3   13.20    9.80
  -5  11  -3    5.10    5.90
  -5  11  -3  -10.70   14.70
  11  -6  -3    4.70    6.10
   6   5   3   -6.20    5.90
   6   5   3    4.20    4.20
 -11   6   3    0.60    3.80
 -11   6   3   -2.40    7.30
   5 -11   3   -2.60    4.60
  -6  -4  -3  228.08   18.70
  10  -6  -3  237.48   14.80
  -4  10  -3  238.48   24.20
  -4  10  -3  193.98   13.70
 -10   6   3  242.68   16.00
 -10   6   3  235.08   11.10
   6   4   3  218.88   14.40
   6   4   3  219.88   11.80
  -3   9  -3   44.30    7.30
  -6  -3  -3   36.90    9.10
   9  -6  -3   38.90    6.10
  -3   9  -3   44.70   12.20
  -3   9  -3   35.50    5.50
   3  -9   3   44.60    5.80
  -9   6   3   36.60    4.10
   6   3   3   34.10    4.70
   6   3   3   36.00    5.40
  -9   6   3   33.60    6.70
  -2   8  -3   13.60    4.00
  -2   8  -3    9.70    9.20
   8  -6  -3    7.50    4.60
  -6  -2  -3   16.00    7.30
  -8   6   3    4.10    4.70
  -8   6   3   14.30    2.80
   2  -8   3   17.40    4.00
   6   2   3   14.00    3.00
   6   2   3   13.90    4.10
  -6  -1  -3   41.70    7.30
  -1   7  -3   49.70    6.40
  -1   7  -3   63.59    9.40
  -1   7  -3   46.60    6.20
   7  -6  -3   46.00    7.10
  -7   6   3   51.59    6.70
   6   1   3   52.29    6.40
   1  -7   3   40.00    6.10
   6   1   3   46.50    4.60
  -7   6   3   47.80    4.30
   6  -6  -3  257.97   13.10
   0   6  -3  270.37   16.40
   0   6  -3  256.17   12.60
  -6   0  -3  251.67   15.60
   6   0   3  256.67   11.00
  -6   6   3  261.87   11.10
   0  -6   3  250.27   12.90
  -6   6   3  266.97   13.50
   6   0   3  247.18   12.80
   0  -6   3  253.97   12.30
  -6   1  -3  706.53   30.80
  -6   1  -3  705.23   28.20
   1   5  -3  652.03   28.00
   1   5  -3  651.03   28.10
   5  -6  -3  691.83   26.80
   6  -1   3  616.54   28.10
  -5   6   3  633.64   28.60
  -5   6   3  703.23   25.90
  -1  -5   3  662.33   26.80
   6  -1   3  664.73   25.50
  -1  -5   3  641.74   28.10
   2   4  -3  620.24   26.70
   4  -6  -3  634.34   25.20
   2   4  -3  601.94   26.50
  -6   2  -3  638.54   29.00
  -6   2  -3  667.63   27.90
   6  -2   3  606.44   26.70
  -2  -4   3  627.14   25.30
  -4   6   3  646.64   27.40
  -4   6   3  641.44   24.60
   3  -6  -3    1.60    3.00
   3   3  -3   -1.90    2.40
   3   3  -3    2.10    4.90
  -6   3  -3    4.50    4.10
  -6   3  -3   -6.30    5.80
  -3  -3   3    0.70    2.30
  -3  -3   3   -2.80    2.70
  -3   6   3    1.20    1.90
  -3   6   3    3.90    2.70
   6  -3   3   -0.20    2.10
  -6   4  -3  658.33   28.60
   2  -6  -3  629.94   24.80
   4   2  -3  652.03   25.40
  -6   4  -3  657.83   28.70
   4   2  -3  665.83   27.20
  -2   6   3  639.04   25.10
   6  -4   3  624.94   26.80
  -2   6   3  629.94   27.70
  -4  -2   3  618.74   25.40
  -4  -2   3  599.64   27.30
   5   1  -3  718.73   27.20
   1  -6  -3  690.03   30.50
  -6   5  -3  693.13   30.40
   1  -6  -3  662.63   26.20
  -6   5  -3  707.03   30.90
   5   1  -3  702.13   29.20
   6  -5   3  694.03   28.90
  -5  -1   3  683.93   27.20
  -1   6   3  672.33   27.10
  -5  -1   3  667.23   29.60
  -6   6  -3  245.48   17.10
   6   0  -3  269.37   13.20
  -6   6  -3  278.77   14.30
   0  -6  -3  264.87   14.30
   6   0  -3  269.57   12.50
  -6   0   3  249.38   13.90
  -6   0   3  249.88   11.60
   0   6   3  241.38   11.70
   6  -6   3  253.17   12.40
   0   6   3  260.97   12.50
  -6   7  -3   55.79    7.50
   7  -1  -3   42.30    6.40
   7  -1  -3   44.80    7.00
  -1  -6  -3   58.49    8.70
  -6   7  -3   54.59    9.50
  -7   1   3   57.39    8.20
   1   6   3   55.59    6.70
   1   6   3   41.80    4.90
   6  -7   3   59.39    5.90
  -7   1   3   53.69    4.90
  -6   8  -3   13.60    4.50
  -6   8  -3   19.70   10.10
   8  -2  -3   19.90    4.80
  -2  -6  -3    9.00    5.90
   8  -2  -3   14.80    4.20
   2   6   3    7.10    4.10
   2   6   3   16.10    3.40
   6  -8   3   17.30    3.60
  -8   2   3   18.10    5.70
  -8   2   3   15.00    3.30
  -6   9  -3   31.60    6.10
  -3  -6  -3   46.90    8.10
  -6   9  -3   28.10   10.80
   9  -3  -3   42.50    6.00
   3   6   3   30.10    5.20
  -9   3   3   42.40    7.30
  -9   3   3   42.60    5.30
   3   6   3   40.70    6.40
   6  -9   3   34.60    5.40
  10  -4  -3  263.37   14.50
  -6  10  -3  227.38   24.60
  -4  -6  -3  224.88   18.70
  10  -4  -3  235.88   14.10
  -6  10  -3  246.38   14.90
   4   6   3  223.68   12.60
 -10   4   3  226.68   16.40
   6 -10   3  232.68   13.50
   4   6   3  227.68   13.90
 -10   4   3  224.18   11.70
  -5  -6  -3    0.00    8.70
  11  -5  -3    1.10    6.20
  -6  11  -3   11.80   14.00
  -6  11  -3    2.70    6.40
  11  -5  -3   -3.50    5.30
   6 -11   3   -3.40    5.50
   5   6   3    1.60    5.20
 -11   5   3    7.60    7.80
 -11   5   3   -6.00    3.60
  12  -6  -3   -0.10    6.10
  -6  12  -3  -17.20   15.70
  -6  12  -3    1.40    7.30
  12  -6  -3    2.20    7.60
  -6  -6  -3   14.00   10.90
 -12   6   3   -5.30    4.00
 -12   6   3   -6.90    9.00
   6   6   3    5.20    6.00
   6 -12   3    4.80    6.40
   6   6   3    7.70    4.80
  -6  13  -3  280.37   19.90
  -6  13  -3  257.37   34.00
  -7  -6  -3  249.08   25.90
  13  -7  -3  283.77   19.90
 -13   7   3  277.67   14.00
   6 -13   3  245.28   17.50
   7   6   3  278.57   15.50
   7   6   3  288.97   18.40
   6 -13   3  299.67   17.70
 -13   7   3  265.87   21.30
  -5  12  -3   43.10    9.00
  -5  12  -3   79.69   19.30
  12  -7  -3   56.39    9.60
  -7  -5  -3   51.59   13.00
 -12   7   3   78.19    7.30
   7   5   3   58.19    7.30
 -12   7   3   61.09   10.40
   5 -12   3   57.59    8.40
   7   5   3   76.19   11.80
  11  -7  -3   28.70    7.60
  -4  11  -3   20.90   16.10
  -4  11  -3   16.40    7.20
  -7  -4  -3   29.90   10.20
   4 -11   3   31.70    7.00
   7   4   3   15.00    6.80
 -11   7   3   25.00    8.10
 -11   7   3   24.50    4.10
   7   4   3   23.60    5.00
  10  -7  -3  208.88   14.40
  -3  10  -3  202.88   13.40
  -3  10  -3  190.78   12.60
  -7  -3  -3  252.47   19.10
  -3  10  -3  217.88   24.70
   7   3   3  210.78   13.50
   7   3   3  203.38   11.10
 -10   7   3  207.48   10.30
 -10   7   3  207.58   15.00
   3 -10   3  192.08   13.00
  -2   9  -3   92.69    9.60
  -2   9  -3  120.89   18.20
  -2   9  -3  101.09    9.00
  -7  -2  -3  123.99   14.60
   9  -7  -3  109.99   10.70
   2  -9   3   93.59    9.50
  -9   7   3  114.99   10.80
  -9   7   3   96.89    6.90
   7   2   3  114.99    9.80
   7   2   3  109.59    7.40
  -1   8  -3   90.69    8.20
   8  -7  -3   89.99    9.50
  -1   8  -3  107.69   15.60
  -7  -1  -3   97.99   13.70
   7   1   3   82.39    8.90
   7   1   3   84.69    6.00
   1  -8   3   67.29    8.90
  -8   7   3   80.39    9.30
   1  -8   3   89.59    8.50
  -8   7   3   87.09    6.10
   0   7  -3   89.79   11.10
  -7   0  -3   69.49   11.40
   7  -7  -3   72.09    8.60
   0   7  -3   73.79    7.30
   7   0   3   62.19    7.70
   0  -7   3   76.59    8.20
  -7   7   3   66.69    5.10
   0  -7   3   79.19    7.30
  -7   1  -3   42.80    5.00
  -7   1  -3   54.59    8.10
   1   6  -3   50.19    6.40
   1   6  -3   48.70    8.70
   6  -7  -3   45.80    7.10
  -6   7   3   45.40    6.40
  -1  -6   3   52.49    7.40
  -6   7   3   51.29    4.50
  -1  -6   3   59.19    6.00
   7  -1   3   47.50    6.40
   7  -1   3   46.60    5.70
  -7   2  -3    5.90    7.00
  -7   2  -3    7.50    5.10
   2   5  -3   12.80    3.40
   2   5  -3    6.70    6.50
   5  -7  -3   14.90    4.00
   7  -2   3    8.60    2.90
  -2  -5   3   10.90    3.20
  -5   7   3   12.50    2.60
  -2  -5   3   12.20    3.90
  -5   7   3   12.60    3.80
   3   4  -3   69.89   10.00
   4  -7  -3   57.79    6.70
  -7   3  -3   58.59    8.30
  -7   3  -3   62.19    9.30
   3   4  -3   65.09    6.50
  -4   7   3   66.09    5.00
  -3  -4   3   57.79    5.40
   7  -3   3   62.09    5.80
  -4   7   3   45.90    6.20
  -3  -4   3   48.60    6.80
   4   3  -3   65.99    6.70
  -7   4  -3   65.19    8.50
  -7   4  -3   70.49   10.30
   4   3  -3   58.39    8.70
   3  -7  -3   57.99    6.50
  -3   7   3   62.99    6.90
  -4  -3   3   46.90    7.00
  -3   7   3   67.09    5.20
   7  -4   3   60.89    5.80
  -4  -3   3   62.89    5.40
  -7   5  -3    8.80    4.30
   2  -7  -3    8.30    3.30
   5   2  -3   11.50    3.60
  -7   5  -3   17.80    7.70
   5   2  -3    8.70    4.40
  -2   7   3   13.80    3.90
   7  -5   3   13.10    2.90
  -5  -2   3   10.70    2.70
  -2   7   3   10.30    2.80
  -5  -2   3   15.30    4.90
   6   1  -3   51.19    6.70
   1  -7  -3   53.89    8.00
   1  -7  -3   48.50    5.80
  -7   6  -3   58.59    9.80
  -7   6  -3   44.80    6.30
   6   1  -3   65.99    7.90
  -1   7   3   41.30    4.90
  -6  -1   3   40.30    5.10
  -6  -1   3   48.80    6.60
   7  -6   3   48.30    5.70
  -7   7  -3   76.69    8.60
   7   0  -3   64.09    7.90
   7   0  -3   84.19    8.10
   0  -7  -3   65.79    9.00
  -7   7  -3   89.19   12.60
   7  -7   3   64.79    6.60
  -7   0   3   60.89    9.50
   0   7   3   75.49    7.30
   0   7   3   69.29    6.20
  -7   0   3   75.49    5.80
  -1  -7  -3   79.49   11.50
   8  -1  -3   80.79    8.50
   8  -1  -3   92.59    8.70
  -7   8  -3   80.09   13.40
  -7   8  -3   94.59    9.60
   1   7   3   85.59    7.50
  -8   1   3   96.49    6.80
  -8   1   3   88.69   10.00
   1   7   3   93.39    8.30
   7  -8   3   87.09    7.60
   9  -2  -3  100.89   10.20
  -7   9  -3   87.29   15.70
   9  -2  -3  129.89   10.40
  -7   9  -3  123.69   11.30
  -2  -7  -3  103.09   13.10
   7  -9   3  124.99    9.30
   2   7   3  114.99    8.70
   2   7   3  120.69   10.30
  -9   2   3  132.19    8.00
  -9   2   3  123.39   12.20
  -3  -7  -3  207.88   17.50
  10  -3  -3  229.18   13.80
  -7  10  -3  189.98   14.10
  -7  10  -3  199.18   23.80
  10  -3  -3  184.08   13.10
   3   7   3  178.88   13.20
 -10   3   3  198.68   10.70
   7 -10   3  190.18   12.20
 -10   3   3  200.68   16.30
   3   7   3  203.78   12.00
  11  -4  -3   15.00    6.30
  -7  11  -3   15.40   13.20
  11  -4  -3   31.20    7.00
  -4  -7  -3   24.20   10.10
  -7  11  -3   26.80    7.30
   4   7   3   20.90    5.30
   7 -11   3   27.90    6.00
   4   7   3   14.80    6.40
 -11   4   3   28.90    8.80
 -11   4   3   25.80    5.10
  -5  -7  -3   50.59   12.40
  -7  12  -3   55.19   17.80
  12  -5  -3   34.50    7.70
  -7  12  -3   66.89    9.90
  12  -5  -3   51.09    8.20
 -12   5   3   48.50    7.80
   5   7   3   49.99    6.80
   5   7   3   40.60    8.40
   7 -12   3   76.99   11.00
 -12   5   3   49.60   10.20
  13  -6  -3  308.27   19.70
  -7  13  -3  272.47   33.20
  -7  13  -3  287.27   19.00
  13  -6  -3  230.78   18.20
  -6  -7  -3  325.17   25.40
   6   7   3  228.38   18.50
 -13   6   3  242.98   21.30
   6   7   3  266.27   15.30
   7 -13   3  301.27   16.90
   7 -13   3  265.97   17.60
 -13   6   3  262.37   14.10
  -7  14  -3    3.00    9.30
  -7  -7  -3  -12.10   14.60
  -7  -7  -3   -7.60   10.10
  14  -7  -3   -4.80    9.50
   7 -14   3   -0.40    8.80
   7 -14   3   -0.90    8.30
 -14   7   3   -8.60   10.70
  -8  -7  -3   44.50   17.60
  15  -8  -3   14.90   12.30
  -8  -7  -3   14.10   10.70
  -7  15  -3   -9.50   11.40
   7 -15   3   28.10   12.40
   7 -15   3   17.30   10.30
 -15   8   3    6.90   12.10
   8   7   3    9.20    9.40
  14  -8  -3   51.89   11.70
  -6  14  -3   34.30   10.50
  -8  -6  -3   80.29   16.80
  -8  -6  -3   56.79   10.60
   6 -14   3   54.29    9.80
   8   6   3   29.60    9.20
   6 -14   3   40.70    9.30
 -14   8   3   34.70   11.90
  -8  -5  -3   68.99   14.90
  -8  -5  -3   26.00    8.70
  13  -8  -3   41.50   10.00
  -5  13  -3   41.00    9.80
  -5  13  -3   24.20   20.10
   8   5   3   32.40    7.90
 -13   8   3   22.60    9.90
   5 -13   3   34.50    8.60
 -13   8   3   34.10    5.90
  12  -8  -3  227.18   17.10
  -4  12  -3  210.98   16.60
  -8  -4  -3  207.78   23.40
  -8  -4  -3  215.88   15.20
  -4  12  -3  236.88   30.30
 -12   8   3  202.88   17.00
 -12   8   3  211.58   11.80
   4 -12   3  227.78   15.60
   8   4   3  192.48   16.80
  -3  11  -3  181.58   13.10
  -3  11  -3  180.08   26.80
  11  -8  -3  183.98   15.00
  -8  -3  -3  181.68   20.80
  -3  11  -3  140.49   14.00
  -8  -3  -3  181.68   13.00
 -11   8   3  186.78   10.50
   3 -11   3  185.88   13.50
 -11   8   3  192.28   15.40
   8   3   3  181.78   14.00
  -8  -2  -3    4.70    5.00
  10  -8  -3   -3.60    5.60
  -2  10  -3   18.40   13.80
  -2  10  -3   -6.20    4.70
  -8  -2  -3    4.60    9.00
 -10   8   3    5.40    3.40
   2 -10   3    6.00    5.90
   2 -10   3  -11.60    6.40
   8   2   3    2.90    5.00
 -10   8   3    0.00    6.00
  -8  -1  -3  211.38   18.70
  -1   9  -3  199.78   12.50
   9  -8  -3  212.28   13.90
  -8  -1  -3  207.48   11.80
  -1   9  -3  224.88   20.20
   1  -9   3  213.58   14.00
  -9   8   3  200.28   10.10
  -9   8   3  204.38   14.20
   1  -9   3  198.78   13.00
   8   1   3  203.38   13.30
   0   8  -3  535.15   25.40
  -8   0  -3  593.44   23.70
   0   8  -3  571.04   29.00
  -8   0  -3  583.04   29.80
   8  -8  -3  565.24   25.50
   0  -8   3  558.14   24.90
  -8   8   3  606.74   23.10
   8   0   3  577.84   26.20
   0  -8   3  557.44   26.00
  -8   8   3  560.94   27.10
   1   7  -3   89.29   11.20
  -8   1  -3   75.39    6.50
  -8   1  -3   76.99   10.90
   7  -8  -3   92.99    9.70
   1   7  -3   80.89    8.50
  -1  -7   3  104.99    9.60
  -7   8   3   88.59    6.10
  -1  -7   3   81.39    8.30
  -7   8   3   99.39    9.40
   8  -1   3   76.49    8.40
   8  -1   3   78.09    7.50
   2   6  -3   17.20    8.00
  -8   2  -3   16.70    6.90
   6  -8  -3    7.20    4.50
   2   6  -3   16.70    4.10
   8  -2   3   18.60    4.30
   8  -2   3   15.30    4.20
  -2  -6   3   11.90    5.10
  -6   8   3   12.30    4.90
  -6   8   3   12.30    3.00
  -2  -6   3   13.60    4.00
   3   5  -3   28.70    7.80
  -8   3  -3   23.90    7.20
   5  -8  -3   27.20    5.40
   3   5  -3   30.00    4.70
  -3  -5   3   27.90    4.30
  -3  -5   3   27.30    5.40
   8  -3   3   28.40    5.00
  -5   8   3   30.20    5.30
  -5   8   3   30.70    4.70
   8  -3   3   31.30    4.40
   4  -8  -3   -0.10    4.00
  -8   4  -3   -8.30    8.00
  -8   4  -3    4.90    5.30
   4   4  -3    6.30    6.40
   4   4  -3    1.20    3.90
  -4   8   3    4.00    2.70
  -4   8   3   -3.50    4.10
   8  -4   3    0.40    2.90
  -4  -4   3   -6.00    4.20
  -4  -4   3   -6.20    2.80
  -8   5  -3   39.80    9.40
  -8   5  -3   28.00    6.50
   5   3  -3   31.70    6.10
   5   3  -3   31.60    4.80
   3  -8  -3   21.50    4.80
  -3   8   3   28.90    5.60
   8  -5   3   28.30    4.30
  -5  -3   3   39.90    5.60
  -3   8   3   27.50    3.60
  -5  -3   3   19.00    5.70
   2  -8  -3   14.70    5.40
  -8   6  -3    7.30    5.70
   6   2  -3   17.60    4.50
   6   2  -3   13.00    5.50
   2  -8  -3    6.00    4.50
  -8   6  -3   14.70    8.60
   8  -6   3   16.20    3.40
  -2   8   3   16.70    3.60
  -6  -2   3   14.30    5.60
  -6  -2   3   11.80    3.50
   7   1  -3   77.99    8.60
  -8   7  -3   79.79   10.90
   7   1  -3  112.79    9.80
   1  -8  -3   84.79   10.70
   1  -8  -3   76.79    7.70
  -8   7  -3   56.59   11.50
  -1   8   3   84.89    7.10
   8  -7   3   86.89    7.50
  -7  -1   3   81.09   10.90
  -1   8   3   72.99    7.20
  -7  -1   3   93.09    7.00
  -8   8  -3  551.54   30.60
   8   0  -3  578.94   25.90
   0  -8  -3  570.94   27.80
   8   0  -3  611.34   24.20
  -8   8  -3  560.64   27.50
   8  -8   3  564.84   25.20
  -8   0   3  564.44   27.30
   0   8   3  527.45   23.80
   0   8   3  565.04   25.00
  -8   0   3  586.74   23.70
  -8   9  -3  172.48   20.30
   9  -1  -3  219.28   13.10
  -8   9  -3  192.38   14.30
   9  -1  -3  224.48   12.90
  -1  -8  -3  188.08   16.70
   1   8   3  193.58   11.70
   8  -9   3  201.68   12.00
   1   8   3  218.18   13.00
  -9   1   3  210.28   11.20
  -9   1   3  225.98   15.60
  -2  -8  -3   -5.60    7.30
  10  -2  -3    6.90    5.30
  -8  10  -3    2.10    6.30
  -8  10  -3   -1.40   11.90
  10  -2  -3    2.40    6.10
   2   8   3    4.10    5.10
   2   8   3    6.30    4.50
 -10   2   3    3.20    7.90
 -10   2   3    5.70    4.00
   8 -10   3    7.70    4.40
  11  -3  -3  166.48   13.40
  -8  11  -3  154.28   14.70
  11  -3  -3  182.08   14.10
  -3  -8  -3  173.98   18.40
  -8  11  -3  165.08   24.30
   3   8   3  161.38   13.20
 -11   3   3  185.08   10.70
   8 -11   3  162.88   12.40
 -11   3   3  176.58   16.70
   3   8   3  175.78   11.60
  -4  -8  -3  204.38   22.50
  -8  12  -3  239.98   16.80
  -8  12  -3  220.48   27.50
  12  -4  -3  244.58   16.70
  12  -4  -3  183.98   15.70
   4   8   3  200.68   14.90
 -12   4   3  196.98   19.20
   8 -12   3  199.58   14.30
   4   8   3  186.28   13.50
 -12   4   3  216.38   12.50
  -8  13  -3   42.50    9.90
  13  -5  -3   20.90    8.50
  -5  -8  -3   22.80   12.90
  13  -5  -3   49.99   10.20
   8 -13   3   28.20    7.70
 -13   5   3   38.20    6.10
   5   8   3   37.90    8.20
 -13   5   3   31.40   11.10
   5   8   3   39.90    6.70
  14  -6  -3   30.10    9.70
  -8  14  -3   45.00   10.30
  -6  -8  -3   76.99   15.60
  14  -6  -3   61.29   11.40
   6   8   3   39.50    9.10
   8 -14   3   34.90    9.10
   6   8   3   31.80    7.60
 -14   6   3   43.00   12.70
 -14   6   3   30.00    6.80
   8 -14   3   46.20   12.50
  -8  15  -3   24.50   11.30
  -7  -8  -3   15.80   11.30
  15  -7  -3   32.80   12.30
  15  -7  -3   -9.70   10.10
  -7  -8  -3  -10.50   18.20
   7   8   3   19.40    9.30
   8 -15   3    9.50   11.30
   8 -15   3    8.30    9.80
  -9  -6  -3    5.40   10.60
  15  -9  -3   -2.50   12.10
  -6  15  -3   -1.90   12.00
  -9  -6  -3   30.40   18.30
   6 -15   3   20.50   12.90
 -15   9   3   16.20   11.30
   6 -15   3    0.60   10.30
   6 -15   3   13.40   10.40
  -9  -5  -3   21.30    9.60
  14  -9  -3   37.10   12.10
  -5  14  -3   20.20   10.60
  -9  -5  -3   59.39   18.00
   9   5   3   30.90    8.90
   5 -14   3   42.00    9.70
 -14   9   3   60.29   12.50
  -9  -4  -3   95.59   13.30
  -4  13  -3   72.79   23.00
  -9  -4  -3   84.79   16.60
  13  -9  -3   79.49   11.90
   4 -13   3  107.59   14.30
   9   4   3   71.69   10.40
 -13   9   3  100.99   15.70
  -9  -3  -3   -4.70    6.40
  -9  -3  -3  -14.90   10.70
  12  -9  -3   -5.40    8.40
  -3  12  -3    3.90   18.30
  -3  12  -3    5.90    6.10
 -12   9   3    1.70    4.30
 -12   9   3    3.20    8.70
   3 -12   3    8.30    7.10
   3 -12   3   16.20    9.10
   9   3   3   -4.70    6.60
  -2  11  -3   37.30   16.30
  -9  -2  -3    4.60   10.40
  -2  11  -3    1.30    5.40
  11  -9  -3    7.00    7.90
  -9  -2  -3    2.70    5.70
 -11   9   3   -0.40    3.90
 -11   9   3    6.10    7.10
   9   2   3    2.40    5.80
   2 -11   3   -4.70    7.80
   2 -11   3    7.00    6.60
  10  -9  -3   40.20    8.00
  -9  -1  -3   49.00    6.70
  -9  -1  -3   49.99   11.20
  -1  10  -3   50.09    6.80
  -1  10  -3   58.19   15.40
   1 -10   3   44.90    7.20
   9   1   3   58.19   10.00
   1 -10   3   47.40    9.10
 -10   9   3   61.09    8.90
 -10   9   3   49.00    6.60
   0   9  -3   41.10   11.40
  -9   0  -3   49.70    5.70
   9  -9  -3   41.60    8.00
  -9   0  -3   49.80   11.50
   0   9  -3   43.00    6.40
   9   0   3   37.20    6.30
  -9   9   3   38.20    7.90
  -9   9   3   45.70    6.10
   0  -9   3   49.99    7.30
   0  -9   3   34.00    7.20
  -9   1  -3  207.28   10.70
   1   8  -3  212.58   18.40
   8  -9  -3  212.88   14.10
   1   8  -3  195.98   12.70
  -9   1  -3  204.78   18.20
  -8   9   3  216.38   10.40
   9  -1   3  186.88   11.60
  -1  -8   3  197.18   14.50
   9  -1   3  196.78   13.10
  -1  -8   3  191.78   12.70
  -8   9   3  221.98   14.00
   2   7  -3  111.89    9.60
   7  -9  -3  123.89   10.80
   2   7  -3   93.59   11.70
  -9   2  -3  104.59   14.40
  -7   9   3  114.79   10.80
  -2  -7   3  109.19    9.20
  -7   9   3  120.69    7.50
   9  -2   3  110.29    9.70
   9  -2   3  109.09    9.20
  -2  -7   3  108.49   11.60
   3   6  -3   29.70    9.40
  -9   3  -3   27.80    7.70
   3   6  -3   38.30    5.30
   6  -9  -3   38.90    6.40
   9  -3   3   45.90    7.20
  -6   9   3   37.10    5.70
   9  -3   3   54.79    8.20
  -3  -6   3   39.30    5.60
  -6   9   3   34.90    6.30
  -3  -6   3   45.00    7.00
   4   5  -3  474.75   24.10
   4   5  -3  475.95   22.60
   5  -9  -3  484.55   22.00
  -9   4  -3  498.65   26.20
  -5   9   3  524.05   20.60
  -4  -5   3  486.35   23.70
  -4  -5   3  490.25   21.40
   9  -4   3  505.45   21.60
  -5   9   3  473.35   23.70
   9  -4   3  477.15   22.60
  -9   5  -3  473.35   25.00
   5   4  -3  495.45   22.80
   4  -9  -3  511.05   21.40
   5   4  -3  484.35   22.10
   9  -5   3  469.95   21.60
  -5  -4   3  457.65   23.50
  -4   9   3  514.95   20.40
  -4   9   3  461.75   23.40
   9  -5   3  478.25   22.00
  -5  -4   3  446.66   20.90
  -9   6  -3   42.10    7.50
   6   3  -3   33.60    5.60
   6   3  -3   45.10    7.50
   3  -9  -3   31.20    5.60
   9  -6   3   32.70    5.20
  -6  -3   3   44.50    6.70
  -6  -3   3   45.00    7.30
  -3   9   3   38.70    6.90
  -3   9   3   56.09    6.40
  -9   7  -3  113.09   12.50
   7   2  -3  131.29   11.40
   7   2  -3  130.29   10.20
   2  -9  -3  110.59    9.70
   2  -9  -3  107.59   12.50
  -9   7  -3   95.09   13.90
  -7  -2   3  106.99   12.70
  -7  -2   3  117.79    8.30
  -2   9   3  104.19    8.20
   9  -7   3  104.59    9.00
   1  -9  -3  187.78   15.40
  -9   8  -3  212.88   21.60
   1  -9  -3  204.28   11.70
   8   1  -3  187.78   13.10
   8   1  -3  232.98   13.70
  -9   8  -3  213.88   15.20
  -8  -1   3  208.48   11.50
  -1   9   3  203.98   11.30
   9  -8   3  193.38   12.20
  -8  -1   3  202.68   15.50
  -1   9   3  194.18   11.40
  -9   9  -3   45.10    7.50
  -9   9  -3   66.99   13.80
   9   0  -3   41.40    7.30
   9   0  -3   32.40    6.40
   0  -9  -3   43.60    9.20
   9  -9   3   55.89    7.90
  -9   0   3   45.30    5.80
   0   9   3   49.20    6.20
   0   9   3   40.40    5.80
  -9   0   3   50.59    9.20
  10  -1  -3   42.50    7.80
  -1  -9  -3   46.20    9.90
  -9  10  -3   51.59    8.20
  10  -1  -3   67.79    9.90
  -9  10  -3   64.99   13.90
   9 -10   3   41.50    5.90
 -10   1   3   40.00    5.50
   1   9   3   58.99    8.60
   1   9   3   51.99    8.80
 -10   1   3   33.60    9.30
  -9  11  -3   -4.00   13.20
  11  -2  -3    8.10    5.90
  -2  -9  -3    2.20    9.30
  11  -2  -3    5.10    6.80
  -9  11  -3    1.60    7.30
   9 -11   3   13.40    5.30
 -11   2   3    9.10    4.80
   2   9   3   -1.90    5.10
 -11   2   3    0.50    9.30
   2   9   3    8.10    6.00
  12  -3  -3    8.30    6.90
  -3  -9  -3   -7.60    9.90
  12  -3  -3    9.00    8.30
  -9  12  -3  -13.90    7.70
   3   9   3   -1.40    5.20
   9 -12   3   10.70    5.60
 -12   3   3    1.30    5.30
 -12   3   3    1.80    9.70
   3   9   3   -6.70    6.60
  13  -4  -3  102.19   14.20
  13  -4  -3  114.09   15.90
  -4  -9  -3   87.89   15.70
  -9  13  -3  125.89   15.70
   9 -13   3   80.99   12.80
   4   9   3   78.99   13.50
   9 -13   3   98.29   12.70
 -13   4   3   85.29   14.00
 -13   4   3   89.49   10.60
   4   9   3   89.59   11.00
  -5  -9  -3   51.79   16.40
  14  -5  -3   28.90   11.50
  14  -5  -3   42.90    9.50
  -9  14  -3   26.50   10.40
   9 -14   3   40.40   12.20
   5   9   3   40.80    9.00
 -14   5   3   20.60   12.40
   5   9   3   40.00    7.40
 -14   5   3   21.50    6.80
   9 -14   3   15.20    8.60
  15  -6  -3    9.10    9.90
  -9  15  -3   15.30   11.10
  -6  -9  -3   27.50   17.30
  15  -6  -3   10.90   12.00
 -15   6   3    0.30   13.00
   9 -15   3   -2.80   12.30
   6   9   3    0.00    7.30
   6   9   3    6.20    9.20
  15 -10  -3   65.09   13.90
 -10  -5  -3   55.49   21.00
 -10  -5  -3   84.99   11.60
   5 -15   3   50.79   14.00
  10   5   3  103.19   16.90
 -15  10   3   50.59   13.20
   5 -15   3   77.99   12.40
   5 -15   3  112.49   16.40
  14 -10  -3    1.40   11.60
 -10  -4  -3   44.00    9.80
 -10  -4  -3   30.80   17.20
  10   4   3   27.40    9.30
   4 -14   3   15.40   13.00
   4 -14   3   12.50   10.20
 -14  10   3   21.50   11.30
  13 -10  -3   91.09   12.90
  -3  13  -3   76.19   24.20
  -3  13  -3   84.89   13.00
 -10  -3  -3  100.39   13.00
 -10  -3  -3  105.99   16.70
   3 -13   3   96.69   11.30
  10   3   3   63.09   10.60
 -13  10   3   93.89   12.80
   3 -13   3   71.29   13.10
  12 -10  -3    8.20    8.50
 -10  -2  -3   20.20   12.80
  -2  12  -3   12.90    6.60
  -2  12  -3   32.40   19.20
 -10  -2  -3   28.60    7.20
   2 -12   3   14.80    8.10
 -12  10   3   18.50    5.00
   2 -12   3   24.90   10.20
 -12  10   3   20.70    8.30
  10   2   3   18.50    7.20
  -1  11  -3    6.10    6.20
  11 -10  -3   12.40    7.70
 -10  -1  -3    9.30   11.80
  -1  11  -3   40.50   16.60
 -10  -1  -3   20.80    6.20
  10   1   3    7.90    6.30
   1 -11   3    9.80    7.20
 -11  10   3    6.30    4.50
   1 -11   3   11.90    8.20
 -11  10   3    3.00    8.60
 -10   0  -3  289.97   14.20
   0  10  -3  263.67   16.00
 -10   0  -3  252.27   23.40
   0  10  -3  274.57   24.90
  10 -10  -3  274.37   17.80
   0 -10   3  257.77   16.40
 -10  10   3  255.77   18.10
   0 -10   3  261.67   18.80
  10   0   3  278.77   16.70
 -10  10   3  236.08   12.80
   9 -10  -3   39.70    7.90
   1   9  -3   57.99    9.80
 -10   1  -3   67.49   11.20
   1   9  -3   36.10   12.50
 -10   1  -3   38.60    5.40
  -1  -9   3   48.80    9.00
  -9  10   3   46.70    6.70
  10  -1   3   37.90    6.70
  -1  -9   3   51.49    7.60
  -9  10   3   67.49   10.80
   2   8  -3   -2.40    5.30
   2   8  -3  -11.10   10.40
   8 -10  -3    1.20    5.80
 -10   2  -3    1.40    8.70
  -2  -8   3    2.40    5.10
  10  -2   3   -7.20    5.00
  -8  10   3    2.40    3.60
  -8  10   3    3.20    6.00
  10  -2   3    3.60    5.20
  -2  -8   3    2.00    7.40
   7 -10  -3  200.58   14.10
   3   7  -3  216.98   13.20
 -10   3  -3  208.18   18.90
  10  -3   3  210.08   12.70
  10  -3   3  200.48   13.40
  -3  -7   3  187.68   15.30
  -3  -7   3  198.68   12.80
  -7  10   3  192.88   10.70
  -7  10   3  176.48   14.30
   6 -10  -3  225.48   14.60
   4   6  -3  239.08   13.90
 -10   4  -3  242.28   18.30
  -4  -6   3  233.38   13.00
  10  -4   3  229.08   13.80
  -6  10   3  231.68   11.80
  10  -4   3  221.18   13.90
  -4  -6   3  188.78   15.60
  -6  10   3  251.47   15.50
   5   5  -3    9.50    4.70
   5 -10  -3   -4.70    5.10
 -10   5  -3   -3.00    6.50
  10  -5   3    0.30    4.40
  -5  -5   3   -9.90    6.80
  -5  10   3  -12.10    5.80
  -5  -5   3   -1.50    4.10
  -5  10   3   -0.80    3.30
  10  -5   3   -6.50    5.50
   6   4  -3  223.38   14.10
 -10   6  -3  235.18   17.60
   4 -10  -3  221.28   14.20
  -6  -4   3  222.98   16.40
  -4  10   3  230.98   15.60
  10  -6   3  247.38   14.40
  -4  10   3  223.88   12.10
  10  -6   3  241.48   13.40
  -6  -4   3  233.28   12.80
   7   3  -3  168.18   15.00
   3 -10  -3  196.18   13.50
   3 -10  -3  224.28   16.00
 -10   7  -3  199.48   16.10
   7   3  -3  186.08   13.50
  -3  10   3  192.38   11.50
  -7  -3   3  201.88   16.40
  -7  -3   3  202.88   12.00
  10  -7   3  216.68   14.20
  10  -7   3  209.18   12.80
   8   2  -3    9.20    7.50
   8   2  -3    7.40    5.20
   2 -10  -3   -3.70    5.50
 -10   8  -3    7.80    7.10
   2 -10  -3   -1.10    7.10
  10  -8   3    0.10    4.50
  -8  -2   3    5.80    4.40
  -2  10   3    8.80    4.30
  -8  -2   3   13.40    8.10
  10  -8   3   -0.70    6.00
   9   1  -3   47.30    8.20
   9   1  -3   38.90    7.10
 -10   9  -3   36.70    9.00
   1 -10  -3   35.00    8.90
  10  -9   3   35.70    6.10
  -1  10   3   49.30    6.30
  10  -9   3   41.40    8.00
  -1  10   3   60.99    9.00
  -9  -1   3   46.10    6.00
  -9  -1   3   56.79   10.10
   0 -10  -3  282.57   21.10
 -10  10  -3  259.47   18.70
  10   0  -3  231.58   16.70
  10   0  -3  278.57   17.40
   0  10   3  271.27   15.20
 -10   0   3  273.17   14.40
   0  10   3  261.57   15.30
  10 -10   3  271.47   17.60
 -10   0   3  311.37   20.20
  10 -10   3  278.87   15.60
  -1 -10  -3    8.50    9.90
 -10  11  -3    9.20    8.00
  11  -1  -3   16.80    6.80
  11  -1  -3   19.00    8.40
  10 -11   3   12.60    5.60
 -11   1   3    2.70    9.50
  10 -11   3    5.20    7.60
   1  10   3    9.70    5.70
 -11   1   3   12.50    5.30
   1  10   3   15.80    6.00
  12  -2  -3   12.20    9.30
 -10  12  -3   18.50    9.20
  12  -2  -3   33.70    7.30
  -2 -10  -3    7.80   10.90
 -12   2   3    6.10   10.80
  10 -12   3   12.60    6.60
 -12   2   3   24.40    6.10
   2  10   3   20.30    6.90
   2  10   3   13.20    6.40
  10 -12   3   26.40    9.80
  13  -3  -3  115.39   14.40
  13  -3  -3  114.59   16.40
 -10  13  -3   89.59   12.30
  -3 -10  -3   79.39   15.80
  10 -13   3  124.09   16.30
 -13   3   3   91.69   14.00
 -13   3   3   90.09   11.00
   3  10   3  107.49   13.30
  10 -13   3   96.59   12.80
   3  10   3   85.69    9.90
 -10  14  -3   35.80   10.70
  14  -4  -3   34.50    9.60
  14  -4  -3   37.60   11.30
  -4 -10  -3   24.30   15.00
  10 -14   3   28.60    8.20
   4  10   3   22.40    7.90
 -14   4   3   21.30    7.50
   4  10   3   22.10    7.40
  10 -14   3   29.00   11.30
 -14   4   3   14.90   11.60
  -5 -10  -3   86.79   20.40
  15  -5  -3  101.39   17.00
  15  -5  -3   81.59   14.80
 -10  15  -3   72.49   13.60
   5  10   3   69.89   10.00
   5  10   3   62.39   10.10
 -15   5   3   57.49   15.00
  10 -15   3   68.79   10.50
  10 -15   3   48.90   13.60
  -3  14  -3  144.69   15.60
  14 -11  -3  129.69   16.90
 -11  -3  -3  119.49   21.00
 -11  -3  -3  127.79   15.20
   3 -14   3   93.49   15.90
   3 -14   3  120.59   13.20
  11   3   3   93.39   12.90
 -14  11   3  120.79   18.10
 -11  -2  -3   15.00   15.60
  13 -11  -3   50.89   13.00
 -11  -2  -3   51.09    8.70
  -2  13  -3   51.49   23.30
  -2  13  -3   52.79    8.50
 -13  11   3   48.80   12.10
   2 -13   3   49.20   12.50
   2 -13   3   46.90   10.00
  11   2   3   44.20    9.70
 -11  -1  -3   89.49   16.50
  12 -11  -3   98.09   13.20
  -1  12  -3  116.09   21.70
  -1  12  -3   90.69   12.70
 -11  -1  -3   93.09   11.70
   1 -12   3   95.09   14.40
   1 -12   3  121.19   18.00
  11   1   3  116.09   14.10
 -12  11   3   90.19    9.40
 -12  11   3   77.19   12.10
 -11   0  -3  545.55   33.60
  11 -11  -3  537.15   27.40
   0  11  -3  517.25   36.30
 -11   0  -3  528.15   23.30
   0  11  -3  503.05   25.70
  11   0   3  534.35   26.40
   0 -11   3  487.65   28.60
 -11  11   3  525.45   28.10
   0 -11   3  512.25   25.60
 -11  11   3  472.05   22.10
   1  10  -3   -0.70   14.10
 -11   1  -3   18.00   11.40
  10 -11  -3   14.40    9.00
   1  10  -3    9.80    6.40
 -11   1  -3   15.60    5.70
  11  -1   3    8.20    6.40
 -10  11   3   12.30    4.80
  -1 -10   3    3.30    9.30
  -1 -10   3   14.10    6.70
 -10  11   3   23.50    8.00
 -11   2  -3    9.40    4.60
 -11   2  -3    5.50   10.20
   9 -11  -3    4.10    7.10
   2   9  -3   -9.90   11.60
   2   9  -3    1.50    6.80
  -9  11   3    5.60    6.90
  -2  -9   3    6.00    6.20
  11  -2   3    4.20    6.40
  -2  -9   3    1.60    8.50
  11  -2   3    0.40    6.00
  -9  11   3    1.90    4.30
   3   8  -3  176.08   13.20
 -11   3  -3  168.08   19.60
   8 -11  -3  176.18   15.10
  -8  11   3  173.28   15.20
  11  -3   3  162.78   13.70
  -3  -8   3  179.18   12.90
  -8  11   3  176.08   10.50
  11  -3   3  166.18   12.90
  -3  -8   3  166.88   16.60
   4   7  -3   24.40    6.40
   7 -11  -3   21.00    7.30
 -11   4  -3   37.50    9.40
  11  -4   3   23.10    6.20
  -7  11   3   30.90    5.20
  -7  11   3   24.80    7.20
  -4  -7   3   19.40    8.40
  -4  -7   3   30.40    6.10
  11  -4   3   30.50    6.90
 -11   5  -3    0.30    7.50
   5   6  -3    0.20    5.60
   6 -11  -3    0.60    6.70
  -5  -6   3   -0.30    4.80
  -6  11   3   -2.20    3.90
  11  -5   3    1.30    4.90
  -5  -6   3  -11.20    7.90
  11  -5   3    3.00    5.90
   5 -11  -3   -5.50    6.40
   6   5  -3    7.70    5.00
 -11   6  -3   -6.20    7.50
  -5  11   3    7.20    4.10
  -6  -5   3   -2.60    4.70
  -5  11   3    3.10    6.80
  11  -6   3   -0.30    6.30
  -6  -5   3    2.50    7.40
  11  -6   3   -1.40    4.70
   7   4  -3   24.40    6.30
   4 -11  -3   20.60    6.90
 -11   7  -3   23.30    9.10
  -4  11   3   33.60    8.40
  11  -7   3   28.50    7.50
  -7  -4   3   23.80    9.00
  -4  11   3   25.90    5.20
  -7  -4   3   28.30    5.90
  11  -7   3   31.80    5.60
   3 -11  -3  173.18   16.50
 -11   8  -3  154.08   16.50
   3 -11  -3  170.58   14.00
   8   3  -3  181.58   13.30
  -3  11   3  179.78   11.90
  11  -8   3  178.68   13.00
  11  -8   3  179.78   15.00
  -8  -3   3  183.28   17.60
  -8  -3   3  162.58   11.80
   9   2  -3    6.50    6.50
 -11   9  -3   17.70    8.00
   2 -11  -3    4.00    6.70
   9   2  -3   30.50    9.30
   2 -11  -3    3.60    8.60
  11  -9   3   -5.50    5.40
  11  -9   3    8.80    6.80
  -9  -2   3    8.60    9.10
  -9  -2   3    6.70    5.20
  -2  11   3    2.80    5.30
 -11  10  -3   14.80    8.20
   1 -11  -3   23.70    9.60
  10   1  -3    8.20    6.50
  10   1  -3    3.40    9.00
  -1  11   3   17.60    5.70
 -10  -1   3   14.90    5.50
  11 -10   3   17.40    8.10
  -1  11   3    2.10    5.80
  11 -10   3   10.00    5.60
 -10  -1   3   25.40   10.30
  11   0  -3  532.65   26.50
   0 -11  -3  536.35   31.30
 -11  11  -3  499.25   27.60
  11   0  -3  474.25   25.90
 -11   0   3  513.35   29.60
  11 -11   3  500.95   24.90
   0  11   3  459.35   24.00
  11 -11   3  526.05   26.30
   0  11   3  514.55   24.10
 -11   0   3  535.95   23.20
 -11  12  -3  100.19   16.30
  -1 -11  -3  104.09   15.60
  12  -1  -3  123.79   17.50
  12  -1  -3   77.99   10.80
 -12   1   3   89.19   14.30
 -12   1   3  107.49   10.80
   1  11   3   90.29   12.60
   1  11   3   92.39   12.00
  11 -12   3   98.09   13.10
  11 -12   3   93.29   12.80
  13  -2  -3   63.49   11.60
  -2 -11  -3   65.79   14.70
  13  -2  -3   46.90    9.70
 -11  13  -3   26.40   11.20
 -13   2   3   51.99    8.40
  11 -13   3   48.90   11.90
  11 -13   3   65.69    8.80
   2  11   3   41.90    8.20
   2  11   3   54.99    8.70
 -13   2   3   29.80   12.80
 -11  14  -3  127.09   18.20
  14  -3  -3  141.29   17.00
  14  -3  -3  105.79   14.60
  -3 -11  -3  125.99   18.70
   3  11   3  126.39   13.60
 -14   3   3  141.89   13.10
  11 -14   3  122.89   15.60
   3  11   3  113.19   15.50
  11 -14   3  113.89   14.70
 -14   3   3   88.89   16.50
 -11  15  -3   52.99   12.90
 -12  -2  -3  144.99   21.80
  -2  14  -3  128.59   16.00
  14 -12  -3  135.39   17.20
 -12  -2  -3  148.49   15.40
   2 -14   3  122.69   17.70
   2 -14   3  150.78   24.20
 -14  12   3   98.39   15.60
  -1  13  -3   -3.10    7.70
 -12  -1  -3   46.80   16.30
 -12  -1  -3   23.40    8.30
  -1  13  -3   13.00   23.20
  13 -12  -3    3.40   10.80
 -13  12   3  -10.10   10.40
   1 -13   3  -16.30   13.40
   1 -13   3   11.70    9.40
  12   1   3   20.10   10.00
  12 -12  -3   15.20   11.50
   0  12  -3   20.10    8.00
 -12   0  -3   22.50    7.30
 -12   0  -3   27.90   13.90
   0  12  -3   34.40   20.30
   0 -12   3    9.30   12.20
  12   0   3   17.10    8.40
 -12  12   3   21.70   10.30
   0 -12   3   17.10    8.70
 -12   1  -3   97.99   11.20
 -12   1  -3   82.19   15.50
   1  11  -3   86.89   19.50
  11 -12  -3  127.89   17.20
   1  11  -3   89.19   13.00
  12  -1   3  112.69   14.20
 -11  12   3  104.79   15.20
  -1 -11   3   84.99   13.50
 -11  12   3   74.69    9.90
  -1 -11   3  105.79   13.80
  10 -12  -3   13.30    9.10
 -12   2  -3    8.50   11.70
 -10  12   3   15.60    8.40
  12  -2   3   16.20    7.80
  -2 -10   3   10.30   10.10
  -2 -10   3   17.90    7.20
  12  -2   3   10.80    7.30
 -10  12   3   13.90    5.50
 -12   3  -3    6.30   11.00
   3   9  -3   -2.90    7.10
   9 -12  -3   -0.10    7.70
  -9  12   3   -5.60    7.50
  12  -3   3    1.70    7.10
  -3  -9   3    3.80    9.50
  -9  12   3   -3.40    4.50
  12  -3   3    6.30    6.50
  -3  -9   3    9.90    6.70
 -12   4  -3  258.27   21.80
   4   8  -3  233.28   15.80
   8 -12  -3  205.58   17.30
  -8  12   3  215.68   16.50
  -8  12   3  210.68   12.60
  -4  -8   3  213.68   14.60
  12  -4   3  221.58   15.70
  12  -4   3  218.88   16.30
  -4  -8   3  166.68   19.40
 -12   5  -3   60.19   11.30
   5   7  -3   68.59   11.40
   7 -12  -3   64.09   10.40
  12  -5   3   56.79    8.40
  -5  -7   3   49.00    7.40
  12  -5   3   51.19    7.90
  -7  12   3   49.80    9.50
  -5  -7   3   60.19   11.00
  -7  12   3   83.29    8.80
 -12   6  -3    4.50    9.10
   6   6  -3    0.10    6.00
   6 -12  -3   -5.50    7.90
  12  -6   3   -4.90    5.90
  -6  12   3    4.20    4.80
  12  -6   3   -6.30    7.00
  -6  -6   3   -3.00    9.90
  -6  12   3   -2.80    7.40
   5 -12  -3   56.19    9.30
 -12   7  -3   51.09   10.90
   7   5  -3   52.79    8.00
  -5  12   3   69.19    8.80
  -5  12   3   64.19   10.60
  12  -7   3   57.09    7.90
  -7  -5   3   67.39   11.30
  -7  -5   3   61.39    9.80
  12  -7   3   67.29    9.60
 -12   8  -3  206.68   19.30
   4 -12  -3  263.67   19.50
   4 -12  -3  233.18   16.90
   8   4  -3  222.28   15.80
  -4  12   3  224.38   13.70
  12  -8   3  243.48   15.30
  12  -8   3  238.58   17.00
  -8  -4   3  210.48   13.90
  -8  -4   3  185.68   20.40
   3 -12  -3  -11.40    8.50
 -12   9  -3   -6.60    8.50
   3 -12  -3    2.80    7.50
   9   3  -3    5.00    6.90
  12  -9   3    2.80    8.20
  -3  12   3    5.50    5.90
  -9  -3   3   13.60    5.80
  -9  -3   3  -16.30    9.40
  12  -9   3    3.70    5.80
   2 -12  -3    5.20    9.90
   2 -12  -3   16.60    8.30
 -12  10  -3    8.00    9.10
  10   2  -3   19.60    7.30
  12 -10   3    5.40    8.80
  -2  12   3   19.80    6.30
 -10  -2   3   24.50    6.30
  12 -10   3   13.20    6.60
 -10  -2   3   18.80   11.30
  11   1  -3   87.79   13.30
 -12  11  -3   82.39   13.10
   1 -12  -3   86.89   14.50
  12 -11   3  106.79   13.60
 -11  -1   3  142.99   19.80
  -1  12   3  113.59   12.00
 -11  -1   3   94.89   11.30
  12 -11   3   90.89   13.20
  -1  12   3   99.19   12.10
 -12  12  -3   20.60   10.20
  12   0  -3   -0.60    7.80
   0 -12  -3   13.90   13.70
  12 -12   3   16.90    7.70
   0  12   3   24.80    8.00
  12 -12   3   18.10   10.20
 -12   0   3    8.80    7.00
 -12   0   3   24.30   12.60
  -1 -12  -3  -28.00   13.70
 -12  13  -3   15.80   10.60
  13  -1  -3  -17.10    9.00
   1  12   3    4.50    9.00
 -13   1   3    7.30    7.30
  12 -13   3    5.70   11.30
   1  12   3   -2.70    7.40
 -13   1   3    8.40   13.00
  12 -13   3   -1.80    8.00
  14  -2  -3   77.19   12.50
 -12  14  -3  125.69   15.30
  -2 -12  -3  122.99   19.40
  12 -14   3  131.09   16.70
 -14   2   3  102.19   17.00
 -14   2   3  136.29   14.40
   2  12   3   94.19   13.80
  12 -14   3  113.39   15.40
 -13   0  -3   -4.20   15.90
   0  13  -3   -1.30    8.90
  13 -13  -3   -4.10   10.90
 -13  13   3    8.70   10.30
  13   0   3   -4.30    9.00
   0 -13   3  -13.40   10.30
   1  12  -3   -0.80    8.30
 -13   1  -3    0.70   15.20
  12 -13  -3   25.90   11.30
  -1 -12   3   16.90   14.60
  -1 -12   3    5.70    9.40
 -12  13   3   13.70   10.20
  13  -1   3   22.00    9.50
   2  11  -3   48.40    9.40
  11 -13  -3   61.89   12.80
 -13   2  -3   58.39   14.90
  -2 -11   3   90.29   13.90
 -11  13   3   46.50    7.10
  13  -2   3   54.79    9.60
  -2 -11   3   35.90   13.20
 -11  13   3   43.50   11.30
  10 -13  -3  111.69   17.20
 -13   3  -3  132.09   22.10
   3  10  -3   81.69   10.80
 -10  13   3   93.59   13.00
  -3 -10   3  101.79   13.90
  13  -3   3   98.79   15.10
 -10  13   3   90.99   10.60
  13  -3   3   80.59   10.70
  -3 -10   3   82.29   13.30
 -13   4  -3  140.09   21.80
   4   9  -3   89.99   13.70
   9 -13  -3   90.39   12.40
  -9  13   3  101.19   14.70
  13  -4   3   94.99   14.70
  -9  13   3  113.39   10.60
  13  -4   3   98.79   14.40
  -4  -9   3  105.49   12.90
  -4  -9   3  130.59   19.50
   8 -13  -3   47.30   10.30
 -13   5  -3   43.30   12.80
   5   8  -3   34.90    8.40
  -5  -8   3   31.50    7.40
  -8  13   3   39.00    9.60
  13  -5   3   37.40    8.80
  -8  13   3   43.60    6.60
  13  -5   3   22.20    9.30
  -5  -8   3   40.90   11.50
 -13   6  -3  236.38   22.70
   6   7  -3  275.77   17.90
   7 -13  -3  262.87   19.80
  13  -6   3  265.67   17.70
  -7  13   3  275.77   15.60
  -6  -7   3  260.47   16.90
  -7  13   3  249.18   20.10
  -6  -7   3  243.08   22.90
  13  -6   3  302.07   18.80
   6 -13  -3  294.47   20.30
   7   6  -3  281.97   18.00
 -13   7  -3  246.48   22.50
  13  -7   3  287.37   18.70
  -7  -6   3  226.78   22.60
  -6  13   3  249.28   20.40
  -6  13   3  267.27   15.50
  13  -7   3  306.07   19.10
  -7  -6   3  264.27   16.60
   5 -13  -3   49.10   10.70
 -13   8  -3   36.30   11.20
   8   5  -3   32.30    7.60
   5 -13  -3   34.10    9.90
  13  -8   3   31.80    7.90
  -8  -5   3    9.60   11.90
  -8  -5   3   39.70    7.70
  13  -8   3   50.39   10.20
  -5  13   3   43.60    7.00
   9   4  -3   94.39   13.40
   4 -13  -3  114.99   15.70
 -13   9  -3   77.89   12.80
   4 -13  -3   93.89   13.90
  -4  13   3   95.39   11.70
  13  -9   3  107.79   13.60
  -9  -4   3   88.69   13.70
  13  -9   3  118.29   15.40
  -9  -4   3   78.49   11.20
   3 -13  -3   85.99   13.40
   3 -13  -3   81.99   11.00
 -13  10  -3   75.49   13.30
  10   3  -3   88.99   14.10
  13 -10   3  106.49   16.40
  -3  13   3  105.49   12.10
 -10  -3   3   94.89   11.50
  13 -10   3  124.89   13.50
 -10  -3   3   73.89   13.90
  11   2  -3   50.79    9.10
 -13  11  -3   34.50   10.90
   2 -13  -3   66.49   12.80
  13 -11   3   36.20    8.60
  -2  13   3   58.39    8.80
 -11  -2   3   51.69   14.00
 -11  -2   3   49.40    8.10
  13 -11   3   59.49   12.10
   1 -13  -3   -0.90   13.60
 -13  12  -3   22.70   11.40
  12   1  -3    7.30    8.70
  -1  13   3   11.40    7.70
  -1  13   3   -5.50    7.60
  13 -12   3    5.80    8.30
  13 -12   3   14.90   10.30
 -12  -1   3   17.40   13.10
 -12  -1   3   13.00    7.10
   0 -13  -3   12.40   15.40
 -13  13  -3  -10.50   11.00
  13   0  -3    2.40    9.20
   0  13   3   -7.50    7.90
   0  13   3   -0.30   10.30
  13 -13   3    1.80    9.10
 -13   0   3   -4.90    7.70
 -13   0   3   -7.00   13.60
  13 -13   3   14.00   11.30
 -14   2  -3  110.39   19.00
  12 -14  -3  143.39   21.50
   2  12  -3   99.19   17.00
  14  -2   3  120.19   17.40
 -12  14   3  108.39   14.20
   3  11  -3  135.09   15.90
  11 -14  -3  136.69   20.70
 -14   3  -3  117.69   17.60
 -11  14   3  123.89   17.70
  -3 -11   3  116.59   16.70
  14  -3   3   81.89   11.90
  10 -14  -3   28.70   12.70
 -14   4  -3   22.60   13.70
   4  10  -3   11.40    8.90
 -10  14   3   23.70   10.20
  -4 -10   3   31.20    9.70
  14  -4   3   15.70    9.30
 -10  14   3   26.30    7.20
  14  -4   3    9.80   10.00
   5   9  -3   44.90    9.20
   9 -14  -3   53.29   13.00
 -14   5  -3   41.70   13.90
  -9  14   3   45.00    7.90
  14  -5   3   39.30    9.60
  -5  -9   3   20.50    8.90
  -9  14   3   26.60   10.90
  14  -5   3   52.39   10.50
   6   8  -3   43.40    8.80
 -14   6  -3   45.10   13.70
   8 -14  -3   53.49   12.70
  -8  14   3   62.09    8.50
  -8  14   3   40.70   12.10
  14  -6   3   44.50    9.70
  -6  -8   3   42.90    8.90
  14  -6   3   28.60   11.10
 -14   7  -3   -6.40   11.80
   7 -14  -3    7.40   11.10
   7   7  -3    7.90    8.00
  -7  14   3    9.70    6.60
  14  -7   3   20.80    9.90
  -7  -7   3  -13.30   13.40
  -7  14   3    7.10   10.40
  14  -7   3   -1.60    7.50
  -7  -7   3   -5.40    7.20
 -14   8  -3   29.50   12.80
   6 -14  -3   51.19   11.70
   8   6  -3   48.30    9.30
  -8  -6   3   37.10   13.90
  -6  14   3   33.90   11.20
  14  -8   3   53.49    9.90
  14  -8   3   64.09   11.20
  -6  14   3   54.39    8.50
  -8  -6   3   51.69    8.70
   5 -14  -3   34.50   12.70
   9   5  -3   19.10    8.60
   5 -14  -3   41.20   11.40
 -14   9  -3   26.00   12.50
  14  -9   3   40.50    9.20
  -9  -5   3   31.50    8.80
  -5  14   3   36.50    8.30
  14  -9   3   44.20   10.80
  -9  -5   3   50.19   14.30
 -14  10  -3   12.30   11.60
  10   4  -3   15.90    8.80
   4 -14  -3  -10.40   10.40
   4 -14  -3   34.10   13.10
  -4  14   3   20.90    7.50
  14 -10   3   22.00    9.00
 -10  -4   3   26.40   14.30
  14 -10   3   30.30   11.70
 -10  -4   3   42.30    8.30
   3 -14  -3  116.99   16.40
 -14  11  -3  112.69   19.00
  11   3  -3  110.69   15.80
  -3  14   3  109.09   14.30
  14 -11   3  134.09   20.30
  14 -11   3  142.69   16.40
 -11  -3   3  115.29   17.90
 -11  -3   3  121.49   13.60
   2 -14  -3  103.89   18.60
 -14  12  -3  112.39   16.10
  12   2  -3  116.69   16.40
  14 -12   3  162.98   16.90
  -2  14   3  103.29   15.30
 -12  -2   3  187.68   25.40
 -12  -2   3  113.09   14.50
  14 -12   3  143.79   20.40
 -11  15   3   45.80   12.00
  10 -15  -3   99.79   15.30
   5  10  -3   51.79   11.00
 -15   5  -3   80.39   17.20
  15  -5   3   67.79   12.40
 -10  15   3   66.29    9.50
  15  -5   3   62.59   13.20
  -5 -10   3   69.99   11.30
 -10  15   3   99.99   14.60
   6   9  -3   21.30    9.70
 -15   6  -3   17.80   14.50
   9 -15  -3   11.20   12.00
  -9  15   3   21.90    8.10
  -6  -9   3    9.20    9.70
  15  -6   3    2.60   11.70
  -9  15   3  -16.50   11.60
  15  -6   3   11.40    9.50
 -15   7  -3    1.70   13.90
   7   8  -3   11.20    9.20
   8 -15  -3   30.50   13.10
  15  -7   3   13.70   11.80
  -8  15   3   19.90    8.30
  -8  15   3   29.70   12.60
  -7  -8   3   20.30    9.20
  15  -7   3    0.30    9.70
   8   7  -3   17.30    9.60
 -15   8  -3   18.10   13.30
   7 -15  -3   31.10   12.50
  -7  15   3   15.60   11.60
  15  -8   3   14.90    9.80
  15  -8   3    4.90   12.20
  -8  -7   3   24.10    9.50
  -7  15   3   14.40    8.00
   9   6  -3   25.80    9.30
   6 -15  -3    8.40   12.40
 -15   9  -3   13.50   12.80
   6 -15  -3   31.30   13.10
  -9  -6   3   -3.70    8.50
  15  -9   3   -6.60    9.60
  -6  15   3   14.60    7.80
  15  -9   3   35.30   12.90
   5 -15  -3   63.89   15.80
 -15  10  -3   64.39   14.40
  10   5  -3   73.19   10.70
  -5  15   3   97.79   14.30
  15 -10   3   63.19   11.40
  15 -10   3   80.79   14.10
 -10  -5   3   84.79   13.60
   0   0  -4 5263.07  208.68
   0   0  -4 5062.89  189.28
   0   0   4 5382.16  196.58
   0   0   4 5714.93  209.28
   0   0   4 5208.58  208.48
   1  -1  -4   16.80    2.40
   0   1  -4   16.20    3.30
  -1   0  -4   17.60    3.40
  -1   0  -4   17.00    2.90
   1  -1  -4   22.80    3.10
   1  -1  -4   15.10    2.20
   1   0   4   25.00    4.00
  -1   1   4   15.80    2.00
   1   0   4   13.20    2.30
   1   0   4   14.20    1.80
   0  -1   4   11.40    1.90
  -1   1  -4   19.10    3.80
   0  -1  -4   12.60    1.80
   0  -1  -4   15.70    2.70
   0  -1  -4   14.50    2.90
  -1   1  -4   13.30    2.40
  -1   1  -4   12.70    1.70
   1   0  -4   15.70    3.00
   1   0  -4   17.60    2.10
   0   1   4   14.10    2.20
   0   1   4   12.40    1.80
   1  -1   4   18.70    2.50
  -1   0   4   11.40    2.20
  -1   0   4   13.20    2.10
   1  -1   4   13.70    2.60
   1  -1   4   18.60    1.90
   2  -1  -4 2042.80   75.19
  -1  -1  -4 2064.79   83.19
  -1   2  -4 2165.08   76.39
   2  -1  -4 1940.71   81.89
  -1  -1  -4 2000.70   74.89
  -2   1   4 2144.49   81.99
   1  -2   4 2308.77   82.39
   1  -2   4 2060.19   77.19
  -2   1   4 2049.99   77.49
   1   1   4 2085.39   82.39
   1   1   4 2029.90   77.29
   3  -2  -4    3.10    2.40
  -1   3  -4   -0.60    4.10
  -2  -1  -4   -4.10    3.00
  -1   3  -4    3.30    2.10
  -2  -1  -4    2.40    2.80
   2   1   4    2.70    1.50
   2   1   4    2.90    1.30
  -3   2   4    4.20    1.50
  -3   2   4    4.90    1.80
   2   1   4    6.30    2.70
   1  -3   4    5.00    1.40
  -2   0  -4 1674.13   68.49
   2  -2  -4 1638.04   61.69
  -2   0  -4 1834.02   62.19
   0   2  -4 1671.23   62.69
   0   2  -4 1782.12   67.59
   2   0   4 1697.93   67.59
   0  -2   4 1631.04   63.29
  -2   2   4 1742.13   67.39
  -2   2   4 1665.23   63.39
   2   0   4 1651.23   62.99
   1  -2  -4 1916.11   74.19
  -2   1  -4 2209.18   75.49
  -2   1  -4 1891.91   76.39
  -2   1  -4 2028.60   82.39
   1   1  -4 2013.60   74.89
   1  -2  -4 2244.48   82.19
   1   1  -4 2175.88   81.69
  -1  -1   4 2008.00   76.79
   2  -1   4 2080.89   76.39
  -1   2   4 2051.39   76.79
   2  -1   4 2072.39   81.89
   0  -2  -4 1614.24   59.29
  -2   2  -4 1784.72   61.19
  -2   2  -4 1422.26   60.69
  -2   2  -4 1585.44   65.59
   2   0  -4 1715.83   64.99
   2   0  -4 1626.04   59.79
   0  -2  -4 1687.43   65.89
   2  -2   4 1595.24   65.69
   0   2   4 1570.14   61.09
   2  -2   4 1712.23   60.79
  -2   0   4 1622.24   61.29
   2  -2   4 1747.63   65.39
  -1  -2  -4    3.30    2.80
   3  -1  -4    0.90    2.30
   3  -1  -4    3.00    2.30
  -2   3  -4    4.90    2.10
   3  -1  -4    5.30    1.60
  -2   3  -4    7.50    4.20
  -2   3  -4    7.40    1.50
  -1  -2  -4    6.00    2.50
   2  -3   4    5.20    1.90
   1   2   4    3.10    1.50
   2  -3   4    4.10    3.00
   2  -3   4    3.90    1.00
   1   2   4    5.90    2.20
  -3   1   4    3.70    1.70
  -3   1   4    3.30    1.50
   1   2   4    4.70    1.40
  -2  -2  -4  294.27   14.50
   4  -2  -4  285.27   12.70
  -2   4  -4  255.87   12.40
  -2   4  -4  270.27   15.10
   2   2   4  281.77   11.50
   2  -4   4  260.17   13.50
   2   2   4  264.67   12.40
   2  -4   4  266.77   11.20
  -4   2   4  273.57   11.60
  -4   2   4  300.47   12.70
  -3  -2  -4  236.38   13.60
  -2   5  -4  225.08   11.10
  -2   5  -4  216.68   10.80
  -2   5  -4  229.48   14.30
   5  -3  -4  235.08   11.40
   2  -5   4  226.38   10.10
  -5   3   4  245.28   11.60
   3   2   4  231.38   11.20
   3   2   4  227.98   10.10
  -5   3   4  237.28   10.20
  -1   4  -4   37.60    6.20
  -1   4  -4   41.80    4.60
  -3  -1  -4   40.90    6.40
   4  -3  -4   38.40    5.00
  -4   3   4   39.30    3.40
   3   1   4   41.10    4.10
   3   1   4   40.00    3.30
   1  -4   4   45.70    3.60
  -4   3   4   39.10    4.50
   0   3  -4  481.25   20.90
  -3   0  -4  484.15   19.90
   3  -3  -4  472.55   19.30
  -3   0  -4  486.85   22.00
   0   3  -4  487.85   20.30
   3   0   4  478.85   18.50
  -3   3   4  471.85   18.80
   3   0   4  467.15   20.30
  -3   3   4  494.75   20.50
   0  -3   4  463.85   18.90
   2  -3  -4    3.60    2.30
   1   2  -4    6.50    3.40
   1   2  -4    5.50    2.00
  -3   1  -4    6.00    3.70
  -3   1  -4    2.50    1.20
  -3   1  -4    3.30    2.90
  -2   3   4    3.00    1.40
   3  -1   4    3.40    1.00
  -1  -2   4    4.20    1.50
  -2   3   4    4.20    2.00
   3  -1   4    2.70    1.50
   1  -3  -4    7.30    2.50
  -3   2  -4    3.00    3.70
  -3   2  -4    5.10    2.90
   1  -3  -4    2.70    2.20
   2   1  -4    4.90    2.90
   2   1  -4    8.30    2.00
  -2  -1   4    4.50    1.60
  -1   3   4    4.00    1.30
   3  -2   4    2.20    1.60
   0  -3  -4  471.95   21.00
  -3   3  -4  495.15   21.20
   3   0  -4  476.85   19.60
  -3   3  -4  467.85   20.70
   3   0  -4  476.45   19.30
   0  -3  -4  437.46   18.20
   3  -3   4  498.45   20.00
   0   3   4  468.35   18.50
  -3   0   4  453.45   18.60
  -1  -3  -4   45.00    6.30
  -3   4  -4   36.30    6.40
  -3   4  -4   48.00    5.00
  -1  -3  -4   35.20    4.60
   4  -1  -4   41.40    4.10
   4  -1  -4   41.80    5.20
  -4   1   4   41.00    4.30
   1   3   4   41.70    3.60
   1   3   4   45.50    4.20
  -4   1   4   39.50    3.60
   3  -4   4   45.00    4.30
   5  -2  -4  246.08   11.70
  -3   5  -4  233.48   14.80
  -3   5  -4  241.58   11.70
  -2  -3  -4  236.58   13.60
   3  -5   4  225.48   11.10
   2   3   4  230.58   11.40
  -5   2   4  223.88   10.40
   2   3   4  242.78   10.50
  -5   2   4  238.78   11.70
   3  -5   4  265.87   10.10
  -3   6  -4 1905.81   76.99
   6  -3  -4 1956.70   70.99
  -3  -3  -4 1892.81   79.59
  -3   6  -4 1929.51   73.69
   3   3   4 1922.81   72.49
  -6   3   4 1984.80   77.59
  -6   3   4 1837.72   72.39
   3  -6   4 2044.50   72.39
   3   3   4 1890.31   77.49
   7  -4  -4    3.70    3.60
  -3   7  -4   -1.70    3.10
  -4  -3  -4    9.10    5.30
  -3   7  -4   -0.30    7.50
   4   3   4   -0.80    2.30
   4   3   4    4.00    3.30
   3  -7   4    0.30    2.80
  -7   4   4    5.10    2.40
  -7   4   4   -1.10    3.60
  -2   6  -4  155.48    9.10
  -2   6  -4  193.58   14.20
  -4  -2  -4  184.48   12.60
  -2   6  -4  180.28    9.80
   6  -4  -4  185.18   10.10
   2  -6   4  175.98    8.80
  -6   4   4  182.18    8.50
   4   2   4  177.28    8.50
  -6   4   4  174.18   10.30
   4   2   4  182.28   10.00
   5  -4  -4  676.53   27.20
  -1   5  -4  719.13   29.00
  -4  -1  -4  672.83   31.10
  -1   5  -4  670.13   29.50
  -5   4   4  743.23   29.50
   4   1   4  698.73   26.70
   1  -5   4  700.83   27.10
  -5   4   4  661.43   26.70
   4   1   4  661.63   28.90
  -4   0  -4  339.57   16.80
   0   4  -4  349.47   17.40
   0   4  -4  331.17   14.70
  -4   0  -4  343.97   15.50
   4  -4  -4  324.37   14.30
   0  -4   4  314.07   13.70
   4   0   4  323.47   13.10
   4   0   4  313.27   14.50
  -4   4   4  328.47   14.90
  -4   4   4  295.57   13.20
   1   3  -4   34.90    5.90
  -4   1  -4   41.90    6.70
  -4   1  -4   30.50    2.90
   3  -4  -4   37.80    4.50
  -4   1  -4   43.30    5.90
   1   3  -4   48.90    4.50
   4  -1   4   36.70    2.90
  -1  -3   4   40.40    3.60
  -3   4   4   44.90    4.50
  -3   4   4   40.90    3.40
   4  -1   4   42.40    4.10
   2   2  -4  276.97   12.50
   2  -4  -4  260.77   12.10
  -4   2  -4  300.77   14.70
  -4   2  -4  296.07   14.50
   2   2  -4  274.77   13.40
  -2   4   4  278.47   13.20
   4  -2   4  270.77   12.60
  -2  -2   4  264.67   11.80
  -2   4   4  262.17   11.40
   3   1  -4   46.40    4.60
  -4   3  -4   38.20    5.70
   3   1  -4   44.90    6.20
  -4   3  -4   36.80    5.90
   1  -4  -4   41.60    5.50
   1  -4  -4   37.40    4.70
  -1   4   4   44.80    3.50
   4  -3   4   41.10    4.10
  -3  -1   4   42.20    3.70
   0  -4  -4  319.97   15.90
   0  -4  -4  319.77   13.40
   4   0  -4  349.87   14.50
   4   0  -4  316.27   14.30
   4   0  -4  293.17   15.10
  -4   4  -4  332.77   15.50
  -4   4  -4  350.96   17.40
   4  -4   4  328.17   14.50
  -4   0   4  317.77   13.50
   0   4   4  308.67   13.40
  -4   0   4  337.87   14.40
  -4   5  -4  708.83   29.60
  -1  -4  -4  684.63   30.90
  -4   5  -4  681.93   30.00
   5  -1  -4  705.73   27.50
   5  -1  -4  685.33   28.70
  -5   1   4  683.53   27.10
   1   4   4  656.53   28.70
  -5   1   4  724.63   29.20
   1   4   4  693.63   27.10
   4  -5   4  704.23   28.90
  -2  -4  -4  183.58   12.30
  -4   6  -4  182.18   14.00
   6  -2  -4  191.38   10.50
   6  -2  -4  191.78    9.80
  -4   6  -4  192.18   10.30
   4  -6   4  182.88    9.90
  -6   2   4  191.08   10.70
   2   4   4  182.88    8.90
  -6   2   4  181.48    8.80
   2   4   4  180.28   10.00
  -4   7  -4    6.90    7.60
  -4   7  -4    2.20    3.50
  -3  -4  -4   -0.60    4.30
   7  -3  -4   -3.50    3.70
   3   4   4    2.50    3.10
   3   4   4    1.10    2.20
   4  -7   4    4.60    2.80
   4  -7   4    1.90    2.50
  -7   3   4    2.30    2.40
  -7   3   4   -1.80    3.70
  -4   8  -4  400.36   24.10
  -4  -4  -4  372.46   22.10
  -4   8  -4  388.26   18.80
   8  -4  -4  412.26   18.50
   4   4   4  397.16   19.00
  -8   4   4  401.96   16.90
  -8   4   4  416.26   19.70
   4   4   4  409.86   17.20
   4  -8   4  394.06   17.10
  -4   9  -4   12.40    4.80
   9  -5  -4   16.90    5.20
  -4   9  -4   19.20   10.40
  -5  -4  -4   12.60    7.40
   5   4   4   12.20    4.00
   4  -9   4    9.70    4.40
   5   4   4   14.50    4.60
  -9   5   4   17.50    3.50
  -9   5   4    9.40    5.70
  -5  -3  -4    4.20    6.40
  -3   8  -4    1.50    3.90
  -3   8  -4   15.20    9.30
   8  -5  -4    1.20    4.40
  -3   8  -4    3.50    3.60
  -8   5   4   -3.50    2.60
   5   3   4   -0.70    3.50
  -8   5   4    0.20    4.10
   3  -8   4    2.80    3.50
   5   3   4    1.20    2.60
  -2   7  -4  174.38   10.60
  -5  -2  -4  188.48   14.00
  -2   7  -4  171.78    9.90
  -2   7  -4  191.78   16.30
   7  -5  -4  189.58   11.10
   5   2   4  180.38    9.00
   2  -7   4  182.48    9.80
  -7   5   4  190.08   11.30
   5   2   4  192.18   10.70
  -7   5   4  197.18    8.90
  -1   6  -4   54.79    5.80
   6  -5  -4   57.19    6.90
  -5  -1  -4   61.79    9.00
  -1   6  -4   56.69    8.80
  -1   6  -4   66.29    5.40
   5   1   4   52.59    4.30
   1  -6   4   46.30    5.20
  -6   5   4   44.80    4.20
  -6   5   4   57.79    6.40
   5   1   4   53.39    5.70
  -5   0  -4  350.56   18.60
   0   5  -4  365.46   15.90
   0   5  -4  338.37   17.90
  -5   0  -4  362.16   16.50
   5  -5  -4  356.56   15.70
   5   0   4  339.07   14.00
  -5   5   4  328.97   16.10
   5   0   4  327.67   15.80
   0  -5   4  354.06   15.00
   1   4  -4  666.73   28.90
  -5   1  -4  699.13   28.30
   1   4  -4  666.63   28.60
   4  -5  -4  670.23   27.00
  -5   1  -4  717.53   31.20
  -4   5   4  679.83   29.10
  -4   5   4  700.33   26.60
   5  -1   4  684.23   28.90
  -1  -4   4  675.63   27.10
   2   3  -4  243.48   11.50
  -5   2  -4  248.38   14.00
   3  -5  -4  237.08   11.50
   2   3  -4  240.78   13.40
  -5   2  -4  254.77   14.10
  -3   5   4  238.08   12.20
   5  -2   4  231.98   11.60
  -2  -3   4  238.68   10.90
  -3   5   4  238.38   10.40
   2  -5  -4  224.48   10.80
  -5   3  -4  242.18   14.30
  -5   3  -4  236.08   13.10
   3   2  -4  225.08   11.10
   3   2  -4  233.38   12.50
  -2   5   4  220.58   10.10
  -3  -2   4  230.08   10.50
   5  -3   4  228.48   11.00
  -5   4  -4  701.13   29.30
   4   1  -4  670.93   26.90
   1  -5  -4  652.13   25.90
   1  -5  -4  687.33   29.70
   4   1  -4  678.13   28.30
  -5   4  -4  674.33   29.70
   5  -4   4  686.43   28.30
  -1   5   4  633.54   26.30
  -4  -1   4  699.13   26.70
   0  -5  -4  326.07   14.30
  -5   5  -4  363.06   17.10
   5   0  -4  339.27   15.50
   0  -5  -4  335.67   17.30
  -5   5  -4  358.86   19.10
   5   0  -4  347.97   15.90
   0   5   4  333.67   14.60
   5  -5   4  352.46   15.80
  -5   0   4  363.26   14.80
  -5   0   4  370.36   16.10
  -1  -5  -4   66.29    8.10
   6  -1  -4   54.99    6.90
  -5   6  -4   48.30    7.10
  -5   6  -4   55.29    8.80
   6  -1  -4   52.99    6.10
  -6   1   4   52.49    6.80
   5  -6   4   54.79    5.50
   1   5   4   51.89    4.80
  -6   1   4   49.90    4.60
   1   5   4   63.79    6.30
  -5   7  -4  172.28   15.90
   7  -2  -4  197.18   11.30
  -5   7  -4  203.18   11.30
  -2  -5  -4  183.78   13.40
   7  -2  -4  201.38   10.90
   2   5   4  186.78    9.60
  -7   2   4  192.08    9.40
   2   5   4  195.08   11.10
  -7   2   4  191.28   11.70
   5  -7   4  199.38   10.60
  -5   8  -4    3.40    9.30
  -5   8  -4   -6.60    3.90
   8  -3  -4   -0.30    3.70
   8  -3  -4    2.40    4.30
  -3  -5  -4   -1.50    5.50
   5  -8   4   -5.50    3.80
  -8   3   4    2.50    2.70
   3   5   4    3.10    3.00
  -8   3   4   -6.40    4.70
   3   5   4    4.70    3.80
   9  -4  -4    4.90    4.40
  -5   9  -4   15.20    5.10
  -4  -5  -4   12.10    7.70
   9  -4  -4   19.90    5.60
  -5   9  -4   16.40   10.90
   5  -9   4   15.90    4.80
  -9   4   4   17.80    6.30
  -9   4   4    6.90    3.30
   4   5   4   18.80    4.20
   5  -9   4   16.20    4.10
   4   5   4    8.20    4.60
  -5  10  -4  158.18   12.00
  10  -5  -4  171.98   12.90
  -5  -5  -4  153.48   17.60
  -5  10  -4  190.48   23.30
   5   5   4  159.78   10.30
   5 -10   4  142.49   10.90
 -10   5   4  138.49    9.10
   5   5   4  149.88   12.40
 -10   5   4  163.58   13.80
   5 -10   4  171.78   10.80
  -6  -5  -4   65.89   11.50
  -5  11  -4   62.29    8.30
  11  -6  -4   62.09    9.10
  -5  11  -4   68.79   17.60
   6   5   4   40.30    8.00
 -11   6   4   71.29   10.00
   5 -11   4   65.79    9.90
   5 -11   4   69.39    9.00
 -11   6   4   67.49    7.00
   6   5   4   60.69    7.10
  -4  10  -4  396.06   28.70
  -6  -4  -4  416.36   25.60
  10  -6  -4  387.56   20.40
  -4  10  -4  387.06   19.50
 -10   6   4  390.76   21.60
 -10   6   4  360.76   17.10
   6   4   4  409.16   20.20
   6   4   4  426.26   18.30
   4 -10   4  414.56   18.90
  -6  -3  -4  601.14   31.40
  -3   9  -4  591.94   26.60
   9  -6  -4  601.04   26.40
  -3   9  -4  572.04   26.90
  -3   9  -4  657.23   32.60
  -9   6   4  581.74   28.10
  -9   6   4  596.34   24.20
   6   3   4  596.44   27.30
   3  -9   4  637.14   25.60
   6   3   4  601.34   24.80
  -2   8  -4  248.48   19.80
  -2   8  -4  251.07   13.20
  -2   8  -4  253.97   13.40
   8  -6  -4  252.17   14.00
  -6  -2  -4  243.68   17.80
   2  -8   4  249.48   12.70
  -8   6   4  246.58   14.70
  -8   6   4  245.08   11.30
   6   2   4  260.87   14.00
   6   2   4  248.98   11.70
   7  -6  -4   -1.60    4.10
  -1   7  -4   -4.60    7.80
  -1   7  -4    8.90    3.20
  -1   7  -4    6.70    3.60
  -6  -1  -4   13.30    6.30
   6   1   4    3.20    2.50
  -7   6   4    2.80    3.70
   1  -7   4    1.50    3.20
   6   1   4    1.00    3.20
  -7   6   4    0.20    2.30
   0   6  -4  239.88   16.20
  -6   0  -4  232.58   15.30
   0   6  -4  241.58   12.10
   6  -6  -4  233.38   12.50
  -6   6   4  232.48   10.60
   6   0   4  238.98   12.30
  -6   6   4  225.58   12.60
   0  -6   4  224.38   11.20
   6   0   4  232.28   10.30
   1   5  -4   43.00    5.80
  -6   1  -4   54.59    8.50
   1   5  -4   56.39    8.20
   5  -6  -4   43.00    6.40
  -6   1  -4   65.79    9.90
   6  -1   4   58.09    3.90
  -5   6   4   55.49    6.20
   6  -1   4   50.99    5.80
  -1  -5   4   56.69    5.30
  -5   6   4   52.69    4.30
  -6   2  -4  206.38   13.00
   2   4  -4  191.68   10.20
   2   4  -4  182.88   13.30
   4  -6  -4  177.38   10.20
  -6   2  -4  202.78   13.60
  -2  -4   4  170.58    9.30
  -4   6   4  194.88    8.80
  -4   6   4  171.48   10.30
   6  -2   4  184.98   10.10
  -6   3  -4 1929.51   72.59
   3  -6  -4 1891.31   70.19
  -6   3  -4 1960.40   78.99
   3   3  -4 1913.31   77.09
   3   3  -4 1962.70   71.19
  -3   6   4 1962.00   77.69
   6  -3   4 1828.12   77.19
  -3   6   4 1908.21   72.19
  -3  -3   4 1933.81   72.69
   4   2  -4  202.78   11.60
   4   2  -4  190.78   10.10
  -6   4  -4  184.08   13.60
  -6   4  -4  190.28   12.10
   2  -6  -4  178.38    9.90
  -2   6   4  180.78   10.70
  -2   6   4  163.88    8.70
  -4  -2   4  187.18    9.20
   6  -4   4  187.18    9.80
   1  -6  -4   46.30    5.70
  -6   5  -4   62.69    7.50
   5   1  -4   60.69    7.90
   5   1  -4   54.59    6.30
   1  -6  -4   60.99    7.70
  -6   5  -4   66.29    8.60
  -1   6   4   52.79    4.70
  -5  -1   4   48.90    4.70
   6  -5   4   59.19    5.50
   6   0  -4  239.58   12.20
   6   0  -4  242.88   12.60
  -6   6  -4  227.58   16.50
  -6   6  -4  248.08   13.60
   0  -6  -4  234.38   13.90
   0   6   4  219.48   11.60
   0   6   4  228.48   10.90
  -6   0   4  233.68   11.00
   6  -6   4  217.68   11.50
  -6   0   4  230.58   12.80
   7  -1  -4    8.10    4.20
  -6   7  -4    3.70    4.20
  -6   7  -4    2.80    8.40
  -1  -6  -4    0.90    4.70
   7  -1  -4    8.90    3.80
   6  -7   4    2.60    2.70
  -7   1   4    2.10    2.40
   1   6   4    4.20    2.80
  -7   1   4    5.40    4.70
   1   6   4   -3.20    3.20
  -6   8  -4  262.17   14.60
   8  -2  -4  272.77   13.90
  -2  -6  -4  254.47   17.40
   8  -2  -4  252.27   14.10
  -6   8  -4  258.57   20.70
   2   6   4  261.37   14.00
  -8   2   4  276.37   15.20
   6  -8   4  266.87   13.70
   2   6   4  244.08   12.60
  -8   2   4  249.88   12.20
   9  -3  -4  588.54   25.50
  -6   9  -4  540.15   26.90
  -3  -6  -4  575.94   30.30
   9  -3  -4  601.94   26.20
  -6   9  -4  574.84   32.20
   6  -9   4  605.44   26.20
  -9   3   4  582.74   24.10
  -9   3   4  618.64   27.90
   3   6   4  584.04   24.80
   3   6   4  607.54   26.80
  10  -4  -4  417.46   20.00
  -4  -6  -4  398.86   25.20
  -6  10  -4  395.56   20.90
  -6  10  -4  404.06   29.80
  10  -4  -4  384.76   19.70
   4   6   4  403.46   18.70
 -10   4   4  415.86   17.80
 -10   4   4  404.46   22.50
   6 -10   4  398.26   19.70
   4   6   4  401.56   20.40
   6 -10   4  404.66   17.90
  -6  11  -4   68.39   17.10
  11  -5  -4   67.79   10.80
  -5  -6  -4   57.29   12.90
  11  -5  -4   83.79   12.10
  -6  11  -4   79.69   11.50
   5   6   4   64.99    8.70
 -11   5   4   60.79    6.10
   6 -11   4   70.59    8.40
   5   6   4   48.10    7.50
   6 -11   4   69.39    9.30
 -11   5   4   57.89   10.20
  -6  12  -4  440.36   24.30
  -6  12  -4  447.26   36.80
  -6  -6  -4  496.55   30.20
  12  -6  -4  478.95   23.90
   6   6   4  453.55   21.40
 -12   6   4  467.35   26.00
 -12   6   4  465.15   20.20
   6 -12   4  450.05   21.60
   6 -12   4  451.25   23.30
   6   6   4  454.75   24.20
  -6  13  -4    6.00   19.60
  13  -7  -4   -5.20    8.00
  -7  -6  -4    6.60   14.40
  -6  13  -4   -1.10    8.40
   7   6   4    4.60    5.60
 -13   7   4   -3.40    9.70
   6 -13   4    4.70    8.00
   6 -13   4   12.40    7.30
 -13   7   4   19.70    5.00
   7   6   4    0.40    7.40
  12  -7  -4   -2.10    7.50
  -7  -5  -4   -7.50   11.50
  -5  12  -4  -10.30    7.10
  -5  12  -4  -22.10   18.20
   5 -12   4   -1.40    5.80
   7   5   4   12.10    5.00
 -12   7   4    3.30    8.30
 -12   7   4    3.20    4.40
   5 -12   4    3.60    6.30
   7   5   4  -14.20    6.60
  -4  11  -4  507.35   26.10
  -7  -4  -4  545.25   31.90
  11  -7  -4  556.64   26.10
  -4  11  -4  540.55   35.70
   4 -11   4  529.55   24.40
 -11   7   4  535.25   27.70
   7   4   4  554.14   23.40
 -11   7   4  531.85   22.40
   7   4   4  553.54   26.50
  -3  10  -4   -2.20   12.30
  -7  -3  -4   21.30    9.70
  -3  10  -4   13.00    5.50
  10  -7  -4   18.30    6.50
  -3  10  -4   12.70    5.20
 -10   7   4    3.80    6.70
 -10   7   4    7.30    3.60
   7   3   4   10.20    3.90
   7   3   4    5.40    5.00
   3 -10   4    4.60    5.30
  -2   9  -4    2.40    4.30
  -7  -2  -4   14.80    8.70
   9  -7  -4   -3.80    5.50
  -2   9  -4    0.70    4.50
  -2   9  -4  -10.70   11.00
  -9   7   4    4.00    3.40
  -9   7   4    1.00    5.50
   2  -9   4    2.50    4.70
   7   2   4    1.10    3.00
   7   2   4    4.30    4.60
  -7  -1  -4  724.03   35.30
  -1   8  -4  716.13   34.00
   8  -7  -4  723.83   30.00
  -1   8  -4  704.43   30.80
   7   1   4  751.52   28.20
  -8   7   4  695.03   32.20
   1  -8   4  658.43   30.90
  -8   7   4  772.52   28.30
   7   1   4  717.53   31.40
   1  -8   4  635.84   29.20
   0   7  -4  206.48   12.10
   7  -7  -4  216.78   13.10
  -7   0  -4  219.78   16.90
   0   7  -4  228.98   17.50
  -7   7   4  207.28   13.30
   0  -7   4  218.48   12.10
  -7   7   4  213.78   10.30
   0  -7   4  217.18   11.70
   7   0   4  217.28   12.50
   7   0   4  215.38   10.00
   1   6  -4   12.20    7.80
  -7   1  -4    1.40    6.00
  -7   1  -4    6.60    7.10
   6  -7  -4    3.30    4.10
   1   6  -4    3.70    3.20
  -1  -6   4    4.70    2.90
  -6   7   4    2.60    2.20
   7  -1   4    2.00    2.10
  -6   7   4    7.00    3.80
   7  -1   4    3.30    3.30
  -7   2  -4  185.58   15.10
   5  -7  -4  187.38   11.30
  -7   2  -4  191.58   13.90
   2   5  -4  201.08   15.40
   2   5  -4  197.88   11.10
   7  -2   4  180.48   10.70
  -2  -5   4  190.18   10.10
  -5   7   4  190.38   11.00
  -5   7   4  195.38    9.30
   3   4  -4   10.90    6.30
  -7   3  -4   11.20    4.90
  -7   3  -4    5.20    7.20
   3   4  -4    0.60    3.40
   4  -7  -4   -2.00    3.60
  -4   7   4    7.40    3.50
   7  -3   4    1.90    2.70
  -3  -4   4    3.70    2.90
  -4   7   4    0.40    2.20
   4   3  -4    4.90    3.50
  -7   4  -4    0.10    7.90
  -7   4  -4    4.30    4.40
   4   3  -4    5.50    5.80
   3  -7  -4   -1.70    3.60
  -3   7   4    2.20    4.00
   7  -4   4    1.80    2.60
  -3   7   4   -1.00    2.30
  -4  -3   4    5.30    2.80
   2  -7  -4  172.28   12.30
   5   2  -4  199.08   10.90
   2  -7  -4  184.18   10.70
  -7   5  -4  192.28   16.50
   5   2  -4  205.48   12.50
  -7   5  -4  202.98   12.90
  -2   7   4  195.68    9.60
   7  -5   4  194.28   10.60
  -5  -2   4  191.48    9.80
  -7   6  -4    5.20    7.90
  -7   6  -4    6.90    4.30
   1  -7  -4    5.30    4.90
   1  -7  -4    0.40    3.30
   6   1  -4    2.90    5.20
   6   1  -4   -0.20    3.70
  -6  -1   4    1.50    2.60
  -6  -1   4    0.70    4.10
   7  -6   4    3.60    2.90
  -1   7   4    6.00    2.80
   7   0  -4  227.58   12.50
  -7   7  -4  232.08   13.80
  -7   7  -4  200.08   19.80
   0  -7  -4  230.68   14.80
   7   0  -4  226.78   12.70
  -7   0   4  232.38   13.50
   7  -7   4  207.08   11.80
   0   7   4  212.58   11.10
  -7   0   4  185.28   10.70
   0   7   4  221.38   11.70
   8  -1  -4  788.62   32.30
   8  -1  -4  787.52   30.50
  -1  -7  -4  710.43   35.00
  -7   8  -4  729.23   33.30
  -7   8  -4  713.03   36.30
  -8   1   4  783.02   33.40
  -8   1   4  722.43   29.70
   1   7   4  692.83   29.80
   7  -8   4  728.63   31.80
   1   7   4  744.33   31.90
   9  -2  -4   -4.50    4.70
   9  -2  -4    3.80    5.50
  -7   9  -4   10.60    6.10
  -2  -7  -4   -4.10    6.50
  -7   9  -4    4.90   11.60
  -9   2   4    1.80    3.50
   2   7   4    5.90    4.90
  -9   2   4   -1.10    6.00
   7  -9   4    2.20    4.10
   2   7   4    7.10    3.80
  -3  -7  -4   11.90    7.80
  -7  10  -4   12.20    6.40
  -7  10  -4    2.70   12.70
  10  -3  -4   16.60    5.40
  10  -3  -4    7.80    6.20
   3   7   4    6.30    5.30
 -10   3   4    8.60    4.00
 -10   3   4   17.50    7.40
   3   7   4    7.40    4.30
   7 -10   4    7.40    5.10
  11  -4  -4  542.25   25.80
  -7  11  -4  565.84   27.50
  -7  11  -4  514.45   35.60
  -4  -7  -4  527.75   32.00
  11  -4  -4  550.84   25.70
   4   7   4  542.35   26.30
   7 -11   4  559.64   25.90
 -11   4   4  561.44   28.60
 -11   4   4  567.34   23.40
   4   7   4  544.85   24.60
  12  -5  -4    6.70    6.10
  -7  12  -4  -10.40    7.30
  -5  -7  -4  -10.80   10.10
  -7  12  -4   18.20   17.20
  12  -5  -4    4.00    8.00
 -12   5   4  -10.50    9.20
   7 -12   4    4.10    5.90
   5   7   4    5.70    6.80
  -6  -7  -4   23.00   13.10
  -7  13  -4    0.00   18.40
  13  -6  -4    9.40    8.90
  13  -6  -4    3.90    7.30
  -7  13  -4   -9.70    8.50
 -13   6   4    7.70    9.90
   6   7   4    9.90    5.70
 -13   6   4   -1.70    5.20
   7 -13   4   20.40    7.80
   6   7   4    5.90    7.50
   7 -13   4    1.60    6.60
  -7  14  -4  393.56   24.80
  14  -7  -4  442.56   25.10
  -7  -7  -4  379.36   33.60
  -7  14  -4  348.17   40.60
 -14   7   4  354.16   26.20
 -14   7   4  413.56   18.70
   7 -14   4  367.96   23.40
   7   7   4  353.46   24.00
   7   7   4  408.06   20.50
  15  -8  -4   16.10   12.50
  -8  -7  -4   35.60   18.10
  -8  -7  -4   -5.10   11.50
 -15   8   4   23.40   12.60
   7 -15   4   -3.20   10.30
  14  -8  -4  334.17   23.40
  -6  14  -4  266.97   22.90
  -8  -6  -4  300.77   21.30
  -6  14  -4  308.27   33.40
  -8  -6  -4  380.86   31.90
   6 -14   4  272.47   20.40
 -14   8   4  332.17   23.80
   8   6   4  322.87   20.80
 -14   8   4  317.37   16.30
   6 -14   4  286.57   19.60
  13  -8  -4  401.96   23.90
  -8  -5  -4  482.45   32.20
  -5  13  -4  375.16   23.70
  -5  13  -4  442.26   39.30
   5 -13   4  383.66   21.30
 -13   8   4  404.46   18.60
   8   5   4  371.36   23.10
 -13   8   4  374.76   24.40
   8   5   4  403.96   19.80
  12  -8  -4  434.76   24.30
  -4  12  -4  411.66   23.40
  -4  12  -4  429.16   35.70
  -8  -4  -4  483.05   31.10
 -12   8   4  447.86   19.30
   8   4   4  419.76   23.80
   8   4   4  447.06   20.20
   4 -12   4  406.06   21.50
 -12   8   4  395.56   24.60
  -8  -3  -4    3.30   10.40
  -3  11  -4    7.70    5.40
  -3  11  -4   27.20   16.50
  11  -8  -4   -1.70    7.20
  -3  11  -4    1.80    6.60
   8   3   4   -6.20    4.30
 -11   8   4   -3.70    7.50
 -11   8   4    5.50    4.20
   3 -11   4    1.60    6.20
   8   3   4   -0.70    5.70
  -2  10  -4  387.96   19.60
  -2  10  -4  404.36   28.20
  10  -8  -4  384.66   21.00
  -8  -2  -4  414.06   26.50
   8   2   4  397.86   17.70
 -10   8   4  384.06   17.30
   2 -10   4  364.76   20.80
   8   2   4  400.06   20.60
   2 -10   4  384.86   19.30
 -10   8   4  404.66   21.80
  -1   9  -4    5.20   11.30
  -1   9  -4   10.00    5.00
   9  -8  -4   -0.80    5.70
  -8  -1  -4   -2.30    8.40
   8   1   4    5.10    4.70
   1  -9   4   14.80    6.20
  -9   8   4    6.80    3.40
   8   1   4    6.00    3.50
  -9   8   4   -4.20    6.10
   1  -9   4    4.30    4.80
  -8   0  -4  240.18   18.50
   0   8  -4  238.28   20.70
   8  -8  -4  219.78   14.30
   0   8  -4  218.38   13.20
  -8   8   4  236.98   11.00
   0  -8   4  223.78   12.90
   8   0   4  239.78   14.10
   0  -8   4  213.48   13.60
  -8   8   4  229.68   14.80
  -8   1  -4  735.33   28.60
   1   7  -4  700.93   31.10
   1   7  -4  721.13   33.20
   7  -8  -4  719.43   30.20
  -8   1  -4  723.03   35.30
  -7   8   4  777.72   28.70
   8  -1   4  716.43   31.60
  -7   8   4  693.43   32.10
  -1  -7   4  710.63   29.80
   8  -1   4  683.03   28.00
  -8   2  -4  256.17   18.20
   2   6  -4  261.77   18.10
   2   6  -4  249.48   13.60
  -8   2  -4  234.88   17.80
   6  -8  -4  238.18   14.00
  -6   8   4  244.68   14.80
  -2  -6   4  238.28   12.90
  -6   8   4  276.87   11.80
   8  -2   4  238.48   13.40
  -8   3  -4   12.10    8.50
   3   5  -4  -10.00    7.50
   3   5  -4    4.60    3.70
  -8   3  -4   -3.60    5.80
   5  -8  -4    4.30    4.20
  -3  -5   4   -2.50    3.20
  -5   8   4    3.40    2.70
  -5   8   4    5.20    4.30
   8  -3   4    2.70    3.30
  -8   4  -4  435.26   23.80
   4   4  -4  412.06   20.80
  -8   4  -4  404.86   22.50
   4   4  -4  405.56   19.00
   4  -8  -4  389.46   18.40
   8  -4   4  401.76   19.10
  -4   8   4  384.06   20.10
  -4  -4   4  393.66   18.00
  -4   8   4  416.26   17.30
  -8   5  -4    4.20    5.30
   3  -8  -4    4.80    4.40
  -8   5  -4    2.60    9.20
   5   3  -4    6.20    6.30
   5   3  -4    5.40    3.80
  -5  -3   4    3.10    3.30
  -3   8   4   -7.70    4.60
  -3   8   4   -0.10    2.70
   8  -5   4   -1.20    3.10
  -8   6  -4  268.07   21.90
   2  -8  -4  248.78   13.00
   6   2  -4  260.17   15.10
   6   2  -4  246.78   13.90
  -8   6  -4  256.07   16.60
   2  -8  -4  236.38   15.70
  -6  -2   4  242.58   15.00
   8  -6   4  263.07   13.30
  -6  -2   4  260.77   12.50
  -2   8   4  239.08   12.10
  -8   7  -4  750.32   36.50
  -8   7  -4  756.92   33.90
   7   1  -4  760.82   30.20
   1  -8  -4  698.33   33.80
   7   1  -4  734.53   31.50
   1  -8  -4  704.73   28.40
  -7  -1   4  732.33   32.30
  -7  -1   4  689.03   29.30
  -1   8   4  707.53   29.20
   8  -7   4  700.43   31.20
   0  -8  -4  235.48   16.70
   8   0  -4  244.68   14.00
  -8   8  -4  271.87   16.40
  -8   8  -4  227.38   23.20
   8   0  -4  270.77   14.80
  -8   0   4  235.58   12.40
   8  -8   4  241.38   13.40
   0   8   4  226.98   13.40
  -8   0   4  262.17   15.90
   0   8   4  231.28   12.60
  -1  -8  -4    5.80    7.60
   9  -1  -4    1.40    5.10
  -8   9  -4   14.30    6.70
   9  -1  -4   10.00    6.20
  -8   9  -4    0.30   11.90
  -9   1   4   13.30    7.10
   1   8   4    9.60    5.00
   1   8   4    6.70    4.00
  -9   1   4   12.80    4.10
   8  -9   4   11.00    4.00
  -2  -8  -4  390.06   24.60
  -8  10  -4  405.86   21.50
  10  -2  -4  402.56   20.00
  10  -2  -4  380.56   20.10
  -8  10  -4  368.86   29.80
 -10   2   4  398.36   22.50
   2   8   4  380.06   19.60
   8 -10   4  393.46   19.50
   2   8   4  380.06   18.70
 -10   2   4  390.76   17.90
  -3  -8  -4   -5.10    9.10
  11  -3  -4    2.40    6.20
  -8  11  -4  -10.40    7.10
  11  -3  -4   16.20    7.60
  -8  11  -4    7.60   14.80
   8 -11   4   -1.90    5.30
 -11   3   4    7.40    4.60
   3   8   4   -4.20    4.90
   3   8   4   -9.80    5.70
 -11   3   4    7.10    8.40
  12  -4  -4  448.66   23.70
  12  -4  -4  458.65   22.70
  -4  -8  -4  451.55   29.70
  -8  12  -4  437.76   24.40
  -8  12  -4  359.56   33.70
 -12   4   4  453.05   25.90
 -12   4   4  447.16   20.10
   4   8   4  453.35   21.40
   8 -12   4  421.56   22.10
   4   8   4  411.76   22.80
  -5  -8  -4  399.16   30.00
  -8  13  -4  339.67   36.00
  -8  13  -4  380.66   23.20
  13  -5  -4  392.36   23.30
  13  -5  -4  410.36   21.80
 -13   5   4  365.36   25.60
   5   8   4  331.27   21.80
   8 -13   4  407.66   21.60
 -13   5   4  397.46   18.50
   5   8   4  375.16   19.90
  -8  14  -4  317.77   38.80
  -8  14  -4  302.27   22.20
  14  -6  -4  329.67   23.00
  14  -6  -4  320.27   20.60
  -6  -8  -4  357.36   30.70
 -14   6   4  284.77   24.10
   6   8   4  280.57   20.30
 -14   6   4  295.47   16.40
   8 -14   4  267.47   20.30
   6   8   4  328.57   18.10
  15  -7  -4    9.50   12.30
  -7  -8  -4  -12.30   18.40
  -8  15  -4    6.30   11.30
   8 -15   4   -3.70   10.10
 -15   7   4   -1.60   12.40
   7   8   4   -8.00    9.40
  -9  -6  -4   53.69   12.10
  -9  -6  -4   58.19   20.80
  15  -9  -4   60.69   13.80
  -6  15  -4   58.39   13.70
 -15   9   4   51.69   13.40
   6 -15   4   39.20   11.90
   9   6   4   61.49   11.20
   6 -15   4   88.89   12.10
  -5  14  -4   -7.20   25.90
  -9  -5  -4   18.80   17.90
  -9  -5  -4   26.50   10.10
  -5  14  -4   13.00   11.00
  14  -9  -4    4.50   10.60
   5 -14   4   13.90    8.60
   5 -14   4   18.10    8.30
   9   5   4   14.70    8.90
 -14   9   4    9.20   11.40
  13  -9  -4  -16.60    9.40
  -9  -4  -4    4.70    8.40
  -4  13  -4   10.20   21.50
  -9  -4  -4    7.10   14.80
   4 -13   4    4.30    7.80
 -13   9   4    0.60    5.40
   9   4   4  -17.20    8.40
 -13   9   4    0.00    9.30
  12  -9  -4  281.87   19.40
  -3  12  -4  255.57   16.80
  -9  -3  -4  271.77   17.20
  -3  12  -4  280.57   33.60
  -9  -3  -4  235.98   26.20
   3 -12   4  253.27   16.80
 -12   9   4  255.07   18.80
   9   3   4  281.17   18.30
   3 -12   4  266.37   19.90
  -9  -2  -4   -8.40   10.90
  -9  -2  -4    4.00    6.40
  -2  11  -4    7.80    6.00
  -2  11  -4   35.60   16.80
   2 -11   4  -12.30    8.00
   9   2   4    0.30    5.80
 -11   9   4    1.20    4.50
 -11   9   4   -6.10    7.50
   2 -11   4    5.40    6.20
  10  -9  -4    7.80    6.80
  -1  10  -4   35.70   13.20
  -9  -1  -4   13.70   10.00
  -1  10  -4    6.90    5.80
  -9  -1  -4   18.60    5.60
 -10   9   4   12.10    7.20
   9   1   4   11.40    5.70
   1 -10   4   20.20    7.60
 -10   9   4   19.90    4.00
   1 -10   4   17.50    6.00
  -9   0  -4  398.86   17.70
  -9   0  -4  394.56   25.70
   9  -9  -4  396.96   20.60
   0   9  -4  390.46   19.40
   0   9  -4  341.47   25.80
   0  -9   4  386.36   19.00
  -9   9   4  379.26   16.80
   0  -9   4  340.07   20.30
   9   0   4  386.56   20.00
  -9   9   4  374.06   20.90
   1   8  -4   10.40    4.90
  -9   1  -4    7.10    4.20
  -9   1  -4    4.80    8.70
   8  -9  -4   -5.70    5.80
   1   8  -4   15.80   11.40
  -8   9   4    9.20    3.50
  -1  -8   4   13.80    5.10
   9  -1   4    8.60    5.10
   9  -1   4   -0.80    4.60
  -1  -8   4    9.20    6.30
  -8   9   4    5.90    5.90
  -9   2  -4   10.40    7.10
   2   7  -4  -12.80    9.40
   2   7  -4    0.60    5.00
   7  -9  -4  -10.70    5.20
   9  -2   4    5.60    4.80
  -2  -7   4   -5.30    5.40
   9  -2   4    4.30    4.50
  -7   9   4   -9.80    5.50
  -7   9   4    5.60    3.10
  -2  -7   4    3.80    4.30
   3   6  -4  608.04   26.80
  -9   3  -4  571.84   30.60
   3   6  -4  578.54   28.20
   6  -9  -4  596.14   26.00
  -6   9   4  590.84   24.30
  -6   9   4  620.04   28.10
  -3  -6   4  585.84   25.50
   9  -3   4  577.34   26.60
   9  -3   4  591.84   25.00
   5  -9  -4   10.80    5.50
   4   5  -4   13.40    4.70
   4   5  -4    8.10    8.80
  -9   4  -4   15.80    7.90
  -9   4  -4    4.50    9.70
   9  -4   4   15.30    4.10
  -5   9   4    1.80    5.10
  -5   9   4   12.20    3.40
  -4  -5   4   15.40    4.20
  -9   5  -4    1.50   11.40
   4  -9  -4   12.90    5.60
  -9   5  -4   19.70    7.30
   5   4  -4   17.50    4.80
   5   4  -4   19.10    8.50
  -5  -4   4   12.60    4.40
   9  -5   4   10.90    4.40
  -4   9   4   26.20    5.90
  -5  -4   4   13.30    6.10
  -4   9   4   13.30    3.70
  -9   6  -4  561.24   31.40
   3  -9  -4  614.24   24.80
   3  -9  -4  551.84   28.00
   6   3  -4  578.54   26.10
  -9   6  -4  579.44   29.00
   6   3  -4  566.94   26.00
  -6  -3   4  574.44   27.20
  -3   9   4  579.54   24.00
  -6  -3   4  565.14   24.30
   9  -6   4  578.54   25.90
   2  -9  -4    0.50    5.10
  -9   7  -4   10.90    6.60
   7   2  -4    7.00    4.90
   7   2  -4    7.30    6.60
  -9   7  -4   -0.60   12.40
   2  -9  -4    0.10    6.60
  -7  -2   4    6.20    6.60
  -7  -2   4    6.00    3.80
   9  -7   4   -0.20    3.70
  -2   9   4    8.70    3.60
   1  -9  -4    1.80    6.80
  -9   8  -4   13.30   13.00
   1  -9  -4   16.90    4.80
   8   1  -4    6.00    5.00
   8   1  -4   11.90    7.20
  -9   8  -4    2.90    6.80
  -1   9   4    6.80    4.00
  -8  -1   4   11.10    4.30
  -8  -1   4    1.20    6.70
   9  -8   4    8.10    4.60
   9   0  -4  368.76   20.00
  -9   9  -4  391.06   22.00
   9   0  -4  382.06   19.60
  -9   9  -4  358.96   28.80
   0  -9  -4  363.06   22.90
  -9   0   4  407.56   18.00
  -9   0   4  415.96   22.10
   0   9   4  353.26   18.70
   9  -9   4  379.66   19.20
  -9  10  -4    8.70   13.70
  10  -1  -4   31.70    7.30
  10  -1  -4    8.00    6.20
  -9  10  -4   22.60    8.20
  -1  -9  -4   16.00    9.20
 -10   1   4   16.70    4.60
   9 -10   4   16.60    5.20
   1   9   4   18.70    5.20
 -10   1   4   13.70    9.10
   1   9   4    6.40    5.40
  -9  11  -4  -13.30   14.80
  -9  11  -4   -3.80    7.70
  -2  -9  -4   -9.10    9.80
  11  -2  -4   -1.10    7.80
   2   9   4   12.50    6.20
   9 -11   4    2.40    5.30
   2   9   4    3.70    5.10
 -11   2   4    3.90    8.80
 -11   2   4   -5.60    5.00
  -9  12  -4  226.88   30.10
  -3  -9  -4  259.27   23.50
  12  -3  -4  248.48   17.60
  -9  12  -4  231.88   19.00
  12  -3  -4  265.77   18.70
   3   9   4  245.48   17.00
   9 -12   4  283.77   16.20
   3   9   4  254.57   16.00
 -12   3   4  273.77   21.00
 -12   3   4  277.87   14.70
  -9  13  -4   32.30   18.60
  -9  13  -4   12.60    9.40
  13  -4  -4   11.10    9.40
  13  -4  -4   -5.80    7.70
  -4  -9  -4  -12.20   13.00
   9 -13   4   -3.50    7.20
   4   9   4    4.50    7.40
 -13   4   4    2.40   10.90
 -13   4   4   -8.80    5.80
  -9  14  -4   13.30   10.50
  14  -5  -4   16.50   11.60
  14  -5  -4   22.60    9.40
  -5  -9  -4    4.20   15.60
 -14   5   4   19.80   12.60
   9 -14   4   -5.80    8.50
   5   9   4   22.10    7.70
   5   9   4   17.70    8.50
  -6  -9  -4  104.79   20.10
  15  -6  -4   59.49   11.70
  -9  15  -4   65.69   13.10
  15  -6  -4   69.19   14.60
   9 -15   4   35.80   13.80
   6   9   4   55.79   10.90
   6   9   4   55.99    9.60
 -15   6   4   64.09   14.60
   9 -15   4   52.09   10.60
  -5  15  -4   70.69   28.20
 -10  -5  -4    2.00   11.20
  15 -10  -4   -2.30   12.10
  10   5   4    8.00   10.20
   5 -15   4   19.60   14.80
 -15  10   4  -11.40   11.80
   5 -15   4   23.60    9.90
  -4  14  -4  256.77   32.70
 -10  -4  -4  299.47   19.60
 -10  -4  -4  260.17   31.70
  14 -10  -4  259.67   23.70
   4 -14   4  229.88   24.40
   4 -14   4  277.67   19.10
  10   4   4  217.88   20.90
 -14  10   4  253.87   22.10
  -3  13  -4   23.50   22.60
  13 -10  -4   13.60   10.00
 -10  -3  -4   11.10   14.40
  -3  13  -4   31.20    8.10
 -10  -3  -4    5.70    8.90
   3 -13   4   17.30   11.70
 -13  10   4   32.30    5.90
 -13  10   4   14.70    9.80
  10   3   4   18.50    8.60
   3 -13   4   13.50    8.30
 -10  -2  -4  344.57   18.50
  -2  12  -4  321.27   18.90
 -10  -2  -4  374.36   28.40
  12 -10  -4  301.27   21.70
  -2  12  -4  297.17   35.00
   2 -12   4  315.37   19.30
 -12  10   4  273.37   21.90
   2 -12   4  311.67   22.10
 -12  10   4  315.67   16.00
  10   2   4  341.37   20.50
 -10  -1  -4  265.67   25.40
  -1  11  -4  229.48   16.20
  -1  11  -4  293.17   29.10
 -10  -1  -4  255.47   15.10
  11 -10  -4  229.18   18.60
   1 -11   4  256.57   16.20
 -11  10   4  244.58   19.10
   1 -11   4  256.17   18.50
  10   1   4  258.37   17.00
 -11  10   4  257.87   13.30
   0  10  -4  338.67   19.10
  10 -10  -4  326.27   20.50
   0  10  -4  379.66   27.60
 -10   0  -4  369.86   16.90
 -10   0  -4  311.17   26.60
   0 -10   4  356.26   18.60
   0 -10   4  351.26   21.50
 -10  10   4  354.06   20.90
  10   0   4  336.97   19.80
 -10  10   4  325.17   16.10
   1   9  -4    3.40    5.80
 -10   1  -4   29.90   10.90
   9 -10  -4    2.60    6.80
   1   9  -4   -3.60   12.20
 -10   1  -4   11.40    4.80
  -1  -9   4   21.10    6.10
  -1  -9   4   19.60    8.00
  10  -1   4   14.60    5.60
  -9  10   4   14.00    4.30
  -9  10   4    7.60    6.60
   8 -10  -4  387.16   20.80
   2   8  -4  394.56   20.00
   2   8  -4  420.26   26.40
 -10   2  -4  410.46   26.10
  10  -2   4  388.66   20.50
  -8  10   4  368.56   21.60
  -2  -8   4  381.06   19.10
  10  -2   4  393.86   18.40
  -2  -8   4  368.16   21.40
  -8  10   4  396.76   17.50
   3   7  -4    5.70    5.60
   3   7  -4    8.70   11.00
   7 -10  -4    3.40    6.20
 -10   3  -4   13.60    8.40
  -3  -7   4    2.80    7.30
  10  -3   4    8.70    5.00
  -3  -7   4   -1.00    4.90
  10  -3   4   11.50    5.80
  -7  10   4   14.60    3.90
  -7  10   4   17.70    6.30
 -10   4  -4  405.76   24.50
   4   6  -4  403.16   19.90
   6 -10  -4  397.26   20.30
  -4  -6   4  376.96   18.80
  -6  10   4  407.66   17.80
  -4  -6   4  345.67   20.60
  10  -4   4  397.66   20.00
  10  -4   4  420.16   19.20
  -6  10   4  409.06   21.50
 -10   5  -4  164.58   16.40
   5   5  -4  160.38   11.90
   5   5  -4  134.39   17.40
   5 -10  -4  171.78   12.90
  -5  10   4  153.88   13.20
  -5  -5   4  163.08   10.80
  -5  -5   4  150.68   13.80
  -5  10   4  163.68    9.80
  10  -5   4  170.38   11.50
  10  -5   4  157.18   12.80
   6   4  -4  408.56   20.10
 -10   6  -4  381.96   23.40
   4 -10  -4  404.76   19.70
   6   4  -4  418.46   22.60
  -6  -4   4  381.16   18.70
  -6  -4   4  398.06   21.90
  10  -6   4  404.86   20.10
  -4  10   4  407.56   18.20
  -4  10   4  390.06   21.70
   3 -10  -4    5.70    6.00
   7   3  -4    8.70    5.60
 -10   7  -4   31.90   13.10
   3 -10  -4    6.80    7.30
   7   3  -4   13.80    8.60
 -10   7  -4   -2.90    7.20
  -3  10   4   13.30    4.20
  10  -7   4    8.00    5.00
  -7  -3   4    4.90    4.20
  -7  -3   4   16.20    7.30
   8   2  -4  401.66   20.40
   2 -10  -4  397.16   23.30
   8   2  -4  415.16   21.70
 -10   8  -4  381.26   23.20
   2 -10  -4  391.36   19.00
 -10   8  -4  399.06   28.90
  -2  10   4  383.56   18.50
  10  -8   4  404.76   20.00
  -8  -2   4  384.56   18.60
  -8  -2   4  385.86   22.30
 -10   9  -4   32.00   12.60
   9   1  -4    6.40    5.50
   1 -10  -4   16.60    8.50
 -10   9  -4   16.90    8.10
   9   1  -4    8.90    8.30
  -1  10   4   24.50    5.20
  -9  -1   4   14.40    8.50
  -9  -1   4   10.40    5.10
  10  -9   4   15.60    5.40
   0 -10  -4  320.47   23.80
  10   0  -4  363.76   21.00
 -10  10  -4  387.96   29.60
  10   0  -4  355.86   19.20
 -10  10  -4  364.06   21.80
 -10   0   4  358.96   22.70
   0  10   4  340.77   18.00
  10 -10   4  355.36   18.50
   0  10   4  334.07   17.90
 -10   0   4  338.97   17.30
  11  -1  -4  306.97   19.10
  11  -1  -4  257.57   16.60
 -10  11  -4  286.97   29.10
 -10  11  -4  253.77   18.70
  -1 -10  -4  233.58   21.70
   1  10   4  248.08   15.60
 -11   1   4  222.98   21.00
  10 -11   4  253.27   15.80
 -11   1   4  267.27   14.40
   1  10   4  244.78   15.10
  -2 -10  -4  324.97   26.30
  12  -2  -4  352.06   21.10
 -10  12  -4  331.17   32.90
 -10  12  -4  311.87   21.50
  12  -2  -4  269.97   19.40
   2  10   4  322.27   18.50
  10 -12   4  337.57   19.00
   2  10   4  308.67   18.10
 -12   2   4  326.27   17.20
 -12   2   4  300.67   23.20
  -3 -10  -4   13.20   13.00
  13  -3  -4   -1.10    8.50
  13  -3  -4    5.30   10.50
 -10  13  -4    4.10    9.60
 -13   3   4   15.10   11.20
   3  10   4    4.70    6.60
  10 -13   4   24.00    7.50
   3  10   4   16.10    8.20
 -13   3   4   27.20    7.00
  14  -4  -4  200.48   20.20
  14  -4  -4  284.07   22.30
  -4 -10  -4  286.27   30.00
 -10  14  -4  287.07   21.50
   4  10   4  225.98   18.70
   4  10   4  236.58   17.20
  10 -14   4  298.77   19.20
  10 -14   4  272.27   23.00
 -14   4   4  267.97   16.20
 -14   4   4  274.37   24.50
  15  -5  -4   10.60   13.50
 -10  15  -4  -14.10   11.60
  -5 -10  -4   -3.10   18.50
 -15   5   4   -5.60    7.80
   5  10   4  -18.60    9.30
  10 -15   4   11.80   12.50
   5  10   4    7.50    8.10
 -15   5   4  -16.10   14.20
  14 -11  -4  -11.30   11.10
  -3  14  -4    0.00    8.50
 -11  -3  -4   -6.50    9.80
  -3  14  -4  -16.00   25.60
 -11  -3  -4    2.00   16.80
   3 -14   4   13.30    9.40
 -14  11   4  -17.50   11.30
  11   3   4  -13.00    9.90
 -11  -2  -4  477.25   22.90
  13 -11  -4  414.86   26.90
  -2  13  -4  416.16   23.90
  -2  13  -4  453.15   42.20
 -11  -2  -4  416.46   34.90
 -13  11   4  357.86   26.40
  11   2   4  457.55   25.60
   2 -13   4  454.95   23.90
   2 -13   4  444.96   27.40
 -11  -1  -4    5.50    7.00
  -1  12  -4  -13.70    6.80
 -11  -1  -4  -17.60   14.40
  12 -11  -4   -6.10    9.30
  -1  12  -4   19.50   20.30
   1 -12   4    1.60   10.70
 -12  11   4   -3.70    5.10
   1 -12   4    7.50    7.70
 -12  11   4    2.90    8.70
  11   1   4    7.40    7.80
 -11   0  -4   97.89   11.50
  11 -11  -4  102.29   12.60
 -11   0  -4  110.49   16.90
   0  11  -4  109.99   19.10
   0  11  -4  108.19   12.90
  11   0   4  106.89   13.80
 -11  11   4  109.39    9.70
   0 -11   4   95.29   12.60
 -11  11   4  140.09   14.90
   0 -11   4  122.39   13.20
   1  10  -4  319.17   27.00
  10 -11  -4  239.48   18.70
 -11   1  -4  284.97   24.20
   1  10  -4  240.78   16.50
 -11   1  -4  252.97   13.90
  11  -1   4  230.28   17.30
 -10  11   4  250.57   18.20
 -10  11   4  249.58   13.50
  -1 -10   4  252.87   16.30
  -1 -10   4  253.07   20.00
 -11   2  -4  -12.50   10.20
   2   9  -4    4.50    6.20
   2   9  -4  -13.00   13.40
  -2  -9   4   -5.50    9.10
  11  -2   4    1.00    6.30
  11  -2   4   -4.30    5.60
  -2  -9   4   -1.50    5.60
  -9  11   4    0.20    4.30
   3   8  -4    0.90   12.60
   3   8  -4   -2.10    6.30
   8 -11  -4   -7.30    7.20
 -11   3  -4   -0.30   10.00
  -3  -8   4   -2.00    5.50
  11  -3   4   -0.20    5.70
  -8  11   4    0.20    4.10
  -3  -8   4    2.60    8.50
  11  -3   4   -2.10    5.50
  -8  11   4    3.60    6.80
   7 -11  -4  560.94   26.30
   4   7  -4  552.74   25.90
 -11   4  -4  523.45   30.50
  -4  -7   4  529.15   27.50
  11  -4   4  529.95   26.10
  -7  11   4  533.15   23.30
  -7  11   4  546.15   27.40
  11  -4   4  553.84   24.40
  -4  -7   4  518.75   24.50
   5   6  -4   71.79   10.50
   6 -11  -4   59.89    9.20
   5   6  -4   27.80   11.50
 -11   5  -4   73.69   12.00
  11  -5   4   63.19    8.70
  11  -5   4   74.79   10.10
  -5  -6   4   59.09    9.30
  -5  -6   4   71.29    9.10
  -6  11   4   57.49    9.50
  -6  11   4   60.29    7.90
   6   5  -4   70.89   10.20
   6   5  -4   30.20   11.80
   5 -11  -4   50.59    8.50
 -11   6  -4   48.90   10.40
  -6  -5   4   50.69    9.70
  -5  11   4   75.09    8.10
  11  -6   4   79.19   11.80
  -5  11   4   59.89    9.50
  11  -6   4   80.99    9.90
  -6  -5   4   56.89    7.40
 -11   7  -4  537.95   30.00
   7   4  -4  529.05   28.00
   7   4  -4  551.84   25.80
   4 -11  -4  574.24   25.30
   4 -11  -4  546.45   28.50
  -7  -4   4  487.25   28.10
  11  -7   4  549.05   25.80
  11  -7   4  563.54   25.80
  -4  11   4  551.84   23.80
  -7  -4   4  519.75   24.10
   8   3  -4  -10.00    5.70
   3 -11  -4   -5.20    6.30
   3 -11  -4   -2.30    8.50
 -11   8  -4   -8.50    8.70
   8   3  -4   -4.40    9.70
  -8  -3   4    4.30    8.70
  -8  -3   4    4.80    5.10
  11  -8   4   -1.90    5.30
  -3  11   4    6.30    4.70
  11  -8   4    1.90    7.30
   2 -11  -4   -0.60    7.10
   9   2  -4  -10.90    6.10
   9   2  -4    6.40    9.40
   2 -11  -4  -11.50    8.40
 -11   9  -4    6.50    8.10
  11  -9   4   -1.20    5.30
  -2  11   4    2.70    4.90
  -9  -2   4   10.90    9.40
  -9  -2   4    1.70    5.20
  11  -9   4   -4.70    7.40
 -11  10  -4  245.58   19.60
   1 -11  -4  244.18   20.50
  10   1  -4  248.48   19.90
  10   1  -4  239.58   16.40
  11 -10   4  246.98   18.10
  -1  11   4  251.07   15.20
  11 -10   4  237.48   16.00
 -10  -1   4  245.48   20.40
 -10  -1   4  256.47   14.40
  11   0  -4   99.69   13.10
  11   0  -4  110.49   12.70
 -11  11  -4  102.09   15.90
   0 -11  -4   91.59   14.50
  11 -11   4   97.79   12.70
   0  11   4  101.89   11.30
 -11   0   4   93.49   10.70
   0  11   4  105.79   11.30
 -11   0   4  126.89   18.70
  11 -11   4   97.79   12.50
 -11  12  -4   -6.10    9.20
  12  -1  -4    6.90   10.70
  -1 -11  -4  -15.40   11.20
  12  -1  -4    8.70    7.80
  11 -12   4   -5.70    9.40
 -12   1   4   -5.30   10.60
   1  11   4    4.20    6.80
  11 -12   4    5.10    6.80
   1  11   4   -1.70    6.10
 -12   1   4    2.70    6.10
 -11  13  -4  430.26   26.90
  13  -2  -4  405.96   24.40
  13  -2  -4  508.85   26.70
  -2 -11  -4  481.35   33.30
   2  11   4  445.86   23.30
  11 -13   4  470.25   26.80
 -13   2   4  381.76   28.90
  11 -13   4  472.85   24.20
   2  11   4  400.76   23.70
 -13   2   4  456.05   22.20
 -11  14  -4  -15.00   11.00
  -3 -11  -4   13.90   15.80
  14  -3  -4   36.80   13.00
  11 -14   4   17.50   11.40
 -14   3   4   -3.60    7.70
  11 -14   4   -7.00    8.40
   3  11   4   -6.10    8.90
 -14   3   4    4.60   12.90
  -2  14  -4   79.29   29.50
  -2  14  -4  127.69   17.00
 -12  -2  -4  104.29   12.20
 -12  -2  -4   93.49   22.00
  14 -12  -4   89.79   15.10
 -14  12   4   99.49   15.10
  12   2   4  101.29   13.70
 -12  -1  -4   52.09   17.80
  13 -12  -4   -1.40   11.80
  -1  13  -4   18.30   23.70
  -1  13  -4   14.00    8.30
   1 -13   4   32.80    9.70
 -13  12   4   27.50   11.00
  12   1   4   28.20    9.30
   0  12  -4  184.98   25.20
 -12   0  -4  242.38   27.00
   0  12  -4  166.88   16.00
  12 -12  -4  177.48   19.90
 -12   0  -4  191.88   14.80
 -12  12   4  162.78   12.70
  12   0   4  187.88   16.90
   0 -12   4  181.98   17.00
 -12  12   4  171.38   18.00
   1  11  -4  -12.60    7.40
  11 -12  -4   -0.20    9.70
 -12   1  -4   -3.90    7.00
   1  11  -4   41.90   19.90
 -12   1  -4  -13.40   12.10
  12  -1   4   -4.00    7.40
 -11  12   4   -7.10    9.20
  -1 -11   4   -0.60    7.70
 -11  12   4   10.20    5.50
  10 -12  -4  303.67   21.60
   2  10  -4  313.87   28.90
   2  10  -4  326.47   19.40
 -12   2  -4  334.17   27.40
 -10  12   4  296.97   21.40
  -2 -10   4  291.57   23.30
  -2 -10   4  340.67   18.90
  12  -2   4  283.17   19.30
  12  -2   4  305.97   20.30
 -10  12   4  324.27   16.00
   3   9  -4  255.27   17.60
   9 -12  -4  259.57   19.60
 -12   3  -4  240.68   24.60
  -9  12   4  251.97   14.50
  -3  -9   4  263.87   16.40
  12  -3   4  248.38   17.10
  -3  -9   4  263.87   21.40
  12  -3   4  277.17   18.20
  -9  12   4  272.37   18.80
   8 -12  -4  444.76   24.20
 -12   4  -4  450.35   28.90
   4   8  -4  443.66   23.30
  12  -4   4  450.75   23.60
  12  -4   4  417.96   21.70
  -8  12   4  447.26   24.70
  -4  -8   4  401.56   25.60
  -8  12   4  453.05   20.10
  -4  -8   4  425.16   22.10
   7 -12  -4  -12.70    7.80
 -12   5  -4    2.20    9.80
   5   7  -4   -1.00    6.70
  12  -5   4   -2.00    7.20
  12  -5   4    0.30    6.20
  -5  -7   4    1.70    5.90
  -7  12   4    0.20    4.60
  -5  -7   4   -4.70    9.10
 -12   6  -4  445.36   28.30
   6 -12  -4  471.85   23.90
   6   6  -4  448.66   23.30
  -6  -6   4  420.96   26.20
  -6  12   4  465.35   25.80
  12  -6   4  476.35   23.70
  12  -6   4  475.35   23.40
  -6  -6   4  447.26   22.00
  -6  12   4  465.25   21.00
   7   5  -4   -2.60    6.80
   5 -12  -4   -3.30    7.80
 -12   7  -4   -7.30    9.50
  -7  -5   4    5.00   10.00
  -5  12   4    0.50    5.00
  12  -7   4   12.20    6.40
  -5  12   4   -7.20    7.50
  -7  -5   4   -3.80    5.60
  12  -7   4   -1.40    7.90
   4 -12  -4  436.26   26.60
   8   4  -4  429.56   22.60
 -12   8  -4  414.56   26.70
   4 -12  -4  445.46   22.60
  12  -8   4  446.26   23.80
  -8  -4   4  386.96   25.90
  -8  -4   4  426.76   20.90
  12  -8   4  459.15   22.50
  -4  12   4  444.36   20.70
 -12   9  -4  247.28   20.30
   9   3  -4  238.28   22.20
   3 -12  -4  267.07   21.00
   9   3  -4  248.38   17.20
   3 -12  -4  265.57   17.40
  -9  -3   4  232.68   21.30
  -9  -3   4  256.07   15.20
  12  -9   4  253.07   17.10
  12  -9   4  282.67   19.00
  -3  12   4  271.67   15.40
   2 -12  -4  321.17   23.70
  10   2  -4  312.47   19.20
  10   2  -4  296.97   23.00
 -12  10  -4  284.97   22.40
 -10  -2   4  345.47   17.60
  -2  12   4  318.97   18.10
  12 -10   4  347.57   21.00
 -10  -2   4  345.67   23.90
  12 -10   4  342.07   19.60
 -12  11  -4    6.30    9.90
   1 -12  -4   -6.50   11.50
  11   1  -4  -18.40   11.90
  11   1  -4   -1.90    7.50
 -11  -1   4   -5.20   11.50
  12 -11   4    7.40    8.60
  -1  12   4    5.30    6.70
 -11  -1   4    1.70    6.50
  12 -11   4    2.40    7.10
   0 -12  -4  193.78   23.80
 -12  12  -4  194.58   18.80
  12   0  -4  175.08   15.80
  12   0  -4  188.48   21.70
 -12   0   4  164.58   22.50
   0  12   4  162.68   14.70
  12 -12   4  158.28   15.90
 -12   0   4  188.08   13.80
  12 -12   4  179.38   18.70
  13  -1  -4   19.60    8.90
 -12  13  -4    6.30   11.10
  13  -1  -4   -1.00   14.70
  -1 -12  -4   21.30   14.80
 -13   1   4   15.30   13.60
   1  12   4   17.40    7.80
   1  12   4   29.60    8.10
  12 -13   4   15.80    8.60
  12 -13   4   27.00   11.70
 -13   1   4   23.60    8.20
  14  -2  -4  124.79   16.50
 -12  14  -4   98.19   15.20
  -2 -12  -4  167.18   27.50
   2  12   4   67.09   12.50
   2  12   4  103.09   11.90
 -14   2   4   96.29   16.60
  12 -14   4  109.39   15.30
 -14   2   4  113.99   14.10
  12 -14   4  108.89   17.30
   0  13  -4   -8.40    8.70
  13 -13  -4    1.10   12.50
 -13   0  -4   -2.60   17.00
  13   0   4    8.70    9.70
   0 -13   4    8.10    9.80
 -13  13   4  -11.90   10.30
  12 -13  -4   22.20   11.70
 -13   1  -4   28.00   16.50
   1  12  -4   22.70    8.60
 -12  13   4   23.70   12.00
  13  -1   4   17.90    9.10
  -1 -12   4   20.60    9.30
 -12  13   4    6.30    7.80
  11 -13  -4  474.05   27.40
   2  11  -4  426.86   25.30
 -13   2  -4  452.45   34.10
 -11  13   4  415.76   21.00
  -2 -11   4  455.55   24.20
 -11  13   4  414.76   27.40
  13  -2   4  444.96   25.80
 -13   3  -4   26.50   14.50
   3  10  -4   33.00    8.60
  10 -13  -4    2.90   10.40
  13  -3   4    6.80    8.60
  -3 -10   4   12.20    7.80
 -10  13   4   22.60    9.30
 -10  13   4   16.90    5.90
 -13   4  -4   34.00   12.60
   4   9  -4   -8.20    8.30
   9 -13  -4  -20.30   10.20
  13  -4   4  -16.70    8.90
  13  -4   4   -1.80    7.80
  -9  13   4   -1.40    5.60
  -9  13   4  -11.60    8.70
  -4  -9   4   -8.50    7.40
   8 -13  -4  426.36   24.60
 -13   5  -4  406.96   29.10
   5   8  -4  375.76   22.50
  -8  13   4  397.16   25.20
  -5  -8   4  396.36   21.40
  -8  13   4  404.46   19.50
  13  -5   4  406.06   23.10
  13  -5   4  400.06   22.10
   7 -13  -4  -11.10    8.90
 -13   6  -4    3.30   11.50
   6   7  -4   -1.70    7.30
  -7  13   4   13.80    6.10
  -7  13   4   -2.30    8.40
  13  -6   4    2.40    8.60
  -6  -7   4    8.80    6.90
  13  -6   4    4.90    7.80
   6 -13  -4    0.10    9.00
   7   6  -4   12.70    7.50
 -13   7  -4   -3.60   11.20
  13  -7   4    8.00    9.00
  -7  -6   4    2.50    6.80
  13  -7   4   11.70    7.10
  -6  13   4   13.20    6.70
  -6  13   4    2.10    9.60
   8   5  -4  397.16   22.20
   5 -13  -4  403.06   23.20
   5 -13  -4  418.66   26.40
 -13   8  -4  349.27   26.50
  13  -8   4  388.16   22.40
  -8  -5   4  404.26   26.20
  13  -8   4  405.56   23.40
  -8  -5   4  366.26   20.00
  -5  13   4  404.66   20.10
   4 -13  -4    5.60   11.30
 -13   9  -4   -2.50   10.50
   4 -13  -4    2.90    9.80
   9   4  -4   -0.10    7.40
  -4  13   4    8.50    6.60
  13  -9   4   -3.80    9.40
  -9  -4   4    7.70    6.50
  -9  -4   4   -0.20   11.70
  13  -9   4    7.50    7.00
   3 -13  -4   15.30   11.30
 -13  10  -4    8.70   10.60
  10   3  -4   22.90    8.30
  -3  13   4   33.30    7.30
 -10  -3   4   11.50    7.30
  13 -10   4   15.10   10.40
  13 -10   4   20.00    7.60
 -10  -3   4   34.60   12.70
   2 -13  -4  443.56   29.80
  11   2  -4  428.66   24.40
 -13  11  -4  428.16   27.80
 -11  -2   4  397.76   21.90
  13 -11   4  436.26   24.60
  -2  13   4  462.35   22.70
  13 -11   4  455.75   26.60
 -11  -2   4  417.06   29.40
 -13  12  -4   26.20   11.90
   1 -13  -4   -0.80   13.50
  12   1  -4   20.40    9.00
 -12  -1   4   13.10    7.80
 -12  -1   4   20.60   13.90
  13 -12   4   15.50    8.90
  13 -12   4   14.00   11.10
  -1  13   4   20.10    8.40
   0 -13  -4  -15.50   15.40
 -13  13  -4  -15.10   11.60
  13   0  -4   -0.70    9.00
  13 -13   4  -24.30   11.70
 -13   0   4  -17.80   14.80
 -13   0   4    8.10    7.90
   0  13   4   -7.50    8.50
 -14   2  -4  121.89   20.00
   2  12  -4  109.09   13.10
  12 -14  -4  112.09   16.60
  -2 -12   4  133.29   16.90
  14  -2   4  139.79   18.20
 -12  14   4  102.49   15.10
 -14   3  -4   18.80   15.10
  11 -14  -4   12.70   12.50
   3  11  -4   -6.50    9.20
 -11  14   4    9.10   10.70
 -11  14   4   -7.80    7.10
  -3 -11   4  -12.10    8.80
  14  -3   4   -9.10    8.90
   4  10  -4  249.38   20.00
 -14   4  -4  301.17   28.30
  10 -14  -4  249.18   23.10
 -10  14   4  263.47   21.30
 -10  14   4  260.57   16.10
  14  -4   4  216.48   20.70
  -4 -10   4  240.68   18.60
   5   9  -4   14.40    8.80
 -14   5  -4   21.90   13.40
   9 -14  -4    5.50   11.20
  -5  -9   4    2.40    8.60
  -9  14   4   -4.60   11.00
  -9  14   4   26.90    7.50
  14  -5   4   -5.70   10.50
  14  -5   4   12.30    9.20
 -14   6  -4  305.17   27.70
   6   8  -4  295.67   20.30
   8 -14  -4  320.97   23.60
  14  -6   4  347.17   21.80
  -8  14   4  310.37   17.80
  14  -6   4  315.07   21.50
  -8  14   4  284.57   22.60
  -6  -8   4  299.97   19.60
 -14   7  -4  333.17   29.40
   7   7  -4  356.66   23.00
   7 -14  -4  413.36   25.60
  -7  14   4  395.66   20.60
  -7  -7   4  400.56   21.80
  -7  14   4  399.16   26.30
  14  -7   4  423.66   24.30
  14  -7   4  400.66   23.90
   6 -14  -4  352.36   24.80
   8   6  -4  281.37   20.20
   6 -14  -4  321.87   22.70
 -14   8  -4  281.57   25.20
  14  -8   4  291.57   20.70
  -8  -6   4  260.97   18.50
  -6  14   4  308.77   17.90
  14  -8   4  329.57   22.20
   9   5  -4   17.30    9.20
   5 -14  -4   13.60   10.90
   5 -14  -4    5.70   12.10
 -14   9  -4   13.80   12.30
  14  -9   4   22.30   11.20
  -9  -5   4   22.70    7.60
  -5  14   4   17.70    7.70
  14  -9   4   17.00    8.40
   4 -14  -4  274.17   25.20
 -14  10  -4  284.57   24.50
  10   4  -4  256.37   19.40
  14 -10   4  293.07   20.40
 -10  -4   4  247.68   17.80
  14 -10   4  297.47   22.20
  -4  14   4  284.37   18.10
   3 -14  -4   15.30   13.30
 -14  11  -4   -5.40   12.00
  11   3  -4    7.10    9.10
  14 -11   4   13.70   11.10
  -3  14   4    6.50    7.80
 -11  -3   4   -4.10    7.70
  14 -11   4   13.10    8.60
 -14  12  -4   93.49   16.30
   2 -14  -4  121.29   18.80
  12   2  -4   95.49   16.30
  14 -12   4  131.39   19.70
  -2  14   4  114.09   15.10
  14 -12   4  100.19   16.70
 -12  -2   4  111.09   13.90
  10 -15  -4   -0.30   13.00
 -15   5  -4  -14.20   16.00
   5  10  -4  -22.00   10.30
 -10  15   4    7.00    8.30
  -5 -10   4    6.50    9.10
 -10  15   4  -10.20   11.70
  15  -5   4  -10.40   10.00
   6   9  -4   37.30   10.70
   9 -15  -4   72.89   14.70
 -15   6  -4   53.29   16.00
  15  -6   4   53.59   12.70
  -6  -9   4   98.09   15.30
  -9  15   4   75.89   10.00
  15  -6   4   51.89   11.20
  -9  15   4   62.09   13.90
 -15   7  -4   -7.00   14.50
   7   8  -4    9.00    9.20
   8 -15  -4    2.70   12.60
  -8  15   4   16.50    8.00
  -7  -8   4   -8.40    9.50
  -8  15   4   -3.80   11.80
  15  -7   4   -2.00    9.80
  15  -7   4    3.80   12.40
   7 -15  -4   -9.80   12.30
   7 -15  -4   12.00   13.00
 -15   8  -4    4.60   14.00
   8   7  -4    0.40    9.30
  15  -8   4   24.80   12.40
  -7  15   4    6.60    8.10
  15  -8   4    1.50    9.90
  -8  -7   4   -8.90    8.90
   9   6  -4   62.69   11.10
   6 -15  -4   62.79   14.30
   6 -15  -4   62.49   16.10
 -15   9  -4   53.09   14.30
  15  -9   4   60.79   11.70
  -9  -6   4   78.69   10.30
  15  -9   4   70.79   13.80
  -6  15   4   77.69   10.40
   5 -15  -4   -0.70   14.60
  10   5  -4    8.90    9.80
 -15  10  -4   24.90   13.80
  15 -10   4    8.80   10.20
  -5  15   4    3.70    8.20
 -10  -5   4   -3.90    8.40
  15 -10   4   17.10   12.90
   0   0  -5    3.20    3.20
   0   0  -5    1.30    2.20
   0   0   5   -0.60    2.10
   0   0   5   -1.20    1.40
   0   0   5   -0.30    1.10
  -1   0  -5  418.06   19.30
   1  -1  -5  450.95   18.70
   0   1  -5  419.56   18.70
   1  -1  -5  437.76   18.10
  -1   0  -5  437.36   18.50
   0  -1   5  446.16   18.10
  -1   1   5  435.56   17.20
   1   0   5  442.66   18.30
   0  -1   5  426.36   17.10
   1   0   5  437.26   16.90
   0  -1  -5  443.26   18.90
   0  -1  -5  412.06   17.50
  -1   1  -5  443.66   18.70
  -1   1  -5  417.56   18.60
   1   0  -5  431.56   18.00
   1  -1   5  447.56   16.60
   1  -1   5  364.36   18.20
   0   1   5  424.16   17.70
  -1   0   5  420.26   16.80
   0   1   5  425.96   16.70
   1  -1   5  444.86   18.00
  -1   2  -5    7.10    4.40
   2  -1  -5    3.30    2.30
  -1  -1  -5   -1.30    2.60
  -1  -1  -5   -5.90    3.00
   2  -1  -5    2.50    3.00
   1   1   5   -2.50    1.20
  -2   1   5   -1.40    1.50
   1   1   5   -0.60    1.70
  -2   1   5    1.10    1.70
   1  -2   5   -2.00    1.50
   1  -2   5   -2.60    1.20
  -1   3  -5   91.49   10.00
   3  -2  -5   83.09    6.80
  -2  -1  -5   92.39    7.70
  -2  -1  -5   93.99    7.90
   2   1   5   95.29    4.80
   1  -3   5   85.89    4.90
  -3   2   5  101.79    5.30
  -3   2   5   86.89    5.60
   2   1   5   92.29    5.70
   0   2  -5   -1.90    1.80
  -2   0  -5    4.60    3.10
   2  -2  -5   -0.30    2.50
   0   2  -5  -10.00    4.20
  -2   0  -5    0.30    3.70
   2   0   5    1.10    1.20
   0  -2   5   -1.20    1.50
   2   0   5   -0.80    1.60
  -2   2   5    1.50    1.40
  -2   2   5    6.00    2.40
  -2   1  -5   -2.20    2.60
  -2   1  -5   -6.80    3.50
   1  -2  -5   -1.40    2.40
   1  -2  -5   -2.70    2.10
   1   1  -5   -3.10    3.20
  -1  -1   5   -1.30    1.40
   2  -1   5   -3.10    1.00
   2  -1   5   -1.80    1.60
  -1   2   5   -3.20    1.30
  -2   2  -5    1.20    4.30
   0  -2  -5    0.50    2.90
  -2   2  -5    2.00    2.80
   2   0  -5    1.10    3.20
   2   0  -5    1.80    1.70
  -2   0   5   -0.30    1.60
   2  -2   5    1.40    1.30
   0   2   5   -0.70    1.40
   0   2   5    3.40    1.50
   2  -2   5    2.00    1.80
  -2   3  -5   68.49    6.10
  -1  -2  -5   90.89    6.80
  -2   3  -5   97.49   10.10
  -1  -2  -5  100.99    7.50
   3  -1  -5   74.79    6.10
   3  -1  -5   83.89    6.60
   2  -3   5   93.99    5.80
   2  -3   5   87.49    4.50
  -3   1   5   94.19    5.30
   1   2   5   88.69    5.40
   1   2   5   94.59    4.80
  -3   1   5   88.09    5.10
  -2  -2  -5    4.00    3.40
  -2   4  -5   -2.90    5.00
  -2   4  -5    0.70    2.50
   4  -2  -5   -0.20    2.80
  -2  -2  -5    2.50    3.50
   2  -4   5   -1.90    1.60
   2   2   5   -0.80    1.90
   2  -4   5   -1.40    1.90
  -4   2   5   -3.20    1.60
   2   2   5   -3.00    1.70
   5  -3  -5   64.69    6.90
  -3  -2  -5   62.69    8.20
  -2   5  -5   70.49   10.60
   2  -5   5   65.09    4.70
   3   2   5   60.49    5.60
  -5   3   5   70.79    4.80
   3   2   5   66.59    4.60
  -5   3   5   67.19    6.00
  -3  -1  -5  103.69    8.80
  -1   4  -5  108.19   11.20
   4  -3  -5  103.19    7.60
  -3  -1  -5  101.19    9.40
  -1   4  -5   98.79    6.80
  -4   3   5  106.29    6.80
   1  -4   5   96.79    5.50
   3   1   5   97.39    6.30
   3   1   5  103.19    5.50
  -4   3   5  104.39    5.60
   3  -3  -5   62.99    5.90
  -3   0  -5   60.89    6.70
  -3   0  -5   68.69    7.10
   0   3  -5   54.19    8.60
   0   3  -5   36.20    4.90
  -3   3   5   49.30    4.90
   0  -3   5   46.80    3.90
   3   0   5   51.29    4.40
  -3   3   5   50.89    3.80
   2  -3  -5   88.19    6.30
   1   2  -5   91.39    5.60
  -3   1  -5   83.29    7.60
  -3   1  -5  102.79    9.10
   1   2  -5   99.59    8.90
  -2   3   5   78.39    4.80
  -2   3   5   86.79    6.20
   3  -1   5   82.69    4.30
   3  -1   5   93.49    5.70
  -1  -2   5   88.49    4.90
   1  -3  -5   72.29    6.00
  -3   2  -5   81.19    4.60
   2   1  -5   94.29    7.80
   1  -3  -5  105.39    7.10
  -3   2  -5   98.39    9.40
  -3   2  -5   83.79    7.30
   2   1  -5   97.39    5.80
  -1   3   5   86.39    4.90
   3  -2   5   91.09    5.60
  -2  -1   5   89.19    5.10
   3   0  -5   38.40    4.40
   3   0  -5   56.59    6.40
  -3   3  -5   58.59    9.00
   0  -3  -5   51.29    6.00
   0  -3  -5   44.70    5.50
  -3   3  -5   50.29    6.10
   3  -3   5   58.89    4.70
  -3   0   5   51.59    4.00
   0   3   5   44.50    3.70
  -1  -3  -5  103.89    8.40
  -1  -3  -5   94.59    7.00
   4  -1  -5  103.89    7.40
   4  -1  -5   99.69    5.90
  -3   4  -5   95.39   10.80
  -3   4  -5  101.29    7.10
  -4   1   5  100.39    5.60
   1   3   5   99.39    5.60
   3  -4   5  112.39    6.60
   1   3   5   98.09    6.10
   3  -4   5   92.69    4.80
  -2  -3  -5   64.29    8.10
  -3   5  -5   64.69    8.40
   5  -2  -5   71.89    6.90
  -3   5  -5   57.09    6.10
  -5   2   5   65.79    5.60
   3  -5   5   64.39    5.60
   3  -5   5   68.49    4.10
   2   3   5   61.79    5.50
  -5   2   5   64.69    4.60
   2   3   5   64.39    4.70
  -3   6  -5   -6.30    2.70
  -3  -3  -5   -0.50    4.40
   6  -3  -5    4.60    3.70
  -3   6  -5    6.40    6.10
   3   3   5   -0.30    2.80
   3  -6   5   -4.90    2.10
   3  -6   5   -2.50    2.30
  -6   3   5   -0.50    2.10
  -6   3   5    2.60    3.20
   3   3   5   -1.70    2.00
   7  -4  -5    8.30    4.00
  -3   7  -5    6.40    3.40
  -4  -3  -5    5.60    6.10
  -3   7  -5   -0.90    8.30
   4   3   5    7.30    2.70
   4   3   5    4.10    3.50
  -7   4   5    9.20    2.70
  -7   4   5    7.10    4.10
   3  -7   5    6.10    3.00
  -4  -2  -5   15.90    5.60
   6  -4  -5   11.80    4.00
  -2   6  -5   11.20    7.50
  -2   6  -5   13.80    3.50
  -6   4   5   13.10    3.90
   4   2   5   10.40    2.60
   2  -6   5   15.50    3.00
  -6   4   5    9.00    2.50
   4   2   5   12.80    3.30
  -4  -1  -5   23.90    5.30
  -1   5  -5   17.00    6.60
   5  -4  -5   11.30    4.00
  -4  -1  -5   15.70    4.90
  -1   5  -5   16.60    3.60
   1  -5   5   18.90    2.90
   4   1   5   15.70    3.10
   4   1   5   11.60    2.50
  -5   4   5   14.60    2.40
  -5   4   5   18.70    3.40
   4  -4  -5  238.98   12.00
  -4   0  -5  265.17   14.40
   0   4  -5  232.28   15.00
   0   4  -5  242.18   11.90
  -4   0  -5  260.37   13.80
   4   0   5  238.08   10.20
   4   0   5  245.68   11.90
   0  -4   5  240.08   10.80
  -4   4   5  246.68   12.00
  -4   4   5  233.48   10.50
   1   3  -5  105.39    6.80
  -4   1  -5  110.19   10.20
  -4   1  -5  112.69    9.30
   1   3  -5   97.89   10.00
   3  -4  -5  103.79    7.40
   4  -1   5  106.99    6.50
  -3   4   5  115.89    7.30
  -1  -3   5   97.09    5.90
   4  -1   5   92.49    5.00
  -3   4   5   98.69    5.60
   2   2  -5   -1.10    2.40
   2   2  -5   -5.40    3.90
  -4   2  -5   -1.10    3.60
   2  -4  -5   -0.60    2.80
  -4   2  -5   -1.30    4.90
  -2   4   5   -1.30    1.50
  -2   4   5   -2.50    2.40
   4  -2   5   -2.30    1.90
  -2  -2   5   -4.30    1.70
   3   1  -5  106.69    6.80
   1  -4  -5   97.69    7.10
  -4   3  -5  123.89    8.80
  -4   3  -5  103.59   10.80
   3   1  -5  117.99    8.80
   1  -4  -5  107.79    8.30
  -3  -1   5  130.39    6.40
  -1   4   5  101.59    5.90
   4  -3   5  104.69    6.60
  -4   4  -5  234.18   12.70
   4   0  -5  262.87   12.70
  -4   4  -5  254.37   15.20
   4   0  -5  238.38   11.40
   0  -4  -5  233.48   13.10
   0  -4  -5  234.38   11.20
   4  -4   5  245.78   11.70
   0   4   5  242.48   10.70
  -4   0   5  245.08   10.90
   5  -1  -5   17.10    3.20
  -4   5  -5   30.30    7.10
   5  -1  -5   17.70    4.10
  -1  -4  -5   17.20    5.00
  -4   5  -5   18.90    3.90
  -5   1   5   15.60    2.60
  -5   1   5   16.30    3.20
   1   4   5   15.30    3.00
   1   4   5   25.30    3.80
   4  -5   5   25.10    4.40
   6  -2  -5    8.30    4.10
  -4   6  -5   16.90    7.60
   6  -2  -5   15.00    3.00
  -4   6  -5   12.60    4.00
  -2  -4  -5   14.20    5.70
   4  -6   5   14.40    3.30
  -6   2   5   13.60    3.00
   2   4   5   10.20    3.40
  -6   2   5   10.90    3.60
   2   4   5   13.50    2.90
  -4   7  -5    4.40    3.80
  -4   7  -5    5.70    8.10
   7  -3  -5    6.80    4.40
  -3  -4  -5   10.50    5.40
   4  -7   5    9.60    2.70
  -7   3   5    6.80    4.10
  -7   3   5    8.60    2.70
   3   4   5    8.20    3.60
   4  -7   5   10.60    3.70
   8  -4  -5   -1.50    4.60
  -4   8  -5    2.30    3.80
  -4   8  -5   -1.70    8.80
  -4  -4  -5    6.00    6.10
  -8   4   5    4.60    2.90
   4  -8   5   -1.80    3.40
   4   4   5    0.50    3.30
   4  -8   5   -3.00    3.20
   4   4   5    2.90    4.00
  -8   4   5   -3.20    4.30
  -4   9  -5   -9.50   10.70
  -5  -4  -5    0.30    7.80
   9  -5  -5    1.40    4.90
  -4   9  -5   -0.60    4.20
   4  -9   5    4.70    3.90
  -9   5   5    2.00    3.10
   5   4   5    5.30    3.70
  -9   5   5    1.90    5.60
   4  -9   5   -3.00    3.60
   5   4   5    6.60    4.50
  -5  -3  -5   87.79   12.40
   8  -5  -5   92.29    9.60
  -3   8  -5   77.99    7.60
  -3   8  -5   87.49   12.70
   5   3   5   81.09    6.70
  -8   5   5   80.19    9.00
   5   3   5   69.49    8.80
  -8   5   5   79.19    6.30
   3  -8   5   80.39    7.20
  -2   7  -5    5.20    3.00
  -2   7  -5    2.40    3.50
  -5  -2  -5    9.40    6.30
   7  -5  -5   10.10    4.40
  -2   7  -5    9.30    7.70
  -7   5   5   10.10    4.20
   2  -7   5   -0.20    2.90
  -7   5   5    2.40    2.40
   5   2   5    3.90    3.50
   5   2   5    1.90    2.60
  -1   6  -5    6.50    3.30
  -1   6  -5    3.60    6.80
  -5  -1  -5   14.20    6.30
   6  -5  -5    7.10    4.30
  -6   5   5   -1.10    3.50
  -6   5   5    6.30    2.30
   5   1   5    5.70    2.90
   1  -6   5    9.50    3.10
   5   1   5    4.30    2.40
  -5   0  -5   61.79    9.20
   0   5  -5   58.79    6.10
   0   5  -5   67.29    9.00
   5  -5  -5   47.90    6.50
  -5   0  -5   60.09    7.60
  -5   5   5   68.29    6.40
   0  -5   5   67.09    5.30
  -5   5   5   60.49    4.70
   5   0   5   44.70    4.30
   5   0   5   46.70    5.60
   1   4  -5   18.00    6.40
  -5   1  -5   20.10    6.60
   4  -5  -5   14.20    4.00
   1   4  -5   20.60    3.50
  -5   1  -5   19.10    5.00
  -4   5   5   20.80    3.70
   5  -1   5   16.50    2.30
  -1  -4   5   17.40    3.00
  -4   5   5   16.00    2.50
   5  -1   5   13.60    3.20
  -5   2  -5   60.39    8.30
   3  -5  -5   60.09    6.50
   2   3  -5   66.99    9.60
   2   3  -5   66.89    5.80
  -5   2  -5   69.29   10.60
   5  -2   5   67.59    5.80
  -3   5   5   58.79    4.40
  -3   5   5   67.39    6.30
  -2  -3   5   62.29    4.90
   2  -5  -5   64.09    6.80
   3   2  -5   59.39    8.40
   3   2  -5   74.09    6.10
   2  -5  -5   57.59    6.20
  -5   3  -5   67.19    8.20
  -5   3  -5   72.19   10.60
  -3  -2   5   67.79    5.10
   5  -3   5   69.69    5.50
  -2   5   5   67.19    4.70
   4   1  -5   19.30    3.30
  -5   4  -5   14.80    4.40
   1  -5  -5   17.30    4.30
   1  -5  -5   12.90    3.60
   4   1  -5   18.00    4.70
  -5   4  -5   20.10    6.80
  -4  -1   5   25.60    4.00
   5  -4   5   18.60    3.10
  -1   5   5   15.40    2.70
   0  -5  -5   49.00    5.70
   0  -5  -5   50.79    7.40
  -5   5  -5   58.19    7.40
   5   0  -5   61.49    6.20
  -5   5  -5   55.69    8.50
   5   0  -5   73.69    8.00
   5  -5   5   69.59    5.80
   0   5   5   68.19    5.10
  -5   0   5   63.69    5.90
  -5   0   5   60.39    4.90
   6  -1  -5    6.90    3.40
  -5   6  -5    6.00    4.00
   6  -1  -5   -0.20    4.10
  -1  -5  -5    7.80    4.60
  -5   6  -5    7.30    6.90
  -6   1   5    8.90    2.50
   5  -6   5   10.70    3.20
   1   5   5    7.30    2.60
   1   5   5    2.40    3.10
  -6   1   5    9.30    3.70
  -2  -5  -5    0.40    5.60
  -5   7  -5   -5.30    7.50
  -5   7  -5    2.50    4.10
   7  -2  -5   -2.50    4.30
   7  -2  -5    7.00    3.50
   2   5   5    2.40    2.60
   2   5   5    2.80    3.60
   5  -7   5    7.00    3.40
  -7   2   5    3.90    2.50
  -7   2   5    2.30    4.20
  -5   8  -5   69.19   11.80
  -3  -5  -5   59.09    9.10
   8  -3  -5   78.59    7.70
   8  -3  -5   82.99    9.80
  -5   8  -5   68.29    8.50
   3   5   5   75.19    6.70
   3   5   5   84.69    8.70
  -8   3   5   82.39    8.90
   5  -8   5   71.29    8.20
  -8   3   5   70.99    6.40
   9  -4  -5    1.90    5.40
  -4  -5  -5    0.70    7.60
  -5   9  -5   10.80    4.70
  -5   9  -5   23.80   10.00
   5  -9   5    4.10    3.70
  -9   4   5    3.60    5.60
   4   5   5    3.20    3.60
   5  -9   5    1.80    4.30
  -9   4   5    0.10    3.20
   4   5   5    3.70    4.40
  -5  10  -5   -2.20   12.90
  10  -5  -5    6.00    6.20
  -5  10  -5   -6.20    5.20
  -5  -5  -5    2.40    9.10
   5 -10   5    3.60    4.50
   5   5   5    9.30    4.20
   5   5   5   -1.30    4.80
 -10   5   5   -1.20    6.60
 -10   5   5   -7.20    3.50
   5 -10   5    5.00    5.20
  -5  11  -5  193.28   15.30
  -6  -5  -5  255.87   21.60
  -5  11  -5  238.98   28.20
  11  -6  -5  254.87   17.00
   6   5   5  222.38   15.80
 -11   6   5  208.08   11.90
   5 -11   5  224.88   13.20
 -11   6   5  226.08   16.60
   6   5   5  223.38   12.90
   5 -11   5  196.28   13.70
  -4  10  -5   25.80    6.00
  -6  -4  -5   43.80   10.60
  -4  10  -5   49.99   12.90
  10  -6  -5   37.40    7.40
   6   4   5   32.30    5.50
   4 -10   5   36.80    5.70
 -10   6   5   37.30    8.10
 -10   6   5   30.80    4.70
   6   4   5   32.50    6.30
  -3   9  -5   27.60    4.90
   9  -6  -5   25.30    6.30
  -6  -3  -5   31.40    9.10
  -3   9  -5   26.10   12.10
  -9   6   5   26.10    6.50
   6   3   5   22.20    5.40
   6   3   5   25.90    4.60
   3  -9   5   22.40    4.90
  -9   6   5   33.70    5.30
  -2   8  -5   79.49   13.10
  -2   8  -5   67.89    8.20
  -6  -2  -5   61.99   10.00
  -2   8  -5   84.19    7.60
   8  -6  -5   65.29    9.60
   2  -8   5   63.69    7.20
   6   2   5   68.79    6.20
  -8   6   5   74.39    8.60
   6   2   5   72.59    8.50
  -8   6   5   63.29    5.80
  -1   7  -5   33.50    5.10
  -1   7  -5   38.00   10.00
   7  -6  -5   39.70    6.30
   6   1   5   42.00    7.20
   6   1   5   37.50    4.60
   1  -7   5   45.30    6.10
  -7   6   5   40.90    5.80
  -7   6   5   45.90    5.10
  -6   0  -5  164.38   14.10
   0   6  -5  157.38   10.60
   0   6  -5  224.28   15.90
   6  -6  -5  204.18   11.80
  -6   0  -5  183.98   13.20
   6   0   5  190.78    8.90
   6   0   5  184.88   10.60
  -6   6   5  202.68   11.30
   0  -6   5  184.18   10.00
  -6   6   5  191.98    9.30
  -6   1  -5   10.50    5.90
   1   5  -5    9.90    3.40
   5  -6  -5    6.60    4.20
   1   5  -5   -3.80    7.20
  -5   6   5    7.90    3.40
  -5   6   5    8.00    2.30
   6  -1   5    9.80    3.20
  -1  -5   5   10.40    2.80
   6  -1   5    5.60    2.10
  -6   2  -5   18.60    5.50
  -6   2  -5   13.20    6.50
   2   4  -5   14.30    6.80
   2   4  -5    9.40    3.10
   4  -6  -5   10.50    3.80
  -2  -4   5   11.00    2.80
  -4   6   5   15.90    2.80
   6  -2   5   10.80    3.20
  -4   6   5   14.40    3.70
  -6   3  -5   -4.00    4.50
   3   3  -5    1.60    3.20
  -6   3  -5    2.60    6.50
   3  -6  -5   -3.70    3.20
   3   3  -5    2.30    6.00
  -3   6   5   -0.90    3.00
  -3   6   5   -3.10    1.80
   6  -3   5   -1.30    2.50
  -3  -3   5    0.10    2.30
   2  -6  -5   15.00    4.00
  -6   4  -5   21.70    7.00
   4   2  -5   12.30    3.60
   2  -6  -5   11.80    4.00
  -6   4  -5    6.20    4.70
   4   2  -5   12.30    5.80
  -4  -2   5   14.50    2.90
   6  -4   5   12.20    2.90
  -2   6   5   13.30    2.80
  -6   5  -5    9.30    4.40
  -6   5  -5   15.40    7.10
   5   1  -5    8.40    3.50
   1  -6  -5    5.00    3.50
   1  -6  -5   11.20    4.60
   5   1  -5    4.50    4.90
  -1   6   5   10.30    2.60
   6  -5   5    6.90    3.10
  -5  -1   5    7.40    2.70
   0  -6  -5  167.98   12.80
   6   0  -5  196.38   11.00
   0  -6  -5  173.38   10.00
   6   0  -5  222.08   12.50
  -6   6  -5  203.28   12.70
  -6   6  -5  218.08   16.90
  -6   0   5  201.58    9.80
   6  -6   5  198.98   10.80
  -6   0   5  199.58   11.20
   7  -1  -5   36.00    6.20
   7  -1  -5   44.50    7.20
  -6   7  -5   43.60    6.40
  -6   7  -5   54.89   10.20
  -1  -6  -5   39.10    7.40
  -7   1   5   46.70    7.70
   6  -7   5   43.40    6.40
   1   6   5   42.60    5.60
  -7   1   5   41.60    5.60
   1   6   5   60.09    7.80
  -2  -6  -5   64.09    9.80
  -6   8  -5   79.69   12.60
  -6   8  -5   74.29    9.10
   8  -2  -5   82.29   10.00
   8  -2  -5   64.39    8.20
  -8   2   5   64.79    6.50
   2   6   5   66.09    6.80
  -8   2   5   61.59    9.20
   6  -8   5   66.89    7.70
   9  -3  -5   22.90    5.20
  -6   9  -5   22.80    5.80
  -6   9  -5   28.20   11.80
   9  -3  -5   25.30    6.80
  -3  -6  -5   26.50    7.90
   3   6   5   25.50    4.70
   3   6   5   10.50    5.50
   6  -9   5   27.90    5.20
  -9   3   5   27.90    7.10
  -9   3   5   20.70    4.20
  10  -4  -5   37.30    6.30
  10  -4  -5   34.80    7.80
  -4  -6  -5   25.60    9.40
  -6  10  -5   38.50   13.40
  -6  10  -5   26.80    7.10
   4   6   5   38.90    5.80
 -10   4   5   33.90    5.00
 -10   4   5   48.60    8.20
   4   6   5   18.30    6.70
   6 -10   5   39.30    6.30
  11  -5  -5  192.98   16.00
  -6  11  -5  204.98   29.10
  -6  11  -5  227.28   15.20
  -5  -6  -5  218.98   21.00
   6 -11   5  228.28   12.60
 -11   5   5  208.38   16.90
   5   6   5  193.08   15.50
   5   6   5  222.58   13.30
 -11   5   5  214.58   11.80
   6 -11   5  188.78   14.70
  -6  -6  -5   21.50   11.90
  -6  12  -5  -13.90    7.80
  -6  12  -5   11.30   17.30
  12  -6  -5    9.00    8.20
   6 -12   5    0.20    7.20
 -12   6   5    5.80    8.40
   6   6   5   -7.40    7.10
   6   6   5  -10.90    5.50
 -12   6   5    6.90    4.80
   6 -12   5   -3.50    5.70
  13  -7  -5   62.09   11.30
  -6  13  -5   50.79   22.60
  -7  -6  -5   53.79   15.60
  -6  13  -5   63.99   10.50
 -13   7   5   66.49   11.00
   7   6   5   38.90    9.20
   6 -13   5   59.09    8.20
   7   6   5   63.59   10.20
 -13   7   5   87.29    9.00
   6 -13   5   59.09    9.50
  -7  -5  -5   -6.20   13.00
  12  -7  -5   12.10    8.20
  -5  12  -5  -10.00   17.60
  -5  12  -5    4.10    7.20
 -12   7   5   11.40    4.40
   5 -12   5   -1.80    6.10
   7   5   5   -8.90    5.10
 -12   7   5   -0.10    8.70
   5 -12   5    6.60    6.00
   7   5   5  -11.90    7.20
  11  -7  -5   23.40    8.20
  -4  11  -5   19.30   16.20
  -4  11  -5    8.50    6.70
  -7  -4  -5   18.90   11.30
 -11   7   5   12.80    4.60
 -11   7   5   21.60    8.20
   7   4   5   13.10    6.40
   4 -11   5    2.40    4.70
   7   4   5    5.00    4.80
   4 -11   5   17.70    5.70
  -3  10  -5   27.40    6.10
  -3  10  -5   46.50   14.10
  -3  10  -5   11.60    5.30
  10  -7  -5   18.90    6.80
  -7  -3  -5   14.00    9.50
   3 -10   5   14.10    5.10
   7   3   5   11.50    4.50
 -10   7   5   15.80    6.50
   7   3   5   20.00    5.40
   9  -7  -5    7.40    5.60
  -2   9  -5    4.30    4.70
  -2   9  -5    1.00    4.90
  -2   9  -5   -2.40   10.60
   2  -9   5   -8.30    4.10
   7   2   5   -3.70    4.70
   7   2   5   -2.10    3.40
  -9   7   5    5.00    3.60
  -9   7   5  -10.60    5.90
  -7  -1  -5   66.39   10.70
  -1   8  -5   84.39   12.80
   8  -7  -5   89.29   10.30
  -1   8  -5   65.89    8.30
   1  -8   5   76.59    8.30
  -8   7   5   84.59    9.70
   7   1   5   78.99    6.50
  -8   7   5   87.19    6.60
   7   1   5   87.39    9.30
  -7   0  -5   31.80    9.00
   7  -7  -5   31.50    5.90
   0   7  -5   24.20    9.80
   0   7  -5   31.40    5.10
   0  -7   5   32.90    5.10
   7   0   5   41.60    4.80
   7   0   5   32.20    5.20
  -7   7   5   29.70    6.00
  -7   7   5   32.30    5.00
   1   6  -5   43.50    9.50
  -7   1  -5   45.90    9.10
   1   6  -5   39.30    5.30
  -7   1  -5   49.70    8.80
   6  -7  -5   42.70    6.50
   7  -1   5   47.10    4.50
  -1  -6   5   42.60    6.00
  -6   7   5   38.80    6.50
  -6   7   5   40.30    4.70
   7  -1   5   41.90    6.50
   2   5  -5    3.60    7.50
   5  -7  -5    4.40    4.10
   2   5  -5    6.20    3.70
  -7   2  -5   -7.20    7.20
  -7   2  -5   -1.80    6.30
  -2  -5   5    1.50    3.00
  -5   7   5    6.00    3.90
  -5   7   5    6.90    2.50
   7  -2   5    4.60    3.20
   3   4  -5   12.30    7.20
   3   4  -5    9.10    3.90
  -7   3  -5    8.10    5.30
  -7   3  -5    3.20    7.50
   4  -7  -5    3.80    4.20
   7  -3   5    4.50    3.20
  -4   7   5    8.40    2.70
  -3  -4   5    3.40    2.80
  -4   7   5    7.50    3.70
  -7   4  -5    6.60    5.60
   4   3  -5    9.90    6.50
   3  -7  -5    3.90    4.10
  -7   4  -5    2.40    7.30
   4   3  -5    5.40    3.80
  -4  -3   5    5.00    3.10
   7  -4   5    3.90    3.10
  -3   7   5    8.50    2.60
  -3   7   5    0.20    3.70
   2  -7  -5    1.30    4.40
  -7   5  -5    3.80    4.90
   2  -7  -5   -1.70    4.80
   5   2  -5   -0.50    3.70
   5   2  -5    6.50    5.80
  -7   5  -5   -0.50    7.30
   7  -5   5    0.90    3.10
  -2   7   5    2.30    2.90
  -5  -2   5    0.00    2.70
   1  -7  -5   32.80    6.60
   1  -7  -5   41.20    5.20
  -7   6  -5   44.80   10.40
   6   1  -5   40.50    5.10
   6   1  -5   40.20    7.20
  -7   6  -5   23.70    6.20
  -6  -1   5   48.60    5.60
   7  -6   5   39.00    6.50
  -6  -1   5   46.00    7.50
  -1   7   5   37.20    5.30
  -7   7  -5   28.80   10.60
  -7   7  -5   36.80    7.30
   7   0  -5   36.70    5.50
   0  -7  -5   35.30    6.50
   7   0  -5   33.60    6.90
  -7   0   5   30.80    4.40
   0   7   5   34.60    5.50
  -7   0   5   34.70    6.00
   7  -7   5   29.80    4.60
  -1  -7  -5   73.19   12.50
  -7   8  -5  127.39   18.30
   8  -1  -5   90.39    9.30
   8  -1  -5  106.69   10.90
  -7   8  -5   71.99   11.20
   1   7   5   90.29    7.60
  -8   1   5   87.79   10.20
   7  -8   5   71.99    7.90
  -8   1   5   89.89    7.40
   1   7   5   72.99    8.80
   9  -2  -5   -0.30    4.40
  -7   9  -5    0.60    6.30
   9  -2  -5    0.40    5.80
  -2  -7  -5   -4.70    6.80
  -7   9  -5    2.60   10.70
  -9   2   5   -2.50    6.20
   2   7   5    2.20    3.70
   7  -9   5    2.90    4.00
   2   7   5    2.50    4.90
  -9   2   5   -3.10    3.60
  -7  10  -5   15.10    6.90
  10  -3  -5   16.20    5.30
  10  -3  -5   15.50    6.40
  -3  -7  -5    9.50    8.40
  -7  10  -5   10.50   13.10
 -10   3   5    7.90    7.60
   3   7   5   17.10    5.00
   3   7   5   15.00    5.40
 -10   3   5   15.00    4.80
   7 -10   5    9.60    5.30
  11  -4  -5   22.00    7.60
  -7  11  -5   37.20   16.80
  -4  -7  -5   10.00   10.00
  -7  11  -5    4.00    7.00
  11  -4  -5   14.90    5.80
 -11   4   5   25.00    8.80
   4   7   5   18.80    5.50
   4   7   5   14.70    6.30
 -11   4   5   19.70    5.00
   7 -11   5    7.70    6.20
  -7  12  -5    7.10    7.60
  -5  -7  -5    1.50   11.60
  12  -5  -5  -12.70    6.00
  -7  12  -5   -6.50   17.70
  12  -5  -5    2.40    8.60
   5   7   5    0.50    5.70
 -12   5   5   -8.30    8.60
   5   7   5    4.60    6.70
   7 -12   5    0.40    7.00
  13  -6  -5   68.19   11.50
  -7  13  -5   55.59   11.40
  -7  13  -5   64.79   22.40
  -6  -7  -5   87.99   15.80
   6   7   5   82.09   13.70
 -13   6   5   77.39    9.30
   7 -13   5   66.59    9.40
 -13   6   5   56.59   11.50
   6   7   5   48.40    8.40
  -7  14  -5    5.80    9.90
  -7  14  -5  -13.40   23.50
  14  -7  -5   -5.30   11.00
  -7  -7  -5    6.30   16.40
   7 -14   5   11.70    9.00
   7   7   5   12.40    6.90
 -14   7   5   11.70   10.60
   7   7   5    8.30    8.90
 -14   7   5   -1.60    6.00
  15  -8  -5   29.80   13.70
  -7  15  -5   -1.10   12.50
  -7  15  -5   15.40   25.80
  -8  -7  -5   55.69   19.00
 -15   8   5    6.00   13.00
   8   7   5   10.90   10.60
   8   7   5   13.40    8.10
  -6  14  -5   21.50   11.30
  14  -8  -5   49.50   11.90
  -8  -6  -5   74.29   18.30
  -6  14  -5   83.59   25.70
 -14   8   5   39.30   12.10
   8   6   5   30.10    9.40
   6 -14   5   51.89   10.60
   8   6   5   43.90    8.40
  -8  -5  -5   39.60   14.30
  13  -8  -5   42.40   11.00
  -5  13  -5   35.70   22.80
  -5  13  -5   30.80    9.60
   5 -13   5   49.30    8.00
 -13   8   5   33.90    5.80
   8   5   5   26.80    6.60
   5 -13   5   37.40    7.50
 -13   8   5   18.00   10.20
  -8  -4  -5   41.60   13.50
  -4  12  -5    6.90   18.10
  -4  12  -5   16.20    8.50
  12  -8  -5   13.00    8.40
   4 -12   5    9.00    6.50
 -12   8   5   11.70    5.20
   4 -12   5    8.90    5.60
   8   4   5    7.40    7.00
 -12   8   5   10.60    7.90
   8   4   5   15.30    5.40
  11  -8  -5   31.20    8.70
  -3  11  -5   21.10   16.10
  -8  -3  -5   31.20   12.30
  -3  11  -5   27.40    6.90
  -3  11  -5   17.30    7.00
 -11   8   5   17.10    8.90
   8   3   5   22.60    6.60
 -11   8   5   29.40    5.30
   3 -11   5   31.80    6.60
   8   3   5   26.50    5.20
  -2  10  -5    7.10    5.40
  -8  -2  -5   10.70   11.00
  -2  10  -5   12.00   13.50
  10  -8  -5   -3.00    6.50
   8   2   5    6.30    3.90
 -10   8   5   -7.70    6.20
   2 -10   5    5.10    5.00
 -10   8   5    2.70    4.10
   2 -10   5   -5.00    6.60
   8   2   5   -5.10    5.40
  -8  -1  -5   -4.60    8.40
  -1   9  -5   14.10   12.20
   9  -8  -5   10.00    6.50
   1  -9   5    9.80    6.20
   1  -9   5   -1.30    4.80
   8   1   5    1.60    5.00
  -9   8   5    4.60    3.40
   8   1   5   -5.00    3.50
  -9   8   5    2.10    6.30
   8  -8  -5   14.30    6.20
   0   8  -5   22.20   12.10
   0   8  -5   20.90    5.10
  -8   0  -5   15.60    8.80
  -8   8   5   15.80    3.70
   8   0   5   15.00    5.10
   0  -8   5   12.80    4.90
  -8   8   5   17.60    5.80
   8   0   5   14.00    3.50
  -8   1  -5   86.09   11.80
   1   7  -5   83.09   12.50
   1   7  -5   73.89    8.70
   7  -8  -5   87.49   10.30
  -8   1  -5   92.19   14.20
   8  -1   5   83.19    6.00
   8  -1   5   87.99    9.00
  -1  -7   5   83.09    8.00
  -7   8   5   78.49    6.80
  -7   8   5   65.29    9.90
   2   6  -5   55.29   10.80
   2   6  -5   74.49    8.30
  -8   2  -5   63.49   10.60
   6  -8  -5   73.29    9.30
  -8   2  -5   84.49   11.60
  -2  -6   5   74.69    7.50
  -6   8   5   62.19    6.20
  -6   8   5   68.19    9.10
   8  -2   5   70.79    8.20
   3   5  -5   75.79   11.30
   3   5  -5   68.09    8.30
  -8   3  -5   70.49   11.70
  -8   3  -5   71.39   10.50
   5  -8  -5   73.49    9.60
   8  -3   5   75.49    7.50
  -5   8   5   60.09    7.60
  -5   8   5   73.79    6.30
  -3  -5   5   71.49    7.20
   4   4  -5   -7.00    7.60
  -8   4  -5   -3.00    6.80
  -8   4  -5   -1.60    8.90
   4   4  -5    4.30    4.10
   4  -8  -5   -1.20    4.70
  -4   8   5    1.40    4.70
  -4   8   5   -3.40    3.00
  -4  -4   5    2.20    3.10
   8  -4   5   -1.70    3.60
   5   3  -5   85.79   12.80
  -8   5  -5  109.89   12.60
  -8   5  -5   64.89   11.70
   3  -8  -5   75.19    8.60
   5   3  -5   84.79    8.30
   3  -8  -5   80.79   10.30
  -3   8   5   72.09    6.70
  -5  -3   5   62.39    7.00
   8  -5   5   74.09    7.80
   2  -8  -5   61.09    8.50
   6   2  -5   74.79    8.40
  -8   6  -5   75.69   11.90
   6   2  -5   83.59   11.80
  -8   6  -5   70.59    9.50
   2  -8  -5   65.69    9.10
   8  -6   5   62.19    7.60
  -2   8   5   64.59    6.50
  -6  -2   5   65.79    6.60
  -8   7  -5   80.19   12.80
   1  -8  -5   67.09   11.40
   7   1  -5   99.79   12.20
  -8   7  -5   91.39   12.40
   7   1  -5   86.49    8.80
   1  -8  -5   76.89    8.80
  -1   8   5   75.09    7.40
   8  -7   5   85.09    8.20
  -7  -1   5   93.99    7.40
  -7  -1   5   85.79   10.40
  -8   8  -5    9.10    6.40
  -8   8  -5   12.00   11.90
   0  -8  -5   12.70    7.40
   8   0  -5   11.10    7.20
   8   0  -5   17.70    5.40
   0   8   5   17.40    4.60
   8  -8   5   18.80    4.70
  -8   0   5   14.20    4.40
  -8   0   5   16.80    6.40
   9  -1  -5   14.00    6.80
  -8   9  -5    2.30    7.10
  -8   9  -5    1.40   13.00
   9  -1  -5    6.40    5.10
  -1  -8  -5   -2.00    7.70
  -9   1   5   -0.30    6.90
   8  -9   5    5.00    4.30
  -9   1   5    0.00    4.10
   1   8   5    5.50    5.10
   1   8   5    1.10    3.70
  -2  -8  -5   -2.80    8.60
  -8  10  -5   12.10   13.10
  -8  10  -5   11.20    6.90
  10  -2  -5    4.10    5.10
  10  -2  -5    9.50    7.20
   2   8   5    7.10    4.70
   2   8   5  -11.50    5.40
 -10   2   5   -2.40    4.20
   8 -10   5    3.30    4.80
 -10   2   5    1.00    7.30
  11  -3  -5   20.10    8.70
  -8  11  -5   36.40    8.80
  -3  -8  -5   25.30   10.70
  11  -3  -5   25.30    6.40
  -8  11  -5   23.10   16.70
 -11   3   5   27.30    5.80
   3   8   5   27.70    5.80
   8 -11   5   22.80    6.50
 -11   3   5   33.70    9.20
  12  -4  -5    5.10    6.40
  -8  12  -5   12.80    9.00
  -4  -8  -5    8.40   11.70
  12  -4  -5    2.80    8.50
  -8  12  -5   10.30   17.70
   4   8   5  -11.20    6.90
   4   8   5   -4.70    5.70
 -12   4   5   12.10    5.30
 -12   4   5   -0.30    9.50
   8 -12   5   -0.80    6.20
  -5  -8  -5   15.20   13.20
  -8  13  -5   58.29   21.10
  13  -5  -5   39.60   10.90
  13  -5  -5   18.20    7.50
  -8  13  -5   28.50    9.40
 -13   5   5   49.20   11.40
 -13   5   5   18.70    6.40
   8 -13   5   17.80    7.90
   5   8   5   28.00    7.60
   5   8   5    2.20    8.50
  14  -6  -5   44.50   12.90
  -8  14  -5   39.60   11.30
  -6  -8  -5   60.89   17.30
  -8  14  -5   20.50   24.80
 -14   6   5   28.30    6.90
   6   8   5   25.20    7.70
   6   8   5   11.00    9.80
   8 -14   5   27.60    9.40
 -14   6   5   31.70   12.40
  -8  15  -5   31.30   12.00
  15  -7  -5   28.10   13.60
  -8  15  -5   65.19   26.70
  -7  -8  -5   25.00   20.00
   7   8   5    5.60   10.40
 -15   7   5   29.00   12.70
   7   8   5   24.90    8.30
  14  -9  -5   67.79   13.20
  -5  14  -5   33.50   10.90
  -5  14  -5   63.69   26.70
  -9  -5  -5   60.29   12.20
  -9  -5  -5   51.89   20.50
   5 -14   5   65.69    9.80
 -14   9   5   69.09    8.40
 -14   9   5   60.29   12.30
   5 -14   5   58.89    9.40
  13  -9  -5   17.80   10.30
  -4  13  -5   20.70   22.00
  -9  -4  -5   27.20   15.00
   4 -13   5    5.20    6.60
   4 -13   5   16.70    7.90
 -13   9   5   10.00    9.80
   9   4   5   11.40    8.40
 -13   9   5    6.40    6.20
  -3  12  -5   24.80   19.90
  12  -9  -5    7.40    8.40
  -3  12  -5    6.80    7.20
  -9  -3  -5   12.40   13.30
   3 -12   5    5.10    9.20
   9   3   5    6.80    7.10
 -12   9   5    2.20    4.90
   3 -12   5    9.30    7.00
 -12   9   5  -12.70    9.40
  -2  11  -5   66.49   18.00
  11  -9  -5   56.99    9.80
  -9  -2  -5   59.29   15.00
  -2  11  -5   70.59   11.50
   2 -11   5   72.29   10.20
   9   2   5   79.09   12.10
 -11   9   5   75.99    8.40
   2 -11   5   76.59   10.80
 -11   9   5   56.49   10.10
  -9  -1  -5   88.69   14.50
  -1  10  -5   88.49   17.10
  10  -9  -5  106.99   13.70
  -1  10  -5   77.59   10.80
 -10   9   5  126.29   13.30
   1 -10   5  112.09   10.50
   1 -10   5   96.09   12.70
   9   1   5   74.69   11.90
 -10   9   5  106.19    8.40
  -9   0  -5   63.29   11.30
   0   9  -5   83.99   15.00
  -9   0  -5   65.99    9.10
   9  -9  -5   74.69   10.10
   0   9  -5   58.99    7.50
   0  -9   5   58.49    7.00
   9   0   5   57.39    7.80
  -9   9   5   67.89   11.40
  -9   9   5   65.39    7.30
   1   8  -5   -3.30   10.90
   8  -9  -5    6.10    6.00
  -9   1  -5   -3.90    8.20
  -9   1  -5    1.90    4.40
   1   8  -5    0.30    4.90
   9  -1   5   -5.90    4.70
  -1  -8   5   -4.20    4.50
   9  -1   5    7.30    5.00
  -8   9   5  -11.10    5.80
  -8   9   5    6.00    3.60
  -9   2  -5   10.50    8.20
   2   7  -5   -2.60   10.40
   7  -9  -5   -3.30    5.60
   2   7  -5   -4.10    4.60
   9  -2   5    2.10    4.60
  -2  -7   5    4.40    4.40
  -7   9   5    4.50    5.60
  -7   9   5   -4.10    3.20
  -9   3  -5   40.90   11.90
   3   6  -5   31.40   10.00
   6  -9  -5   23.70    6.60
  -9   3  -5   17.30    8.80
   3   6  -5   27.20    5.90
  -3  -6   5   23.90    5.10
   9  -3   5   22.00    5.20
  -6   9   5   22.10    3.90
  -6   9   5   32.20    6.40
   4   5  -5    5.30    4.90
   4   5  -5  -15.80    8.50
   5  -9  -5    6.50    5.40
  -9   4  -5   -3.70    7.50
  -9   4  -5   -3.70   10.50
  -5   9   5   -0.50    5.50
  -5   9   5   -3.20    3.30
   9  -4   5    2.90    4.10
  -4  -5   5   -1.90    4.10
   5   4  -5   11.60    8.50
   5   4  -5   -2.80    4.60
  -9   5  -5   16.20    7.40
   4  -9  -5    2.10    5.60
  -9   5  -5   -4.50   11.40
   9  -5   5   -1.10    4.20
  -4   9   5    0.90    5.30
  -5  -4   5    3.50    3.80
  -4   9   5   -2.70    3.60
  -9   6  -5   18.70    7.50
   6   3  -5   32.50    5.70
  -9   6  -5   12.00   11.90
   3  -9  -5   16.20    6.20
   6   3  -5   16.70    8.60
   3  -9  -5   28.40    6.70
  -3   9   5   23.60    4.20
   9  -6   5   16.60    4.50
  -6  -3   5   23.50    4.80
   7   2  -5    8.90    7.90
   7   2  -5   11.50    5.00
  -9   7  -5   -3.20   12.00
   2  -9  -5   -2.30    5.30
  -9   7  -5   -9.00    6.90
   2  -9  -5    1.00    6.60
  -2   9   5    3.80    3.60
   9  -7   5    1.50    4.30
  -7  -2   5   -0.30    6.00
  -7  -2   5    2.10    3.90
   8   1  -5   -0.40    5.30
   8   1  -5    5.40    8.20
   1  -9  -5   -0.80    5.40
  -9   8  -5   -6.00   12.90
  -9   8  -5   -2.90    7.00
   1  -9  -5    3.10    6.90
   9  -8   5    7.60    4.50
  -1   9   5    4.20    3.80
  -8  -1   5    0.40    3.90
  -8  -1   5    4.60    6.50
  -9   9  -5   69.19   16.30
   0  -9  -5   60.39   11.10
  -9   9  -5   63.59    9.80
   9   0  -5   59.69    9.50
   9   0  -5   65.39   10.10
  -9   0   5   66.59    9.20
   9  -9   5   55.79    9.30
  -9   0   5   51.69    6.60
   0   9   5   69.39    8.20
  -1  -9  -5   90.89   13.50
  -9  10  -5   72.09   17.40
  10  -1  -5   89.59   11.10
  10  -1  -5  109.69   11.50
  -9  10  -5  102.29   14.60
 -10   1   5   97.19   14.50
   1   9   5  106.99    9.90
   1   9   5   94.69   10.50
   9 -10   5   88.79   10.50
 -10   1   5   98.29    9.60
  -2  -9  -5   69.29   13.70
  11  -2  -5   73.09   11.30
  11  -2  -5   92.49   14.10
  -9  11  -5   72.89   19.30
  -9  11  -5   59.69   10.20
 -11   2   5   58.09   10.70
   9 -11   5   75.29   10.90
   2   9   5   70.69   11.00
   2   9   5   66.29   10.10
 -11   2   5   61.09    9.10
  12  -3  -5   11.10    6.80
  -9  12  -5   -8.30    8.90
  12  -3  -5    1.90    9.20
  -3  -9  -5    1.50   10.80
  -9  12  -5    4.80   18.20
   9 -12   5    2.30    6.10
   3   9   5    0.70    6.90
 -12   3   5   -4.20    5.80
 -12   3   5    8.50   10.10
   3   9   5    3.00    6.00
  13  -4  -5   16.20   10.70
  -9  13  -5    6.60   21.00
  -4  -9  -5   -1.60   13.60
  13  -4  -5   18.20    8.10
  -9  13  -5   15.20    9.80
   4   9   5    8.30    6.50
   9 -13   5   -2.00    7.40
   4   9   5    7.60    7.90
 -13   4   5    2.80   11.20
 -13   4   5   14.70    6.50
  -9  14  -5   50.89   23.30
  -5  -9  -5   23.00   17.20
  14  -5  -5   46.00   12.20
  14  -5  -5   54.39    9.50
  -9  14  -5   40.00   11.60
 -14   5   5   35.40    7.60
 -14   5   5   52.99   13.10
   5   9   5   40.20    9.00
   5   9   5   44.90    9.50
   9 -14   5   28.90    9.60
  -4  14  -5   23.00   26.30
 -10  -4  -5   -8.00   17.30
  14 -10  -5   20.10   13.70
 -10  -4  -5   21.30   10.40
   4 -14   5   28.90    9.00
 -14  10   5   20.50   13.60
  13 -10  -5    8.80    9.80
  -3  13  -5   14.70   22.50
 -10  -3  -5   -8.50    8.60
  -3  13  -5   14.10    8.00
 -10  -3  -5   -3.90   15.30
   3 -13   5    7.90    7.60
 -13  10   5   -2.50   10.00
  10   3   5   -2.00    8.10
 -13  10   5    3.60    5.50
 -10  -2  -5   78.89   15.90
  -2  12  -5  122.29   21.60
  12 -10  -5   82.59   13.10
  -2  12  -5   72.39   12.40
 -10  -2  -5   71.99    9.90
  10   2   5   87.79   14.50
   2 -12   5   82.39   12.60
 -12  10   5  106.69    9.50
 -12  10   5   85.79   12.30
   2 -12   5   59.69   11.10
 -10  -1  -5    5.80    6.60
  -1  11  -5    3.10    6.50
  -1  11  -5   34.40   17.20
 -10  -1  -5   22.10   12.40
  11 -10  -5    5.70    8.40
   1 -11   5   14.50    6.90
  10   1   5    8.10    6.90
 -11  10   5   27.50    9.00
 -11  10   5   15.20    5.10
   1 -11   5    2.40    9.10
 -10   0  -5   18.20    6.30
 -10   0  -5    1.00   11.90
   0  10  -5    8.90   15.10
   0  10  -5   21.40    6.80
  10 -10  -5   16.80    7.70
   0 -10   5   13.10    6.50
 -10  10   5   16.60    7.70
 -10  10   5   15.20    5.10
  10   0   5    7.30    6.70
   0 -10   5   19.50    8.70
   1   9  -5   88.09   11.50
   1   9  -5   90.69   16.20
   9 -10  -5  104.99   13.60
 -10   1  -5   94.59   14.40
  -9  10   5   96.29    8.50
  -9  10   5   75.99   12.90
  -1  -9   5   81.19   10.70
  10  -1   5   95.59   12.10
   8 -10  -5    6.60    7.60
   2   8  -5    1.90   12.40
 -10   2  -5   13.60    9.10
   2   8  -5   -2.60    5.70
  -2  -8   5    0.50    5.30
  -8  10   5    3.60    6.90
  10  -2   5    6.10    6.10
  10  -2   5    6.50    5.40
  -8  10   5    2.60    4.00
 -10   3  -5    6.90    8.80
   3   7  -5   10.90    5.70
   7 -10  -5   16.00    7.00
   3   7  -5   15.50   12.20
  -7  10   5   15.00    6.80
  10  -3   5   14.70    5.40
  10  -3   5    8.90    6.00
  -7  10   5   12.30    4.50
  -3  -7   5   21.10    5.70
   4   6  -5   41.50   12.50
   6 -10  -5   40.00    7.90
   4   6  -5   40.90    6.70
 -10   4  -5   36.30   10.00
  10  -4   5   32.90    6.00
  -6  10   5   42.80    5.80
  -4  -6   5   37.00    6.40
  -6  10   5   26.40    7.80
   5   5  -5    6.30    5.60
 -10   5  -5   19.70    8.50
   5 -10  -5    7.00    6.20
 -10   5  -5  -10.50   12.30
   5   5  -5  -13.10   10.70
  10  -5   5    6.10    4.40
  -5  10   5   -8.40    3.70
  -5  10   5   -0.40    6.20
  -5  -5   5    1.80    4.40
   6   4  -5   35.30   11.30
   6   4  -5   38.00    6.40
 -10   6  -5   30.30    9.00
   4 -10  -5   36.50    7.50
 -10   6  -5   30.90   14.00
   4 -10  -5   36.90    7.30
  -6  -4   5   36.20    5.70
  10  -6   5   26.00    6.00
  -4  10   5   37.10    5.50
 -10   7  -5    1.50   13.20
   3 -10  -5   10.50    6.70
 -10   7  -5    2.20    7.90
   7   3  -5    5.00    9.80
   7   3  -5   15.50    6.10
   3 -10  -5    6.40    7.70
  -3  10   5   15.10    4.40
  10  -7   5   12.70    5.10
  -7  -3   5   17.20    6.90
  -7  -3   5   10.80    4.80
 -10   8  -5   -2.00    7.40
   8   2  -5    6.20    5.60
   2 -10  -5   -7.30    7.60
 -10   8  -5   -3.10   14.70
   8   2  -5   -4.40    8.40
   2 -10  -5   -2.90    6.20
  -8  -2   5    3.60    7.40
  10  -8   5   -4.50    4.90
  -8  -2   5   -2.30    4.50
  -2  10   5    4.60    4.10
   1 -10  -5  104.09   14.80
   9   1  -5   93.29   11.30
 -10   9  -5  124.49   15.10
   9   1  -5   85.69   11.30
 -10   9  -5   93.39   17.40
  -1  10   5  100.29    9.60
  -9  -1   5   91.49   14.30
  10  -9   5   77.39   10.60
  -9  -1   5   90.49    9.60
 -10  10  -5   16.00    8.50
 -10  10  -5    9.80   15.20
  10   0  -5   16.90    7.00
   0 -10  -5   15.50   10.40
  10   0  -5    9.70    9.90
   0  10   5   17.30    5.90
 -10   0   5    3.30    9.20
   0  10   5   12.90    5.20
 -10   0   5   18.60    5.40
  10 -10   5   20.90    6.00
  11  -1  -5   22.10    9.90
  11  -1  -5   14.50    7.00
  -1 -10  -5    7.50   10.90
 -10  11  -5  -14.40   16.20
 -10  11  -5   18.10    8.70
 -11   1   5   11.50   10.40
   1  10   5   15.00    6.10
 -11   1   5   13.50    6.00
   1  10   5    6.20    6.10
  10 -11   5    9.30    6.40
  12  -2  -5   90.69   13.30
  12  -2  -5   82.89   12.70
  -2 -10  -5   74.99   14.60
 -10  12  -5   76.29   12.30
 -10  12  -5   38.80   20.80
   2  10   5   98.99   12.00
 -12   2   5   76.79   10.40
  10 -12   5   91.89   12.60
 -12   2   5   83.79   12.60
   2  10   5   56.49    8.90
  -3 -10  -5    5.60   13.30
  13  -3  -5   37.10   11.50
 -10  13  -5   15.00   19.40
  13  -3  -5    1.80    7.60
 -10  13  -5   -9.00   10.10
  10 -13   5    4.40    7.60
 -13   3   5   27.30   12.10
 -13   3   5   -6.50    6.90
   3  10   5   -2.40    7.70
   3  10   5   -4.10    6.90
  -4 -10  -5   20.60   16.00
  14  -4  -5   31.20   12.20
 -10  14  -5   36.80   23.20
 -10  14  -5   54.19   11.80
  14  -4  -5   26.60    9.50
 -14   4   5   11.70   13.10
   4  10   5   19.80    8.40
   4  10   5   24.50    9.10
 -14   4   5   29.50    7.60
  10 -14   5   29.90    9.00
 -11  -3  -5    9.20   10.50
  -3  14  -5   -6.00   27.10
  14 -11  -5    8.20   12.70
 -11  -3  -5   32.90   17.60
  11   3   5    1.60   10.10
   3 -14   5   -3.10    9.30
 -14  11   5   -3.90   11.10
  -2  13  -5   58.89   10.00
  -2  13  -5   72.39   25.00
  13 -11  -5   68.09   12.70
 -11  -2  -5   70.79   10.40
 -11  -2  -5   61.59   18.90
   2 -13   5   70.69   10.00
 -13  11   5   62.49    8.00
 -13  11   5  103.59   17.50
  11   2   5   62.49   10.50
  12 -11  -5   -0.30   11.10
  -1  12  -5   35.80   21.00
 -11  -1  -5   10.50    7.70
 -11  -1  -5  -18.00   14.70
  -1  12  -5    2.20    7.60
   1 -12   5    0.70    7.20
  11   1   5    4.10    7.60
 -12  11   5    5.00    8.90
 -12  11   5   -3.60    5.60
  11 -11  -5   79.79   11.60
 -11   0  -5   68.69   16.00
   0  11  -5   87.59   12.80
  11   0   5   69.59   10.00
   0 -11   5   78.49    9.60
 -11  11   5   90.69   14.90
 -11  11   5   61.49    9.30
   1  10  -5    5.70    6.70
 -11   1  -5   26.60   13.20
  10 -11  -5   -0.60    8.10
 -11   1  -5   26.10    6.30
   1  10  -5    5.20   16.00
 -10  11   5    7.10    8.30
 -10  11   5    9.50    5.00
  11  -1   5    8.30    6.90
  -1 -10   5    9.20    7.20
 -11   2  -5   49.20   13.30
   9 -11  -5   64.29   10.70
   2   9  -5   68.29    8.90
   2   9  -5   34.10   16.20
  11  -2   5   60.99    8.60
  -9  11   5   64.29    8.60
  11  -2   5   73.39   11.30
  -2  -9   5   64.39    8.40
  -9  11   5   50.59    9.20
 -11   3  -5   23.50   10.90
   3   8  -5   34.80   13.80
   8 -11  -5   30.10    9.30
   3   8  -5   42.40    7.40
  -3  -8   5   28.80    6.40
  11  -3   5   32.40    6.90
  -8  11   5   31.30    8.10
  11  -3   5   27.50    6.70
  -8  11   5   30.00    5.60
 -11   4  -5   26.00   10.50
   4   7  -5   18.50   13.60
   7 -11  -5   17.30    7.90
   4   7  -5   12.20    6.50
  -7  11   5   15.70    8.10
  -7  11   5   11.10    5.00
  -4  -7   5   21.50    5.90
  11  -4   5   11.90    5.80
  11  -4   5   24.00    7.40
   5   6  -5  201.08   22.40
   5   6  -5  226.28   15.30
   6 -11  -5  221.18   16.70
 -11   5  -5  268.07   21.00
  -6  11   5  227.38   16.80
  -6  11   5  220.88   12.70
  -5  -6   5  210.18   13.80
  11  -5   5  207.08   15.30
  11  -5   5  238.18   15.60
   6   5  -5  183.98   21.30
   5 -11  -5  230.28   16.30
 -11   6  -5  213.98   19.40
   6   5  -5  238.68   15.40
  -6  -5   5  212.88   13.10
  11  -6   5  226.98   14.60
  -5  11   5  216.68   17.00
  -5  11   5  223.28   12.70
 -11   7  -5   31.70   15.30
   7   4  -5   19.50    6.60
   7   4  -5   10.00   10.90
 -11   7  -5   18.30    9.80
   4 -11  -5   24.30    8.20
   4 -11  -5   13.90    7.50
  -7  -4   5   23.30    5.70
  11  -7   5    7.80    5.70
  -4  11   5   21.50    5.40
 -11   8  -5   53.29   16.90
 -11   8  -5   17.40    9.50
   3 -11  -5   22.90    8.90
   3 -11  -5   26.20    8.10
   8   3  -5   39.70    6.90
   8   3  -5   25.20   11.50
  -8  -3   5   24.00    5.70
  -8  -3   5    9.10    8.50
  11  -8   5   26.90    6.40
  -3  11   5   26.60    5.50
 -11   9  -5   61.99   10.90
   2 -11  -5   46.30   10.60
   9   2  -5   54.59   12.70
   9   2  -5   66.89   11.10
   2 -11  -5   53.19    9.10
 -11   9  -5   84.89   17.70
  -9  -2   5   58.69    7.40
  -9  -2   5   75.99   10.40
  -2  11   5   79.79    9.60
  11  -9   5   65.59    8.10
 -11  10  -5    3.70    9.50
  10   1  -5   -2.80   11.60
   1 -11  -5   -4.40   10.20
  10   1  -5    0.30    6.70
 -11  10  -5   19.50   17.10
 -10  -1   5    6.90   10.30
 -10  -1   5    2.50    6.10
  -1  11   5   18.10    6.30
  11 -10   5    6.20    6.40
  11   0  -5   91.49   13.50
 -11  11  -5   77.99   12.00
   0 -11  -5   81.09   14.70
  11   0  -5   85.69   12.90
 -11  11  -5  116.39   19.80
 -11   0   5   91.99   10.70
   0  11   5   87.49   11.40
  11 -11   5   72.19    9.40
 -11   0   5   68.09   12.20
  12  -1  -5    1.60    7.80
  -1 -11  -5   -2.70   12.40
 -11  12  -5   31.30   18.60
  12  -1  -5  -16.60   11.80
 -11  12  -5   -0.70    9.60
   1  11   5    5.90    6.30
 -12   1   5   -1.10   11.70
  11 -12   5   13.40    7.40
 -12   1   5   -5.20    6.50
   1  11   5    9.50    7.30
  -2 -11  -5   74.59   18.10
  13  -2  -5   58.49    9.80
  13  -2  -5   57.29   13.90
 -11  13  -5   76.59   12.40
   2  11   5   57.49   10.00
   2  11   5   94.29   14.20
 -13   2   5   62.39    8.60
 -13   2   5   48.80   13.40
  11 -13   5   56.09    9.80
  14  -3  -5   14.20    9.30
  14  -3  -5   23.10   13.80
  -3 -11  -5   20.50   17.20
 -11  14  -5   -4.60   11.40
 -14   3   5   13.30   13.70
  11 -14   5   -7.40   11.50
   3  11   5   30.70    9.60
 -14   3   5   -1.00    8.00
   3  11   5   -7.40    7.70
  11 -14   5    3.10    9.10
  13 -12  -5   10.90   13.10
  -1  13  -5   29.80   26.10
  -1  13  -5   23.40    8.90
 -12  -1  -5   -6.10   18.20
  12   1   5    9.80    9.40
 -13  12   5    6.90    7.30
 -13  12   5   26.90   11.20
   1 -13   5    7.90    9.00
 -12   0  -5   35.40   17.40
  12 -12  -5   24.80   11.70
   0  12  -5   67.79   22.40
  12   0   5   22.60    8.70
 -12  12   5   12.50   10.70
 -12  12   5   24.00    6.70
   0 -12   5   20.40    8.90
   1  11  -5    0.40    7.80
  11 -12  -5   -1.70   10.00
 -12   1  -5    7.30   14.10
   1  11  -5   27.90   19.00
  12  -1   5   -9.90    7.80
  -1 -11   5  -10.10    7.70
 -11  12   5  -10.30    9.50
 -11  12   5   -7.50    5.90
  10 -12  -5   79.09   13.20
 -12   2  -5   76.59   15.10
   2  10  -5   61.89   18.50
   2  10  -5   79.19   10.00
 -10  12   5   87.39   14.60
  12  -2   5   71.49   10.00
  -2 -10   5   81.19   12.60
 -10  12   5   90.69   10.10
   3   9  -5    0.70    7.40
   3   9  -5    2.50   15.90
   9 -12  -5    7.10    9.80
 -12   3  -5   -3.20   12.90
  -9  12   5   -4.10    5.10
  12  -3   5    0.10    7.30
  -3  -9   5   -1.10    6.30
  -9  12   5   -5.40    8.30
  12  -3   5    9.60    7.40
   8 -12  -5   16.70    8.90
   4   8  -5    1.50    7.70
 -12   4  -5   12.60   12.00
   4   8  -5   -0.80   14.70
  -8  12   5  -12.30    8.00
  -4  -8   5    9.90    6.70
  12  -4   5    9.00    6.80
  -8  12   5    1.30    5.20
  12  -4   5   19.90    7.80
 -12   5  -5   18.60   11.20
   7 -12  -5   -3.90    8.50
   5   7  -5   -2.00    7.10
   5   7  -5    3.90   14.60
  12  -5   5   -2.30    8.10
  -7  12   5   -0.50    5.00
  -7  12   5  -11.20    7.60
  12  -5   5   -4.00    6.30
  -5  -7   5    0.00    6.20
 -12   6  -5   -7.00   10.20
   6   6  -5   -7.70   13.50
   6 -12  -5   -2.70    7.80
   6   6  -5   11.50    7.40
  12  -6   5    3.80    6.00
  12  -6   5   -2.30    7.90
  -6  -6   5   -5.70    5.70
  -6  12   5    1.40    4.80
  -6  12   5   -7.60    7.90
   5 -12  -5   10.40    9.30
 -12   7  -5    1.00   10.40
   7   5  -5    9.40    7.00
   5 -12  -5    8.20    8.20
   7   5  -5  -15.20   13.40
  -5  12   5   10.00    5.40
  -7  -5   5   12.60    5.90
  12  -7   5   11.70    8.20
  12  -7   5   10.70    6.20
 -12   8  -5   13.90   10.00
   4 -12  -5    9.80    9.70
   8   4  -5    1.10   13.10
   8   4  -5    7.90    7.50
   4 -12  -5   12.20    8.50
  -8  -4   5    7.40    5.80
  -4  12   5   13.20    5.80
  12  -8   5   13.10    6.20
  12  -8   5   11.70    8.90
   9   3  -5   -8.80   12.80
   3 -12  -5    8.90    7.80
   3 -12  -5   -1.30    9.90
 -12   9  -5    6.70    9.60
   9   3  -5   15.10    7.30
  -3  12   5   11.50    5.90
  12  -9   5    0.60    6.80
  -9  -3   5   14.70    5.90
  12  -9   5    2.30    9.20
  -9  -3   5   -7.40    9.70
   2 -12  -5   81.19   13.30
 -12  10  -5   70.39   12.40
  10   2  -5   72.79   14.80
  10   2  -5   88.89   13.10
  -2  12   5   92.19   11.50
  12 -10   5   69.99   12.50
 -10  -2   5   84.99   10.80
  12 -10   5   82.39   13.10
 -10  -2   5   70.19   12.30
 -12  11  -5   13.90   10.80
   1 -12  -5    2.50   12.70
  11   1  -5    2.70   12.90
  11   1  -5   -6.70    7.70
  -1  12   5    9.10    6.90
 -11  -1   5  -18.00   11.60
  12 -11   5   -2.10    7.60
  12 -11   5   -5.60   10.20
  12   0  -5   18.70    8.60
 -12  12  -5   30.20   11.10
   0 -12  -5   20.60   14.00
  12   0  -5   17.60   13.90
  12 -12   5   23.20   11.70
 -12   0   5   20.10   12.30
 -12   0   5   24.90    7.60
  12 -12   5   12.30    8.20
   0  12   5   31.20    7.80
 -12  13  -5   10.10   12.30
  13  -1  -5   17.70    9.10
  13  -1  -5    0.80   14.60
  -1 -12  -5   -8.90   15.00
  12 -13   5   21.10   12.00
 -13   1   5    8.60   13.30
  12 -13   5    8.20    8.80
 -13   1   5    8.80    7.90
   1  12   5    9.50    8.60
   1  12   5   13.00    7.80
  13 -13  -5   82.39   15.80
 -13   0  -5   68.29   19.70
   0 -13   5   72.69   12.20
 -13  13   5   77.79   14.60
 -13   1  -5    9.90   16.00
   1  12  -5   11.40    9.10
  12 -13  -5   33.40   12.40
 -12  13   5    8.80   11.80
  13  -1   5   13.80    9.60
 -12  13   5   25.40    7.50
  -1 -12   5    6.00    9.80
   2  11  -5   62.89   10.60
  11 -13  -5   86.09   15.00
 -13   2  -5   49.20   15.90
 -11  13   5   66.59    8.70
  -2 -11   5   55.79   10.40
  13  -2   5   42.20   10.20
 -11  13   5   76.09   12.20
 -13   3  -5   16.70   13.80
   3  10  -5    1.90    8.30
  10 -13  -5   -4.90   10.70
 -10  13   5   -2.40    6.70
 -10  13   5    2.20    9.90
  -3 -10   5    3.40    7.60
  13  -3   5   -0.80    8.00
 -13   4  -5   15.00   13.80
   9 -13  -5   17.60   10.80
   4   9  -5   27.70    8.70
  13  -4   5    0.90    8.50
  -9  13   5   -9.80    9.70
  13  -4   5   25.50    8.70
  -4  -9   5   29.70    8.10
  -9  13   5   17.40    6.60
 -13   5  -5   40.40   13.80
   5   8  -5   18.30    8.60
   8 -13  -5   30.60   11.00
  -5  -8   5   35.10    8.00
  13  -5   5   33.50    9.30
  13  -5   5   30.40    8.40
  -8  13   5   30.00    6.40
  -8  13   5   29.60   10.60
   6   7  -5   87.69   13.20
   7 -13  -5   68.69   12.00
 -13   6  -5   62.29   14.20
  13  -6   5   56.59    9.70
  13  -6   5   66.69   10.60
  -6  -7   5   55.99    9.20
  -7  13   5   74.49   10.50
  -7  13   5   68.09   12.80
   7   6  -5   67.49    9.90
   6 -13  -5   77.89   12.00
 -13   7  -5   68.99   13.90
  -7  -6   5   69.09   11.00
  13  -7   5   58.49    9.10
  13  -7   5   63.09   11.10
  -6  13   5   56.99   11.30
  -6  13   5   96.19   11.30
 -13   8  -5   39.80   12.90
   5 -13  -5   20.20   11.80
   5 -13  -5   30.40   10.70
   8   5  -5   40.00    8.40
  13  -8   5   23.60   10.80
  13  -8   5   41.70    7.90
  -5  13   5   34.50    7.70
  -8  -5   5   30.90    7.10
   4 -13  -5   24.70   10.30
 -13   9  -5    4.40   11.80
   9   4  -5    7.40    8.40
   4 -13  -5   14.10   11.00
  13  -9   5   18.10   10.80
  -9  -4   5    9.30    7.10
  -4  13   5   19.00    6.90
  13  -9   5   18.90    7.30
 -13  10  -5   22.30   12.30
  10   3  -5   24.20    8.40
   3 -13  -5    0.50   11.80
  13 -10   5   -6.70    7.60
  13 -10   5   -6.50   10.20
  -3  13   5    6.30    7.10
 -10  -3   5  -13.00    6.60
  11   2  -5   68.79    9.60
   2 -13  -5   63.59   15.00
 -13  11  -5   32.80   13.20
  13 -11   5   63.89   10.20
  -2  13   5   59.99    9.60
  13 -11   5   66.39   12.50
 -11  -2   5   60.09    9.10
 -13  12  -5    2.60   12.20
   1 -13  -5    9.80   14.80
  12   1  -5   14.90    9.30
 -12  -1   5    8.20    7.80
  13 -12   5   14.70    9.00
  13 -12   5   10.60   11.30
  -1  13   5   20.60    8.30
 -13  13  -5   81.09   14.30
   0 -13  -5   83.19   17.80
  13 -13   5   77.89   14.20
   0  13   5   84.59   12.00
 -13   0   5   78.59   11.00
   3  11  -5  -13.00    9.20
 -14   3  -5    1.00   15.90
  11 -14  -5   -3.10   12.10
  14  -3   5  -10.10    9.50
  -3 -11   5    2.90    9.30
 -11  14   5   12.80    7.30
 -11  14   5   14.20   11.70
  10 -14  -5   16.50   12.30
 -14   4  -5   47.90   15.30
   4  10  -5   24.90    9.70
  14  -4   5   17.80    9.40
 -10  14   5   22.30    7.60
 -10  14   5   17.40   11.70
  -4 -10   5   43.90   10.20
   5   9  -5   55.79   10.70
   9 -14  -5   51.79   12.80
 -14   5  -5   66.29   15.80
  -5  -9   5   54.49   10.00
  -9  14   5   54.39    8.40
  -9  14   5   47.70   12.20
  14  -5   5   69.19   11.90
  14  -5   5   43.30   10.50
   6   8  -5   27.00    9.40
 -14   6  -5   29.30   13.80
   8 -14  -5   36.10   12.20
  -6  -8   5   25.70    9.00
  14  -6   5   50.49   10.70
  -8  14   5   51.29   12.30
  14  -6   5   38.60   10.00
   7 -14  -5    7.40   12.00
   7   7  -5   10.90    8.50
 -14   7  -5    5.00   13.80
  14  -7   5   -0.60    8.30
  -7  -7   5   -7.40    7.50
  -7  14   5    9.90    7.10
  -7  14   5    3.10   10.10
  14  -7   5   -0.10   10.30
 -14   8  -5   48.90   14.80
   6 -14  -5   49.30   13.00
   6 -14  -5   45.30   12.30
   8   6  -5   31.70    9.50
  14  -8   5   48.20    9.50
  14  -8   5   32.70   11.30
  -8  -6   5   42.50    8.30
  -6  14   5   46.50    8.70
   5 -14  -5   57.89   15.20
   5 -14  -5   56.49   12.40
 -14   9  -5   45.20   14.50
   9   5  -5   54.99   10.30
  -9  -5   5   49.90    8.90
  -5  14   5   63.99    9.00
  14  -9   5   61.29   12.70
  14  -9   5   53.59   10.10
 -14  10  -5   33.50   12.90
  10   4  -5   27.20   10.00
   4 -14  -5   18.20   14.10
 -10  -4   5   21.50    8.20
  -4  14   5   34.20    8.50
  14 -10   5   40.70    9.40
  14 -10   5   22.60   11.90
   3 -14  -5   10.80   12.90
 -14  11  -5  -19.10   12.80
  11   3  -5   28.50    9.40
  14 -11   5    1.50    8.60
 -11  -3   5    4.90    7.60
  -3  14   5    0.00    8.20
  14 -11   5    1.80   12.30
   8 -15  -5   36.60   13.80
 -15   7  -5   16.70   15.80
  -8  15   5   26.10    9.30
  -7  -8   5    9.40    9.40
  15  -7   5   45.30   12.30
  -8  15   5   27.00   12.60
   7 -15  -5   48.10   13.90
 -15   8  -5   28.80   15.10
   7 -15  -5   26.80   14.30
  -8  -7   5   37.90    8.90
  -7  15   5   44.50    9.30
  15  -8   5   41.70   13.70
   0   0  -6    8.90    4.30
   0   0  -6   11.90    3.30
   0   0   6   16.20    2.40
   0   0   6   12.70    2.20
   0   1  -6  107.99    9.20
  -1   0  -6   89.59    7.60
  -1   0  -6   86.39    8.90
   1  -1  -6  106.79    7.90
   1  -1  -6   77.79    6.40
   0  -1   6   91.09    5.50
   1   0   6   89.69    5.50
   0  -1   6   90.29    4.90
  -1   1   6   88.59    5.20
   1   0   6   80.69    4.60
  -1   1   6   91.09    5.10
  -1   1  -6   95.19    7.10
   0  -1  -6   84.69    7.90
  -1   1  -6   83.09    9.10
   1   0  -6   78.09    8.00
   0  -1  -6   94.29    7.30
   0   1   6   86.89    5.30
  -1   0   6   87.99    5.10
  -1   0   6   86.09    5.00
   0   1   6   87.29    4.90
   1  -1   6   97.99    5.70
   1  -1   6   91.29    4.80
  -1  -1  -6  753.22   32.50
  -1  -1  -6  733.43   29.80
  -1   2  -6  798.52   31.50
   2  -1  -6  790.22   31.20
   2  -1  -6  746.23   29.90
   1  -2   6  795.62   31.20
   1  -2   6  737.63   28.90
  -2   1   6  648.94   30.20
  -2   1   6  799.42   29.30
   1   1   6  752.02   31.00
   1   1   6  727.03   28.90
  -2  -1  -6   17.00    5.20
  -1   3  -6   22.40    6.60
  -2  -1  -6   22.50    5.00
   3  -2  -6   21.60    4.40
   2   1   6   26.90    4.00
   1  -3   6   28.90    3.90
  -3   2   6   24.40    3.30
   2   1   6   25.10    3.00
  -3   2   6   25.10    4.30
   1  -3   6   22.00    3.10
   2  -2  -6  202.88   10.70
   2  -2  -6  213.28   10.40
  -2   0  -6  180.48   11.60
   0   2  -6  187.38   12.50
  -2   0  -6  195.98   12.40
  -2   2   6  189.28    8.80
   2   0   6  202.88    9.70
   2   0   6  187.88    8.40
   0  -2   6  189.08    8.70
   1  -2  -6  776.52   31.80
   1   1  -6  742.23   30.30
   1  -2  -6  722.83   29.40
   1   1  -6  755.12   30.80
  -2   1  -6  778.92   31.00
  -2   1  -6  712.03   32.10
   2  -1   6  747.53   28.50
  -1   2   6  747.73   28.90
   2  -1   6  759.92   31.00
  -1  -1   6  741.73   29.00
   2   0  -6  206.38   11.30
   0  -2  -6  201.18   10.80
  -2   2  -6  176.88   10.70
   0  -2  -6  199.98   11.40
  -2   2  -6  188.48   13.40
   2   0  -6  185.48    9.30
   0   2   6  194.68    8.70
   0   2   6  193.98    9.20
   2  -2   6  198.58    8.40
  -2   0   6  198.58    8.90
   2  -2   6  198.08    9.80
  -2   3  -6   17.20    3.80
  -2   3  -6   32.40    6.70
   3  -1  -6   23.70    4.40
  -1  -2  -6   21.60    4.90
  -1  -2  -6   18.60    4.50
   3  -1  -6   30.10    3.80
  -3   1   6   21.70    3.80
  -3   1   6   22.00    3.20
   1   2   6   24.30    3.10
   2  -3   6   28.10    4.40
   1   2   6   18.80    2.90
   2  -3   6   21.50    3.00
  -2   4  -6  604.44   28.10
   4  -2  -6  630.14   25.60
  -2  -2  -6  616.34   25.60
  -2  -2  -6  647.34   28.70
   2  -4   6  596.24   26.20
   2  -4   6  610.44   24.20
  -4   2   6  630.24   26.00
   2   2   6  623.54   24.30
   2   2   6  600.74   26.10
  -4   2   6  654.23   24.70
  -3  -2  -6   26.40    5.80
  -3  -2  -6   26.40    5.70
   5  -3  -6   27.90    4.80
  -2   5  -6   21.10    7.00
  -5   3   6   28.20    4.00
  -5   3   6   26.50    3.90
   3   2   6   20.40    3.30
   3   2   6   27.00    3.30
   2  -5   6   20.90    2.80
   4  -3  -6  123.59    8.60
  -1   4  -6  128.99   12.90
  -3  -1  -6   95.59   11.10
  -3  -1  -6  118.09   10.60
   1  -4   6  124.79    6.50
  -4   3   6  128.39    7.70
  -4   3   6  127.19    6.80
   3   1   6  124.09    6.40
   3   1   6  127.49    7.70
  -3   0  -6 1992.60   80.79
   0   3  -6 2004.30   74.39
   3  -3  -6 1902.71   72.49
  -3   0  -6 2035.70   73.59
   0   3  -6 1987.90   79.09
   3   0   6 1989.10   79.19
   0  -3   6 1931.11   74.09
   3   0   6 1982.00   73.69
  -3   3   6 1954.40   74.19
  -3   3   6 1989.80   78.99
  -3   1  -6   17.20    4.60
   1   2  -6   28.80    4.50
   2  -3  -6   15.20    3.50
   2  -3  -6   21.20    3.80
  -3   1  -6   31.20    6.00
   1   2  -6   27.90    5.50
  -1  -2   6   30.80    3.40
  -2   3   6   20.80    3.30
   3  -1   6   21.40    2.50
   3  -1   6   27.20    4.30
  -3   2  -6   19.60    4.30
   1  -3  -6   23.10    4.10
   2   1  -6   21.60    5.10
   1  -3  -6   23.80    4.20
  -3   2  -6   25.30    6.20
  -1   3   6   27.20    3.10
   3  -2   6   18.80    2.90
   3  -2   6   18.30    2.50
  -2  -1   6   27.20    3.30
  -3   3  -6 2081.99   75.49
   0  -3  -6 2072.29   81.19
  -3   3  -6 1894.11   80.19
   3   0  -6 2003.60   73.79
   3   0  -6 1992.50   79.39
   0  -3  -6 1915.41   72.69
   0   3   6 1935.61   74.69
   3  -3   6 2085.59   74.19
  -3   0   6 1970.90   74.89
   3  -3   6 2003.20   79.89
  -3   4  -6  141.79   12.20
   4  -1  -6  130.09    7.10
  -1  -3  -6  135.29   10.10
   4  -1  -6  120.49    9.20
  -3   4  -6  120.09    8.20
  -1  -3  -6  121.69    9.00
   3  -4   6  117.09    7.70
   1   3   6  109.09    7.00
  -4   1   6  128.09    6.90
   3  -4   6  114.09    5.90
   1   3   6  121.39    6.40
  -3   5  -6   26.40    4.00
  -3   5  -6   20.50    7.10
  -2  -3  -6   24.20    5.60
  -2  -3  -6   26.70    5.10
   5  -2  -6   22.00    4.60
  -5   2   6   23.00    3.40
   3  -5   6   28.80    3.40
  -5   2   6   20.60    3.00
   2   3   6   21.70    3.50
   2   3   6   24.90    3.90
   3  -5   6   26.40    3.80
  -3   6  -6  386.96   22.20
   6  -3  -6  421.86   18.70
  -3  -3  -6  391.26   21.40
  -3   6  -6  333.37   17.70
   3  -6   6  424.26   18.20
   3   3   6  398.56   16.70
  -6   3   6  413.56   17.00
  -6   3   6  414.46   18.50
   3   3   6  401.16   18.30
   3  -6   6  389.86   16.30
  -3   7  -6    2.20    3.60
  -3   7  -6   11.80    8.80
  -4  -3  -6    3.20    5.90
   7  -4  -6   11.50    5.30
   3  -7   6    2.20    3.00
   4   3   6    6.70    4.10
  -7   4   6    0.80    2.50
  -7   4   6   10.10    4.20
   4   3   6    5.80    2.80
  -4  -2  -6  945.11   42.80
  -2   6  -6  944.81   40.90
   2  -6   6  921.81   36.80
   4   2   6  955.10   39.90
  -6   4   6  968.60   39.80
   4   2   6  969.10   36.80
  -6   4   6  957.80   37.10
   5  -4  -6  752.72   30.00
  -4  -1  -6  751.92   33.90
  -1   5  -6  690.13   32.40
  -4  -1  -6  743.03   30.50
  -1   5  -6  734.43   31.20
   4   1   6  715.23   31.10
  -5   4   6  719.53   28.90
   4   1   6  736.43   28.60
   1  -5   6  736.23   28.90
  -5   4   6  774.42   31.40
  -4   0  -6  904.71   39.70
   4  -4  -6  897.31   35.10
  -4   0  -6  918.41   36.30
   0   4  -6  889.21   37.20
   0   4  -6  845.62   37.40
   0  -4   6  891.51   34.80
  -4   4   6  920.91   37.50
   4   0   6  910.51   37.50
   4   0   6  920.61   34.30
  -4   4   6  878.71   34.70
   1   3  -6  134.99    7.80
  -4   1  -6  110.49   10.30
  -4   1  -6  152.78   11.60
   3  -4  -6  124.79    8.80
   1   3  -6  139.29   12.10
  -3   4   6  134.79    8.50
  -3   4   6  122.99    6.70
  -1  -3   6  127.79    7.00
   4  -1   6  117.59    6.00
   4  -1   6  131.39    7.80
   2   2  -6  622.94   27.10
  -4   2  -6  657.23   28.10
  -4   2  -6  637.04   28.80
   2  -4  -6  590.74   25.30
   2  -4  -6  668.73   28.20
   2   2  -6  649.93   26.80
  -2   4   6  622.54   25.00
   4  -2   6  651.43   27.10
  -2  -2   6  613.64   25.10
  -4   3  -6  120.09    9.80
   1  -4  -6  137.29    9.50
   1  -4  -6  119.59    8.30
   3   1  -6  128.29   10.20
  -4   3  -6  141.19   12.40
   3   1  -6  145.29    7.80
  -3  -1   6  122.69    6.90
   4  -3   6  120.49    7.60
  -1   4   6  117.79    6.60
   4   0  -6  926.81   35.70
   4   0  -6  908.91   36.70
   0  -4  -6  848.32   34.30
  -4   4  -6  858.41   38.00
   0  -4  -6  899.11   38.90
  -4   4  -6  918.41   37.80
  -4   0   6  892.71   34.90
   0   4   6  895.41   34.70
   4  -4   6  919.51   37.30
  -1  -4  -6  716.43   33.10
   5  -1  -6  721.33   30.20
  -4   5  -6  757.92   33.10
  -1  -4  -6  675.83   28.50
  -4   5  -6  700.33   31.40
   5  -1  -6  742.43   29.80
  -5   1   6  719.93   28.80
   1   4   6  722.93   28.70
   1   4   6  730.03   30.60
  -5   1   6  776.02   30.30
   4  -5   6  769.12   31.10
  -2  -4  -6  825.32   41.10
   6  -2  -6  921.71   36.90
  -4   6  -6  910.01   39.00
   4  -6   6  923.91   38.90
   2   4   6  950.30   36.20
  -6   2   6  962.10   36.40
  -6   2   6 1003.20   38.70
   2   4   6  940.91   38.80
  -4   7  -6    7.60    9.30
   7  -3  -6   12.40    5.00
  -3  -4  -6    5.30    6.20
  -4   7  -6   -6.00    3.70
   3   4   6    7.50    3.10
  -7   3   6    0.70    2.70
   4  -7   6    5.20    2.60
   4  -7   6    3.00    4.10
  -7   3   6    2.50    4.00
   3   4   6   11.20    3.90
   8  -4  -6  367.86   18.60
  -4   8  -6  347.97   17.50
  -4  -4  -6  359.96   22.00
  -4   8  -6  323.47   23.90
  -8   4   6  389.06   18.40
   4  -8   6  355.76   15.50
   4   4   6  363.56   16.10
   4   4   6  384.66   18.30
   4  -8   6  337.17   17.50
  -8   4   6  346.67   16.00
  -4   9  -6   26.50    5.50
  -4   9  -6   34.70   12.30
   9  -5  -6   30.10    7.10
  -5  -4  -6   42.80   10.00
   5   4   6   31.00    5.80
   4  -9   6   37.30    5.10
  -9   5   6   37.10    5.80
  -9   5   6   32.40    6.80
   5   4   6   34.40    5.00
   4  -9   6   39.00    5.40
  -3   8  -6   10.90    4.10
   8  -5  -6   10.80    5.50
  -5  -3  -6   10.40    7.20
  -3   8  -6   14.90   10.90
  -8   5   6    1.60    3.20
   3  -8   6    2.70    3.30
   3  -8   6   10.00    3.60
  -8   5   6   11.10    5.30
   5   3   6    8.10    3.40
   5   3   6    6.40    4.60
  -5  -2  -6 1536.55   67.79
  -2   7  -6 1489.55   64.29
  -2   7  -6 1578.04   63.49
   7  -5  -6 1616.84   60.09
   5   2   6 1623.04   59.89
  -7   5   6 1516.35   59.99
  -7   5   6 1605.54   64.59
   2  -7   6 1652.03   60.19
   5   2   6 1582.14   64.69
  -5  -1  -6   53.59    7.80
  -5  -1  -6   43.40    8.30
   6  -5  -6   47.40    6.50
  -1   6  -6   45.00    6.70
  -1   6  -6   54.19    9.60
  -6   5   6   56.49    7.20
   5   1   6   36.30    4.90
  -6   5   6   36.90    4.60
   1  -6   6   45.40    5.30
   5   1   6   48.90    4.90
   0   5  -6  333.57   20.40
  -5   0  -6  313.57   18.20
   0   5  -6  328.77   15.40
  -5   0  -6  312.17   17.80
   5  -5  -6  309.97   15.40
   5   0   6  307.77   15.10
   5   0   6  304.87   13.20
  -5   5   6  309.47   15.50
   0  -5   6  324.77   14.00
  -5   5   6  313.17   13.70
  -5   1  -6  786.92   32.00
   1   4  -6  701.53   32.20
   1   4  -6  727.33   31.40
   4  -5  -6  740.63   30.00
  -5   1  -6  746.23   34.30
   5  -1   6  744.13   31.70
   5  -1   6  724.03   28.50
  -4   5   6  749.82   29.30
  -1  -4   6  738.73   29.50
  -4   5   6  775.42   32.10
  -5   2  -6   38.60    7.70
   2   3  -6   26.10    7.10
   3  -5  -6   21.10    4.60
  -5   2  -6   26.70    5.20
   2   3  -6   32.70    5.60
  -2  -3   6   25.60    3.40
  -3   5   6   22.50    2.90
   5  -2   6   28.90    4.70
  -3   5   6   21.60    4.20
  -5   3  -6   22.90    6.70
   3   2  -6   21.30    6.20
   2  -5  -6   32.00    5.50
  -5   3  -6   20.10    5.20
   2  -5  -6   21.50    4.30
   3   2  -6   25.30    3.80
  -3  -2   6   28.60    4.00
  -2   5   6   25.00    3.40
   5  -3   6   24.70    3.60
  -5   4  -6  709.23   32.70
   1  -5  -6  749.42   32.70
   1  -5  -6  684.73   28.60
  -5   4  -6  763.42   32.90
   4   1  -6  753.02   30.80
   4   1  -6  764.92   30.60
   5  -4   6  719.53   31.10
  -4  -1   6  731.33   29.10
  -1   5   6  723.83   28.90
  -5   5  -6  327.17   19.40
  -5   5  -6  295.57   16.30
   5   0  -6  317.87   14.90
   5   0  -6  342.27   16.50
   0  -5  -6  313.77   17.30
   0  -5  -6  296.87   14.60
   5  -5   6  325.47   15.40
   0   5   6  308.87   13.80
  -5   0   6  326.77   14.10
   6  -1  -6   51.49    6.50
  -5   6  -6   53.39    8.10
   6  -1  -6   49.00    6.50
  -1  -5  -6   41.00    7.90
  -5   6  -6   34.30   10.00
  -1  -5  -6   41.00    5.30
   1   5   6   46.70    5.20
  -6   1   6   44.50    5.00
  -6   1   6   41.00    4.90
   1   5   6   48.10    6.50
   5  -6   6   39.00    6.30
  -5   7  -6 1496.55   63.99
   7  -2  -6 1587.34   63.99
  -2  -5  -6 1588.14   67.89
   7  -2  -6 1539.35   60.09
  -5   7  -6 1668.43   65.19
  -7   2   6 1663.93   64.49
   2   5   6 1583.34   64.49
   5  -7   6 1610.24   64.89
  -7   2   6 1568.64   60.69
   2   5   6 1566.34   60.69
   8  -3  -6    8.20    5.80
  -5   8  -6   -5.00    4.40
  -5   8  -6    1.40    9.90
  -3  -5  -6    8.50    6.70
   3   5   6    3.00    4.50
  -8   3   6    8.10    4.60
   5  -8   6   -2.00    4.30
  -8   3   6    1.70    3.20
   3   5   6   10.90    3.50
   9  -4  -6   31.70    6.50
  -4  -5  -6   27.80    9.20
  -5   9  -6   31.80    5.80
  -5   9  -6   17.00   11.80
  -9   4   6   26.50    6.40
   4   5   6   47.40    7.00
   5  -9   6   32.00    4.20
   5  -9   6   28.50    5.90
   4   5   6   28.70    5.40
  -9   4   6   25.50    4.60
  -5  10  -6  544.75   33.30
  -5  10  -6  500.05   25.00
  10  -5  -6  554.94   25.90
  -5  -5  -6  528.95   31.20
   5 -10   6  559.44   22.80
   5 -10   6  513.35   25.30
 -10   5   6  545.55   26.90
   5   5   6  526.35   25.60
 -10   5   6  541.55   22.90
   5   5   6  533.05   23.50
  -5  11  -6   18.20   16.20
  11  -6  -6   18.50    8.30
  -6  -5  -6   26.50   11.60
  -5  11  -6    8.40    7.30
 -11   6   6   16.80    8.10
   5 -11   6   16.10    6.70
   5 -11   6   11.70    5.70
   6   5   6   15.00    5.70
   6   5   6   18.20    6.40
 -11   6   6    4.40    4.70
  -4  10  -6  218.68   13.90
  10  -6  -6  219.58   16.20
  -4  10  -6  205.88   26.00
  -6  -4  -6  242.18   20.80
 -10   6   6  233.48   12.10
   6   4   6  247.38   15.50
   4 -10   6  236.58   13.30
 -10   6   6  214.08   16.30
   6   4   6  239.88   13.10
  -6  -3  -6  439.46   27.10
  -3   9  -6  400.96   20.30
   9  -6  -6  442.06   22.00
  -3   9  -6  440.86   29.10
   6   3   6  451.45   22.10
  -9   6   6  453.85   18.90
   6   3   6  443.36   19.30
   3  -9   6  454.65   19.90
  -9   6   6  421.16   22.60
   8  -6  -6  574.54   25.80
  -2   8  -6  535.65   30.80
  -6  -2  -6  560.64   30.80
  -2   8  -6  542.35   25.80
   6   2   6  594.04   23.50
   6   2   6  592.94   26.60
  -8   6   6  598.24   26.90
  -8   6   6  548.35   23.40
   2  -8   6  582.24   24.10
  -1   7  -6   36.50   10.50
   7  -6  -6   36.80    6.50
  -1   7  -6   43.60    7.00
  -6  -1  -6   43.80    8.50
  -7   6   6   35.00    5.40
   1  -7   6   51.69    6.50
   6   1   6   31.20    5.40
  -7   6   6   30.60    5.90
   6   1   6   30.40    3.90
   0   6  -6  828.82   36.10
  -6   0  -6  796.42   33.90
   6  -6  -6  782.92   32.90
   0   6  -6  783.42   34.40
  -6   0  -6  778.12   38.20
  -6   6   6  821.12   31.90
   0  -6   6  830.62   32.20
   6   0   6  799.12   34.70
   6   0   6  799.22   31.30
  -6   6   6  847.22   35.10
  -6   1  -6   35.60    7.40
   5  -6  -6   54.09    7.90
   1   5  -6   51.79    6.90
   1   5  -6   46.10    9.00
  -6   1  -6   47.10    8.50
  -5   6   6   42.40    5.60
   6  -1   6   37.70    4.20
   6  -1   6   48.10    6.50
  -5   6   6   48.90    4.90
  -1  -5   6   49.80    5.60
  -6   2  -6  946.01   39.50
   4  -6  -6  925.71   36.90
   2   4  -6  996.20   39.30
  -6   2  -6  983.20   42.30
   2   4  -6  923.71   39.20
  -4   6   6  938.71   36.40
   6  -2   6  843.82   39.30
  -4   6   6  952.30   40.00
  -2  -4   6  940.71   36.90
   3  -6  -6  379.86   18.20
  -6   3  -6  404.96   21.30
   3   3  -6  410.46   20.90
   3   3  -6  398.86   18.50
  -6   3  -6  398.56   22.40
   6  -3   6  423.66   18.90
  -3   6   6  399.36   17.00
  -3  -3   6  404.06   17.40
  -3   6   6  406.66   19.50
   4   2  -6  965.20   36.80
   4   2  -6  959.20   37.50
   2  -6  -6  900.81   34.80
  -6   4  -6  982.80   40.10
   2  -6  -6  907.61   39.20
  -6   4  -6  924.41   38.70
  -4  -2   6  758.52   35.00
   6  -4   6  775.32   37.40
  -6   5  -6   47.00    7.00
   5   1  -6   45.80    6.70
  -6   5  -6   61.69   10.20
   1  -6  -6   47.70    7.10
   1  -6  -6   45.40    5.70
   5   1  -6   47.40    7.40
  -1   6   6   40.70    5.30
  -5  -1   6   42.70    5.30
   6  -5   6   44.00    6.40
  -6   6  -6  755.72   36.70
   6   0  -6  852.51   33.30
   6   0  -6  796.92   33.80
  -6   6  -6  850.91   35.70
   0  -6  -6  784.62   36.60
   0  -6  -6  746.13   30.90
   0   6   6  784.32   31.80
   6  -6   6  805.72   34.10
  -6   0   6  813.82   32.10
   7  -1  -6   33.80    6.90
  -6   7  -6   33.40    5.70
   7  -1  -6   37.30    5.10
  -6   7  -6   35.70   10.20
  -1  -6  -6   27.50    7.50
  -7   1   6   34.60    5.30
   1   6   6   33.70    4.90
  -7   1   6   28.20    4.50
   1   6   6   36.70    5.70
   6  -7   6   30.30    4.60
  -6   8  -6  510.25   30.90
  -6   8  -6  563.94   26.30
   8  -2  -6  557.24   25.00
  -2  -6  -6  543.45   29.30
   8  -2  -6  587.84   25.40
  -8   2   6  552.44   23.50
  -8   2   6  595.24   25.80
   2   6   6  594.24   25.60
   6  -8   6  559.84   25.50
   2   6   6  549.54   23.70
  -6   9  -6  398.66   21.30
   9  -3  -6  448.16   20.70
  -6   9  -6  464.85   28.60
  -3  -6  -6  421.46   25.30
   9  -3  -6  425.06   21.90
  -9   3   6  452.25   21.80
  -9   3   6  448.26   19.20
   6  -9   6  429.26   21.10
   3   6   6  430.06   21.20
   3   6   6  438.56   19.50
  -6  10  -6  232.98   25.20
  10  -4  -6  243.48   16.40
  -4  -6  -6  238.18   20.90
  -6  10  -6  173.18   15.20
   6 -10   6  207.08   14.30
   4   6   6  222.58   15.00
   4   6   6  224.88   13.10
 -10   4   6  219.78   12.10
 -10   4   6  240.78   15.80
  -5  -6  -6   10.70   10.60
  -6  11  -6   11.40   16.20
  11  -5  -6   34.00    8.70
   5   6   6    9.50    7.10
   5   6   6   27.90    6.00
 -11   5   6   13.50    8.00
   6 -11   6   14.20    5.40
 -11   5   6    3.90    4.70
   6 -11   6    7.70    6.70
  -6  -6  -6   39.10   13.20
  -6  12  -6   37.30   19.30
  12  -6  -6   17.00    9.70
  -6  12  -6    5.60    8.30
 -12   6   6    5.10    9.40
   6   6   6   17.00    6.50
 -12   6   6   20.60    5.50
   6   6   6   -4.50    8.20
   6 -12   6   14.10    7.60
   6 -12   6   12.10    5.90
  -6  13  -6   41.10    9.90
  -6  13  -6   25.10   22.60
  13  -7  -6   34.20   11.70
  -7  -6  -6   30.60   15.80
   7   6   6   18.10    7.30
   7   6   6   13.90    9.10
   6 -13   6   34.20    9.80
 -13   7   6   40.30   11.30
  -5  12  -6   15.60   18.80
  12  -7  -6   -3.80    8.40
  -5  12  -6   10.70    7.90
  -7  -5  -6   -4.30   12.90
   5 -12   6  -10.50    6.80
   7   5   6    5.70    7.70
   5 -12   6    1.50    6.10
 -12   7   6   17.80    8.90
 -12   7   6    5.60    4.90
   7   5   6   -5.80    5.90
  -4  11  -6  350.86   30.00
  -7  -4  -6  290.97   26.00
  11  -7  -6  299.47   19.90
   4 -11   6  294.37   16.50
 -11   7   6  316.67   15.10
   7   4   6  306.37   18.80
 -11   7   6  290.07   20.40
   7   4   6  321.07   16.20
  -3  10  -6   16.20   14.30
  -7  -3  -6   10.30   10.00
  10  -7  -6    7.90    7.00
  -3  10  -6   13.40    5.80
 -10   7   6   -7.10    7.00
   7   3   6    3.20    4.60
 -10   7   6    8.50    4.10
   7   3   6    4.40    5.80
   3 -10   6   10.30    5.40
  -2   9  -6    6.60    5.00
   9  -7  -6    4.90    6.10
  -2   9  -6    3.00    4.90
  -2   9  -6   -5.10   12.30
  -7  -2  -6   16.60    9.10
  -9   7   6    4.90    3.80
   2  -9   6    4.60    4.60
   7   2   6    4.80    5.20
   7   2   6   -0.10    4.20
  -9   7   6    3.80    6.20
   8  -7  -6  494.25   23.90
  -1   8  -6  501.45   23.90
  -1   8  -6  487.45   29.10
  -7  -1  -6  548.35   29.40
  -8   7   6  514.85   25.10
  -8   7   6  520.35   21.60
   1  -8   6  507.65   22.50
   7   1   6  526.95   24.60
   7   1   6  527.95   21.40
   7  -7  -6   19.50    6.30
  -7   0  -6   18.80    8.20
   0   7  -6    6.10    4.50
   0   7  -6   14.30    9.90
  -7   7   6    8.60    3.30
  -7   7   6   -2.30    5.30
   0  -7   6    4.90    4.10
   7   0   6    7.80    4.30
   7   0   6   10.80    3.30
  -7   1  -6   36.80    8.50
   1   6  -6   29.30    5.10
   1   6  -6   36.30    9.90
   6  -7  -6   30.40    6.00
  -7   1  -6   32.30    8.70
   7  -1   6   28.30    4.60
  -6   7   6   33.20    5.30
   7  -1   6   35.10    5.20
  -1  -6   6   32.30    4.80
  -6   7   6   33.40    5.80
  -7   2  -6 1608.44   67.89
   2   5  -6 1557.84   64.19
   2   5  -6 1578.64   62.19
  -7   2  -6 1567.54   61.49
   5  -7  -6 1508.85   59.39
  -5   7   6 1572.54   59.99
  -2  -5   6 1599.14   60.59
  -5   7   6 1598.44   65.19
   7  -2   6 1573.14   64.59
   4  -7  -6    2.90    4.50
   3   4  -6    8.50    4.00
   3   4  -6    6.50    8.00
  -7   3  -6   10.80    6.20
  -7   3  -6   12.00    8.30
  -4   7   6    2.40    4.50
  -3  -4   6    5.70    3.50
  -4   7   6    6.80    3.00
   7  -3   6    5.60    3.50
   4   3  -6   -1.10    7.30
   3  -7  -6    7.10    4.60
  -7   4  -6    6.80    8.60
   4   3  -6    2.30    4.20
   3  -7  -6   15.00    5.20
  -7   4  -6    9.50    6.70
   7  -4   6   -0.50    3.40
  -4  -3   6    3.20    3.00
  -3   7   6   11.30    3.10
  -7   5  -6 1413.46   65.09
   2  -7  -6 1554.54   65.59
   2  -7  -6 1561.44   58.19
   5   2  -6 1657.73   63.49
  -7   5  -6 1642.44   63.09
   5   2  -6 1620.04   59.99
  -5  -2   6 1530.15   59.79
  -2   7   6 1491.95   59.39
   7  -5   6 1534.75   63.69
  -7   6  -6   36.90   10.30
  -7   6  -6   27.60    7.00
   6   1  -6   36.00    7.50
   1  -7  -6   32.50    6.80
   1  -7  -6   33.10    5.20
   6   1  -6   36.60    5.60
  -6  -1   6   33.60    4.60
  -1   7   6   29.30    4.50
   7  -6   6   30.00    4.70
   0  -7  -6   10.00    5.00
   7   0  -6   19.40    7.80
  -7   7  -6   23.10    9.80
   0  -7  -6    8.50    6.40
   7   0  -6   16.00    4.70
  -7   7  -6   17.60    6.80
  -7   0   6   11.00    3.80
  -7   0   6    5.80    5.20
   7  -7   6    6.70    3.70
   0   7   6   11.60    3.70
  -7   8  -6  500.25   29.80
   8  -1  -6  564.34   24.70
   8  -1  -6  538.45   23.80
  -7   8  -6  537.85   26.40
  -1  -7  -6  483.05   27.70
  -8   1   6  550.84   24.70
  -8   1   6  549.54   22.70
   1   7   6  489.65   22.40
   7  -8   6  494.15   24.00
   1   7   6  536.35   24.10
  -7   9  -6   -1.90    6.90
  -7   9  -6   -7.90   11.10
   9  -2  -6   11.90    6.60
   9  -2  -6   -1.90    4.50
  -2  -7  -6   -3.40    7.90
  -9   2   6    5.60    4.00
   2   7   6    4.70    5.40
   7  -9   6    1.50    4.40
  -9   2   6   -1.10    6.00
   2   7   6    8.60    4.20
  -7  10  -6    2.70    6.90
  10  -3  -6   -2.70    5.30
  -3  -7  -6   -4.50    9.60
  10  -3  -6   10.60    7.10
  -7  10  -6    7.20   13.80
   3   7   6    3.10    5.90
   7 -10   6   -0.10    5.20
   3   7   6    7.30    4.50
 -10   3   6    7.00    6.80
 -10   3   6    9.10    4.70
  -4  -7  -6  273.67   24.70
  -7  11  -6  299.57   31.20
  11  -4  -6  301.17   19.50
  -7  11  -6  288.87   19.40
  11  -4  -6  296.27   17.00
 -11   4   6  323.37   15.50
   4   7   6  311.77   16.70
   7 -11   6  313.67   18.20
   4   7   6  295.87   18.60
 -11   4   6  335.57   20.20
  -7  12  -6   13.70    8.30
  -5  -7  -6  -15.40   11.50
  -7  12  -6    1.20   18.30
  12  -5  -6    7.00    9.30
   5   7   6   -2.40    5.90
 -12   5   6   -9.50    5.00
   7 -12   6   -4.40    6.70
 -12   5   6   11.70    8.50
   5   7   6    1.40    7.10
  13  -6  -6   59.99   11.70
  -7  13  -6   19.70   21.80
  -6  -7  -6   59.39   16.30
  -7  13  -6   26.50   10.50
   6   7   6   39.30    8.80
 -13   6   6   36.40    6.80
   6   7   6   34.60    7.40
   7 -13   6   33.70    8.80
 -13   6   6   26.20   10.80
  -7  14  -6   96.39   27.80
  -7  14  -6  145.39   18.80
  -7  -7  -6  131.99   21.30
  14  -7  -6  134.09   20.40
   7   7   6  135.29   13.70
   7   7   6  130.49   17.10
 -14   7   6  100.39   15.20
   7 -14   6  137.29   17.20
 -14   7   6  164.98   12.00
  14  -8  -6   98.89   14.90
  -6  14  -6  113.89   30.30
  -8  -6  -6  124.79   20.40
  -6  14  -6   83.69   13.40
   8   6   6  107.09   12.90
 -14   8   6  119.99   19.40
 -14   8   6  141.79   11.90
   6 -14   6  109.89   13.20
  -5  13  -6  189.58   27.70
  -5  13  -6  168.48   18.20
  -8  -5  -6  226.98   27.80
  13  -8  -6  205.18   20.00
   8   5   6  180.28   18.30
   8   5   6  208.78   14.00
   5 -13   6  206.38   15.50
 -13   8   6  182.28   19.90
 -13   8   6  205.58   13.10
   5 -13   6  184.98   16.20
  -4  12  -6  116.79   22.50
  -4  12  -6  117.19   14.70
  12  -8  -6  122.99   16.60
   4 -12   6  108.69   12.60
 -12   8   6   97.79   16.10
   8   4   6  129.79   14.90
   8   4   6  106.99   10.80
 -12   8   6  147.49   10.80
  -3  11  -6   99.19   19.00
  11  -8  -6   67.99   10.60
  -8  -3  -6   70.09   14.30
  -3  11  -6   61.39    8.30
   3 -11   6   55.39    7.70
 -11   8   6   68.59    8.70
 -11   8   6   50.29   10.10
   8   3   6   51.09    6.80
   8   3   6   84.39   12.20
  10  -8  -6  106.29   13.30
  -8  -2  -6   90.59   15.40
  -2  10  -6  114.59   17.60
  -2  10  -6   92.49   11.50
 -10   8   6  110.99   12.80
   8   2   6   83.69   12.40
   2 -10   6  105.49   10.80
 -10   8   6   95.89    8.80
  -1   9  -6   10.40   13.60
  -1   9  -6   10.30    5.40
  -8  -1  -6   -4.80    9.60
   9  -8  -6    2.40    6.30
   8   1   6   -0.10    5.70
  -9   8   6   -6.30    6.30
  -9   8   6    0.40    3.70
   1  -9   6    7.40    5.10
   8   1   6   -8.80    3.80
   0   8  -6  470.25   22.90
  -8   0  -6  469.45   28.80
   8  -8  -6  437.76   22.90
   0   8  -6  498.45   29.60
  -8   8   6  458.85   24.20
   0  -8   6  471.15   21.70
  -8   8   6  481.15   20.50
   8   0   6  523.65   20.10
   8   0   6  479.55   23.60
   1   7  -6  490.15   28.80
  -8   1  -6  543.65   29.30
   1   7  -6  510.05   23.90
   7  -8  -6  491.45   23.70
  -8   1  -6  495.45   26.90
  -1  -7   6  503.25   22.60
  -7   8   6  509.75   24.90
   8  -1   6  513.85   24.20
   8  -1   6  524.45   20.80
  -7   8   6  512.95   21.50
  -8   2  -6  583.74   30.90
  -8   2  -6  552.04   29.10
   2   6  -6  550.84   25.60
   2   6  -6  555.44   29.70
   6  -8  -6  531.55   25.10
  -6   8   6  592.44   23.60
  -6   8   6  563.94   26.90
   8  -2   6  580.64   25.90
  -2  -6   6  561.84   24.20
   3   5  -6   -1.60    9.30
   3   5  -6   12.50    4.50
   5  -8  -6   12.70    5.60
  -8   3  -6   -8.20    9.00
  -8   3  -6   20.60    7.80
  -5   8   6    6.00    5.60
  -5   8   6    6.70    3.20
  -3  -5   6   12.30    3.90
   8  -3   6    5.40    4.10
   4  -8  -6  293.17   17.60
  -8   4  -6  366.36   22.00
  -8   4  -6  397.46   23.40
   4   4  -6  346.47   18.00
   4   4  -6  389.16   21.70
  -4   8   6  354.16   16.00
  -4  -4   6  363.86   16.70
  -4   8   6  351.76   19.20
   8  -4   6  352.86   17.90
   3  -8  -6   12.90    5.70
   5   3  -6   -1.40    7.90
  -8   5  -6    1.80    9.90
   5   3  -6    7.30    4.70
  -8   5  -6   16.40    7.10
   3  -8  -6    4.90    6.20
  -3   8   6   11.50    3.50
  -5  -3   6    6.10    3.80
   8  -5   6    4.30    4.00
   2  -8  -6  554.64   28.30
   6   2  -6  592.74   27.10
   2  -8  -6  539.65   24.30
   6   2  -6  573.34   25.60
  -8   6  -6  565.94   30.50
  -8   6  -6  547.65   28.30
  -2   8   6  545.65   23.80
  -6  -2   6  573.44   24.00
   8  -6   6  580.74   25.70
  -8   7  -6  518.05   26.20
  -8   7  -6  497.55   29.60
   7   1  -6  503.25   25.10
   1  -8  -6  471.25   21.80
   1  -8  -6  514.85   26.40
   7   1  -6  505.95   23.40
  -1   8   6  491.45   21.60
   8  -7   6  507.45   23.60
  -7  -1   6  507.85   21.80
   8   0  -6  483.15   22.60
  -8   8  -6  474.35   29.70
  -8   8  -6  489.85   25.20
   0  -8  -6  485.65   26.80
   8   0  -6  490.05   24.40
  -8   0   6  473.05   21.10
  -8   0   6  476.75   23.30
   8  -8   6  479.35   22.80
   0   8   6  463.05   21.10
  -1  -8  -6    5.10    8.00
   9  -1  -6    7.00    7.40
   9  -1  -6    6.80    5.10
  -8   9  -6   -2.20    7.30
  -8   9  -6   21.40   13.00
   1   8   6    6.10    4.80
  -9   1   6   -8.70    6.30
   8  -9   6    6.70    4.50
   1   8   6   -2.50    5.60
  -9   1   6    0.20    4.20
  -8  10  -6  106.99   14.00
  10  -2  -6   78.29   10.70
  -8  10  -6   79.29   17.30
  10  -2  -6  125.39   14.50
  -2  -8  -6   82.49   13.10
 -10   2   6   93.39   13.90
   2   8   6  107.19    9.80
   8 -10   6   74.79   10.50
 -10   2   6   91.59    9.00
   2   8   6   74.99   11.20
  11  -3  -6   68.89   10.20
  -3  -8  -6   54.19   11.50
  -8  11  -6   60.89   17.40
  11  -3  -6   56.39    7.80
  -8  11  -6   56.09    9.60
   3   8   6   49.99    8.00
   3   8   6   67.19   10.30
   8 -11   6   53.79    7.90
 -11   3   6   75.19   10.70
 -11   3   6   64.09    9.20
  -8  12  -6  124.79   21.40
  -4  -8  -6  101.89   16.70
  -8  12  -6   93.59   15.90
  12  -4  -6  109.29   13.20
  12  -4  -6  125.69   16.90
   8 -12   6  123.19   13.30
   4   8   6  136.59   12.30
 -12   4   6   97.19   16.60
 -12   4   6  127.59   10.60
   4   8   6  110.39   14.20
  -8  13  -6  154.48   25.80
  -5  -8  -6  195.58   26.10
  -8  13  -6  205.28   18.40
  13  -5  -6  189.68   19.30
 -13   5   6  170.48   12.90
   8 -13   6  171.78   16.20
   5   8   6  178.28   15.00
   5   8   6  170.18   17.30
 -13   5   6  204.58   19.20
  -8  14  -6   93.89   13.80
  14  -6  -6  105.49   14.70
  -6  -8  -6  168.18   27.90
  -8  14  -6  104.59   26.60
 -14   6   6   98.19   14.10
   6   8   6   83.69   11.90
   8 -14   6   87.19   12.10
   6   8   6   81.29   10.70
  14  -9  -6   23.10   12.60
  -9  -5  -6   28.30   18.70
  -5  14  -6  -21.10   26.20
 -14   9   6   21.70    7.20
   5 -14   6   18.60    9.50
   9   5   6  -13.30   10.20
   9   5   6    2.90    7.30
   5 -14   6   18.80    9.00
 -14   9   6   -0.50   12.10
  -4  13  -6   -0.90   22.90
  -9  -4  -6   16.80   15.90
  13  -9  -6    6.30   10.70
   4 -13   6    4.90    7.80
   9   4   6   -4.50    6.50
   4 -13   6    2.80    7.20
 -13   9   6  -16.10   10.10
 -13   9   6   -2.80    6.50
   9   4   6    7.00    8.10
  -3  12  -6  342.87   35.90
  -9  -3  -6  359.56   31.50
  12  -9  -6  375.56   23.40
   9   3   6  374.96   18.20
 -12   9   6  343.47   17.90
   9   3   6  380.56   22.20
 -12   9   6  353.46   23.80
   3 -12   6  341.27   19.80
  11  -9  -6   78.09   11.50
  -2  11  -6   77.29   19.10
  -2  11  -6   77.69   12.20
  -9  -2  -6   65.59   15.60
 -11   9   6   98.69   14.10
   2 -11   6   90.59   11.60
   9   2   6   89.39   13.20
   9   2   6   75.49    9.20
 -11   9   6   88.69    9.10
  -9  -1  -6   -0.60   12.10
  10  -9  -6   -1.20    7.50
  -1  10  -6    6.10   15.40
  -1  10  -6   13.20    5.90
   9   1   6   -2.30    6.50
 -10   9   6   -0.30    4.50
 -10   9   6   -7.00    7.20
   1 -10   6    9.20    6.10
   9   1   6    1.80    4.30
   9  -9  -6  352.26   20.50
   0   9  -6  347.17   19.20
   0   9  -6  369.76   28.50
  -9   0  -6  390.36   26.20
  -9   9   6  321.57   21.00
   9   0   6  374.66   20.40
   0  -9   6  359.96   18.30
   9   0   6  368.26   16.30
  -9   9   6  358.66   16.60
   1   8  -6    4.80   12.10
   8  -9  -6    3.20    6.60
   1   8  -6    4.00    5.40
  -9   1  -6  -11.80    9.30
   9  -1   6    3.30    5.30
  -8   9   6   -5.50    6.10
  -8   9   6    0.30    3.80
  -1  -8   6    2.30    5.10
   2   7  -6   -5.00    5.00
  -9   2  -6    0.20   11.10
   2   7  -6  -18.80   11.20
  -9   2  -6    1.30    8.90
   7  -9  -6    0.80    6.20
  -2  -7   6   -3.80    4.60
  -7   9   6   -7.10    3.80
   9  -2   6    4.70    4.70
  -7   9   6    4.80    5.90
   3   6  -6  433.66   26.50
  -9   3  -6  445.66   26.30
  -9   3  -6  453.35   27.30
   6  -9  -6  432.66   21.60
   3   6  -6  425.66   21.20
   9  -3   6  430.36   21.30
  -6   9   6  449.36   19.30
  -3  -6   6  422.06   19.90
  -6   9   6  425.56   23.00
  -9   4  -6   31.50    9.30
   5  -9  -6   36.40    6.70
   4   5  -6   32.50   10.40
   4   5  -6   32.40    6.60
  -9   4  -6   53.19   13.00
   9  -4   6   23.70    5.60
  -5   9   6   29.70    7.20
  -4  -5   6   33.00    5.40
  -5   9   6   31.30    4.90
  -9   5  -6   26.80    8.70
  -9   5  -6   38.20   12.70
   4  -9  -6   31.50    6.90
   4  -9  -6   41.30    6.80
   5   4  -6   47.80   10.40
   5   4  -6   27.20    6.20
  -4   9   6   29.00    5.00
   9  -5   6   27.30    5.40
  -5  -4   6   29.90    5.30
  -9   6  -6  443.46   24.70
  -9   6  -6  452.65   29.20
   6   3  -6  424.66   21.20
   3  -9  -6  434.96   21.10
   6   3  -6  417.06   23.80
   3  -9  -6  417.66   23.90
   9  -6   6  447.06   21.30
  -3   9   6  430.86   19.60
  -6  -3   6  432.66   19.70
   7   2  -6    4.20    5.30
   2  -9  -6    3.00    7.10
   7   2  -6    2.70    9.10
  -9   7  -6   -2.70   12.60
   2  -9  -6   -1.60    5.80
  -9   7  -6  -11.10    7.30
  -7  -2   6    8.60    4.10
   9  -7   6   -1.10    4.40
  -2   9   6    0.40    3.90
   8   1  -6    2.30    5.40
   1  -9  -6   -4.10    5.80
  -9   8  -6    1.80    7.90
   1  -9  -6    4.30    7.20
   8   1  -6   -0.10    8.90
  -9   8  -6   12.50   12.60
  -8  -1   6    4.80    6.80
  -8  -1   6   -1.00    4.30
  -1   9   6   11.90    4.30
   9  -8   6    5.50    4.80
  -9   9  -6  381.26   22.70
   9   0  -6  360.56   21.80
   0  -9  -6  329.07   23.70
  -9   9  -6  355.36   29.10
   9   0  -6  373.66   19.20
   0   9   6  347.27   17.60
  -9   0   6  370.06   17.60
   9  -9   6  349.47   19.00
  -9   0   6  355.96   20.10
  10  -1  -6   -5.60    9.40
  10  -1  -6    2.10    5.50
  -1  -9  -6   -5.20    9.20
  -9  10  -6    2.80   14.50
  -9  10  -6   10.40    8.80
 -10   1   6    4.10    4.90
   1   9   6   11.30    5.20
   1   9   6    4.40    5.70
   9 -10   6    6.00    5.80
 -10   1   6    6.20    8.50
  -9  11  -6   74.59   10.80
  -9  11  -6   67.29   19.60
  11  -2  -6   76.69   12.10
  11  -2  -6   81.49   12.10
  -2  -9  -6   78.19   13.90
 -11   2   6   81.99   11.70
   2   9   6   91.19   11.10
   2   9   6   69.19    8.60
   9 -11   6   94.59   11.90
 -11   2   6   89.69    9.70
  12  -3  -6  424.06   23.40
  -9  12  -6  278.07   36.00
  12  -3  -6  347.57   20.90
  -3  -9  -6  370.66   28.30
  -9  12  -6  371.46   23.10
 -12   3   6  366.06   18.80
   3   9   6  376.96   19.90
 -12   3   6  372.56   24.20
   3   9   6  324.37   20.80
   9 -12   6  387.16   20.80
  -9  13  -6   32.60   20.80
  -9  13  -6    6.10   10.20
  13  -4  -6   -2.90    8.00
  -4  -9  -6   -4.80   13.60
  13  -4  -6    9.80   10.70
 -13   4   6    2.20    6.50
   9 -13   6   -5.60    7.80
 -13   4   6   -7.20   11.00
   4   9   6    6.00    7.40
   4   9   6   -2.80    8.20
  -9  14  -6    4.80   23.40
  14  -5  -6    1.80   12.20
  -5  -9  -6   20.60   16.80
  -9  14  -6    2.90   11.00
  14  -5  -6    3.20    9.10
   5   9   6   -0.90    9.30
 -14   5   6   19.80   12.10
 -14   5   6   11.30    7.20
   5   9   6   -2.20    7.50
   9 -14   6  -10.70    9.00
 -10  -4  -6   39.90   21.40
  -4  14  -6   64.49   28.50
 -10  -4  -6   65.99   12.50
  14 -10  -6   46.00   13.50
   4 -14   6   61.79   10.50
  10   4   6   34.70   11.00
 -14  10   6   62.29   13.50
 -14  10   6   61.29    8.30
 -10  -3  -6    1.20    9.60
 -10  -3  -6  -12.50   17.70
  -3  13  -6   20.20   24.20
  13 -10  -6    7.00   10.40
   3 -13   6    7.10    8.50
 -13  10   6   21.50   10.70
  10   3   6    7.60    8.90
 -13  10   6    4.50    6.50
  -2  12  -6  169.08   25.20
 -10  -2  -6  128.29   19.40
  12 -10  -6  151.78   18.00
  -2  12  -6  173.08   15.00
 -10  -2  -6  174.38   15.70
   2 -12   6  151.08   15.00
 -12  10   6  173.18   11.90
  10   2   6  166.08   17.00
 -12  10   6  177.28   17.70
  -1  11  -6  291.57   34.40
  11 -10  -6  320.77   21.80
 -10  -1  -6  332.47   18.70
  -1  11  -6  319.97   19.10
 -10  -1  -6  344.77   28.40
   1 -11   6  302.97   18.70
 -11  10   6  309.77   21.40
  10   1   6  315.47   20.70
 -11  10   6  331.17   16.30
   0  10  -6  135.49   14.00
 -10   0  -6  186.08   13.20
  10 -10  -6  157.88   16.50
 -10   0  -6  138.99   22.50
   0  10  -6  199.88   27.80
 -10  10   6  140.69   16.20
  10   0   6  185.88   15.10
   0 -10   6  182.68   13.70
 -10  10   6  179.08   11.60
   9 -10  -6   -1.50    7.90
 -10   1  -6   -1.80   11.50
   1   9  -6   -0.80   15.20
   1   9  -6    7.80    6.80
  -1  -9   6   -1.20    5.80
  10  -1   6   -2.90    6.20
  -9  10   6   -8.00    7.20
  -9  10   6   -5.50    4.40
   8 -10  -6   83.99   10.80
 -10   2  -6  128.29   19.10
   2   8  -6   73.09   11.10
   2   8  -6  103.29   15.70
  10  -2   6   98.49   11.60
  -2  -8   6   91.59   10.50
  10  -2   6   97.39   11.80
  -8  10   6   95.59    8.90
  -8  10   6   90.19   12.40
 -10   3  -6   -3.30    9.60
 -10   3  -6   10.90   12.90
   7 -10  -6    1.40    7.40
   3   7  -6    4.50   12.20
   3   7  -6    5.90    6.10
  -7  10   6    8.90    4.20
  10  -3   6   10.00    5.10
  -3  -7   6    4.10    5.10
  -7  10   6   -0.20    6.70
   4   6  -6  226.18   14.70
 -10   4  -6  241.78   21.50
   6 -10  -6  232.08   16.10
   4   6  -6  187.98   22.80
 -10   4  -6  208.78   24.60
  10  -4   6  236.38   14.70
  -6  10   6  227.78   16.70
  -4  -6   6  221.28   13.30
  -6  10   6  228.48   12.70
 -10   5  -6  550.74   33.60
 -10   5  -6  570.04   30.40
   5   5  -6  502.35   29.40
   5 -10  -6  536.35   25.20
   5   5  -6  549.54   25.90
  10  -5   6  535.55   25.70
  -5  10   6  517.45   27.50
  -5  -5   6  528.85   24.00
  -5  10   6  532.45   23.30
   4 -10  -6  240.48   17.60
 -10   6  -6  222.88   19.40
   6   4  -6  234.88   14.80
   4 -10  -6  235.28   15.60
 -10   6  -6  246.68   26.90
   6   4  -6  233.88   21.30
  -6  -4   6  223.58   13.30
  -4  10   6  216.08   12.90
  10  -6   6  234.78   14.90
 -10   7  -6   18.50    9.50
 -10   7  -6    3.70   14.40
   3 -10  -6    8.60    6.60
   7   3  -6    9.40    6.10
   7   3  -6    8.70   10.20
   3 -10  -6    2.10    7.90
  -7  -3   6    3.90    4.70
  10  -7   6    8.70    5.40
  -3  10   6    7.40    4.50
   2 -10  -6   88.09   11.90
 -10   8  -6   94.49   15.80
   2 -10  -6   88.99   12.80
   8   2  -6  102.99   13.50
   8   2  -6   95.19   11.50
 -10   8  -6   90.29   17.50
  -8  -2   6  103.09    9.80
  10  -8   6   96.29   10.90
  -2  10   6  104.69    9.40
   9   1  -6    8.60    6.10
   9   1  -6  -10.10    9.80
 -10   9  -6    0.40   15.40
 -10   9  -6   -4.80    8.40
   1 -10  -6    1.40    8.90
  10  -9   6   -1.70    5.80
  -9  -1   6    0.60    5.10
  -9  -1   6   -5.50    7.90
  -1  10   6    5.80    5.30
  10   0  -6  178.58   18.90
  10   0  -6  188.18   14.20
 -10  10  -6  160.18   18.00
   0 -10  -6  161.08   20.00
 -10  10  -6  157.58   22.40
 -10   0   6  162.18   16.40
   0  10   6  187.08   12.60
 -10   0   6  180.18   12.50
  10 -10   6  175.88   13.80
  11  -1  -6  307.77   23.00
  -1 -10  -6  318.37   25.60
 -10  11  -6  264.77   33.00
 -10  11  -6  294.67   22.20
  11  -1  -6  298.97   18.70
   1  10   6  323.07   17.70
  10 -11   6  325.67   19.00
 -11   1   6  335.57   17.20
   1  10   6  284.47   17.90
 -11   1   6  304.87   21.90
 -10  12  -6  124.69   18.40
  12  -2  -6  149.09   15.20
  -2 -10  -6  181.28   23.80
  12  -2  -6  184.88   21.00
 -10  12  -6  164.28   24.00
   2  10   6  146.19   14.80
 -12   2   6  121.09   19.20
 -12   2   6  192.68   13.10
   2  10   6  158.38   14.00
  10 -12   6  158.38   14.90
 -10  13  -6   -1.20   21.70
  -3 -10  -6   13.00   14.20
  13  -3  -6   16.90   12.10
  13  -3  -6   -8.40    8.50
   3  10   6    4.10    8.10
  10 -13   6    9.10    8.30
 -13   3   6   11.90   11.90
   3  10   6    3.90    8.00
 -13   3   6   -5.20    7.40
 -10  14  -6   74.39   13.20
  -4 -10  -6   57.09   18.70
 -10  14  -6   23.20   25.60
  14  -4  -6   88.49   14.40
 -14   4   6   61.39    8.90
   4  10   6   37.90   10.20
   4  10   6   79.79   10.50
  10 -14   6   93.19   15.60
 -14   4   6   52.99   14.30
  -2  13  -6  180.88   29.40
 -11  -2  -6  220.58   31.30
  13 -11  -6  192.98   21.50
 -11  -2  -6  187.38   17.80
  -2  13  -6  197.48   17.40
 -13  11   6  172.88   14.00
  11   2   6  173.78   18.90
 -13  11   6  157.38   19.70
   2 -13   6  178.88   17.20
  -1  12  -6    2.60    8.20
  -1  12  -6   22.30   21.40
  12 -11  -6   21.30   11.10
 -11  -1  -6    5.20    8.60
 -11  -1  -6   -6.40   14.60
 -12  11   6    3.20   10.80
   1 -12   6    4.70    8.10
 -12  11   6   12.40    6.40
  11   1   6   12.40    8.60
 -11   0  -6   30.00    8.00
 -11   0  -6   17.60   16.30
  11 -11  -6   21.10   10.60
   0  11  -6   17.80   18.80
   0  11  -6   20.00    7.50
   0 -11   6   32.70    8.10
 -11  11   6    9.20    9.70
 -11  11   6   16.40    6.60
  11   0   6   20.50    8.20
 -11   1  -6  337.47   28.80
   1  10  -6  304.27   30.70
   1  10  -6  304.97   19.30
  10 -11  -6  321.07   21.80
 -10  11   6  310.47   16.30
 -10  11   6  304.27   21.00
  11  -1   6  303.27   20.20
  -1 -10   6  322.57   18.80
   2   9  -6   83.09    9.90
 -11   2  -6  103.39   16.10
   2   9  -6   74.29   18.20
   9 -11  -6   71.79   11.40
  11  -2   6   79.79   12.90
  -2  -9   6   82.19   11.40
  -9  11   6   90.79    9.40
  11  -2   6   78.79    9.00
  -9  11   6   90.69   11.90
   3   8  -6   60.09    8.10
   8 -11  -6   49.80    9.90
 -11   3  -6   63.99   13.70
   3   8  -6   60.69   16.00
  -8  11   6   57.39    8.80
  -3  -8   6   57.59    7.90
  11  -3   6   65.89    8.60
  11  -3   6   64.79    8.70
  -8  11   6   37.90    9.40
   4   7  -6  307.97   18.50
 -11   4  -6  312.47   25.50
   4   7  -6  319.07   26.50
   7 -11  -6  310.97   20.10
  11  -4   6  315.67   18.50
  -7  11   6  301.27   20.30
  -4  -7   6  296.97   17.00
 -11   5  -6   27.60   11.40
   5   6  -6    9.40   14.00
   6 -11  -6    8.10    7.70
 -11   5  -6   40.90   16.30
   5   6  -6    9.20    7.30
  -5  -6   6   18.10    5.60
  -6  11   6    4.30    7.50
  11  -5   6   19.70    6.10
  -6  11   6   13.70    5.30
   5 -11  -6   21.60    9.00
   5 -11  -6   13.50    7.70
   6   5  -6   16.30    7.10
   6   5  -6   10.70   13.00
 -11   6  -6    2.00   15.20
 -11   6  -6   14.90   10.00
  -5  11   6   22.00    5.60
  11  -6   6   15.10    6.00
  -6  -5   6   15.10    5.60
 -11   7  -6  323.87   23.50
 -11   7  -6  278.27   31.20
   7   4  -6  308.57   18.40
   4 -11  -6  332.77   19.10
   4 -11  -6  282.37   21.80
   7   4  -6  302.17   25.00
  -4  11   6  304.57   16.10
  -7  -4   6  307.47   16.50
  11  -7   6  311.77   18.30
 -11   8  -6   67.59   12.40
 -11   8  -6   59.79   17.60
   8   3  -6   60.19   13.00
   8   3  -6   73.09   11.30
   3 -11  -6   58.89    9.20
   3 -11  -6   60.79   10.70
  -3  11   6   87.29    9.60
  11  -8   6   72.99   11.00
  -8  -3   6   54.39    7.60
   9   2  -6   94.69   14.00
   9   2  -6   81.79   12.40
 -11   9  -6   72.99   18.60
 -11   9  -6   76.79   12.40
   2 -11  -6  101.69   16.20
   2 -11  -6   65.49    9.50
  11  -9   6   62.79    8.80
  -2  11   6   89.99   10.50
  -9  -2   6   67.39   10.20
 -11  10  -6  322.77   22.50
 -11  10  -6  263.17   32.50
  10   1  -6  278.47   22.90
  10   1  -6  304.37   18.90
   1 -11  -6  309.07   24.50
  11 -10   6  311.17   18.90
 -10  -1   6  293.17   16.60
  -1  11   6  314.07   17.00
  11   0  -6   19.40   12.80
  11   0  -6   42.00    8.10
 -11  11  -6   10.50   19.70
 -11  11  -6   44.40   11.50
   0 -11  -6   18.00   12.20
   0  11   6   41.40    7.30
  11 -11   6   32.10    7.90
 -11   0   6   32.70    7.50
 -11   0   6   31.20   10.70
  -1 -11  -6  -16.30   12.90
  12  -1  -6   -0.70    7.70
  12  -1  -6   -4.30   12.90
 -11  12  -6   16.90   10.40
 -11  12  -6  -33.70   19.20
  11 -12   6   12.60    7.70
 -12   1   6   18.60   11.80
 -12   1   6    3.50    7.10
   1  11   6   11.40    6.90
 -11  13  -6  180.08   20.50
 -11  13  -6  167.48   27.10
  13  -2  -6  167.48   17.20
  -2 -11  -6  172.68   26.30
  13  -2  -6  163.48   24.40
   2  11   6  206.88   16.00
  11 -13   6  189.68   17.80
 -13   2   6  190.78   14.90
 -13   2   6  133.19   22.30
   2  11   6  181.78   16.50
 -12  -1  -6  -29.10   17.50
  13 -12  -6  -15.40   12.10
  -1  13  -6   38.20   27.10
  -1  13  -6    1.20    9.10
 -13  12   6    0.40    7.10
  12   1   6    9.10    9.50
   1 -13   6   12.60    9.60
 -13  12   6   -3.70   11.80
   0  12  -6   52.99   23.60
 -12   0  -6   69.59   19.00
   0  12  -6   39.30    9.80
  12 -12  -6   58.79   13.40
 -12  12   6   42.40   12.70
 -12  12   6   57.69    8.00
   0 -12   6   92.09   14.80
  12   0   6   42.00   10.20
   1  11  -6   11.20    8.30
   1  11  -6   -5.00   20.30
 -12   1  -6   34.30   15.10
  11 -12  -6    1.90   11.00
  -1 -11   6   -0.20    8.00
 -11  12   6    5.80    6.30
 -11  12   6    1.70    9.40
  12  -1   6   -8.80    8.10
   2  10  -6  164.78   22.00
  10 -12  -6  156.78   18.70
   2  10  -6  152.28   15.40
 -12   2  -6  150.08   19.80
 -10  12   6  157.08   12.80
  12  -2   6  148.99   16.80
 -10  12   6  167.48   17.50
  -2 -10   6  179.98   14.80
 -12   3  -6  337.97   29.40
   3   9  -6  316.27   32.50
   9 -12  -6  379.06   23.70
   3   9  -6  350.96   21.70
  -9  12   6  354.36   23.30
  -3  -9   6  357.36   20.10
  -9  12   6  384.76   18.30
  12  -3   6  337.37   21.80
  12  -3   6  358.86   20.50
 -12   4  -6  138.39   22.40
   4   8  -6  111.49   19.10
   8 -12  -6  120.79   17.20
   4   8  -6  125.09   14.00
  -4  -8   6  108.79   12.80
  -8  12   6  112.09   11.00
  -8  12   6   89.99   15.40
  12  -4   6  105.39   15.00
  12  -4   6  124.59   15.00
   5   7  -6   10.00   15.50
 -12   5  -6   20.10   10.70
   5   7  -6   -3.70    7.90
   7 -12  -6    4.30    8.90
  -7  12   6   -8.40    5.50
  -7  12   6    3.00    9.00
  12  -5   6    4.40    7.90
  -5  -7   6   -6.60    6.00
  12  -5   6    4.80    6.50
   6 -12  -6   17.70    9.80
   6   6  -6   12.20   15.60
   6   6  -6   17.60    7.80
 -12   6  -6   21.70   11.50
  12  -6   6   30.60    7.20
  -6  12   6   14.40    8.70
  12  -6   6   -1.30    9.30
  -6  -6   6   22.50    6.40
  -6  12   6   22.00    6.00
   5 -12  -6    8.00    9.30
   7   5  -6    4.70    7.30
   5 -12  -6    8.30    8.70
   7   5  -6   14.20   14.40
 -12   7  -6   -3.20    9.90
  -7  -5   6    0.10    6.30
  12  -7   6    6.00    5.90
  -5  12   6    7.50    5.60
 -12   8  -6  130.39   21.40
   8   4  -6   92.29   13.90
   8   4  -6  112.79   17.50
   4 -12  -6  123.79   16.10
 -12   8  -6  114.19   19.40
   4 -12  -6  123.09   17.90
  -4  12   6  139.29   11.60
  12  -8   6   91.79   13.60
  -8  -4   6  121.39   11.60
   9   3  -6  332.87   28.00
 -12   9  -6  346.07   25.60
 -12   9  -6  383.26   34.80
   3 -12  -6  326.87   21.10
   9   3  -6  369.06   21.00
   3 -12  -6  324.67   24.80
  -9  -3   6  358.46   18.70
  -3  12   6  371.06   19.30
  12  -9   6  378.26   21.40
  10   2  -6  156.48   22.90
  10   2  -6  158.68   15.40
 -12  10  -6  221.38   31.30
 -12  10  -6  177.38   20.70
   2 -12  -6  140.49   20.30
  12 -10   6  156.48   15.10
 -10  -2   6  135.69   12.90
  -2  12   6  182.58   13.50
  11   1  -6  -22.70   14.60
 -12  11  -6   34.50   19.80
  11   1  -6   21.60    8.20
 -12  11  -6    9.00   11.30
   1 -12  -6   -3.90   12.20
 -11  -1   6    7.30    6.90
  12 -11   6   -0.70    7.50
  -1  12   6   18.70    7.00
  12   0  -6   96.59   14.70
   0 -12  -6   48.10   15.90
 -12  12  -6   58.49   13.00
 -12  12  -6   54.99   21.30
  12   0  -6   51.39   16.10
   0  12   6   65.09    9.70
 -12   0   6   54.29    9.20
  12 -12   6   68.09   10.70
  -1 -12  -6    4.60   16.10
 -12  13  -6   -8.10   12.30
  13  -1  -6    9.30    8.80
  13  -1  -6    7.90   15.50
 -13   1   6  -14.60    7.80
   1  12   6    7.90    8.40
  12 -13   6  -10.80    9.00
   1  12  -6   -5.30    9.00
 -13   1  -6  -14.10   16.70
  12 -13  -6    8.70   12.80
  13  -1   6   -9.80    9.20
 -12  13   6   -1.40    7.50
  -1 -12   6   11.90    9.10
 -12  13   6   -0.70   10.70
   2  11  -6  184.58   17.40
  11 -13  -6  180.98   22.40
 -13   2  -6  213.18   29.20
  13  -2   6  169.28   19.00
  -2 -11   6  178.88   17.30
 -11  13   6  191.38   20.60
 -13   3  -6    7.60   15.80
  10 -13  -6   -4.00   11.20
   3  10  -6  -15.90    8.40
 -10  13   6    9.60    7.00
 -10  13   6   -9.40    9.80
  -3 -10   6    0.10    8.90
  13  -3   6   -4.20    8.90
   9 -13  -6  -12.50   10.70
   4   9  -6   -2.80    8.50
 -13   4  -6   -3.00   13.00
  13  -4   6    4.40    8.00
  -9  13   6  -11.40    6.30
  13  -4   6   -6.10    8.70
  -4  -9   6   -8.00    7.80
   5   8  -6  202.88   17.20
   8 -13  -6  197.48   20.40
 -13   5  -6  232.08   26.00
  13  -5   6  180.38   17.60
  -8  13   6  206.98   19.70
  13  -5   6  190.08   18.10
  -8  13   6  207.68   14.00
  -5  -8   6  187.38   15.20
   7 -13  -6   51.79   11.70
 -13   6  -6   35.30   13.50
   6   7  -6   35.00    9.40
  -7  13   6   31.50    6.90
  -7  13   6   32.90   11.60
  -6  -7   6   46.50    8.10
  13  -6   6   27.10   11.00
  13  -6   6   47.30    9.00
   7   6  -6   24.00    8.80
   6 -13  -6   44.90   11.80
 -13   7  -6   13.30   13.30
   6 -13  -6   42.10   11.40
  -6  13   6   45.20    7.50
  -7  -6   6   25.00    7.40
  13  -7   6   28.30    8.70
  13  -7   6   36.40   10.40
 -13   8  -6  188.68   22.20
   5 -13  -6  170.48   21.30
   5 -13  -6  203.08   19.30
   8   5  -6  204.58   16.90
  -8  -5   6  190.18   14.60
  13  -8   6  216.88   16.70
  13  -8   6  199.28   19.20
  -5  13   6  192.18   14.60
   4 -13  -6   17.30   10.50
   9   4  -6    4.30    8.30
   4 -13  -6    1.60   11.40
 -13   9  -6   -7.10   12.30
  -4  13   6    3.90    6.90
  13  -9   6  -13.10    7.30
  13  -9   6    6.10   10.20
  -9  -4   6   -9.70    6.80
  10   3  -6   12.90    8.50
   3 -13  -6   17.50   12.50
 -13  10  -6   -5.40   12.20
  -3  13   6   24.90    7.30
 -10  -3   6    4.70    7.20
  13 -10   6   -6.50   10.40
  13 -10   6   -5.60    8.30
 -13  11  -6  138.59   22.10
  11   2  -6  152.58   17.10
   2 -13  -6  167.28   24.70
  13 -11   6  168.88   17.30
  13 -11   6  156.58   21.60
 -11  -2   6  170.38   14.70
  -2  13   6  193.28   15.70
  12   1  -6   23.10    9.60
   1 -13  -6   -9.70   15.80
 -13  12  -6   -2.70   12.40
  13 -12   6    0.30   12.00
  -1  13   6    3.10    8.20
 -12  -1   6    1.70    8.00
  13 -12   6    0.70    9.00
   4  10  -6   59.09   11.20
  10 -14  -6   62.59   14.00
 -14   4  -6   85.19   18.00
 -10  14   6   64.19    8.80
  14  -4   6   41.90   11.40
 -10  14   6   49.30   14.00
  -4 -10   6   44.80   10.70
 -14   5  -6   17.70   15.90
   9 -14  -6    7.50   12.50
   5   9  -6   12.50    9.30
  -9  14   6    7.80   11.10
  -5  -9   6  -10.50    8.30
  14  -5   6   18.50   11.00
  14  -5   6   -3.80    8.90
  -9  14   6    5.90    7.20
 -14   6  -6  101.69   17.90
   6   8  -6   99.19   12.90
   8 -14  -6  128.49   15.90
  14  -6   6  111.49   17.60
  -6  -8   6  131.59   13.80
  -8  14   6  108.79   13.10
  -8  14   6  111.59   15.40
  14  -6   6  113.09   13.80
 -14   7  -6  115.69   18.80
   7 -14  -6  129.29   16.00
   7 -14  -6  150.78   20.50
   7   7  -6  115.09   16.40
  -7  -7   6  115.59   14.40
  -7  14   6  171.38   14.40
  14  -7   6  139.49   19.50
  14  -7   6  144.09   18.10
   6 -14  -6   68.09   15.70
 -14   8  -6   78.49   17.10
   8   6  -6  113.19   15.70
   6 -14  -6  134.69   20.40
  -8  -6   6  104.39   13.60
  -6  14   6  124.29   14.00
  14  -8   6  107.59   17.10
  14  -8   6  111.39   15.10
 -14   9  -6   -2.50   13.50
   9   5  -6    3.90    9.50
   5 -14  -6   18.90   12.40
   5 -14  -6   18.60   13.30
  -9  -5   6    7.70    8.20
  14  -9   6   12.20   12.40
  -5  14   6   23.60    8.30
  14  -9   6   17.90    9.00
 -14  10  -6   46.40   14.50
  10   4  -6   51.29   10.70
   4 -14  -6   41.90   14.10
  14 -10   6   52.59   13.70
  -4  14   6   93.59   13.90
  14 -10   6   62.89   10.50
 -10  -4   6   53.19    9.70
   0   0  -7    0.90    4.50
   0   0  -7   -2.30    3.30
   0   0   7    1.10    2.00
   0   0   7    0.70    1.70
   1  -1  -7  136.19    8.90
  -1   0  -7  139.69   11.10
   1  -1  -7  139.19   10.00
  -1   0  -7  128.79    9.40
   0   1  -7  128.09   10.90
   0  -1   7  144.39    6.80
   1   0   7  131.79    7.50
  -1   1   7  143.09    7.30
   0  -1   7  137.69    7.70
  -1   1   7  132.79    6.80
   1   0   7  126.19    6.60
   0  -1  -7  141.09    9.40
   0  -1  -7  133.69   10.10
  -1   1  -7  138.59    9.30
  -1   1  -7  125.99   11.20
   1   0  -7  124.69   10.70
   1  -1   7  136.49    6.70
   0   1   7  131.59    6.80
  -1   0   7  141.29    7.40
  -1   0   7  142.29    7.00
   1  -1   7  143.59    7.70
   0   1   7  132.99    7.40
[truncated: 3,329,386 more chars]
